# Supplementary material for: Tissue-Specific Remodeling of the Mitochondrial Proteome in Type 1 Diabetic Akita Mice
Source: PubMed Central journal article supplement — Diabetes. 2009 Jun 19;58(9):1986–97. doi: 10.2337/db09-0259 (PMC2731527; doi:10.2337/db09-0259), 2009-06-19

Figure S4 Cellular Location MATRIX -ALL TISSUES

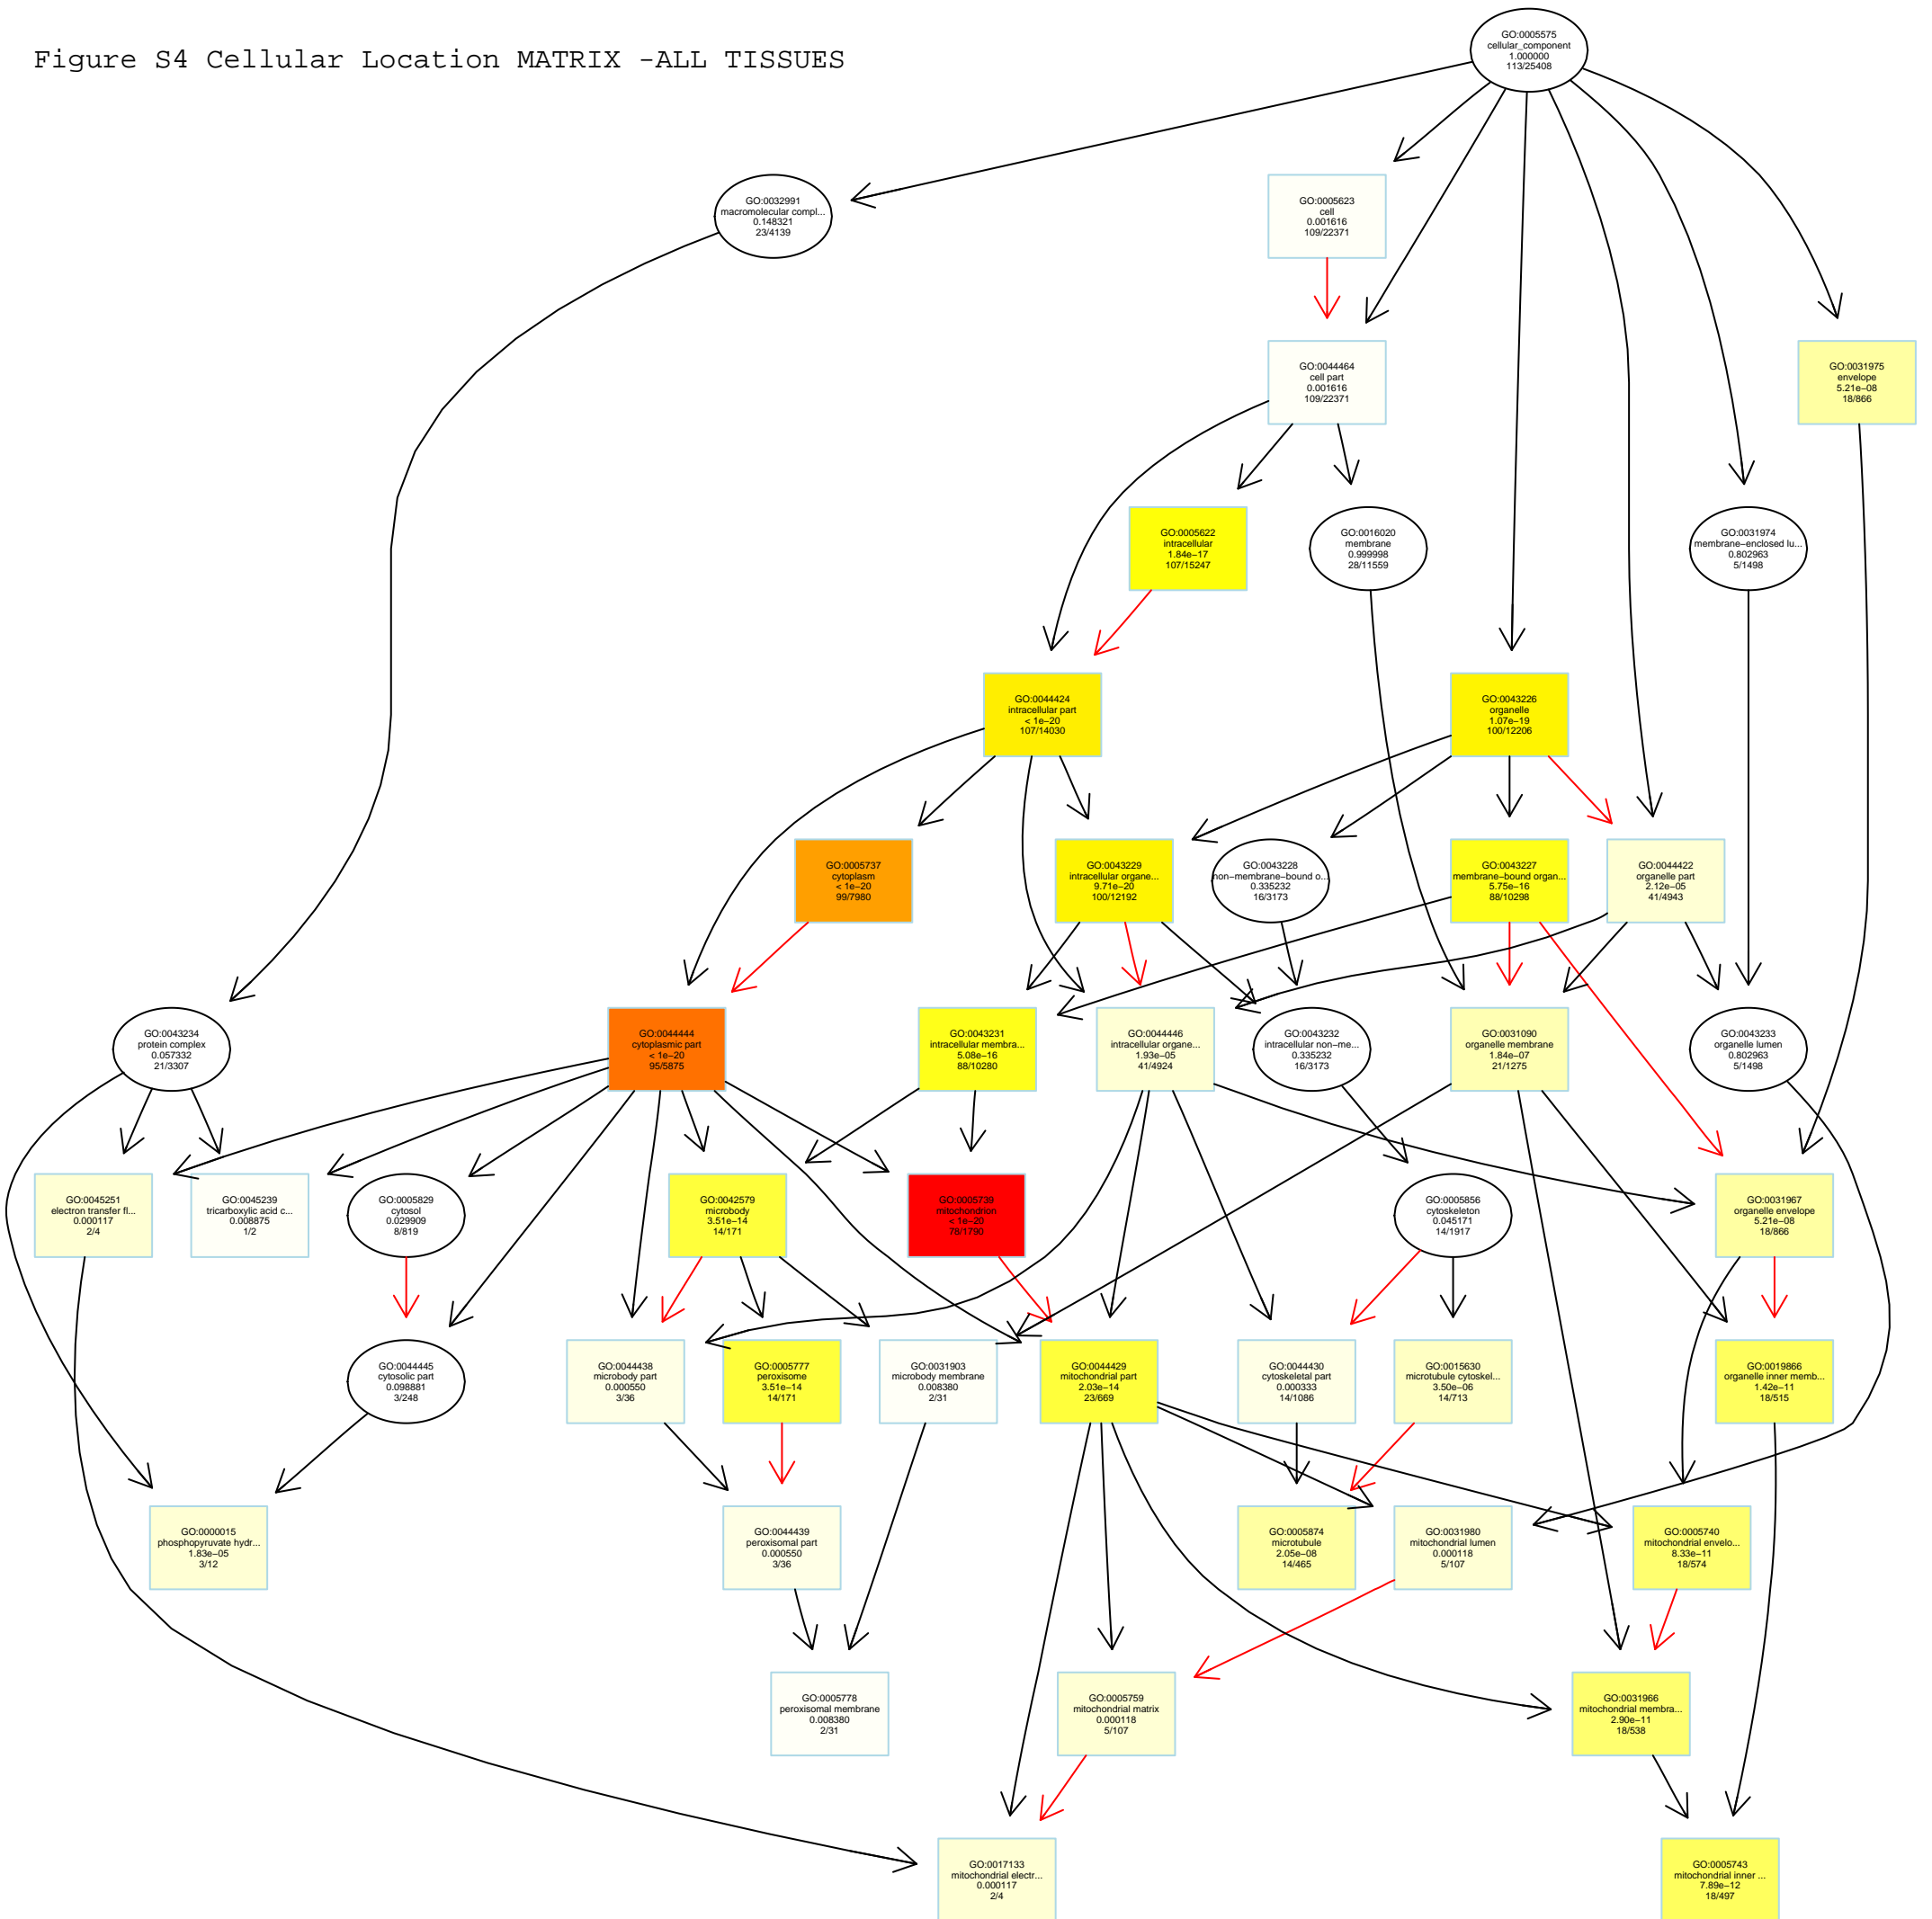

Figure S4 Molecular Function MATRIX- ALL TISSUES

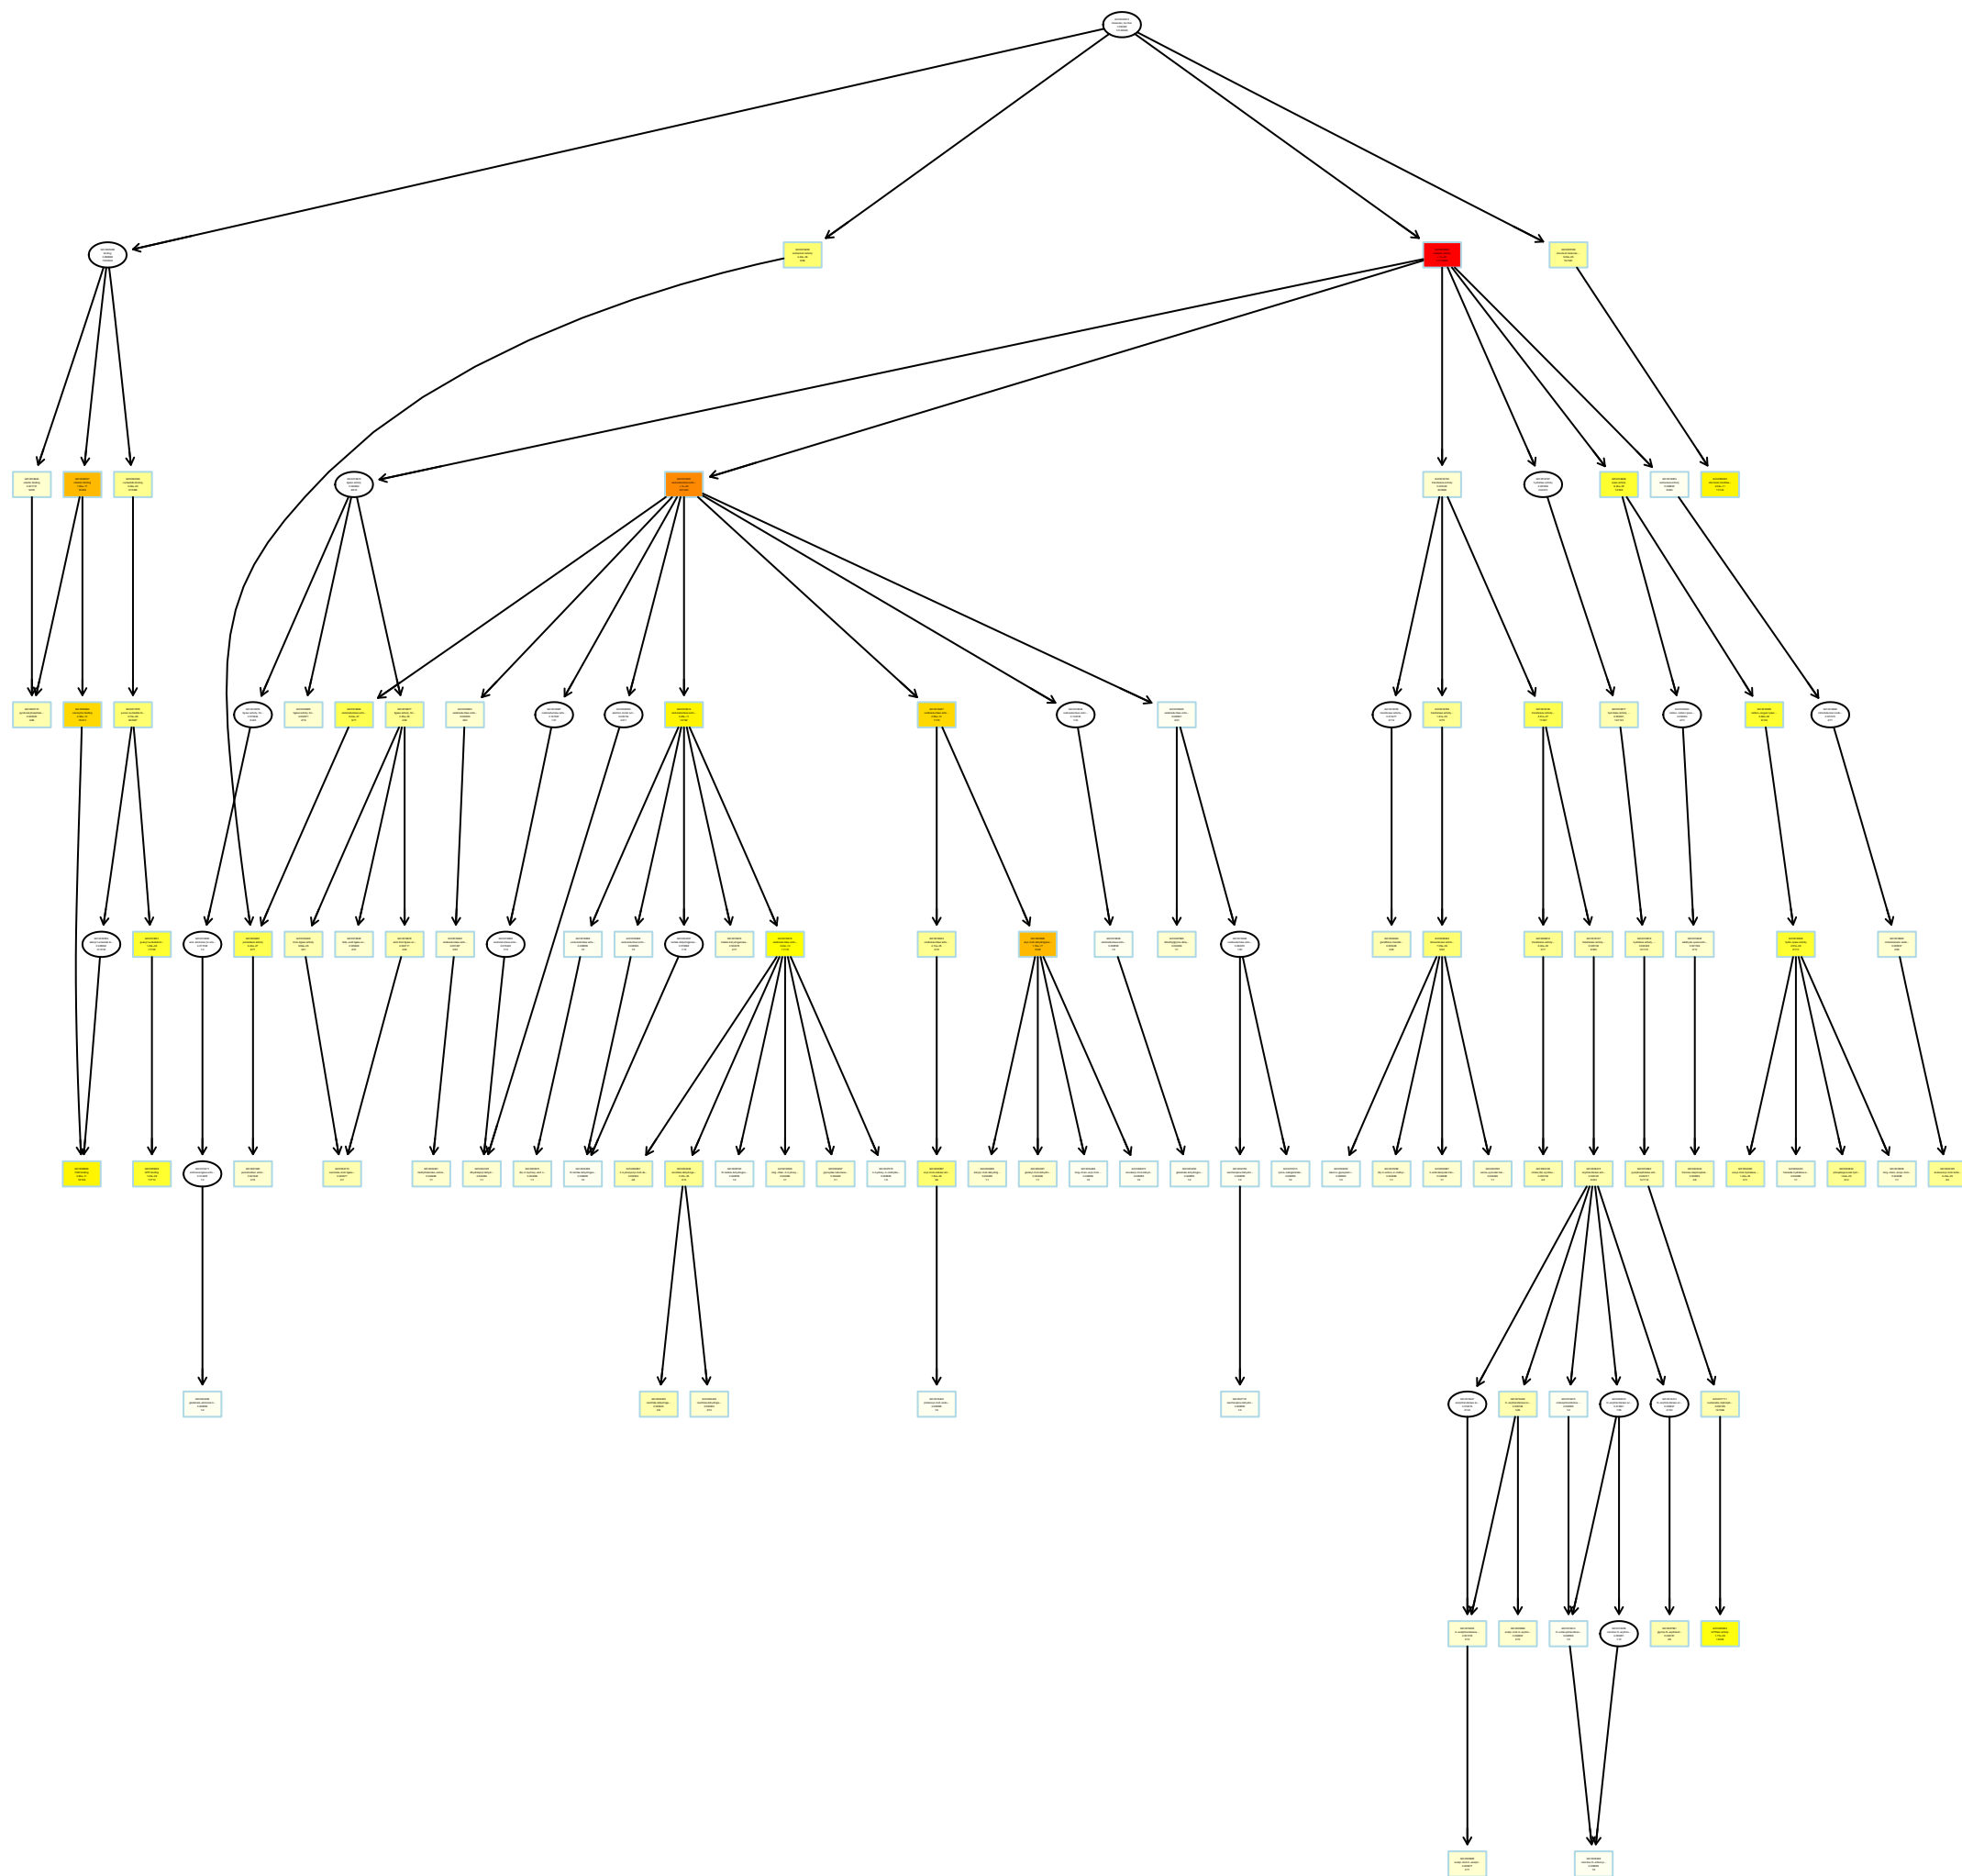

Figure S4 Biological Process MATRIX -ALL TISSUES

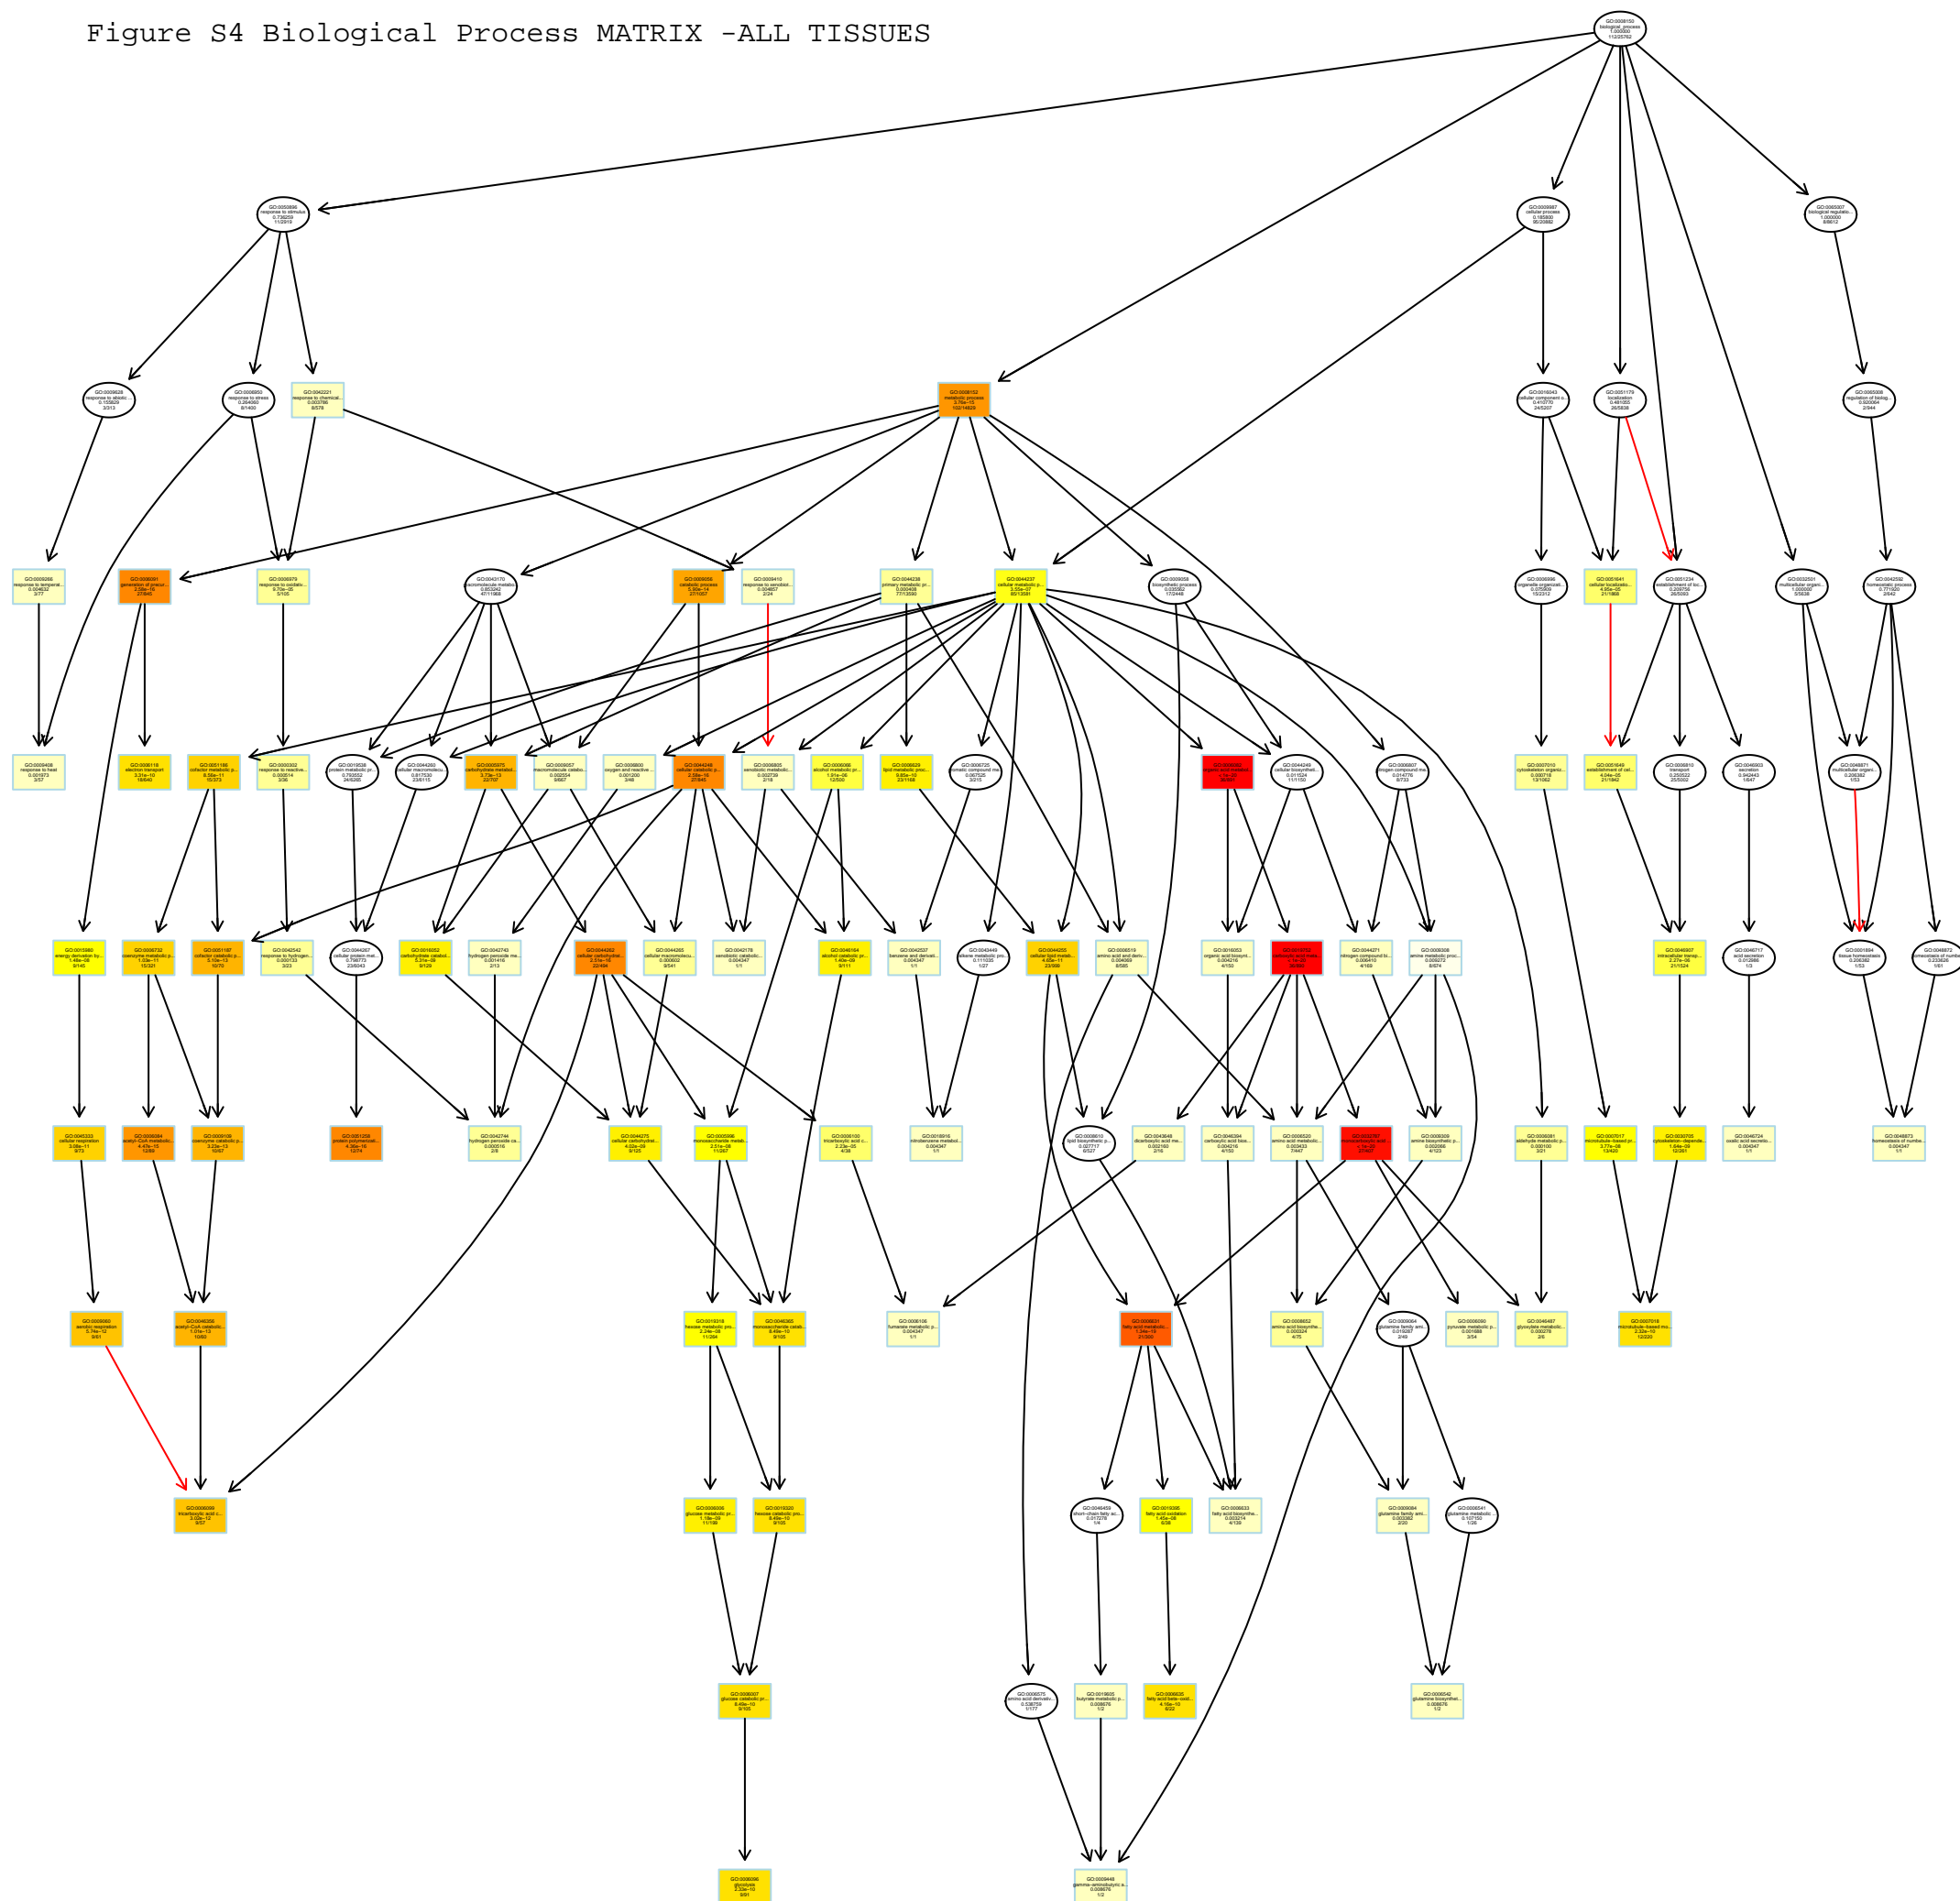

Figure S5 Cellular Location - MEMBRANE -ALL TISSUES

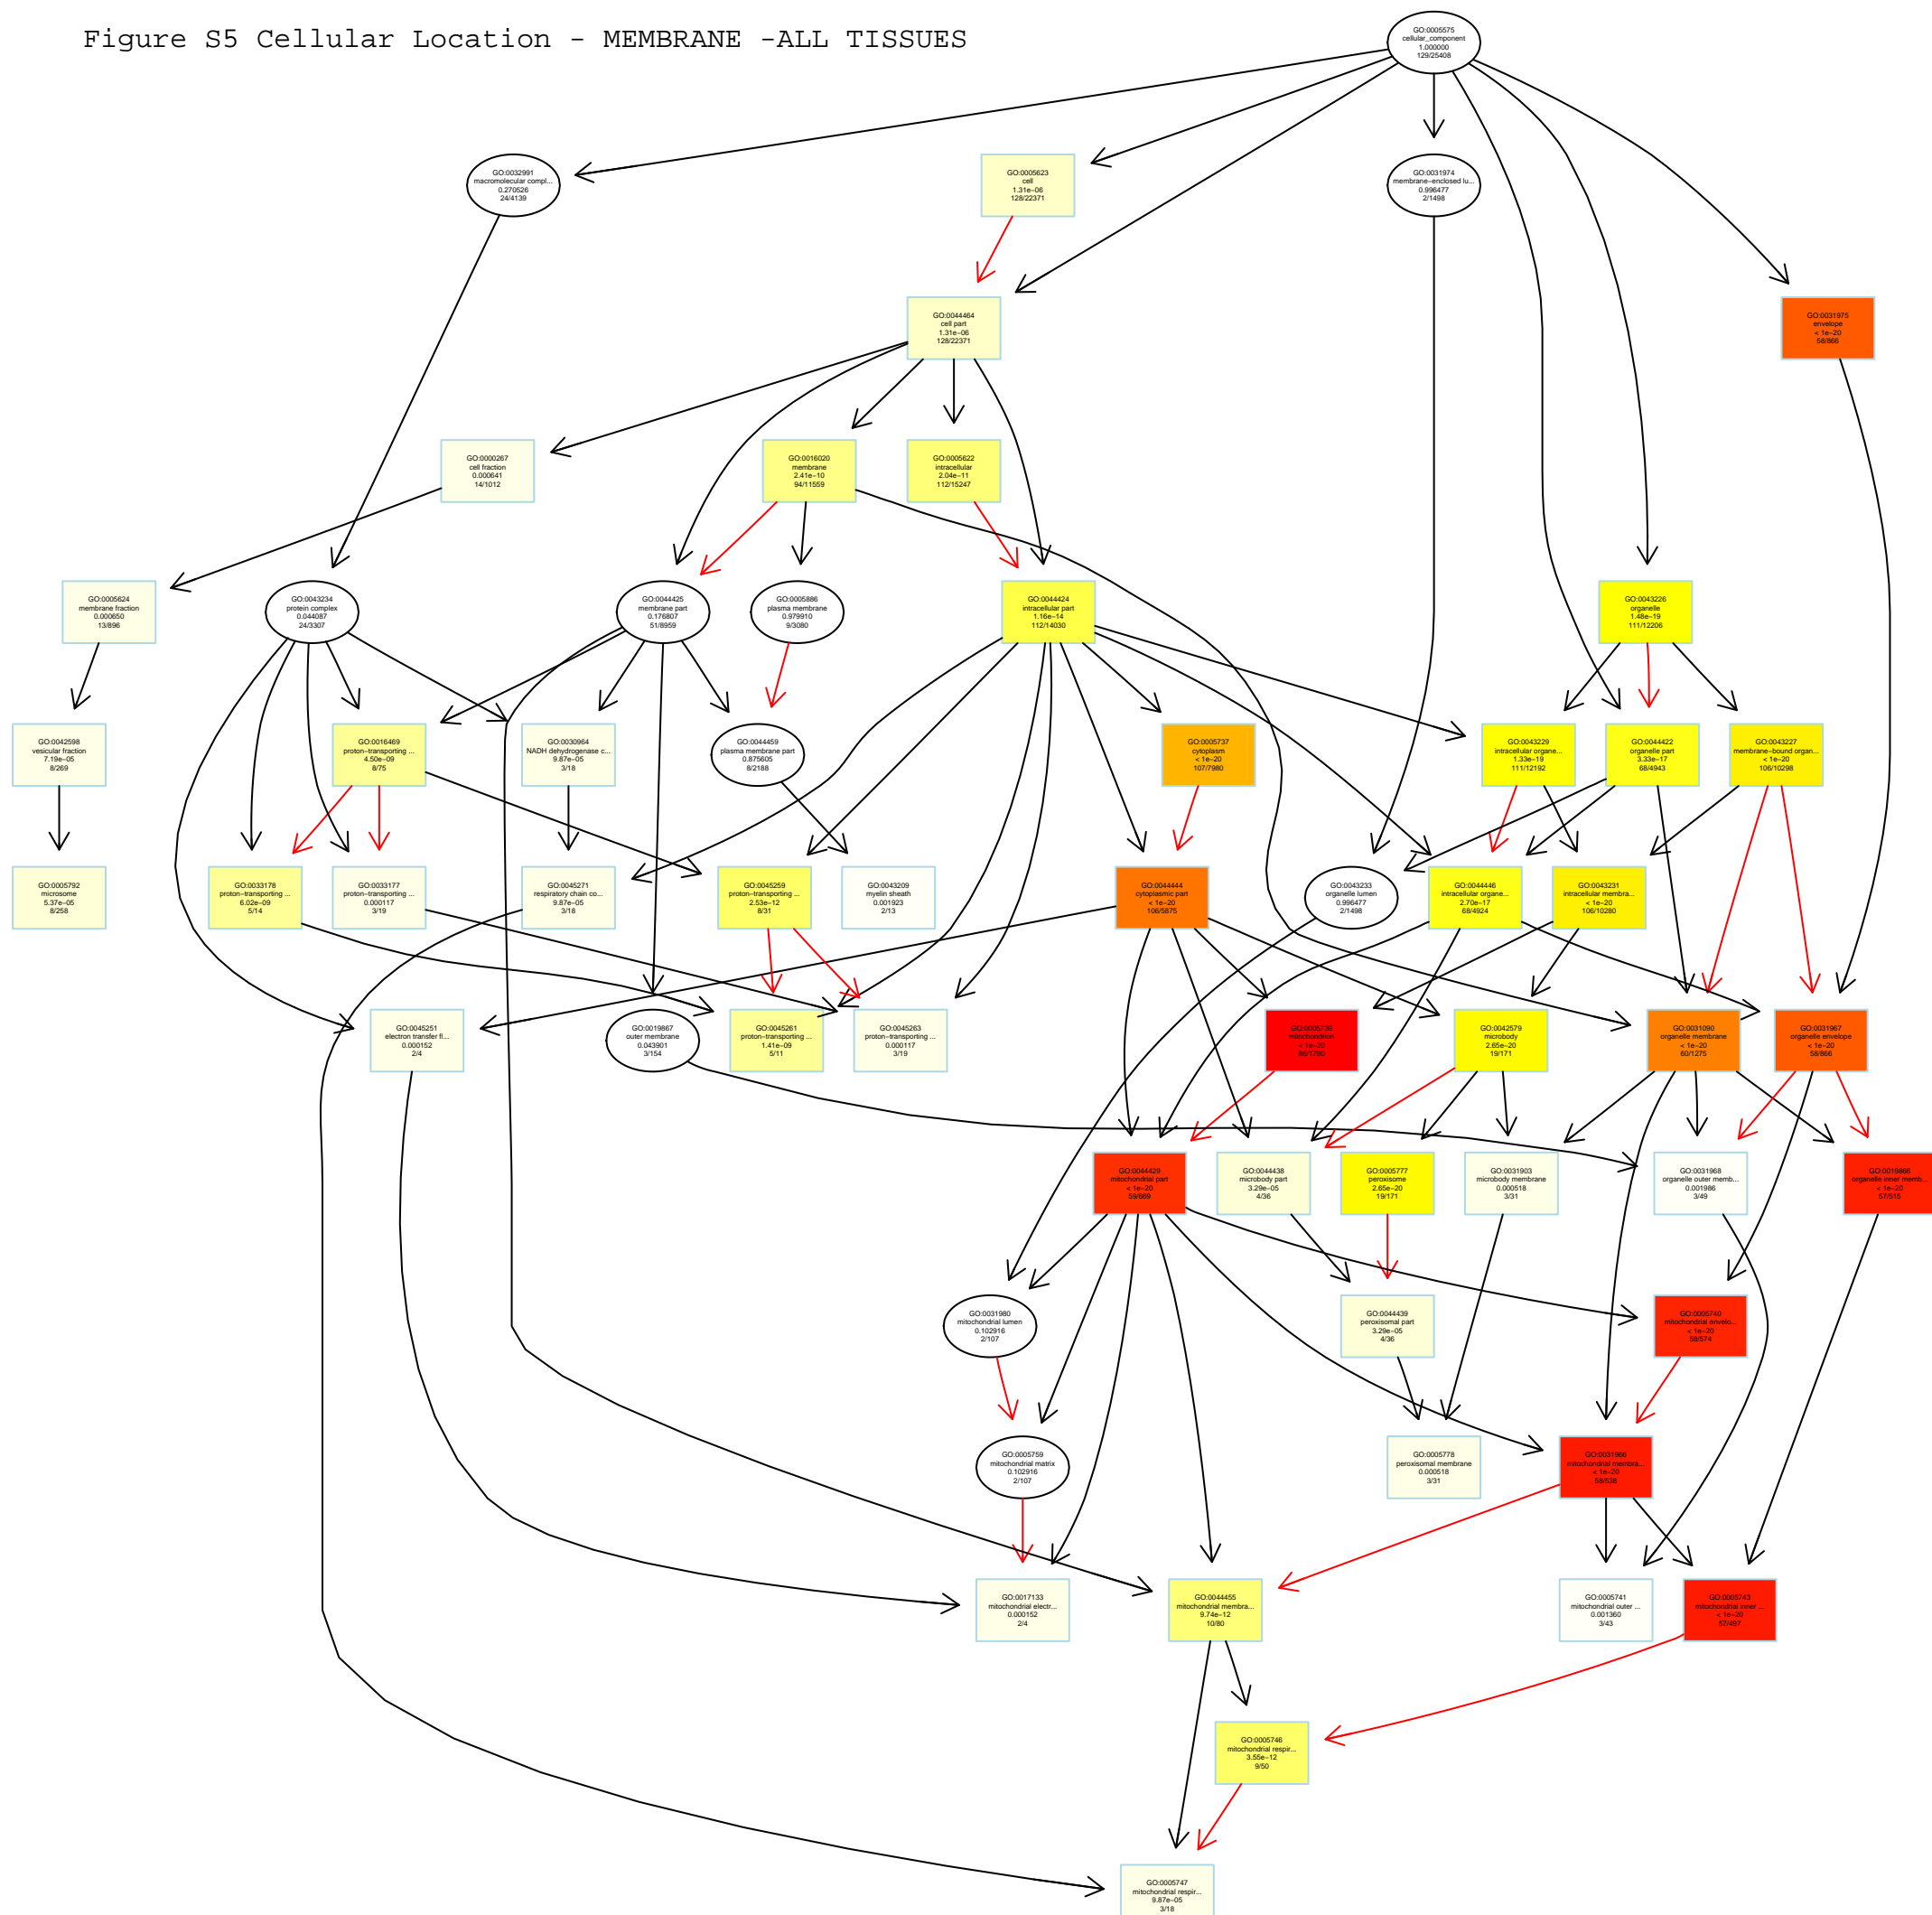

Figure S5 Molecular Function MEMBRANE - ALL TISSUES

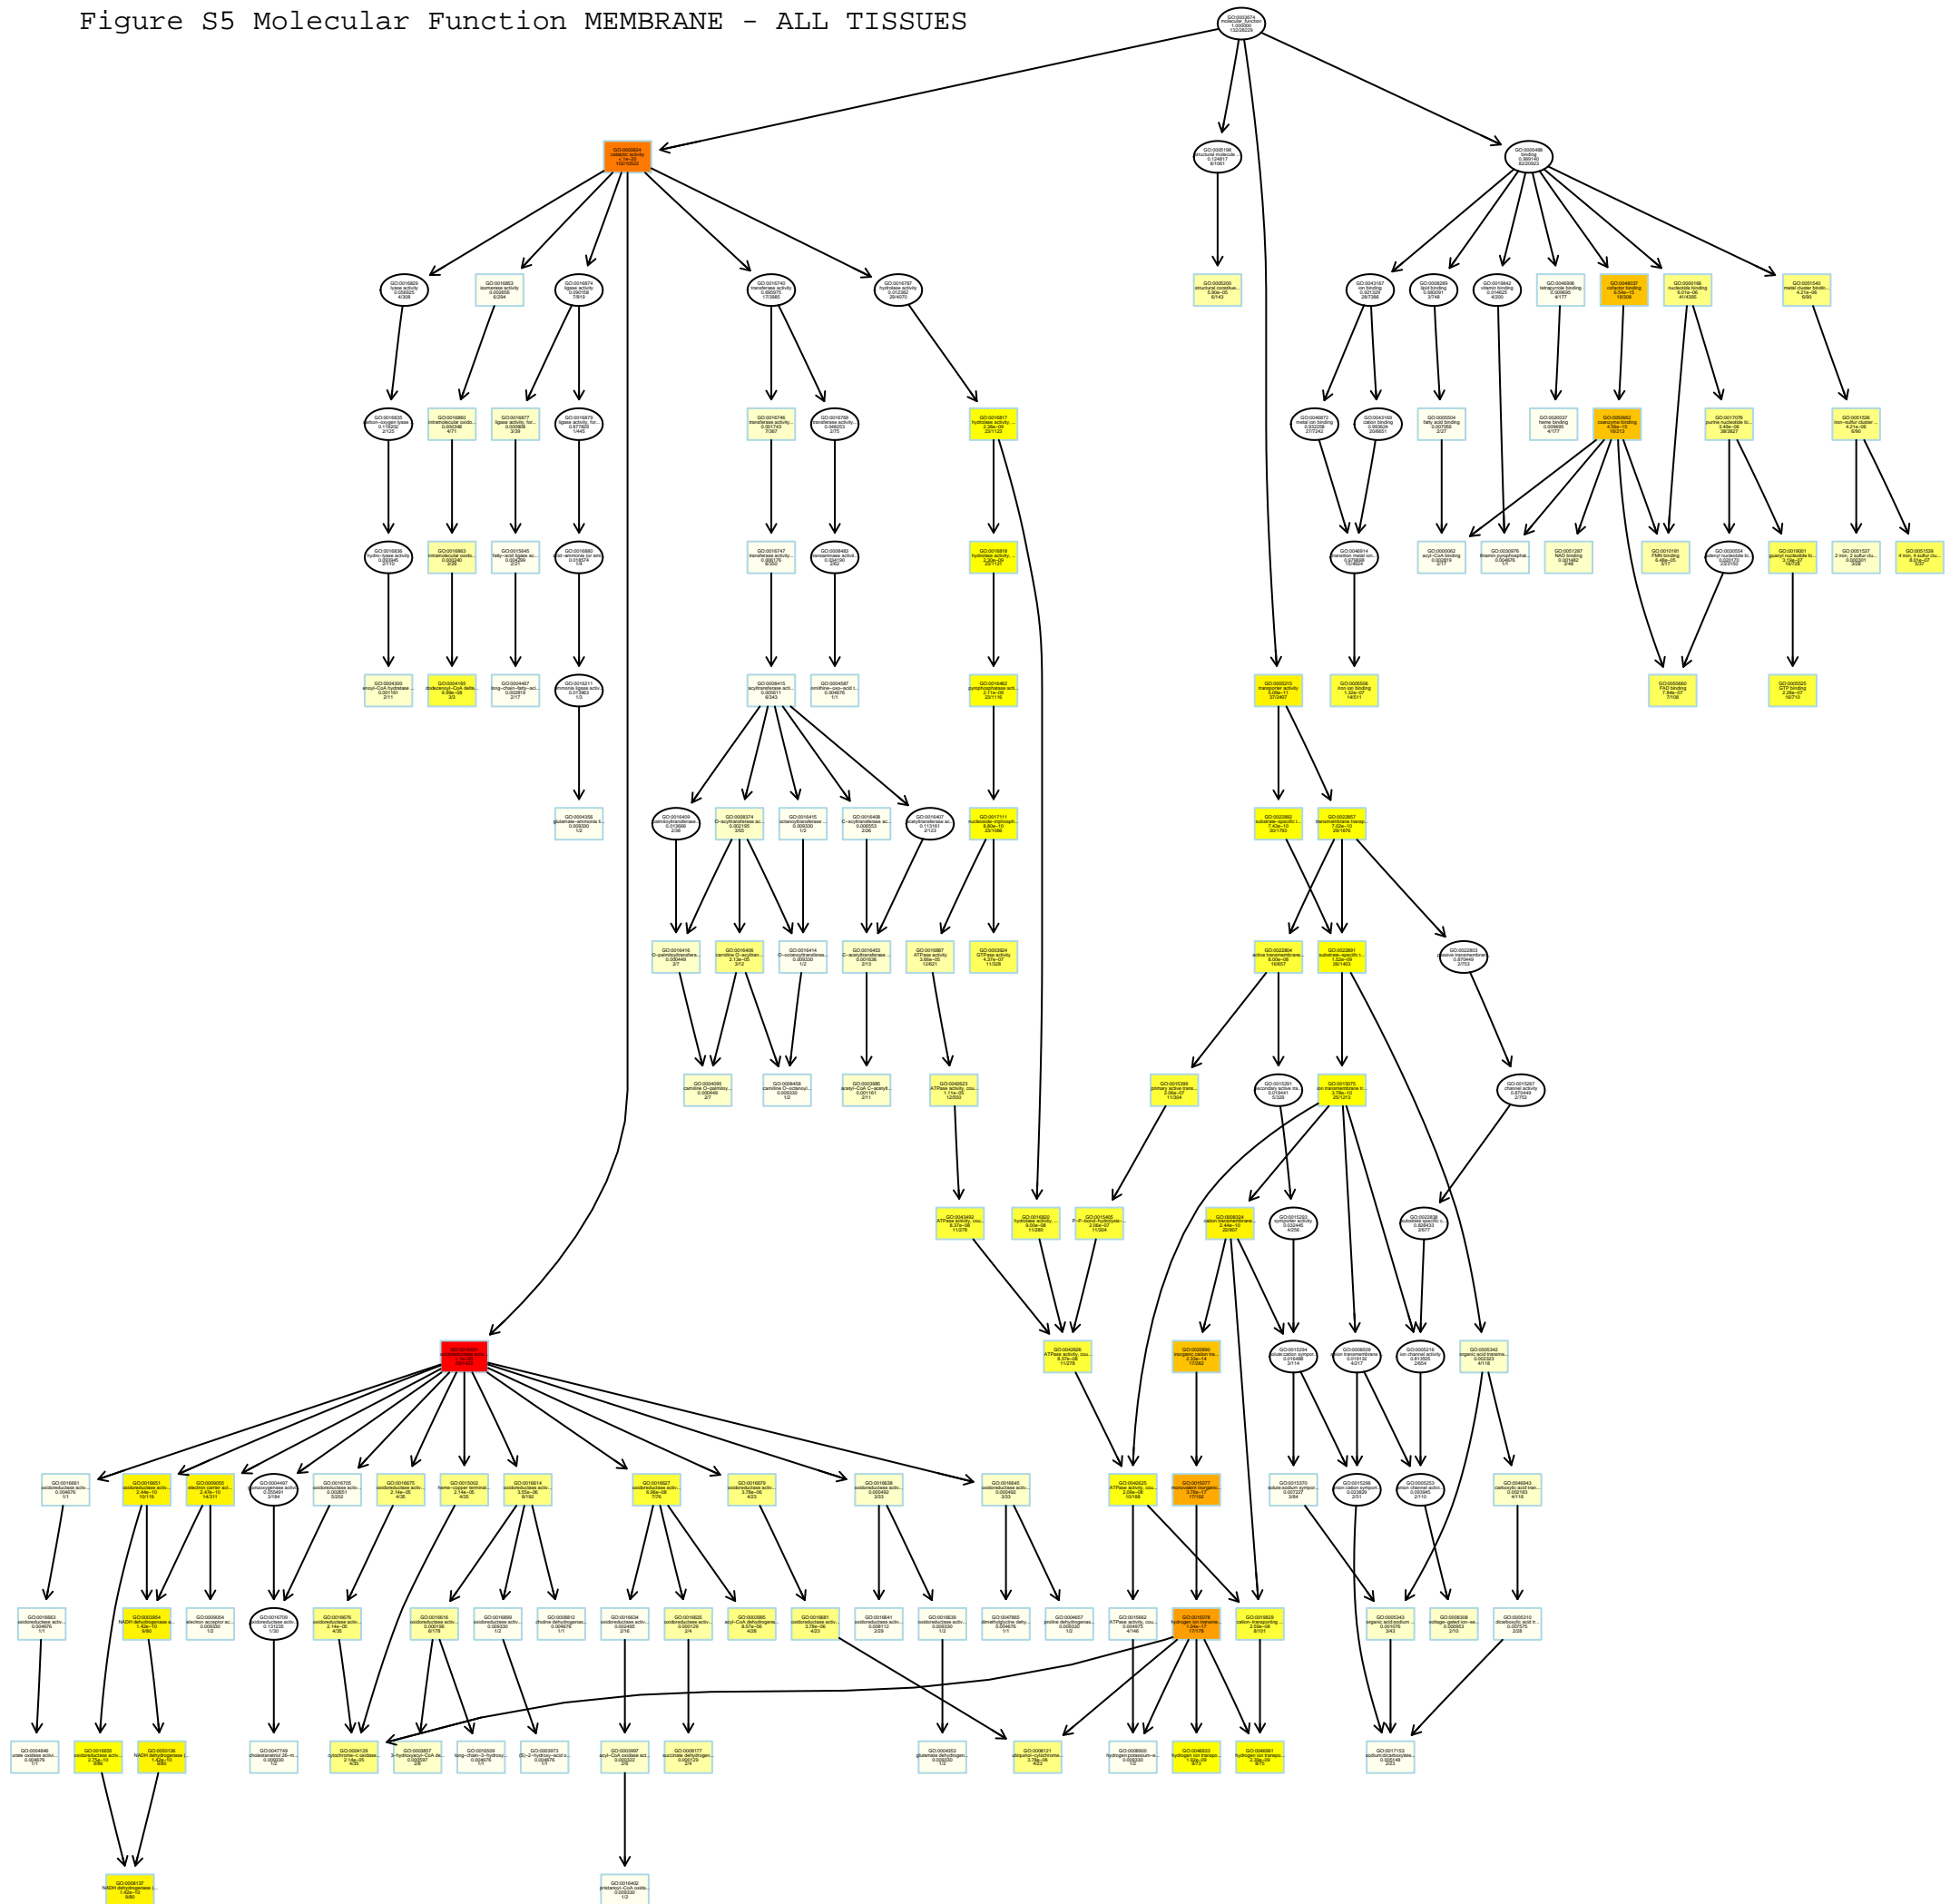

Figure S5 Biological Process - MEMBRANE -ALL TISSUES

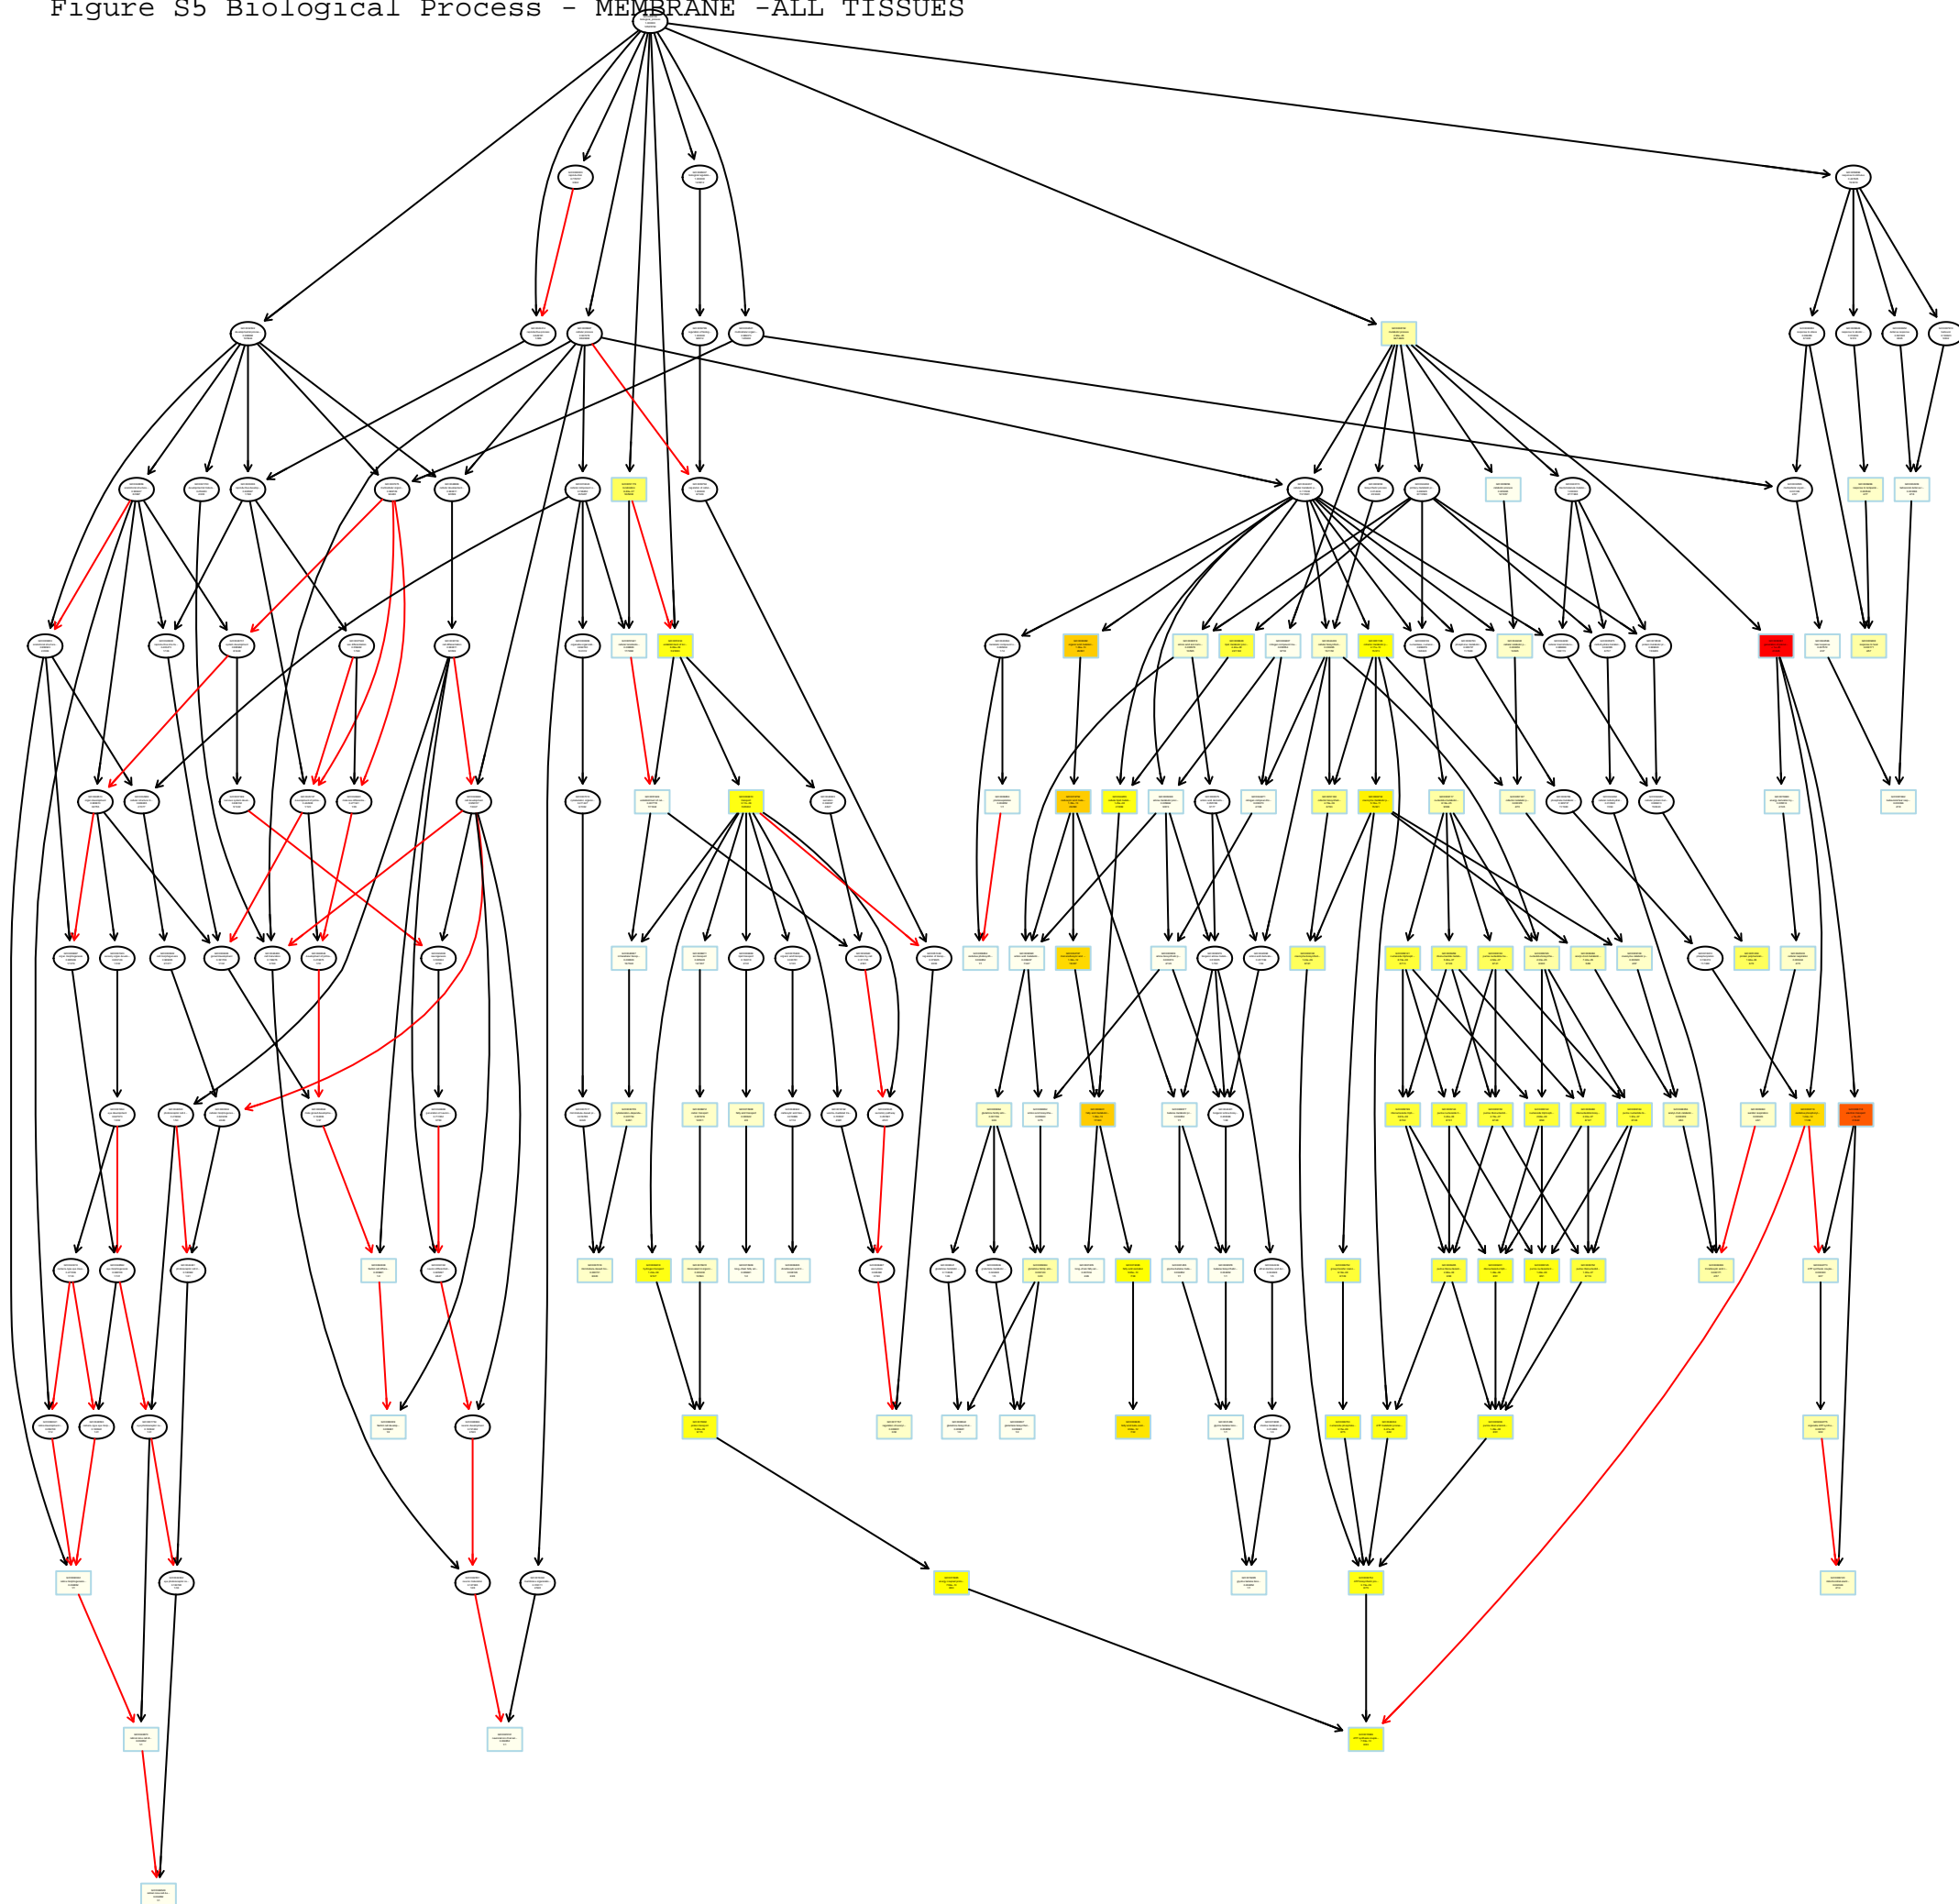

Figure S6 Cellular Location MATRIX - LIVER

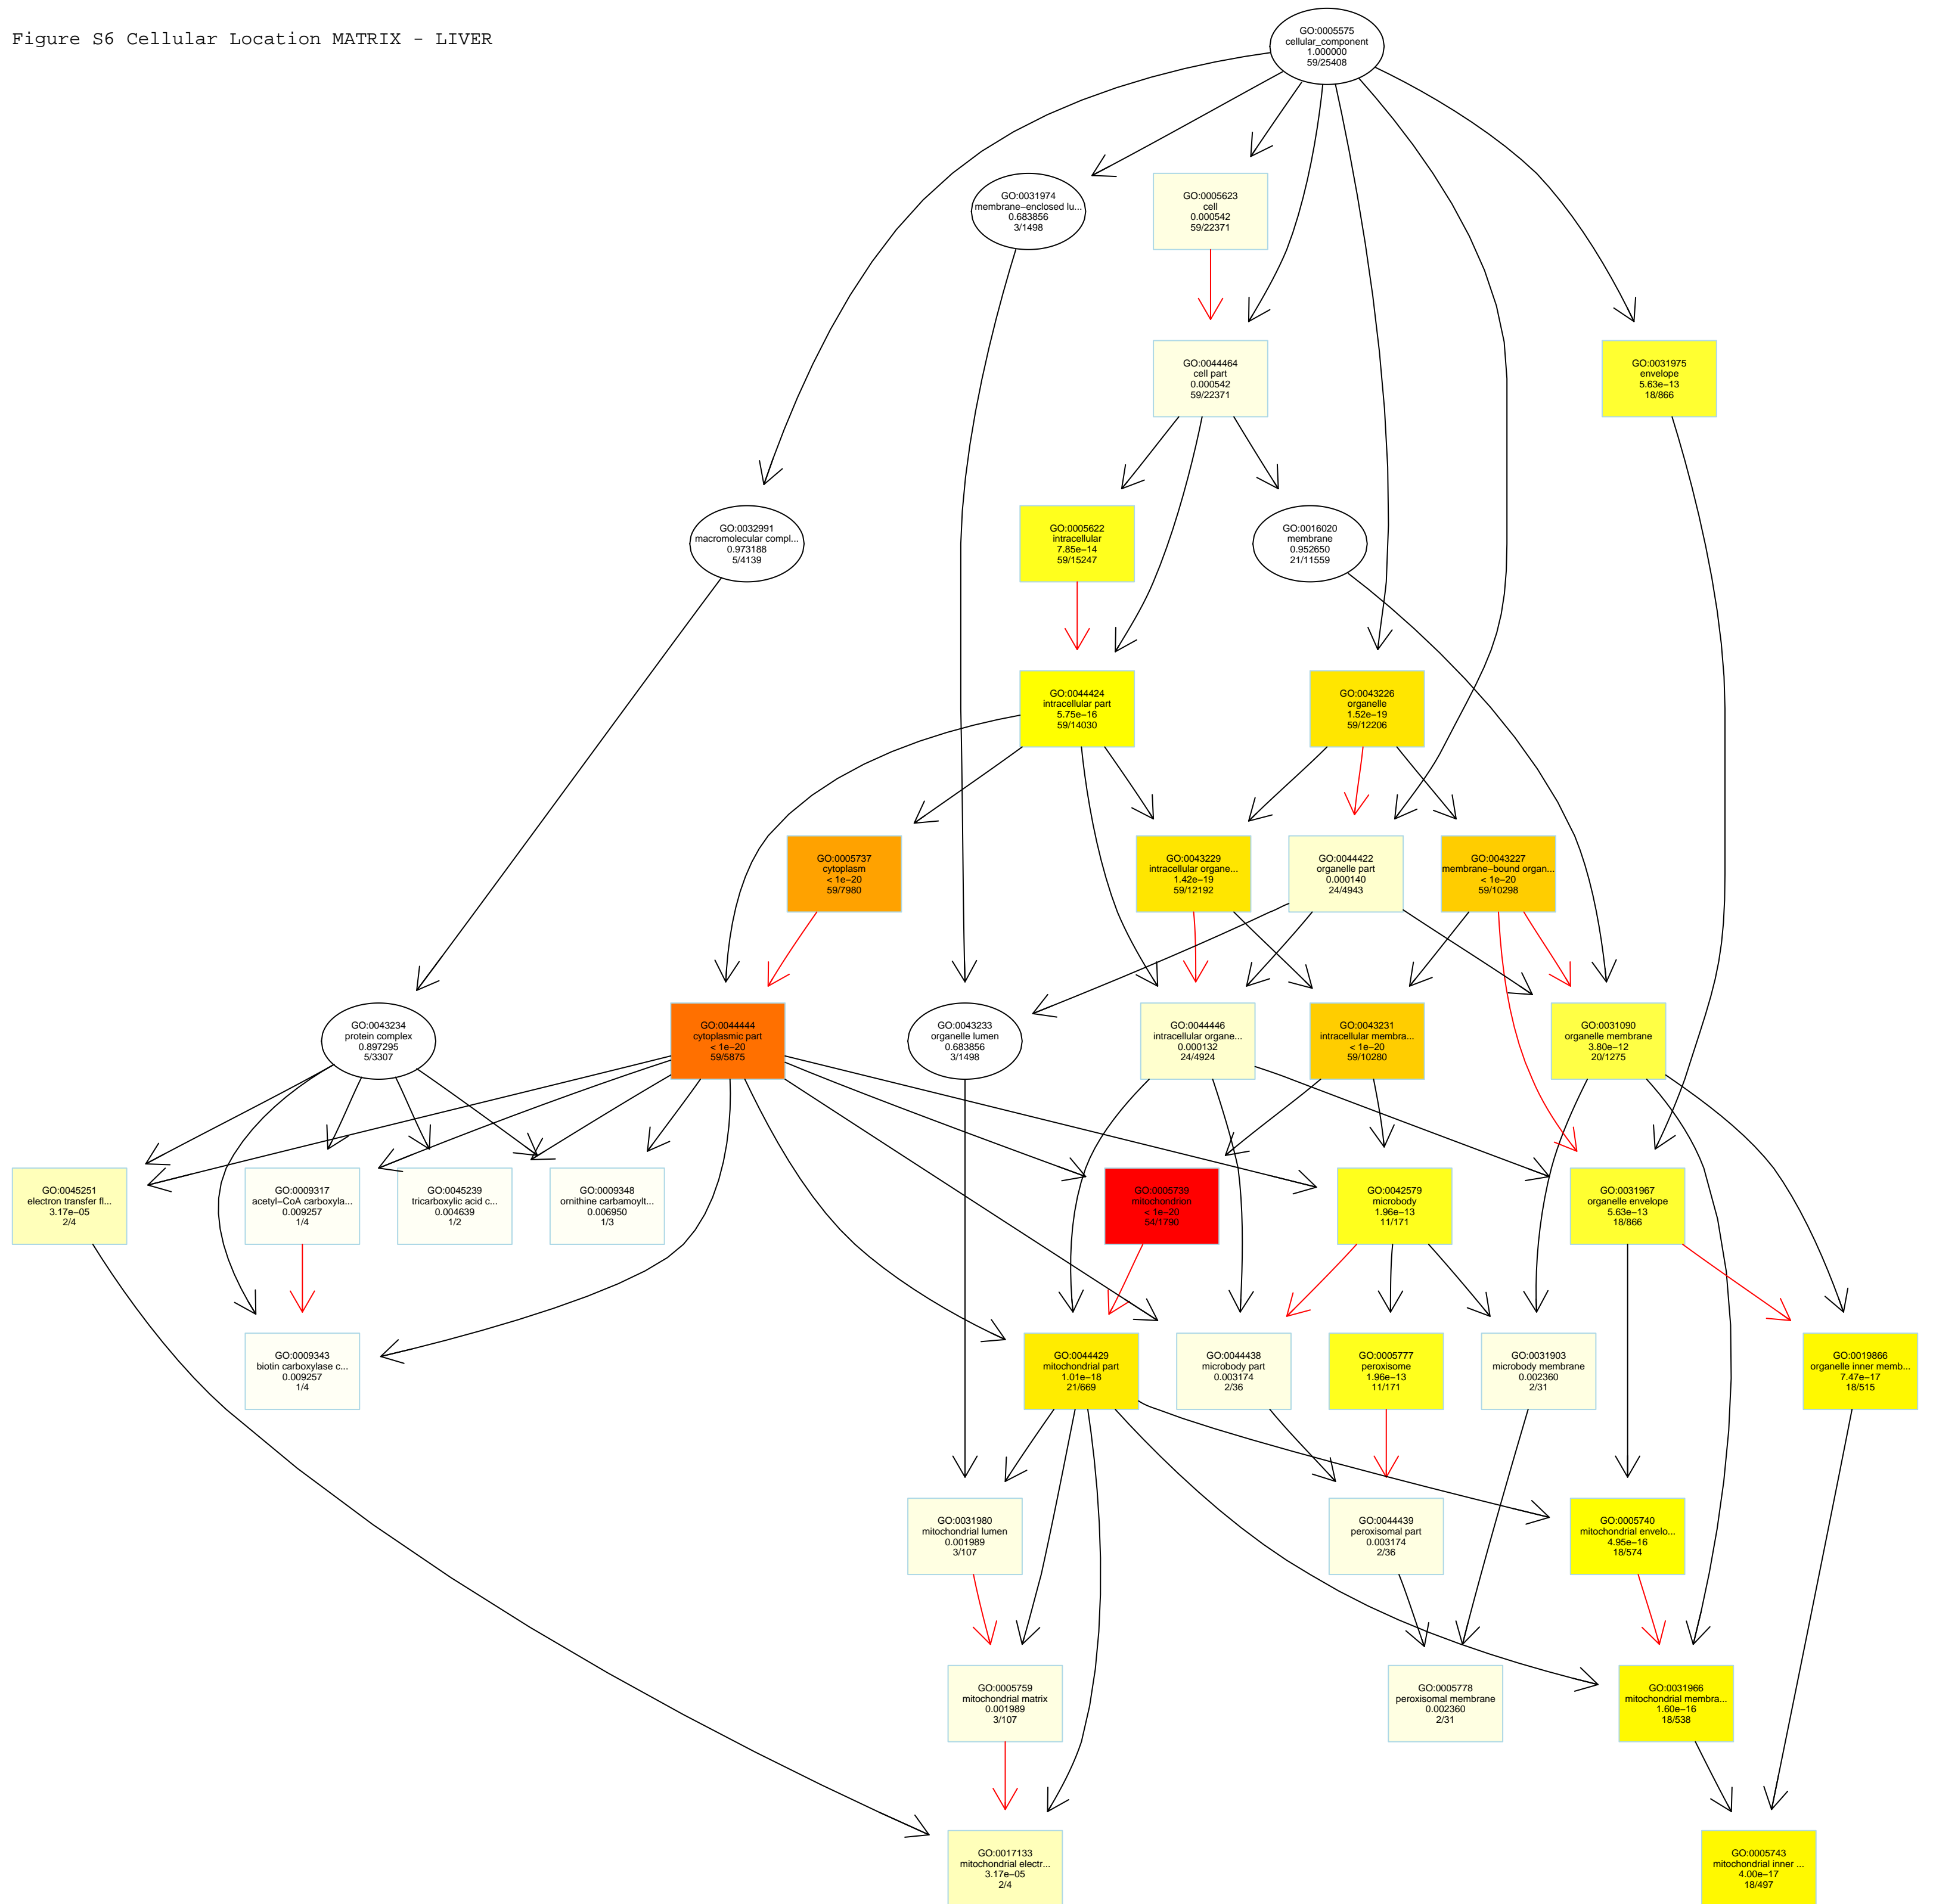

Figure S6 Molecular Function MATRIX - LIVER

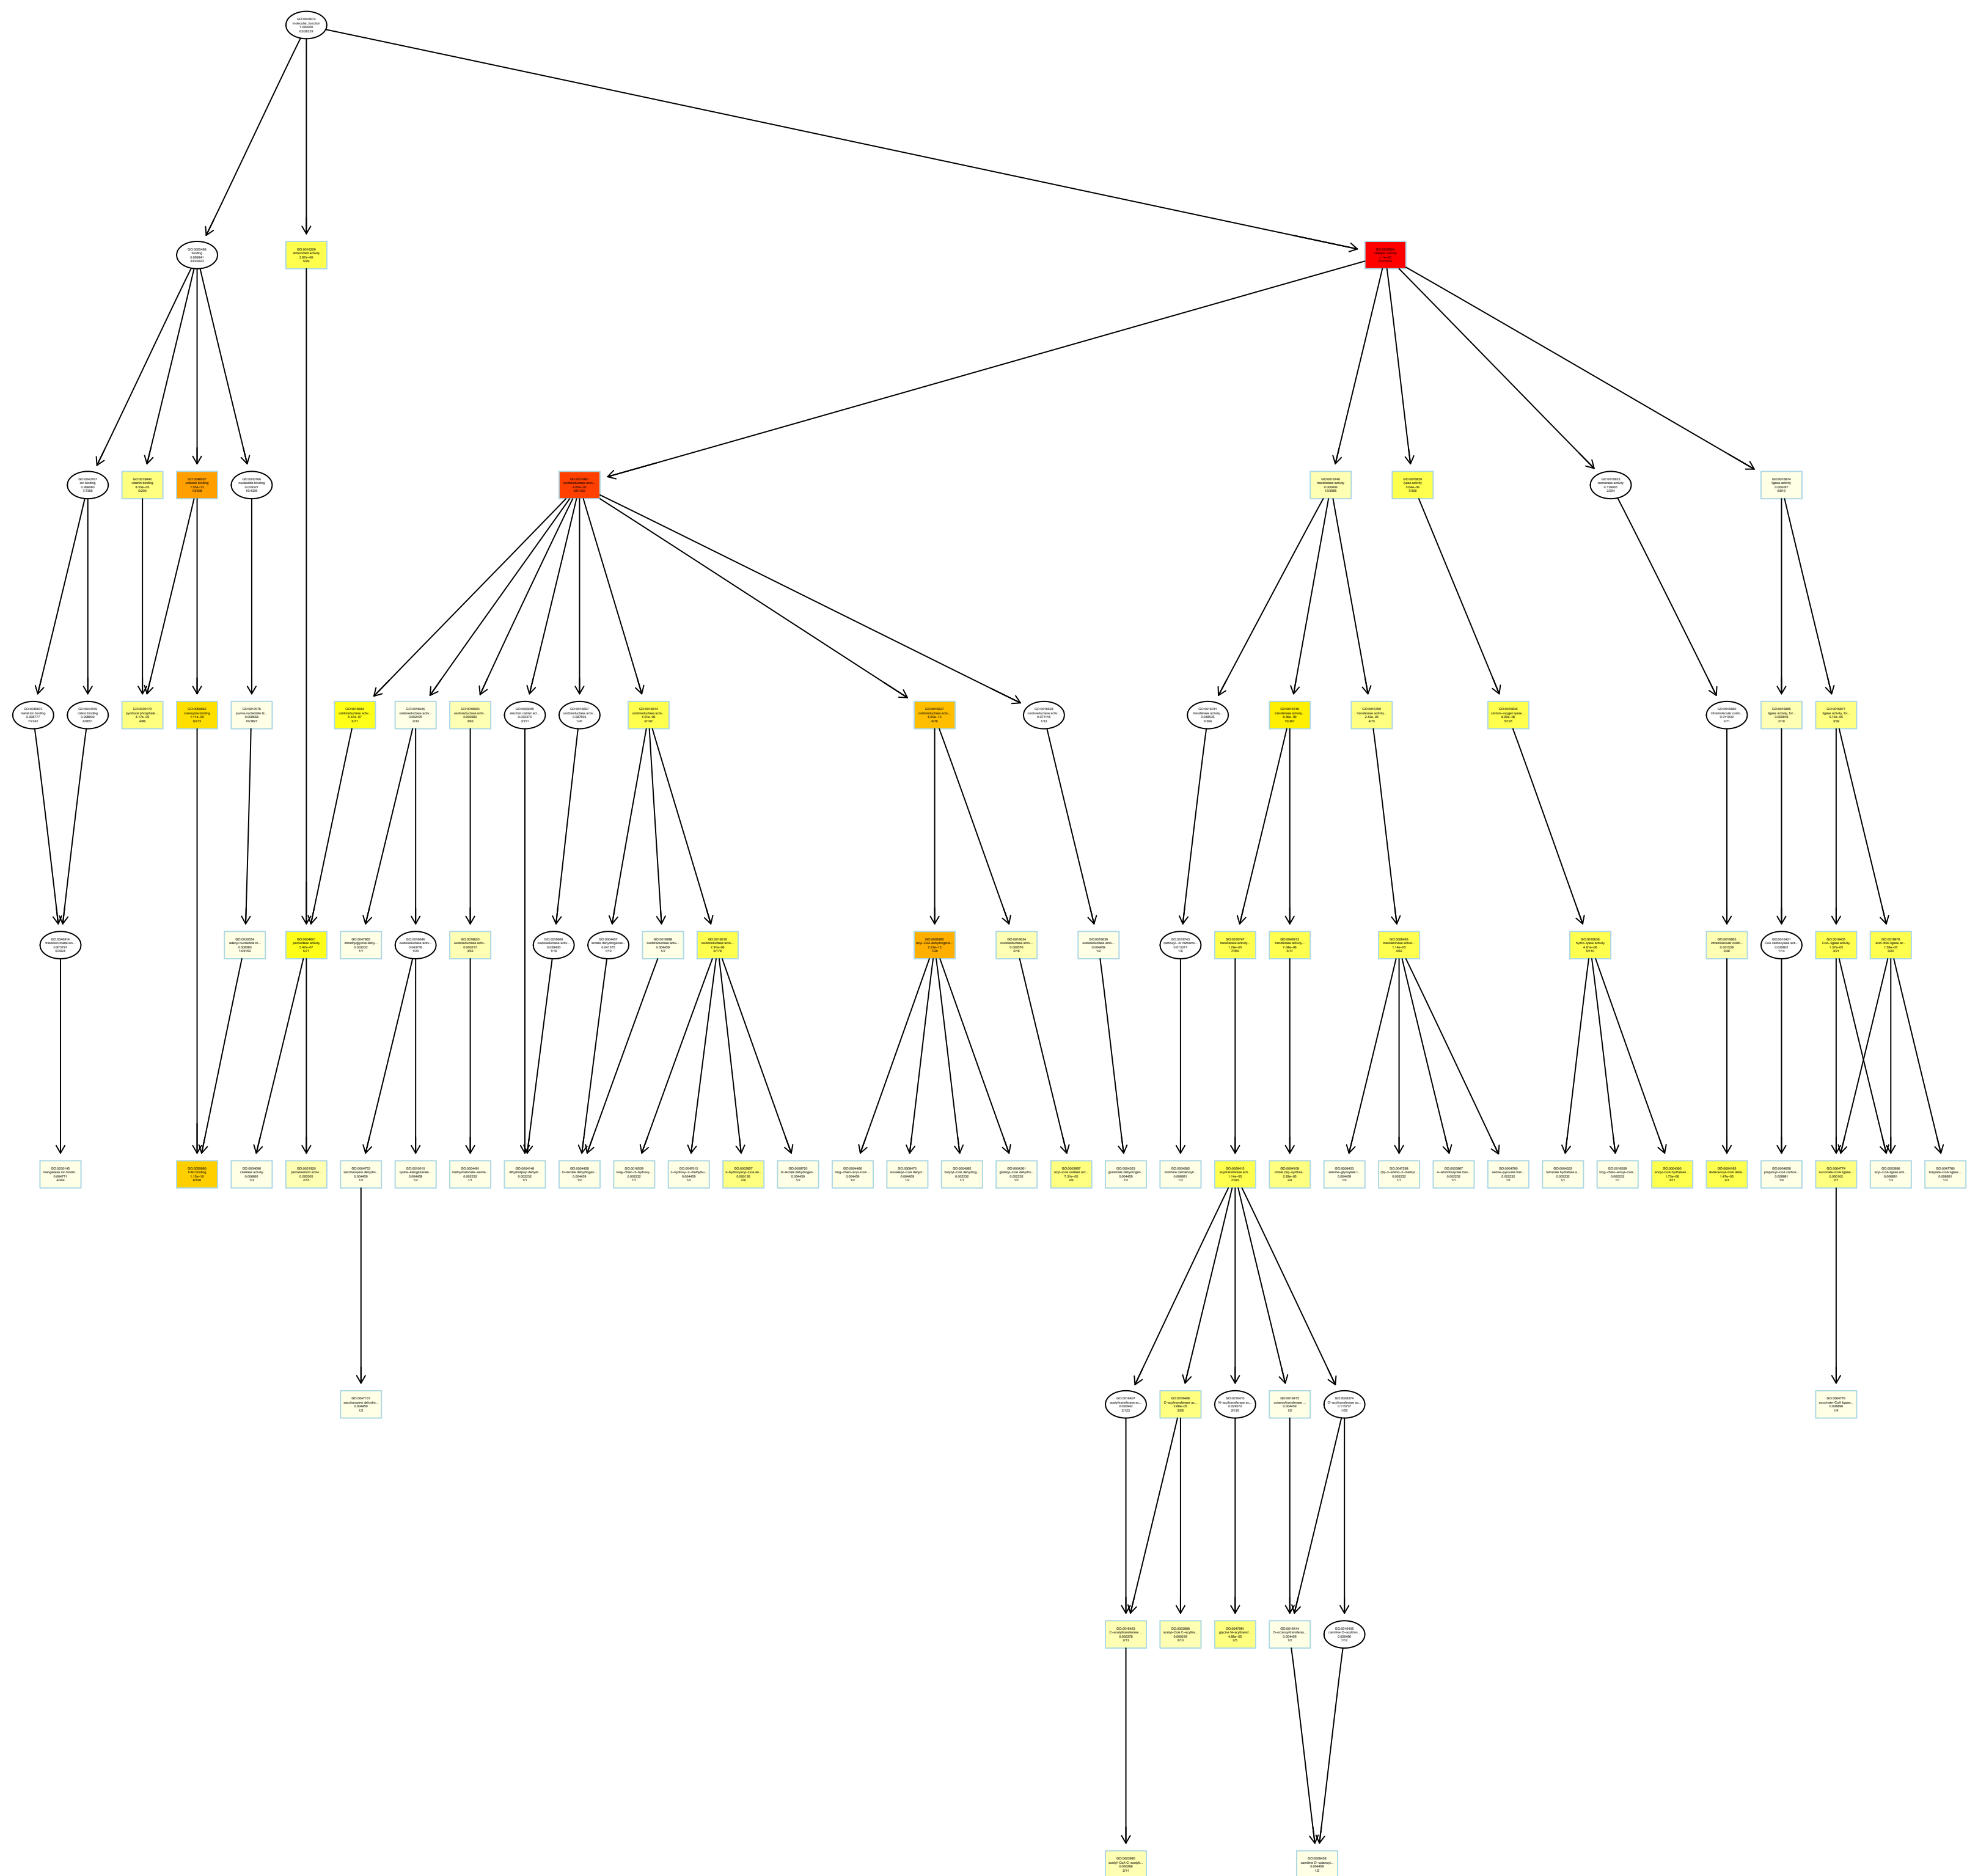



Figure S6 Biological Process MATRIX - LIVER

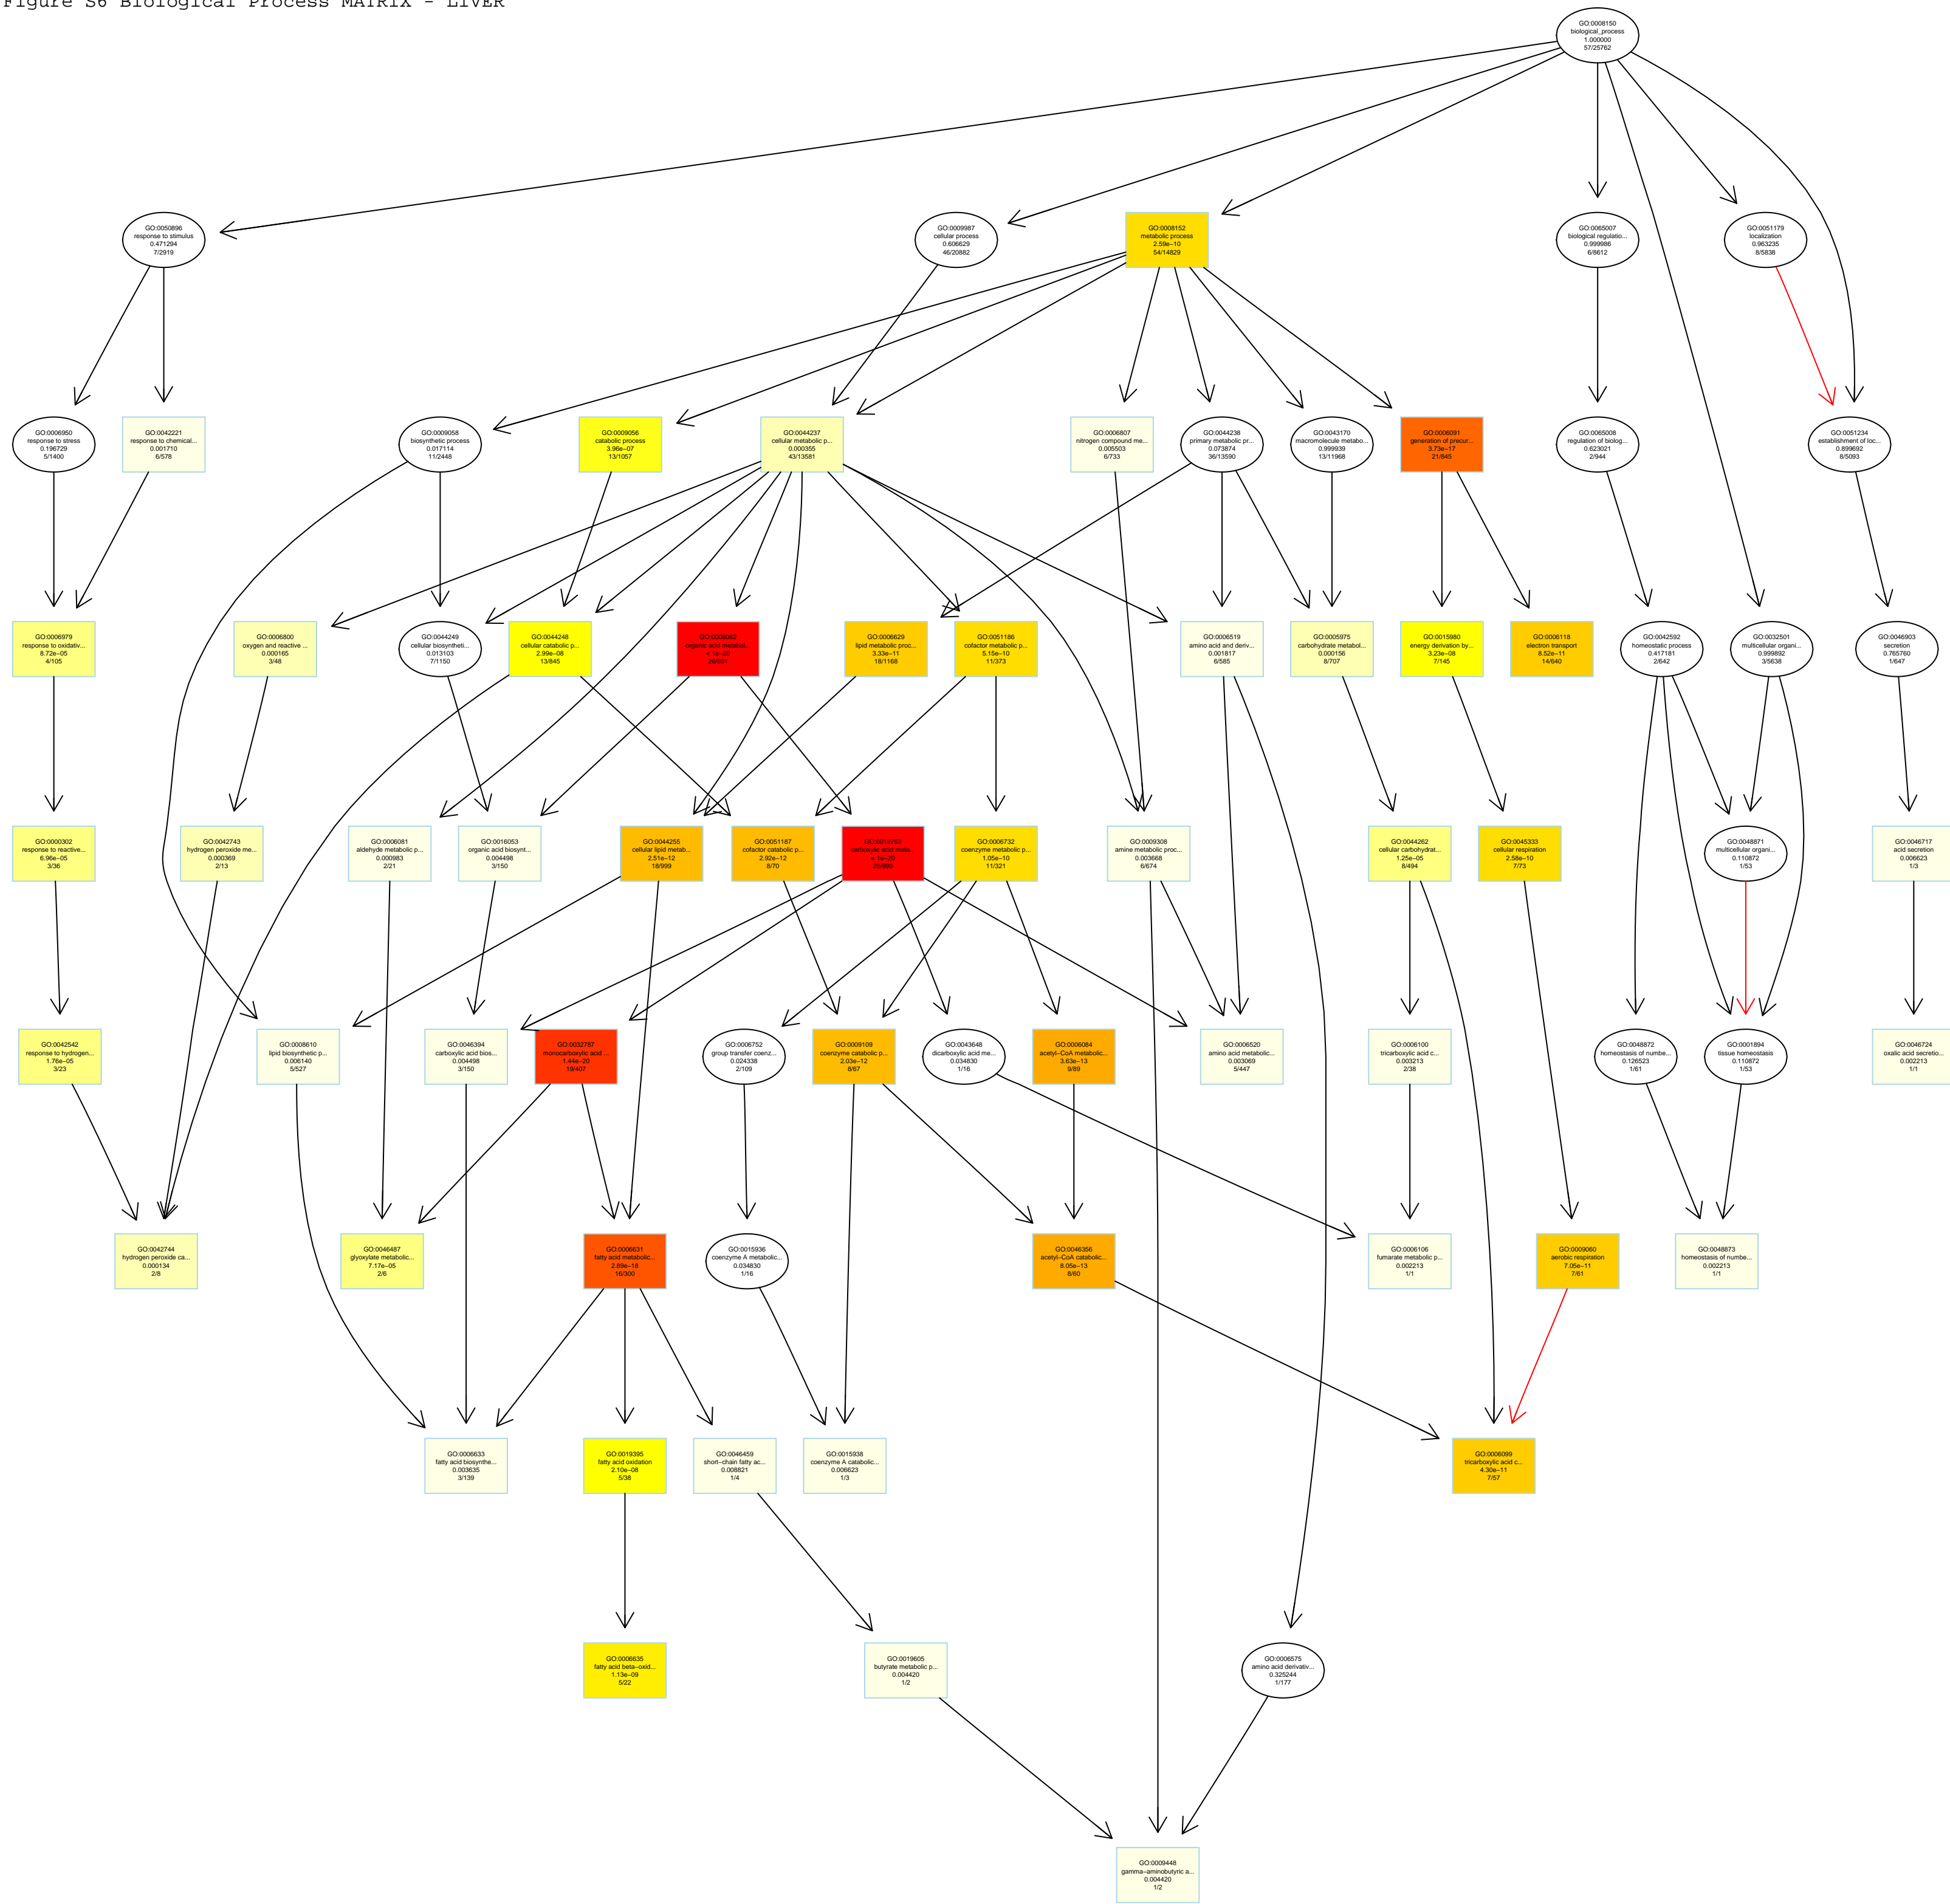

Figure S7 Cellular Location MEMBRANE - LIVER

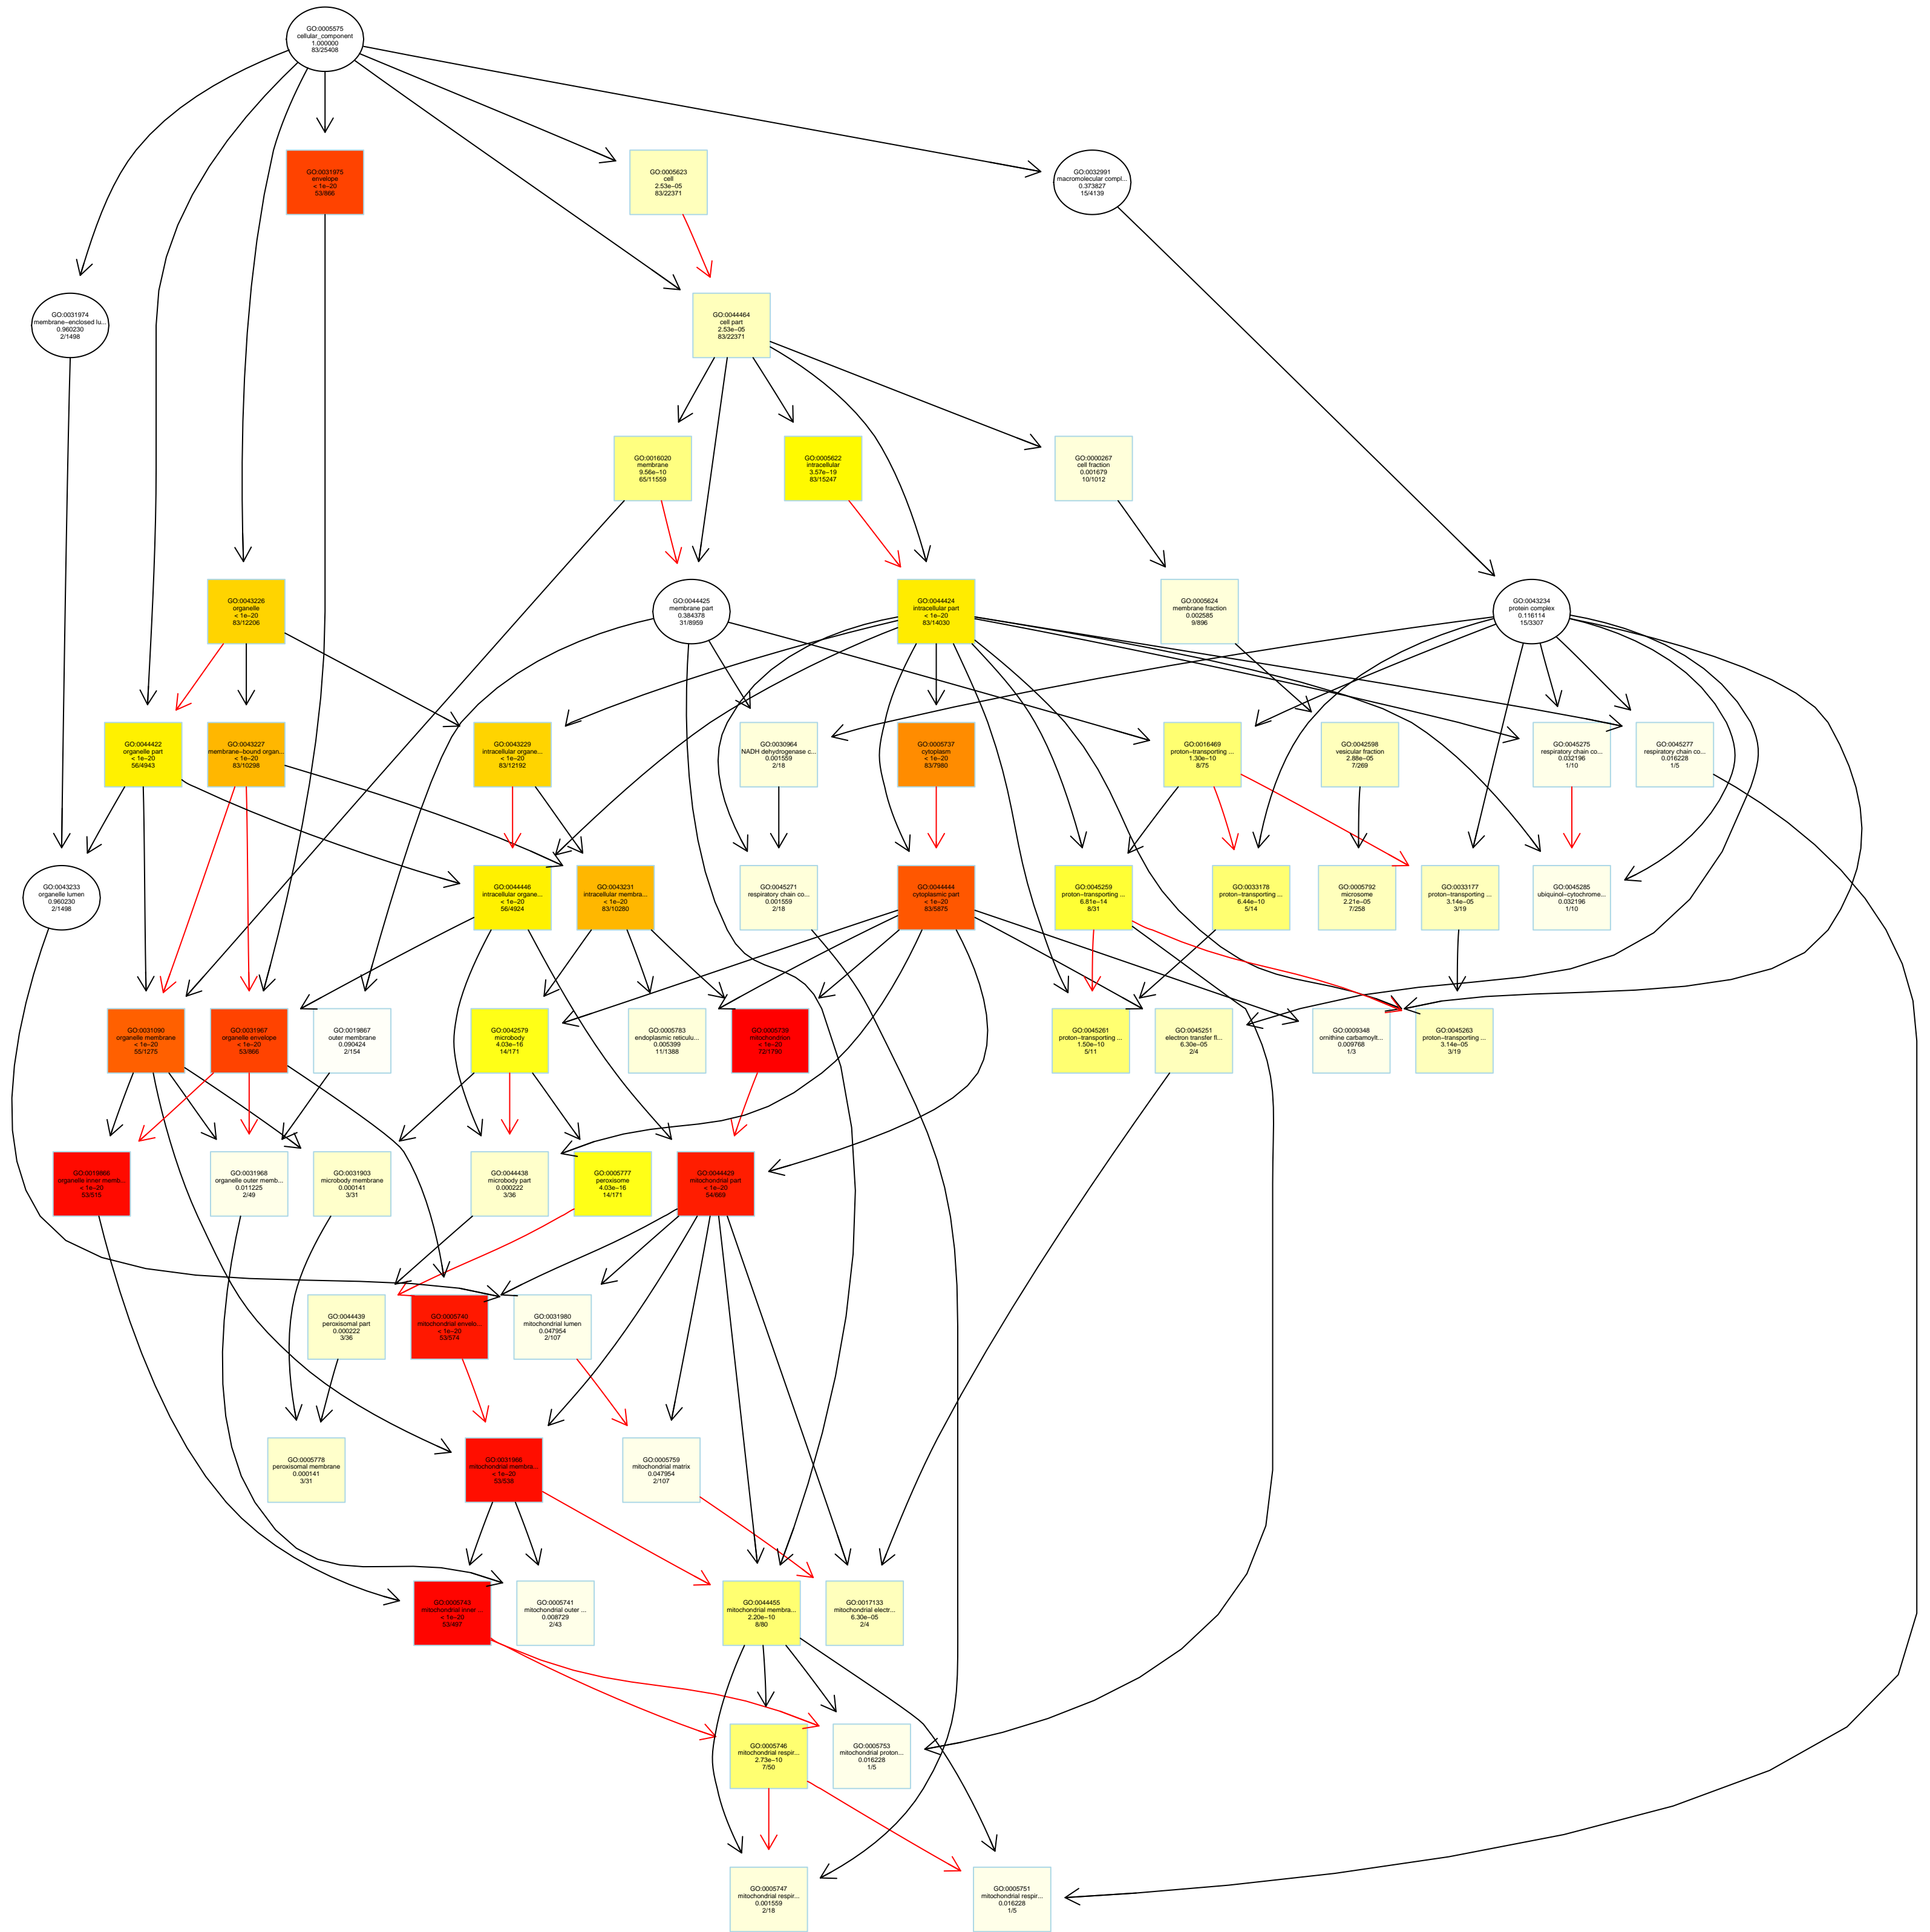

Figure S7 Molecular Function MEMBRANE - LIVER

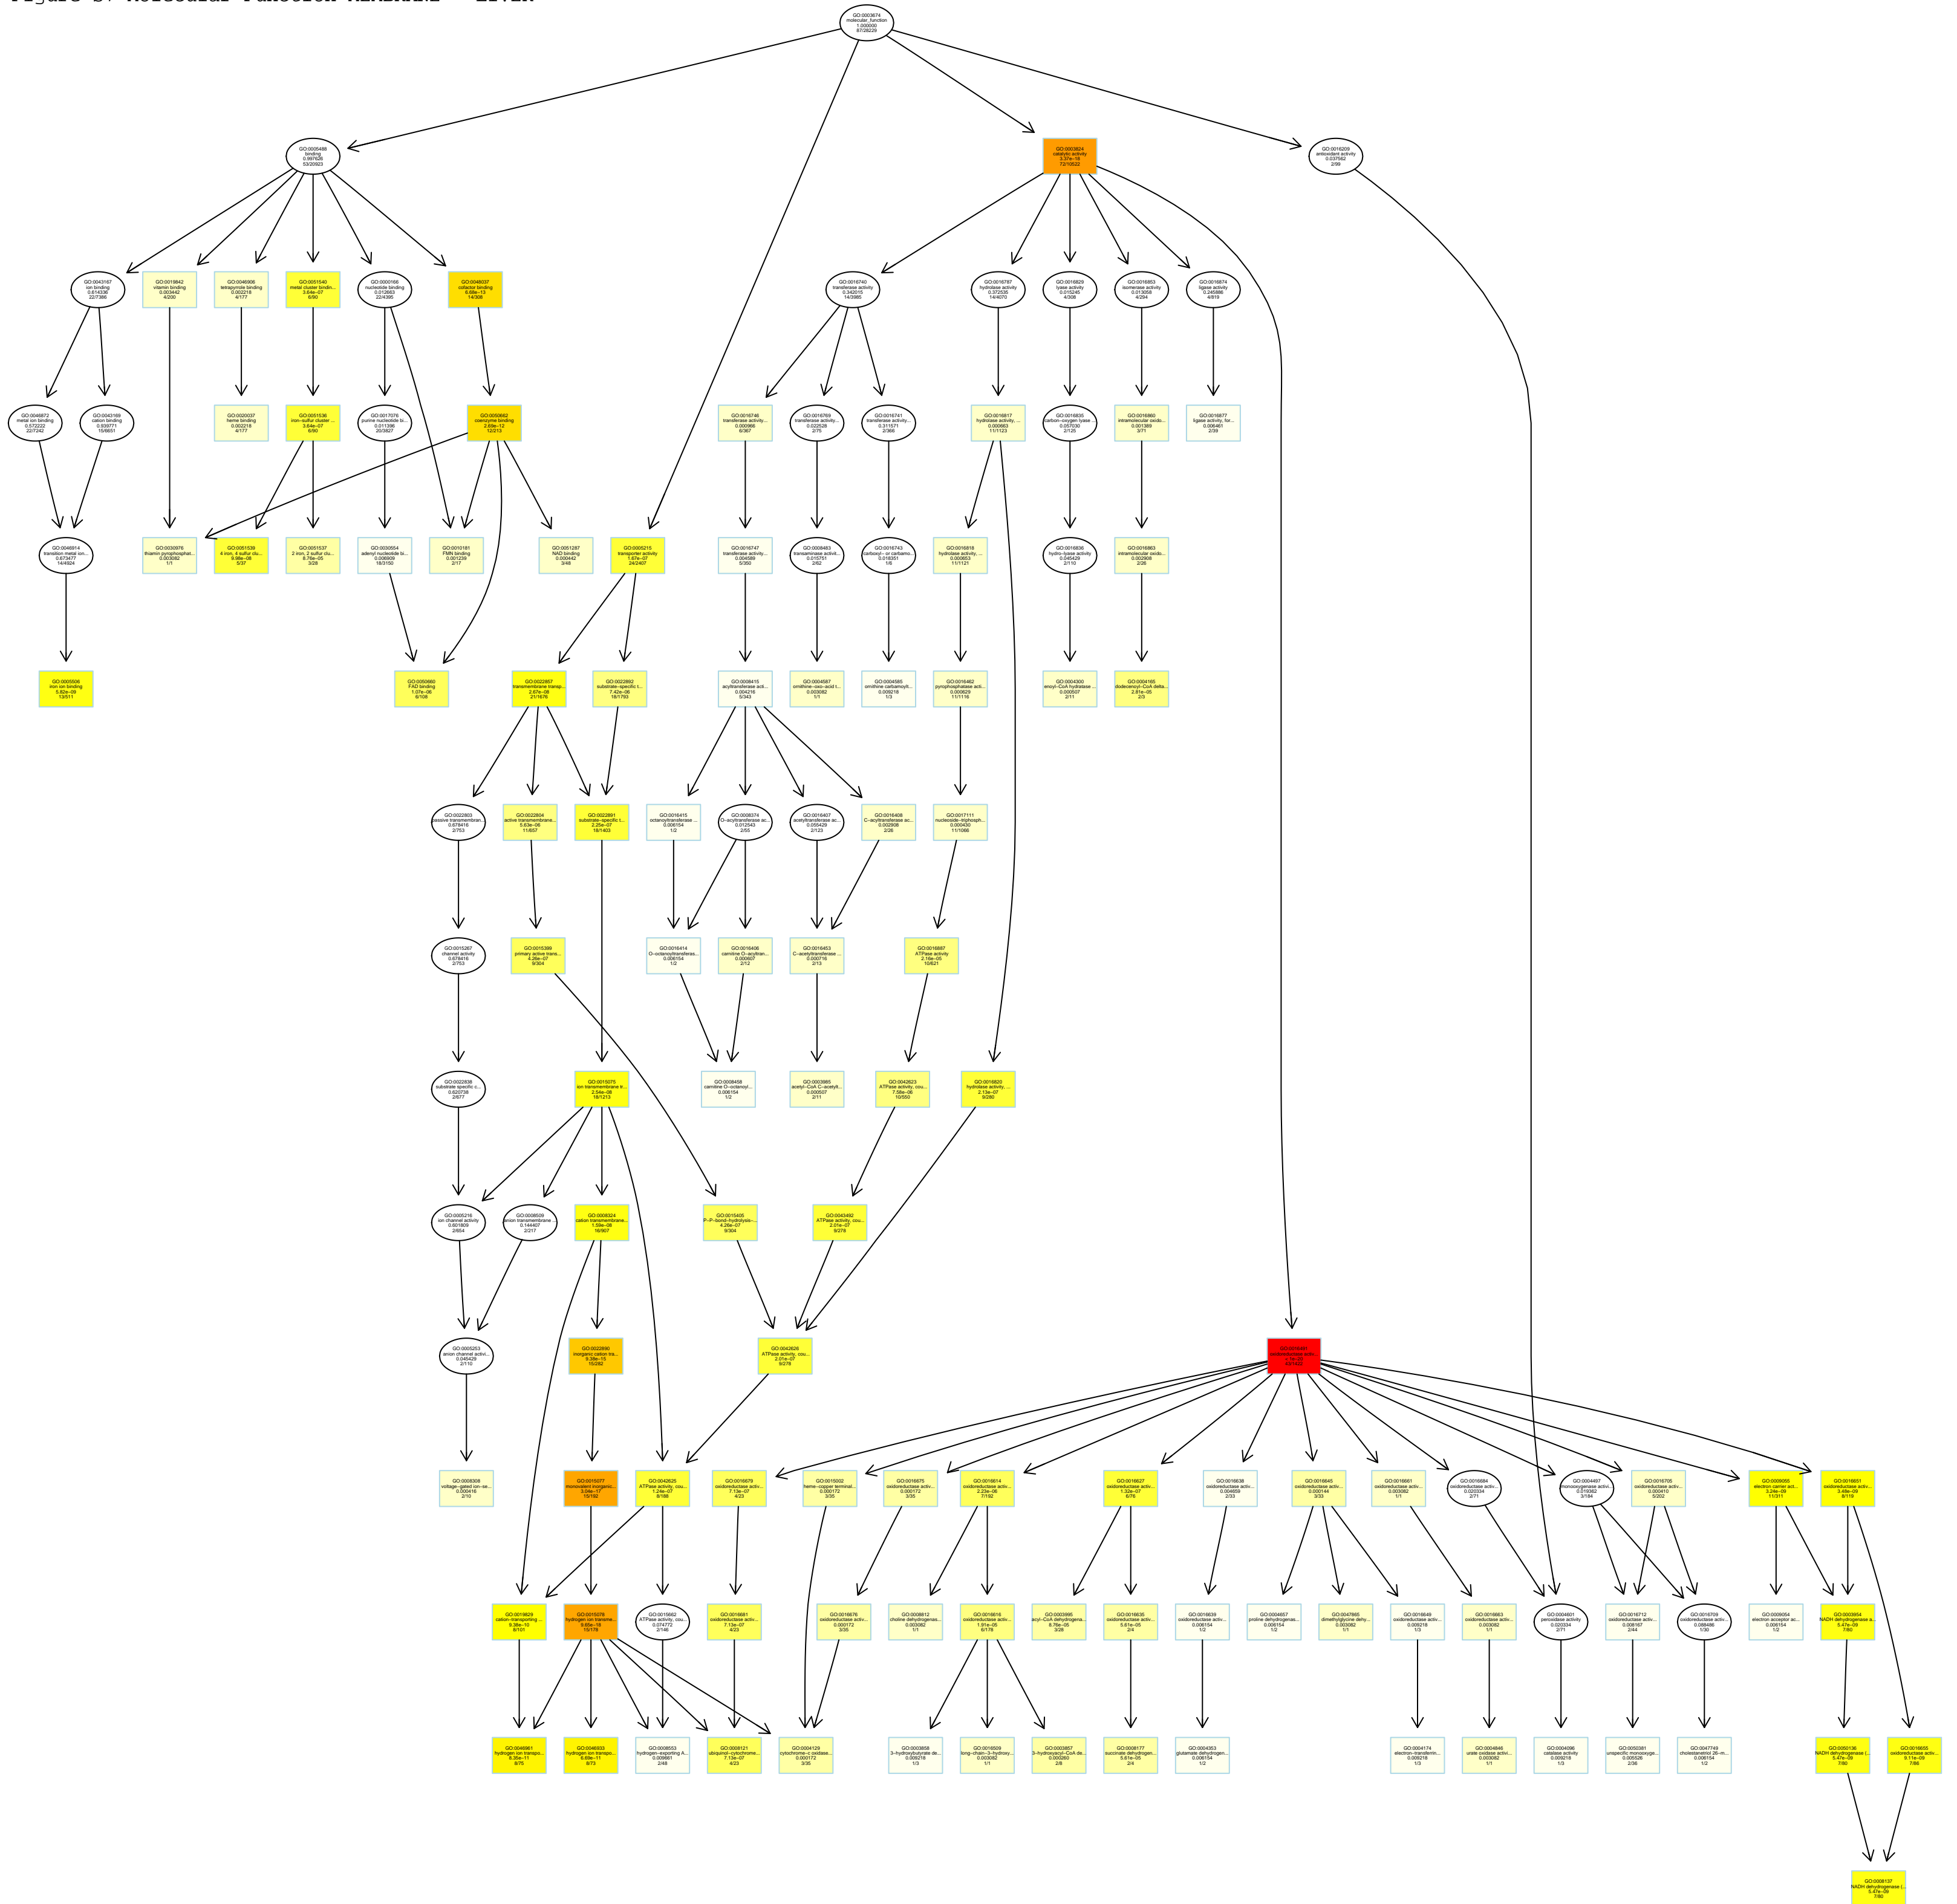

Figure S7 Biological Process MEMBRANE - LIVER

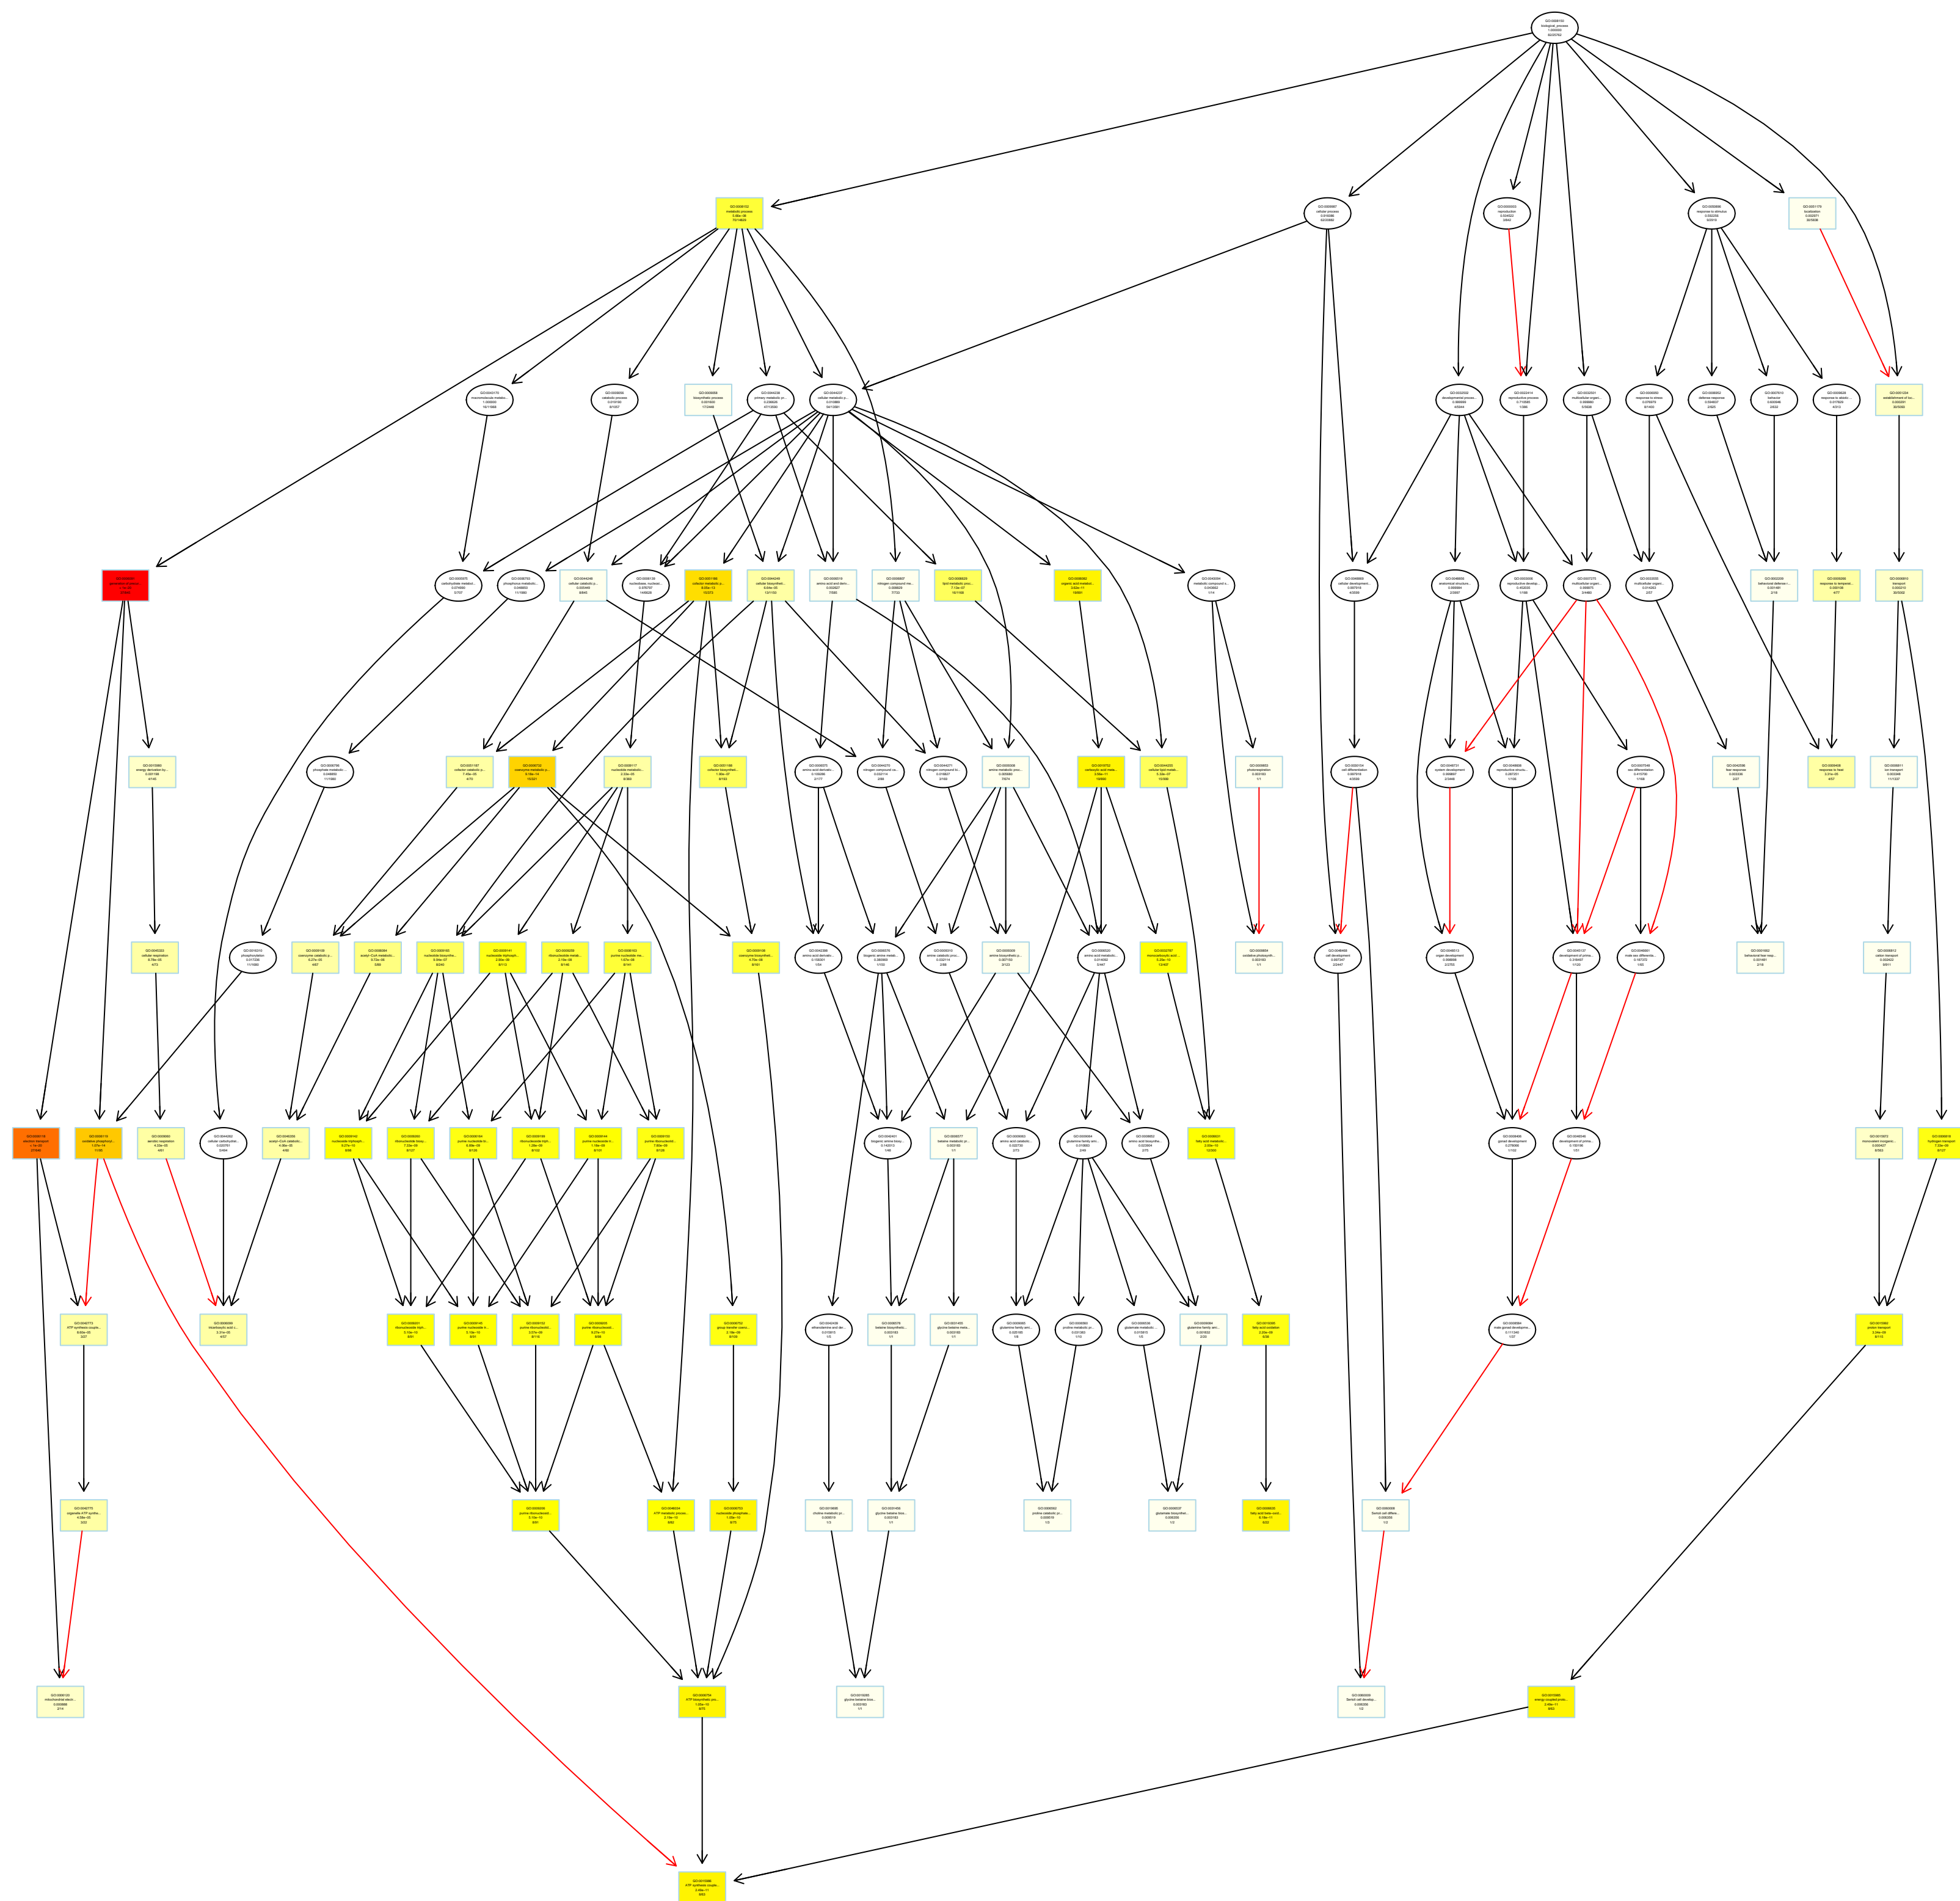

Figure S8 Cellular Location MATRIX - BRAIN

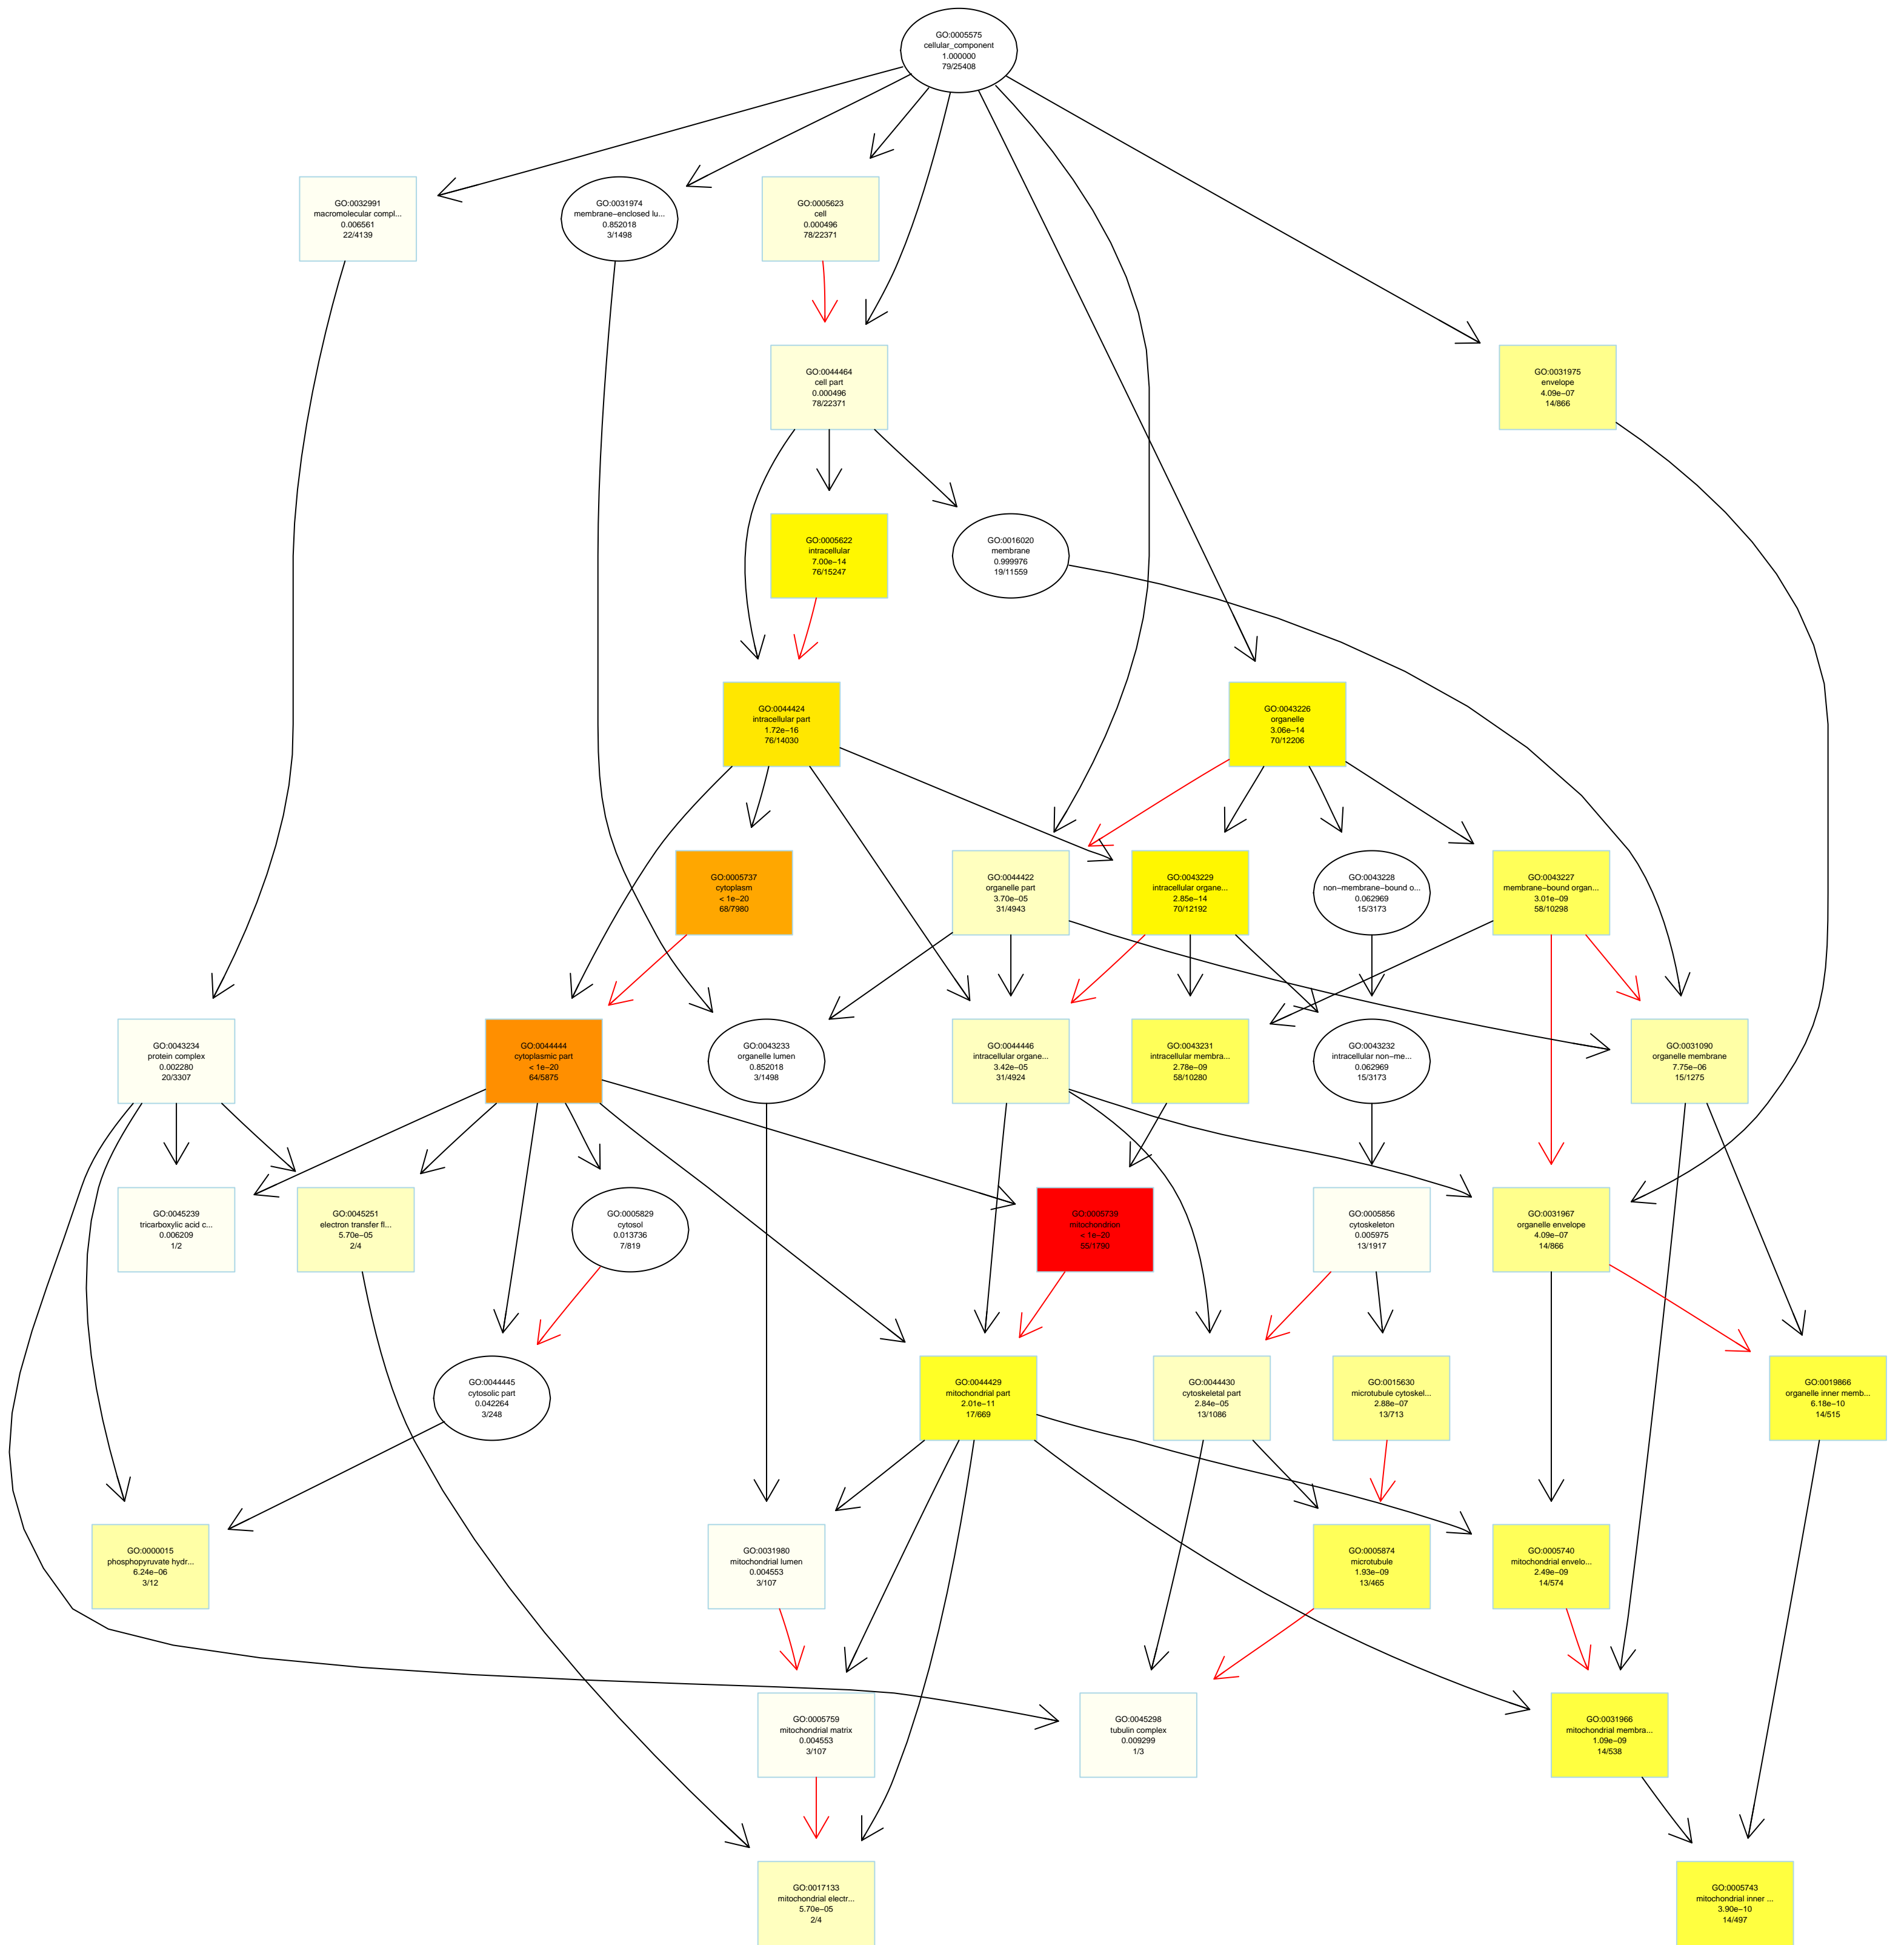



Figure S8 Biological Process MATRIX - BRAIN

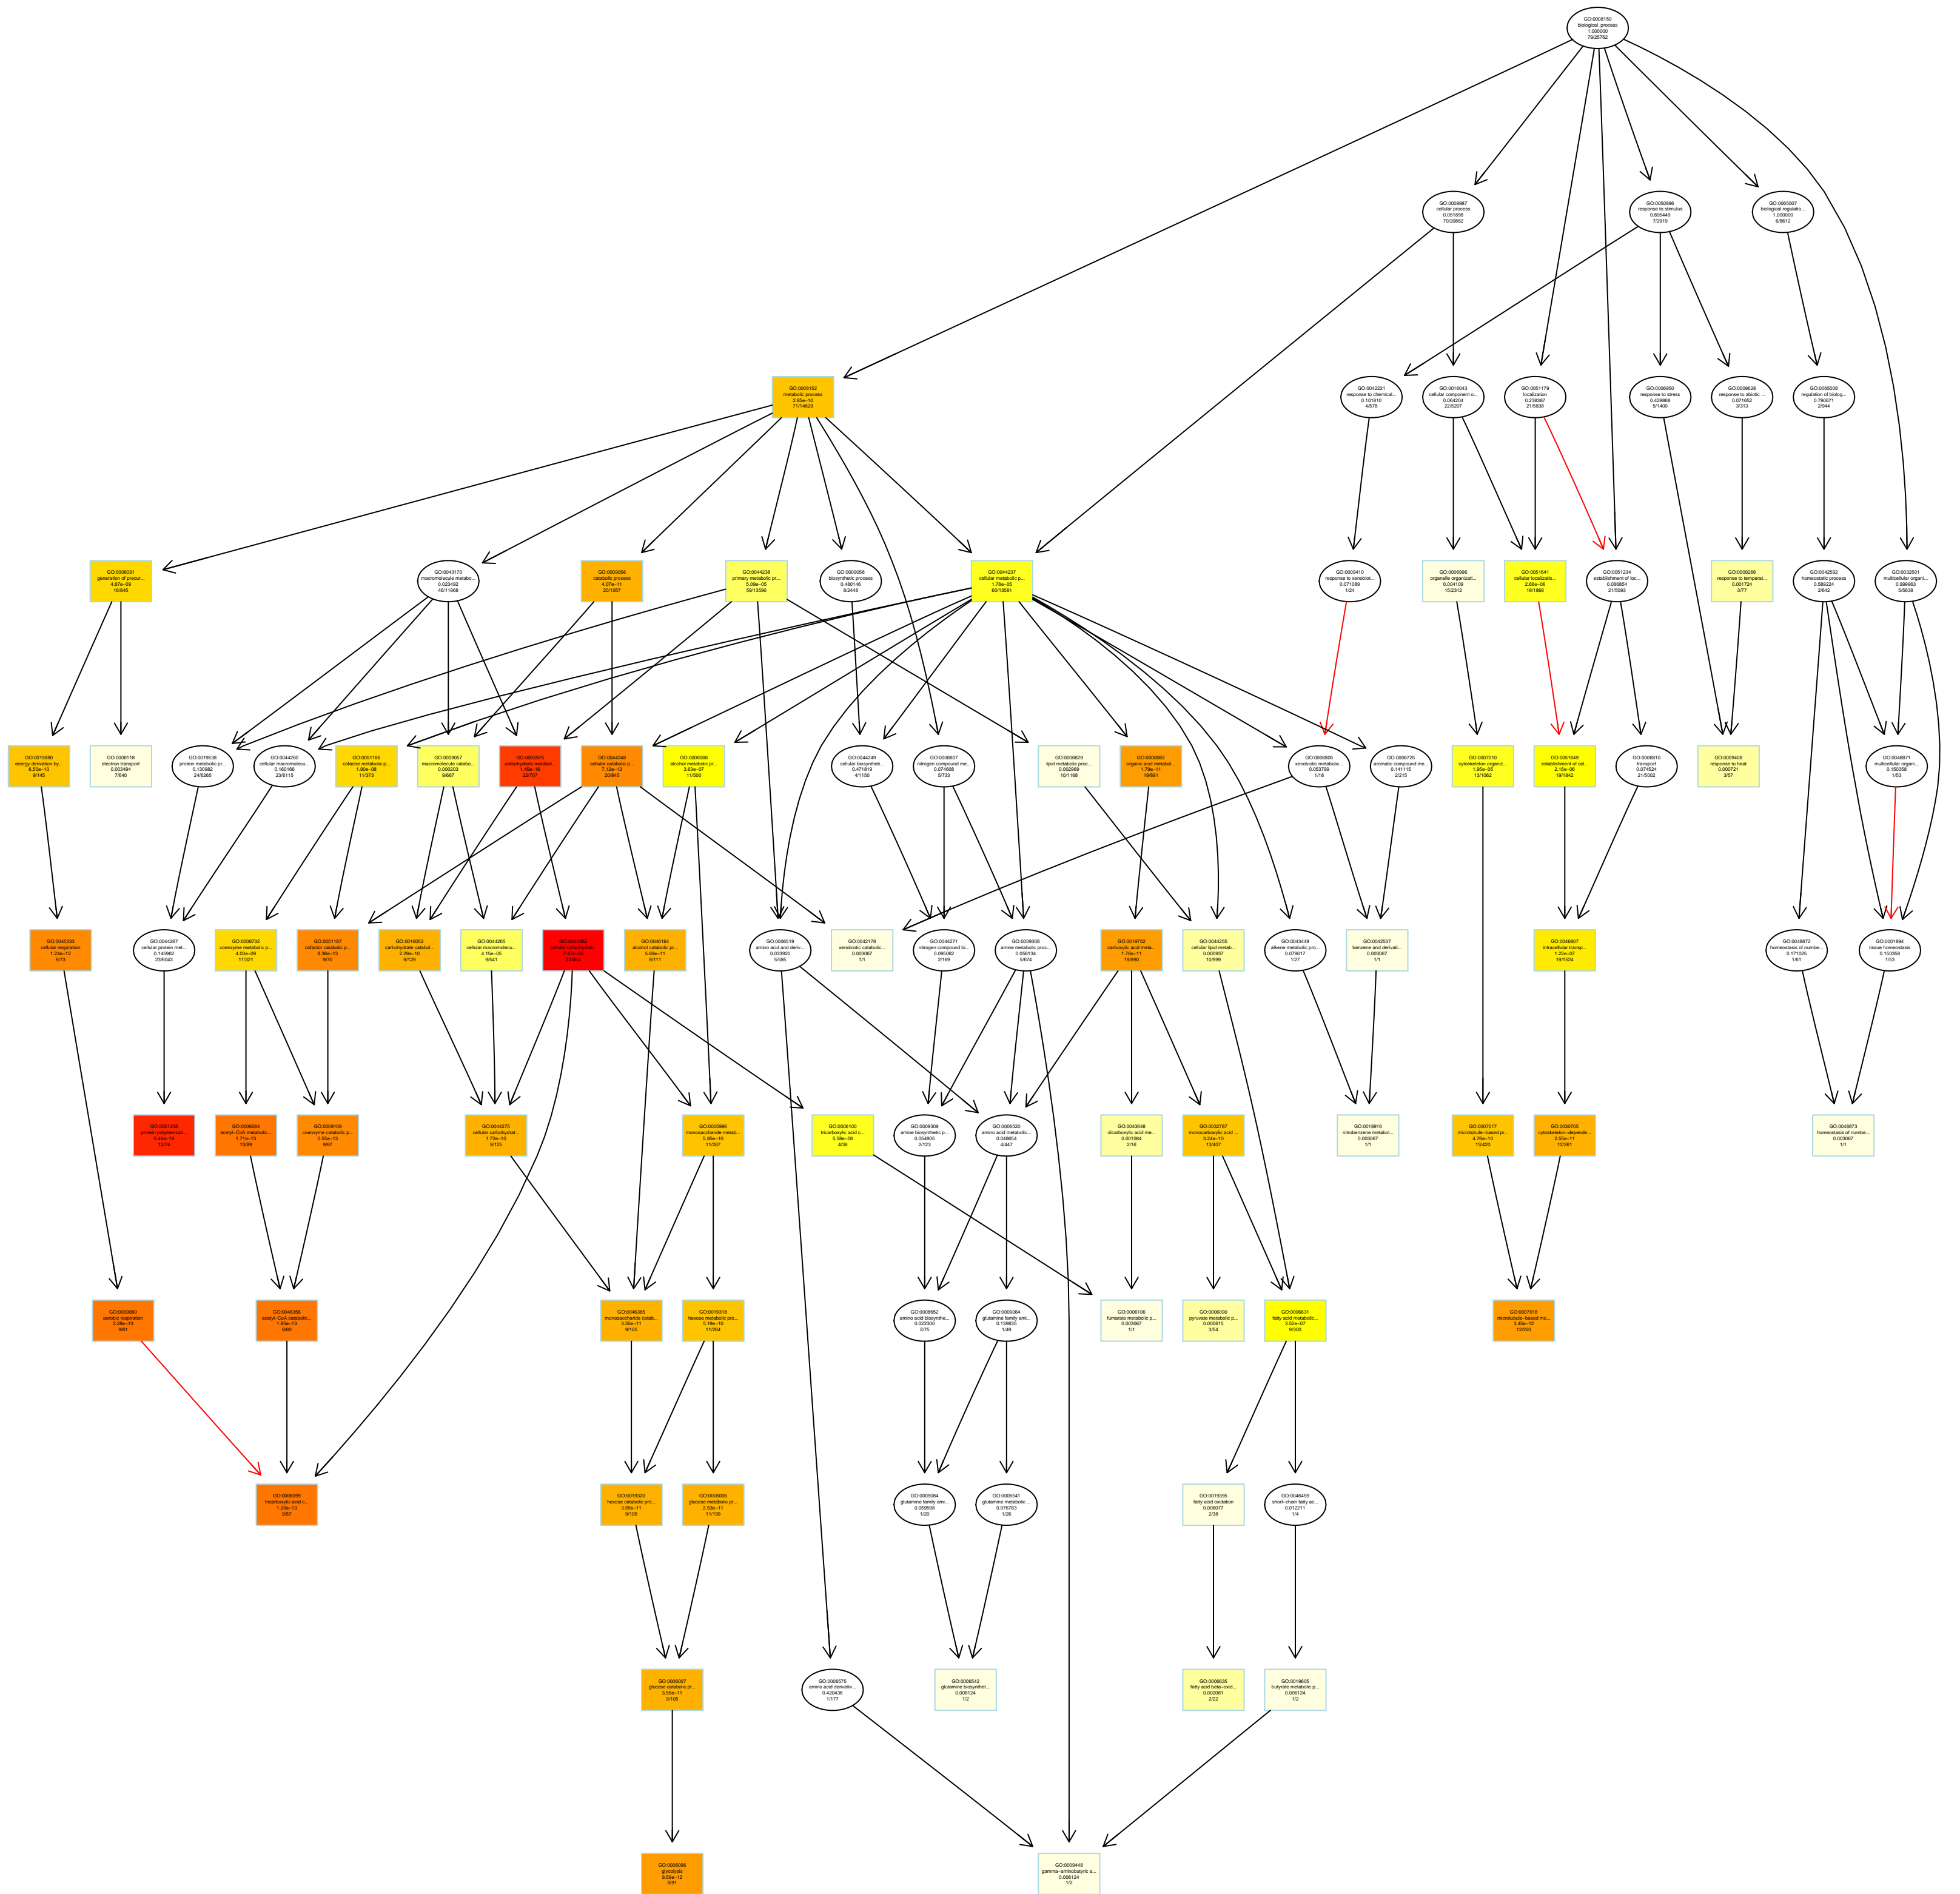

Figure S9 Cellular Location MEMBRANE - BRAIN

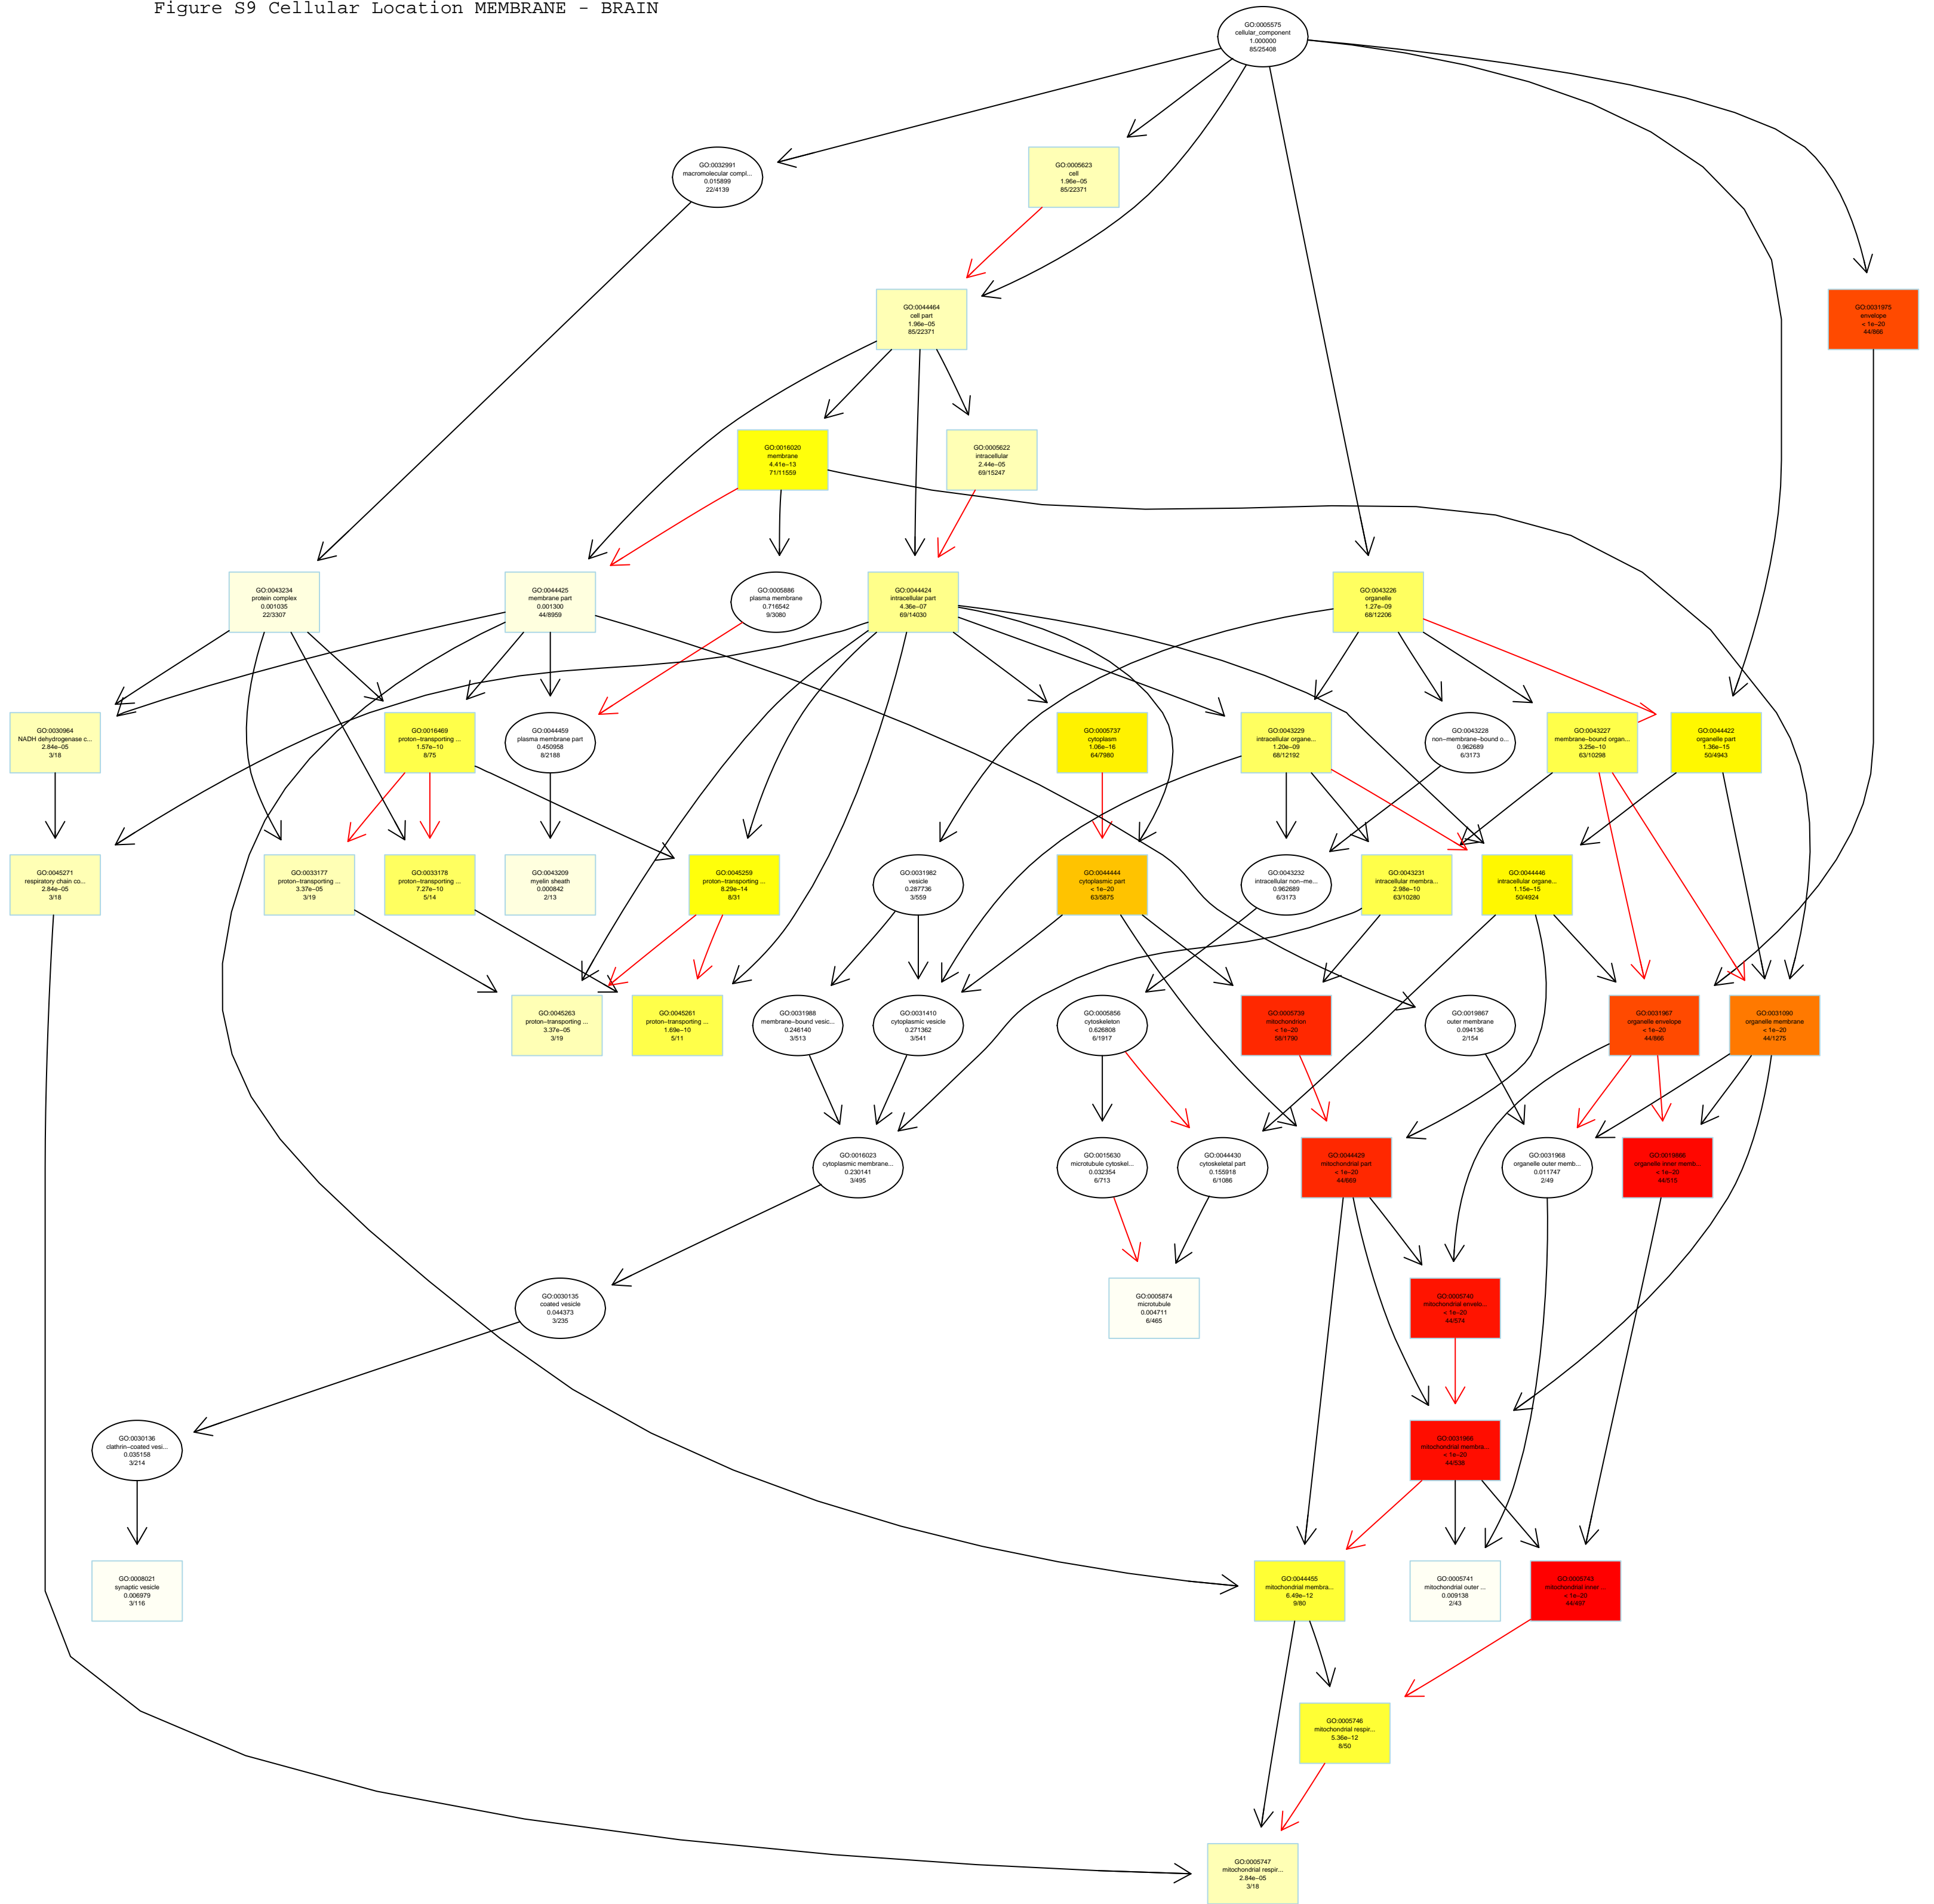



Figure S9 Molecular Function MEMBRANE - BRAIN

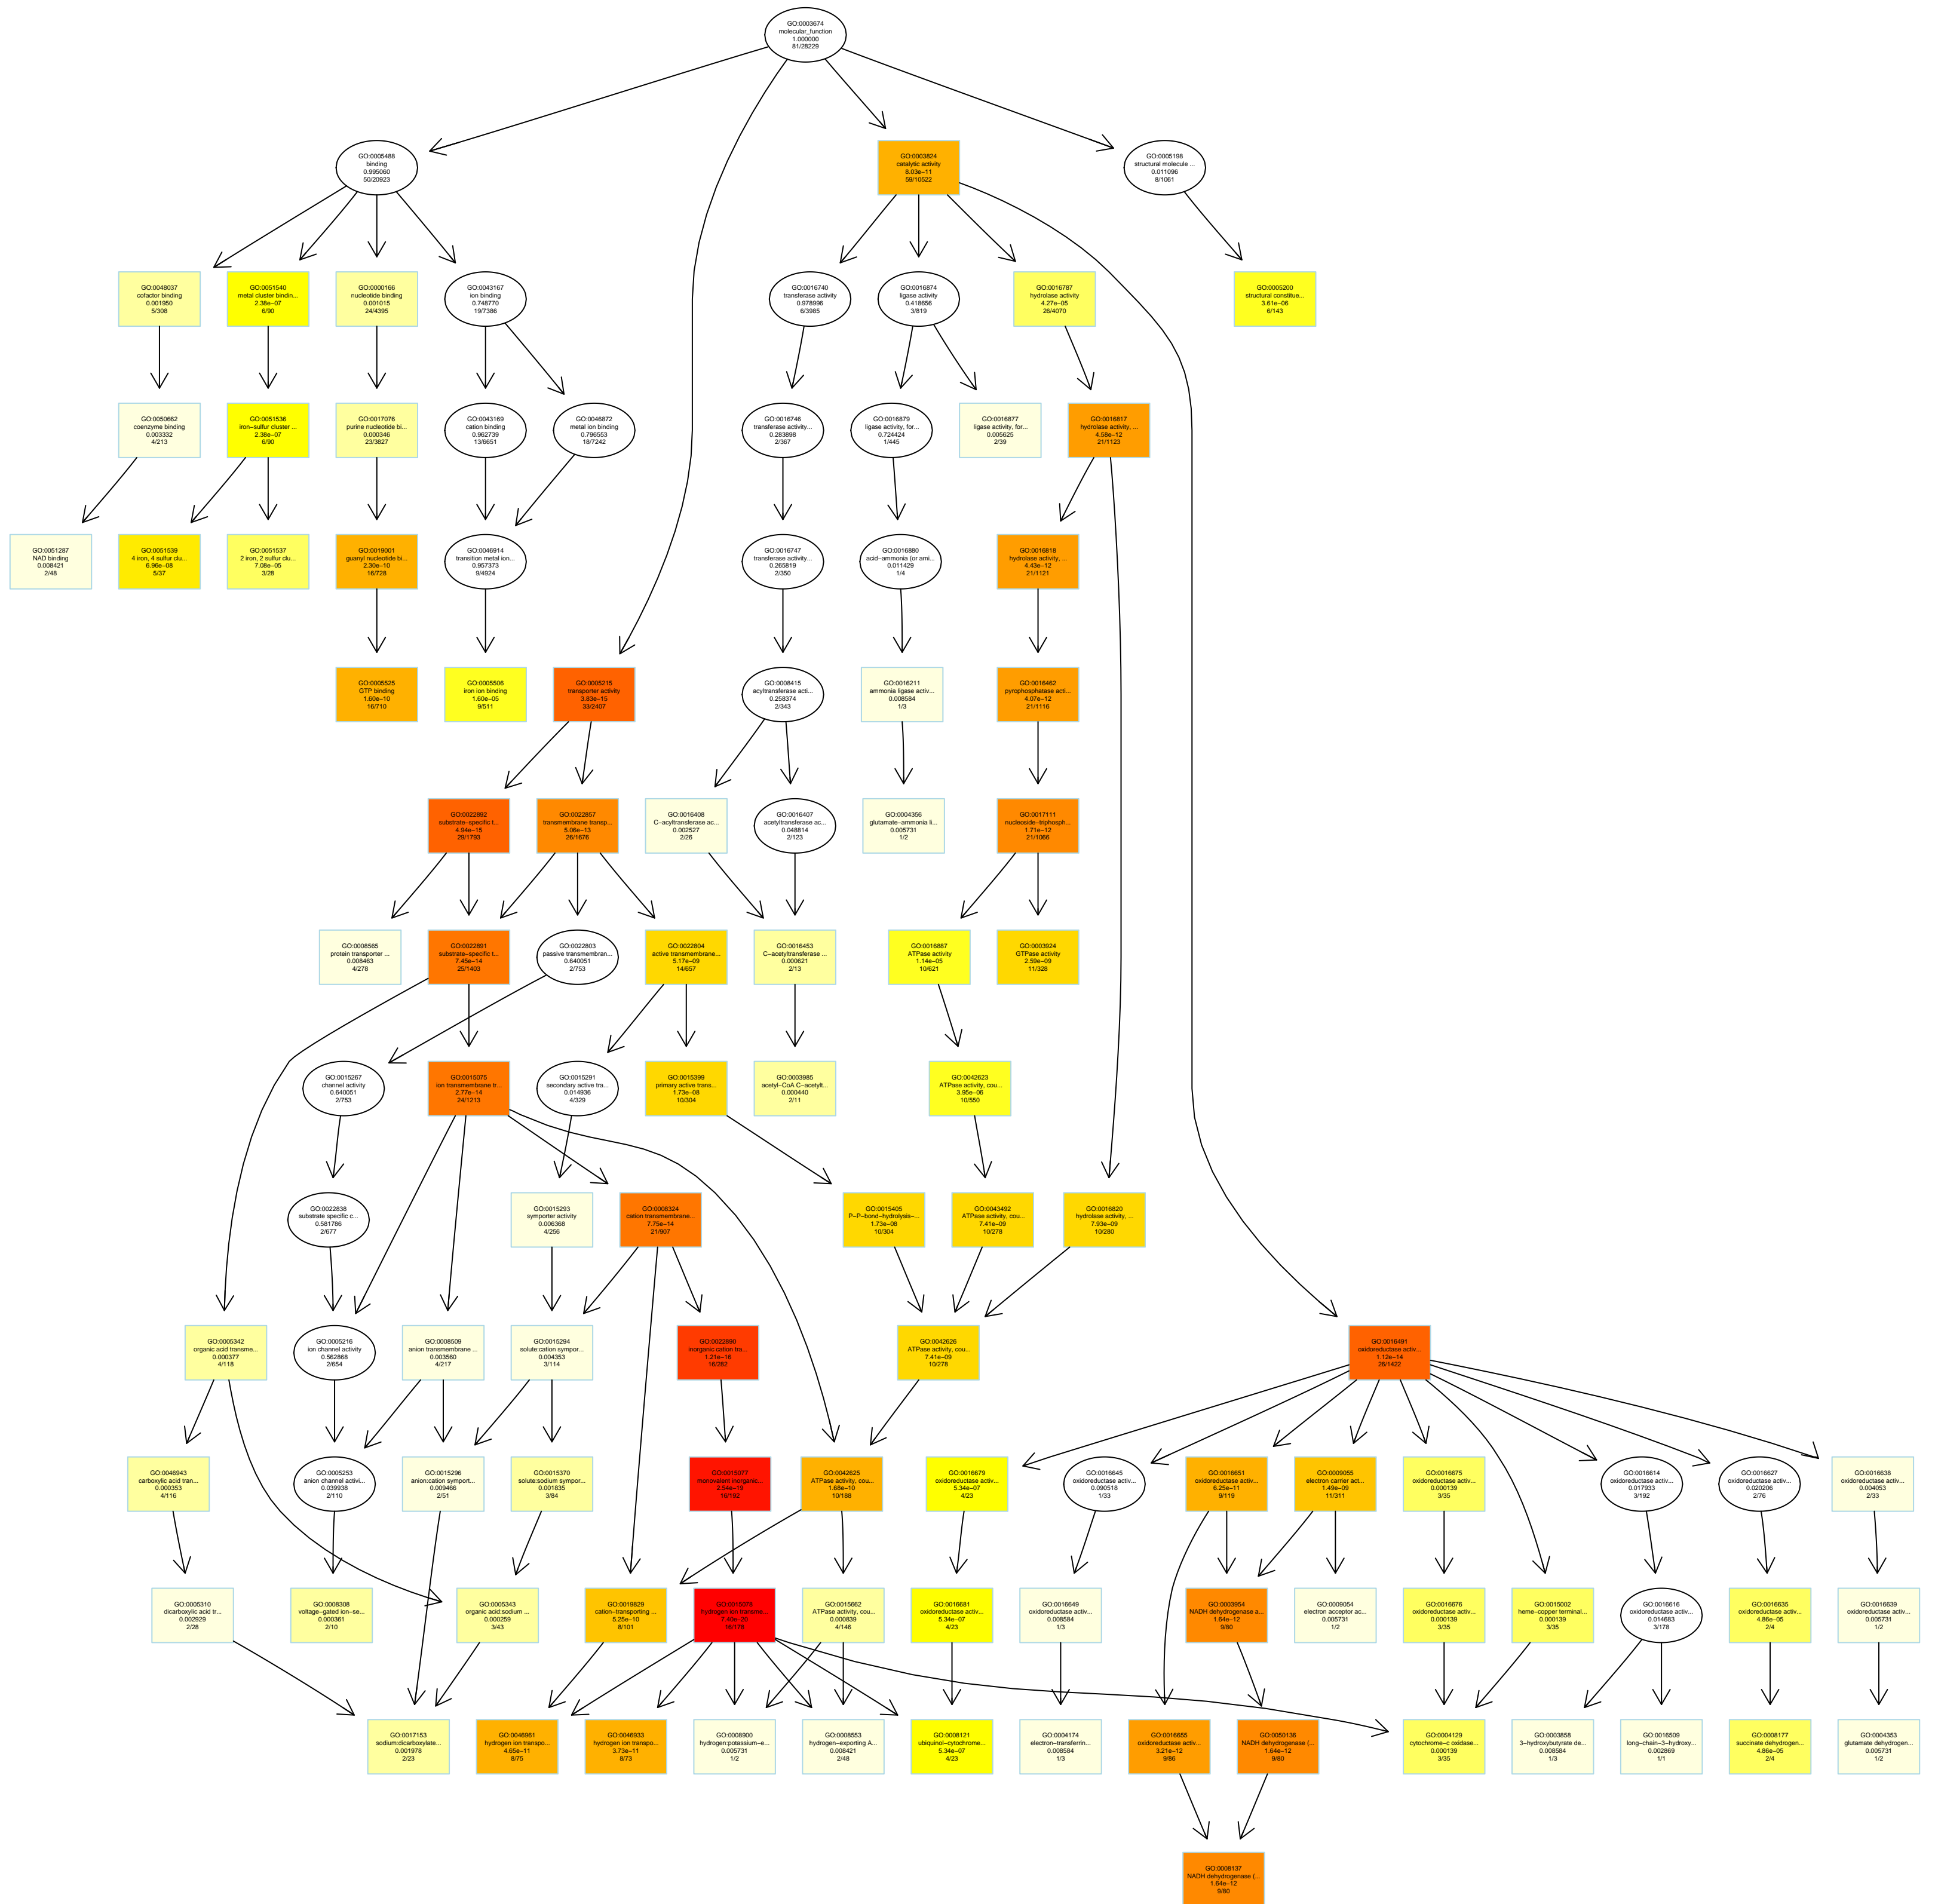

Figure S9 Biological Process MEMBRANE - BRAIN

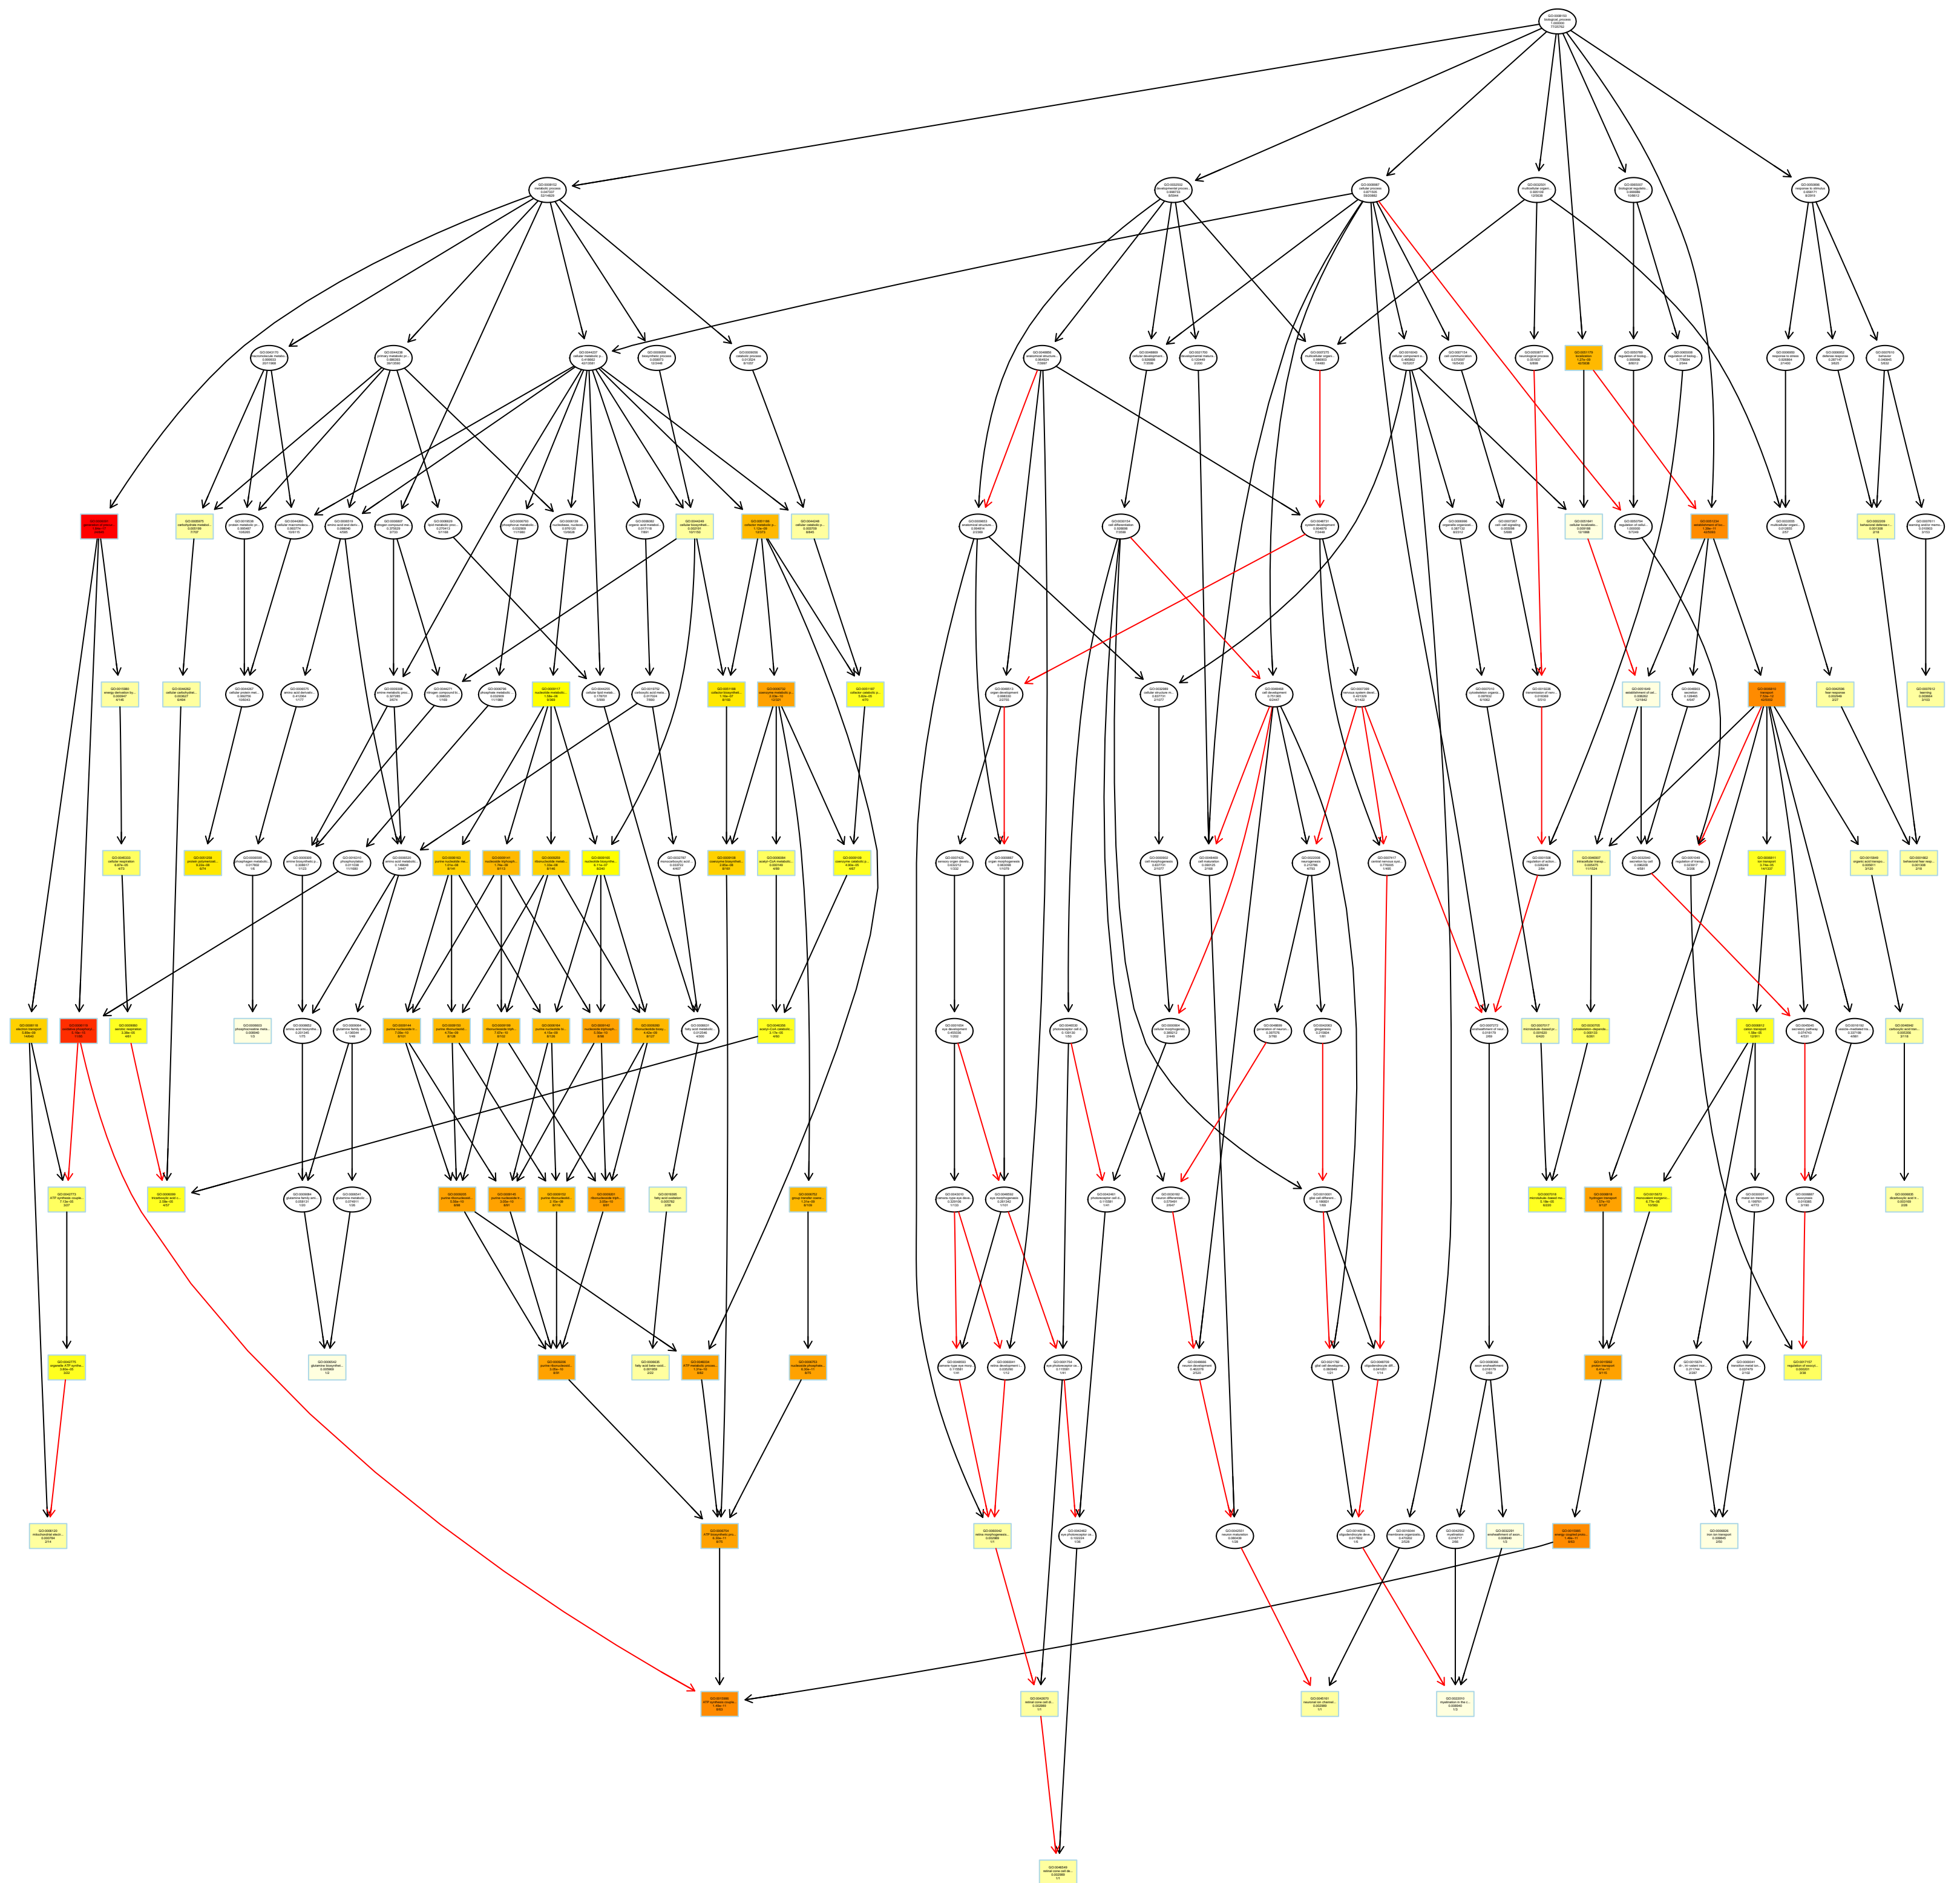

Figure S10 Cellular Location MATRIX - HEART

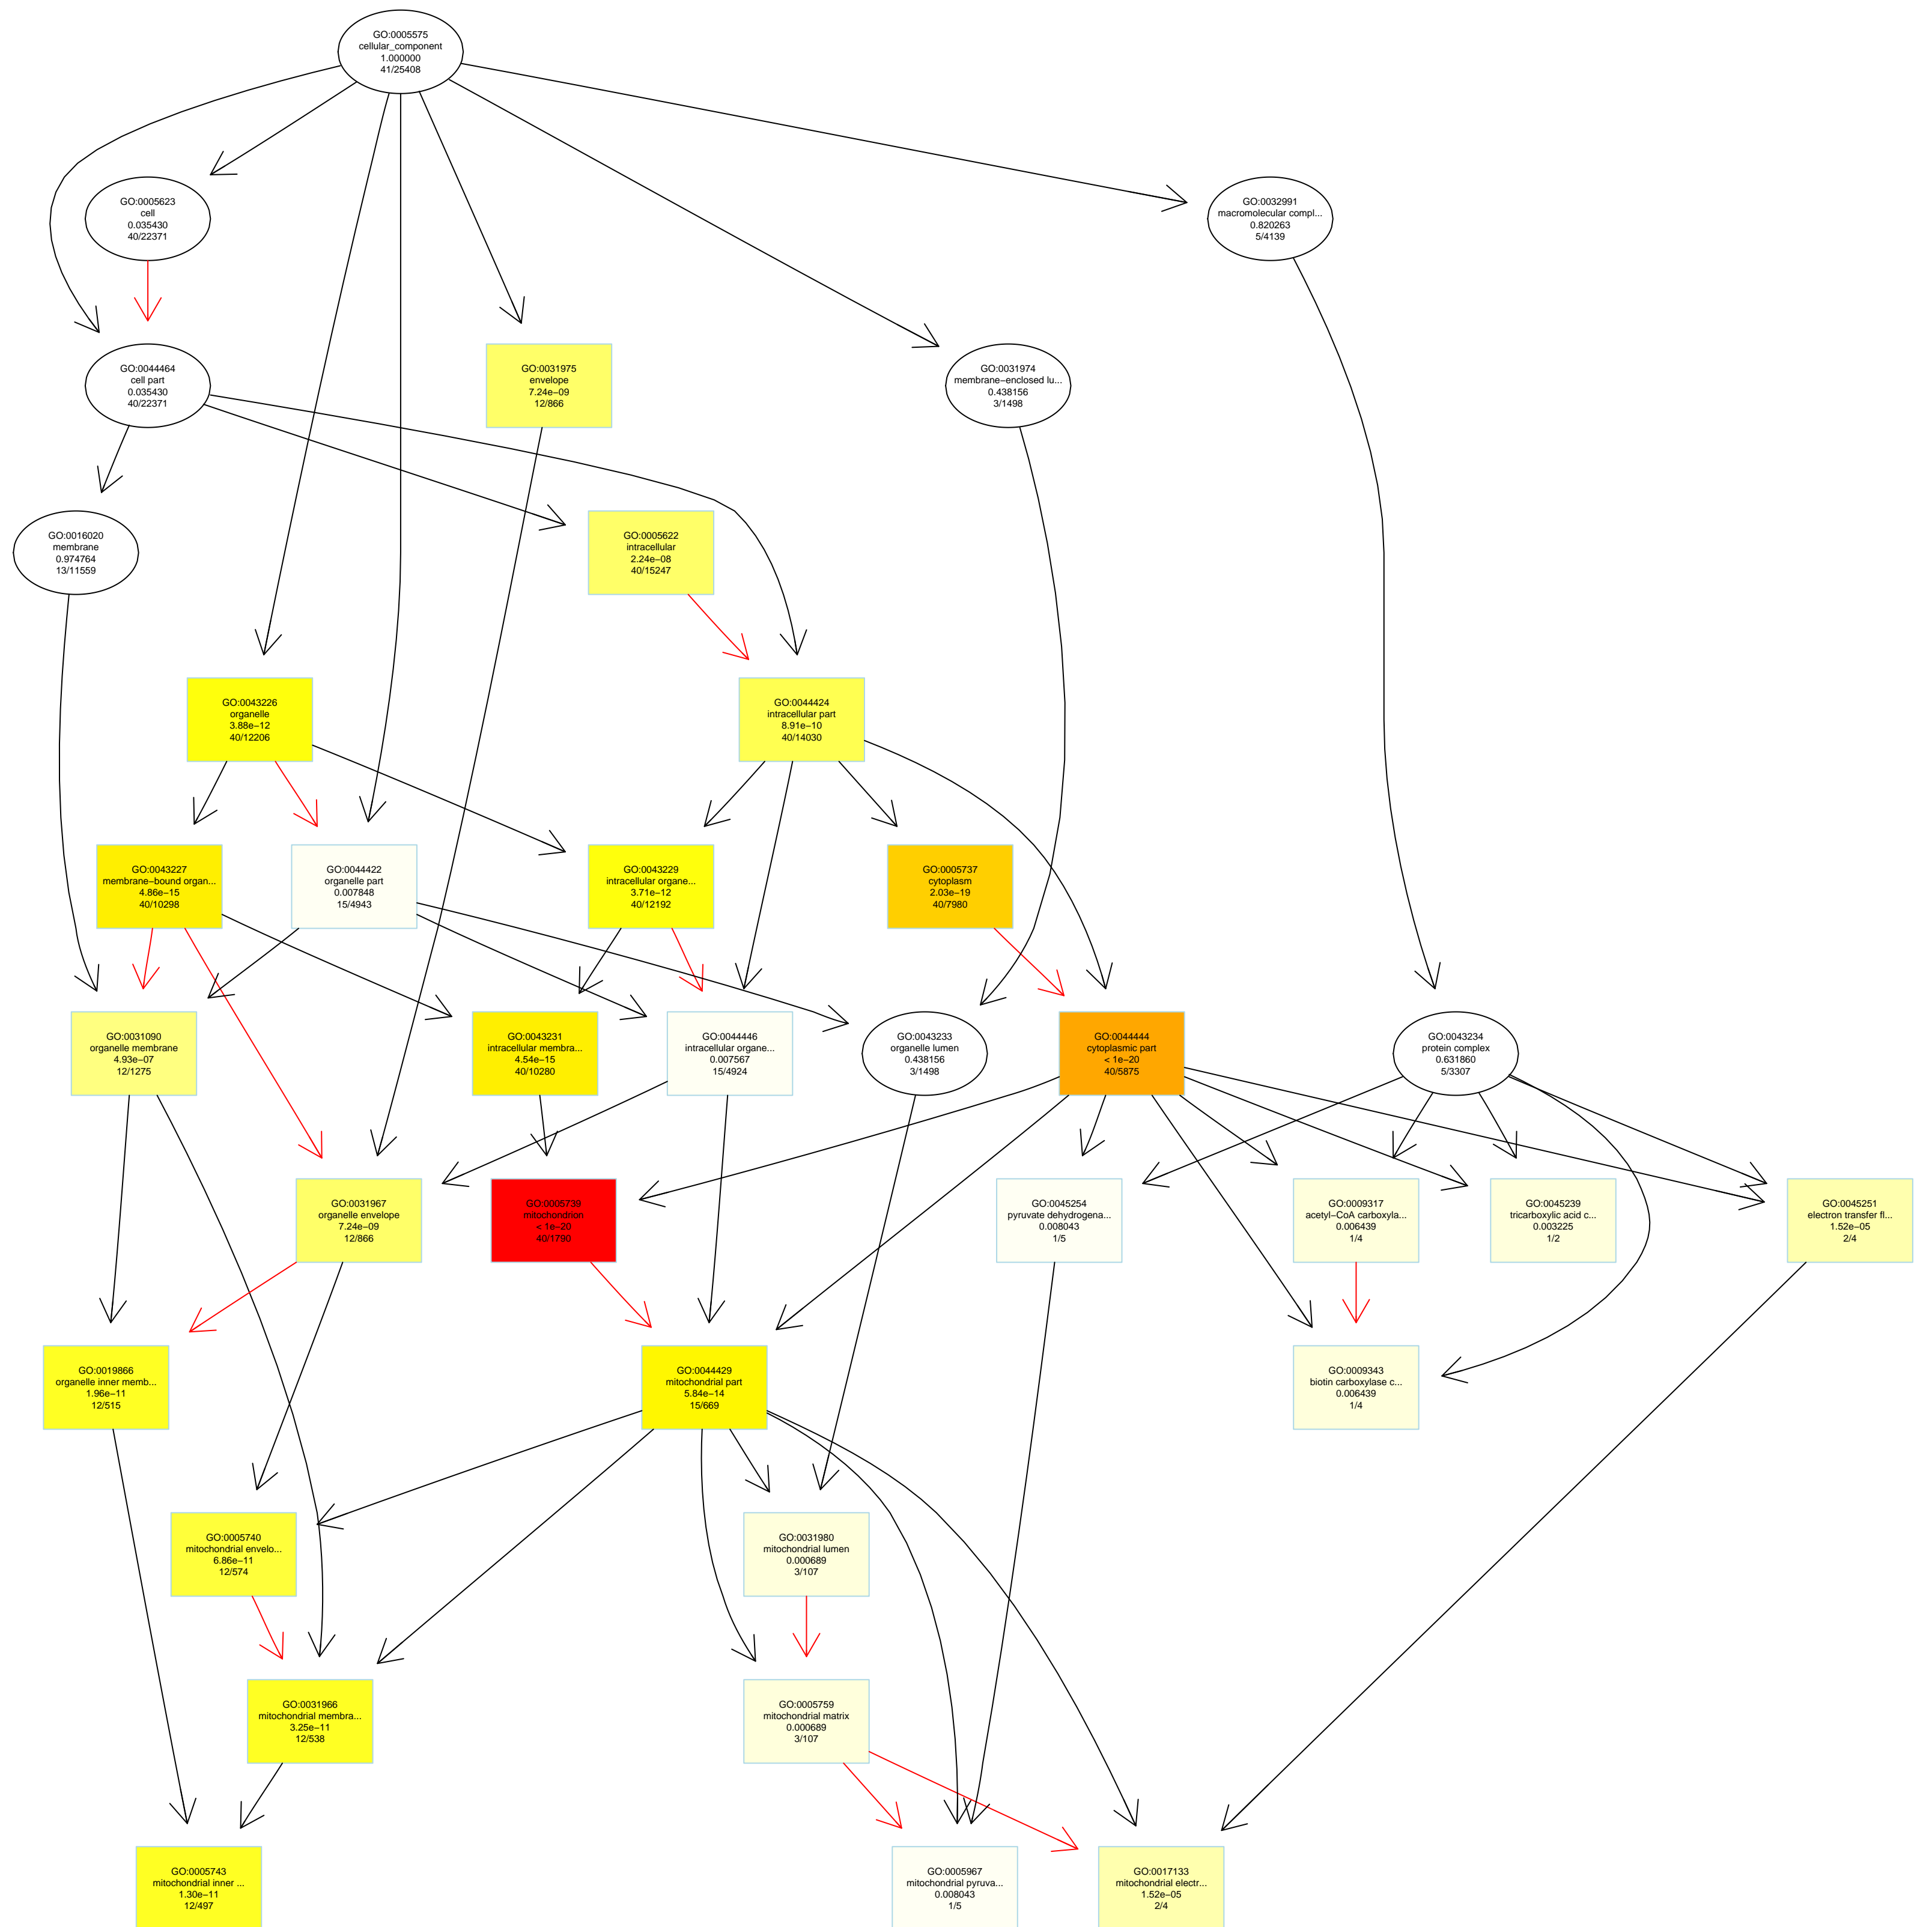



Figure S10 Biological Process MATRIX - HEART

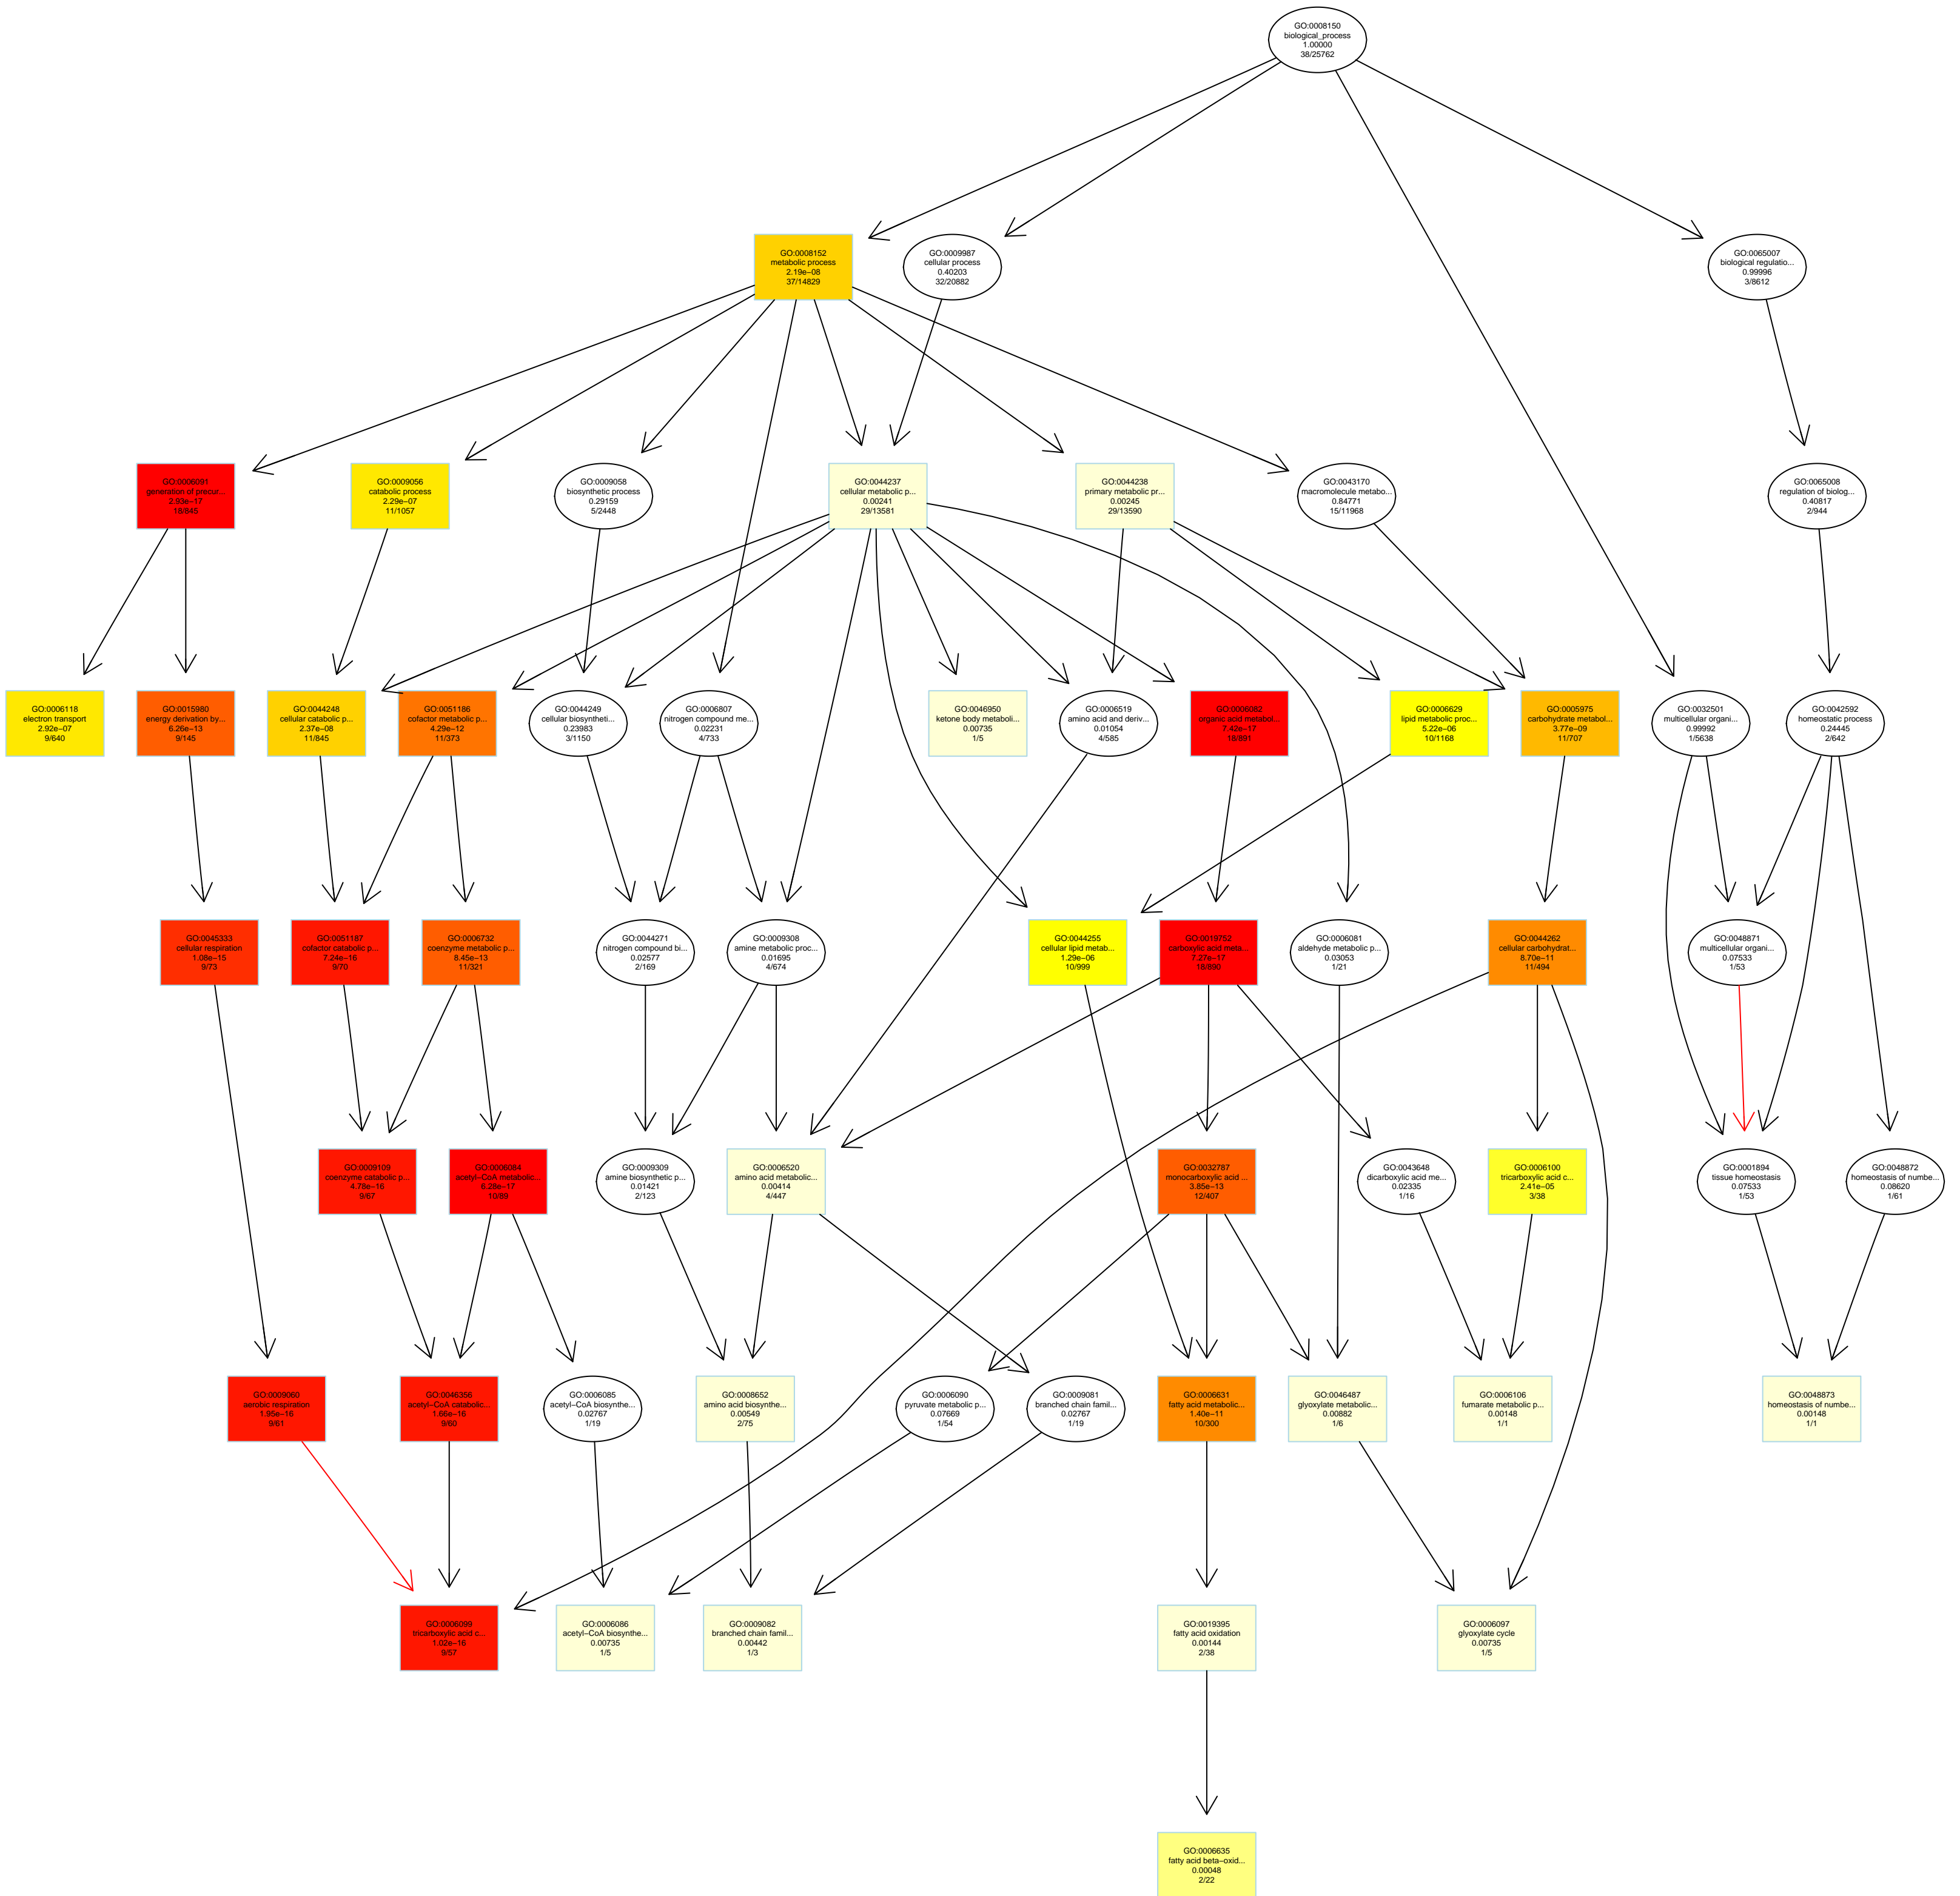

Figure S11 Cellular Location MEMBRANE - HEART

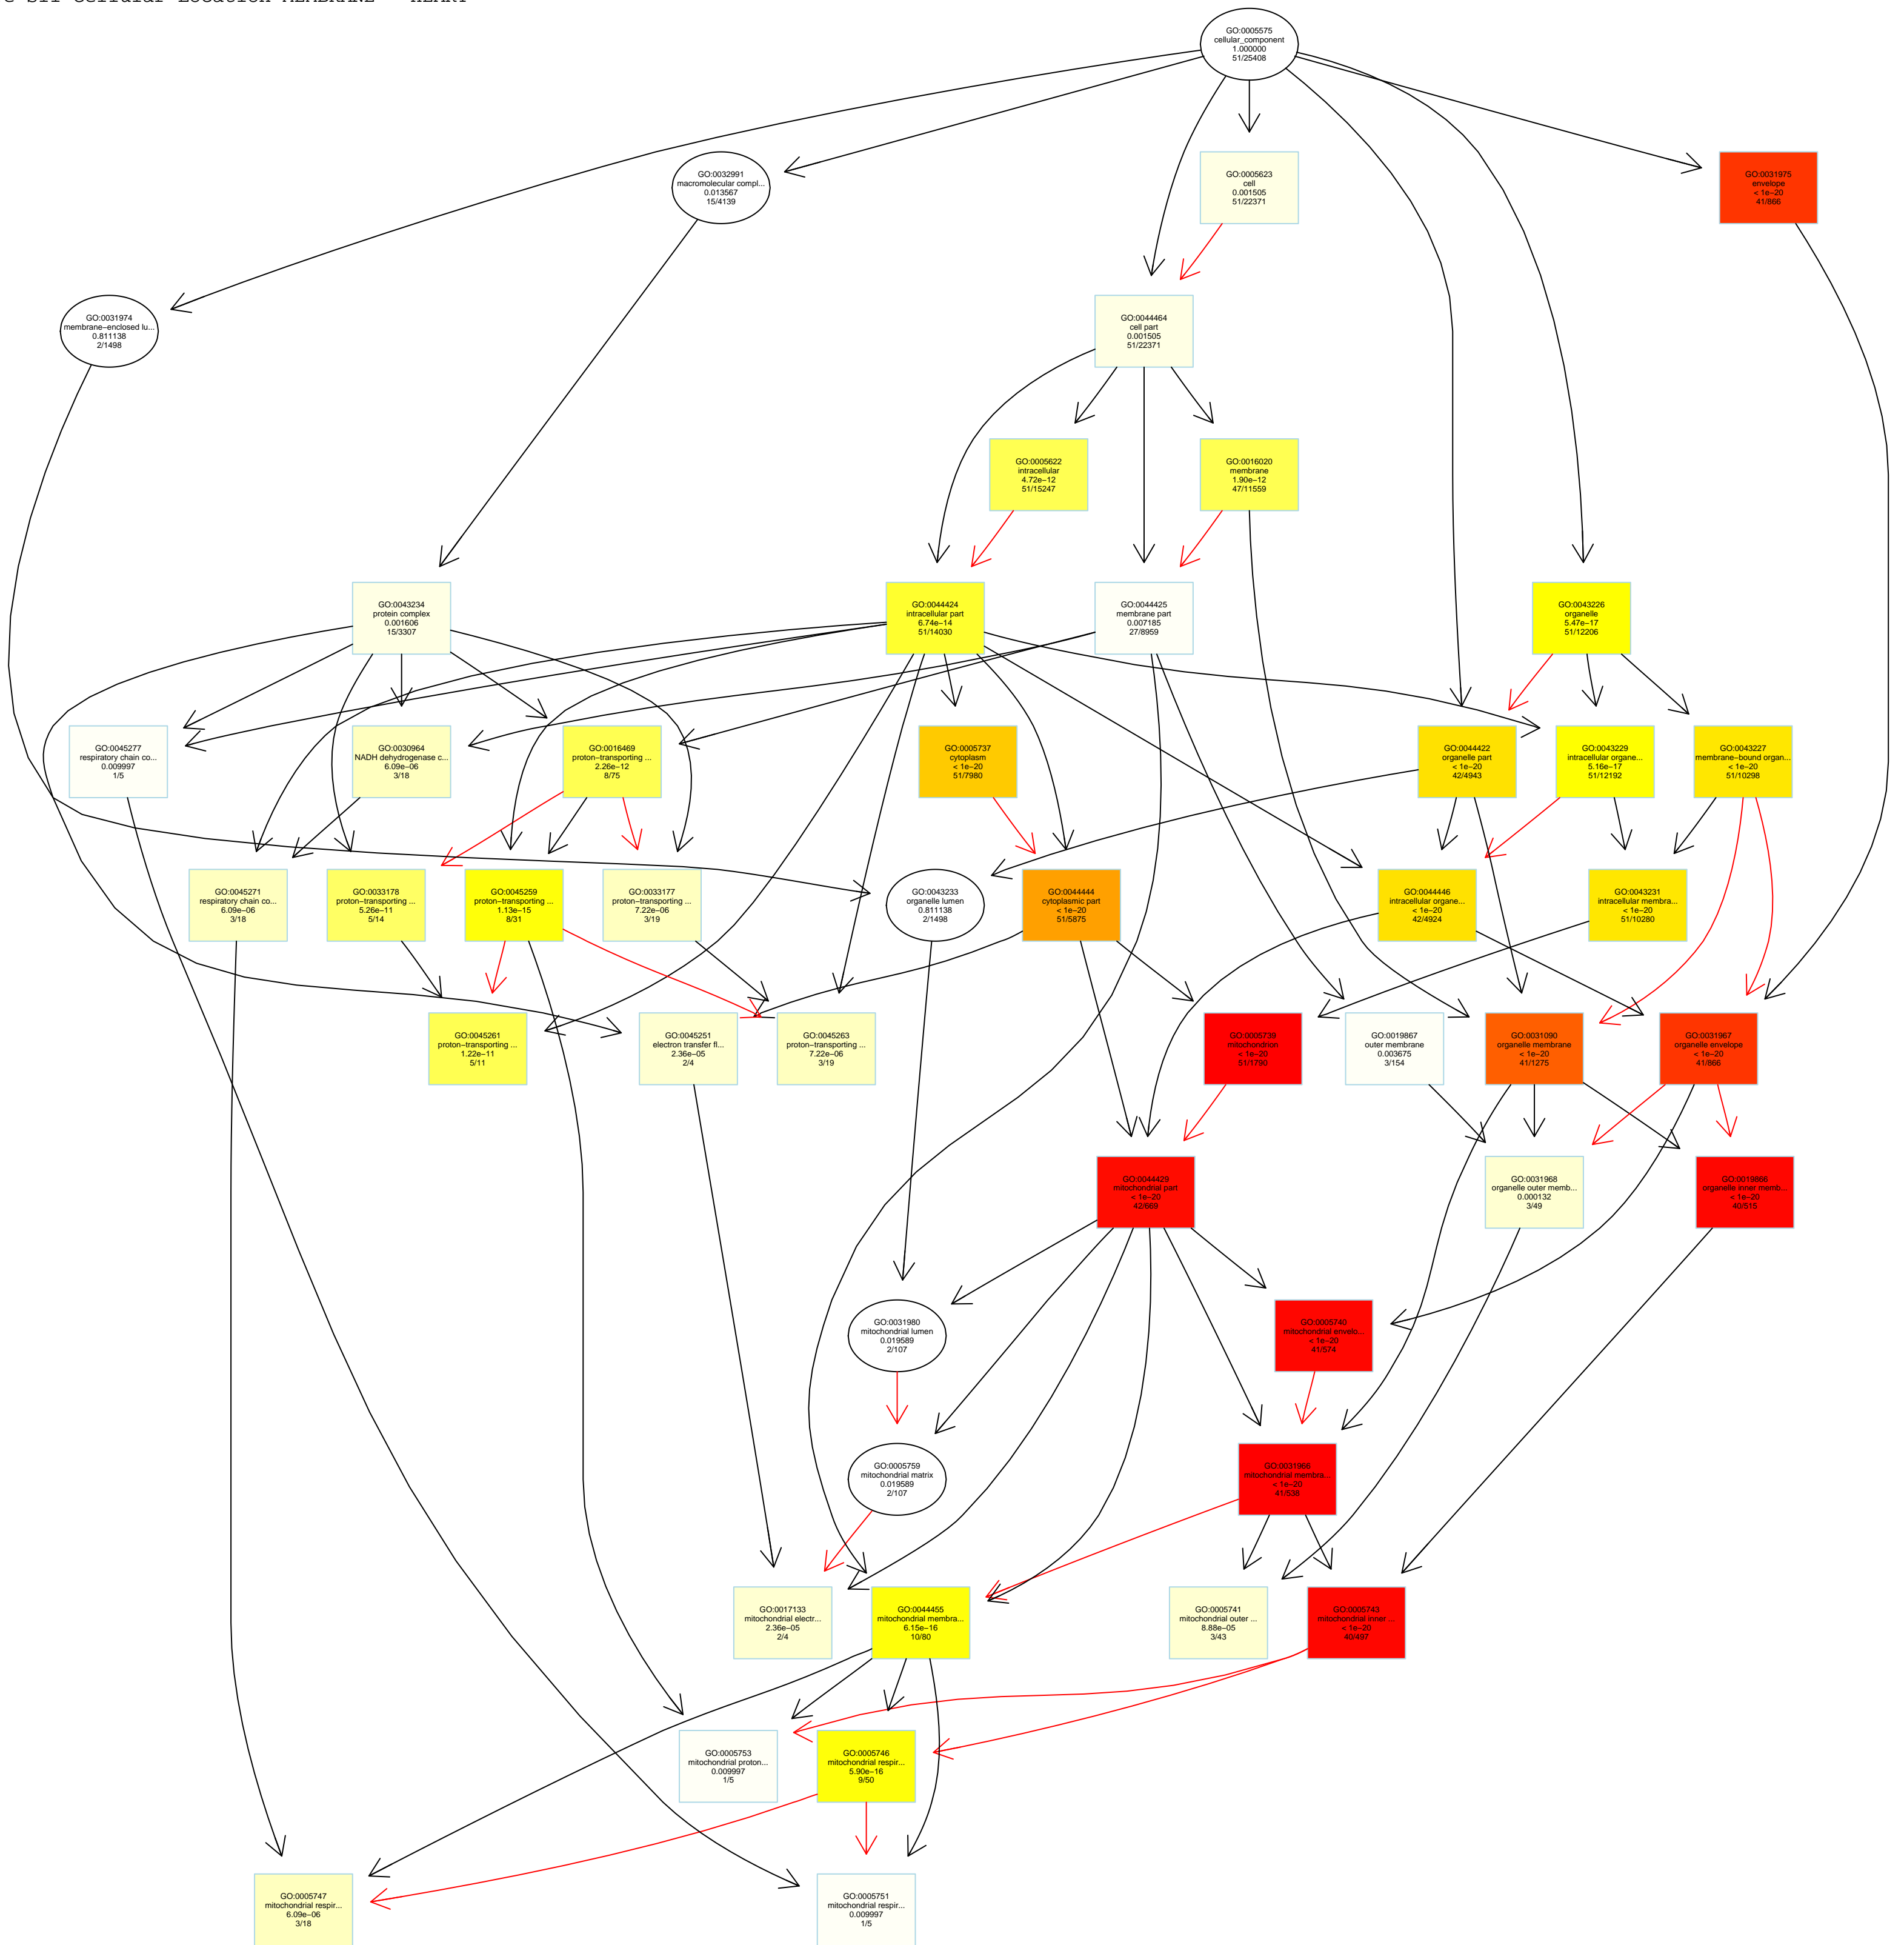

Figure S11 Molecular Function MEMBRANE - HEART

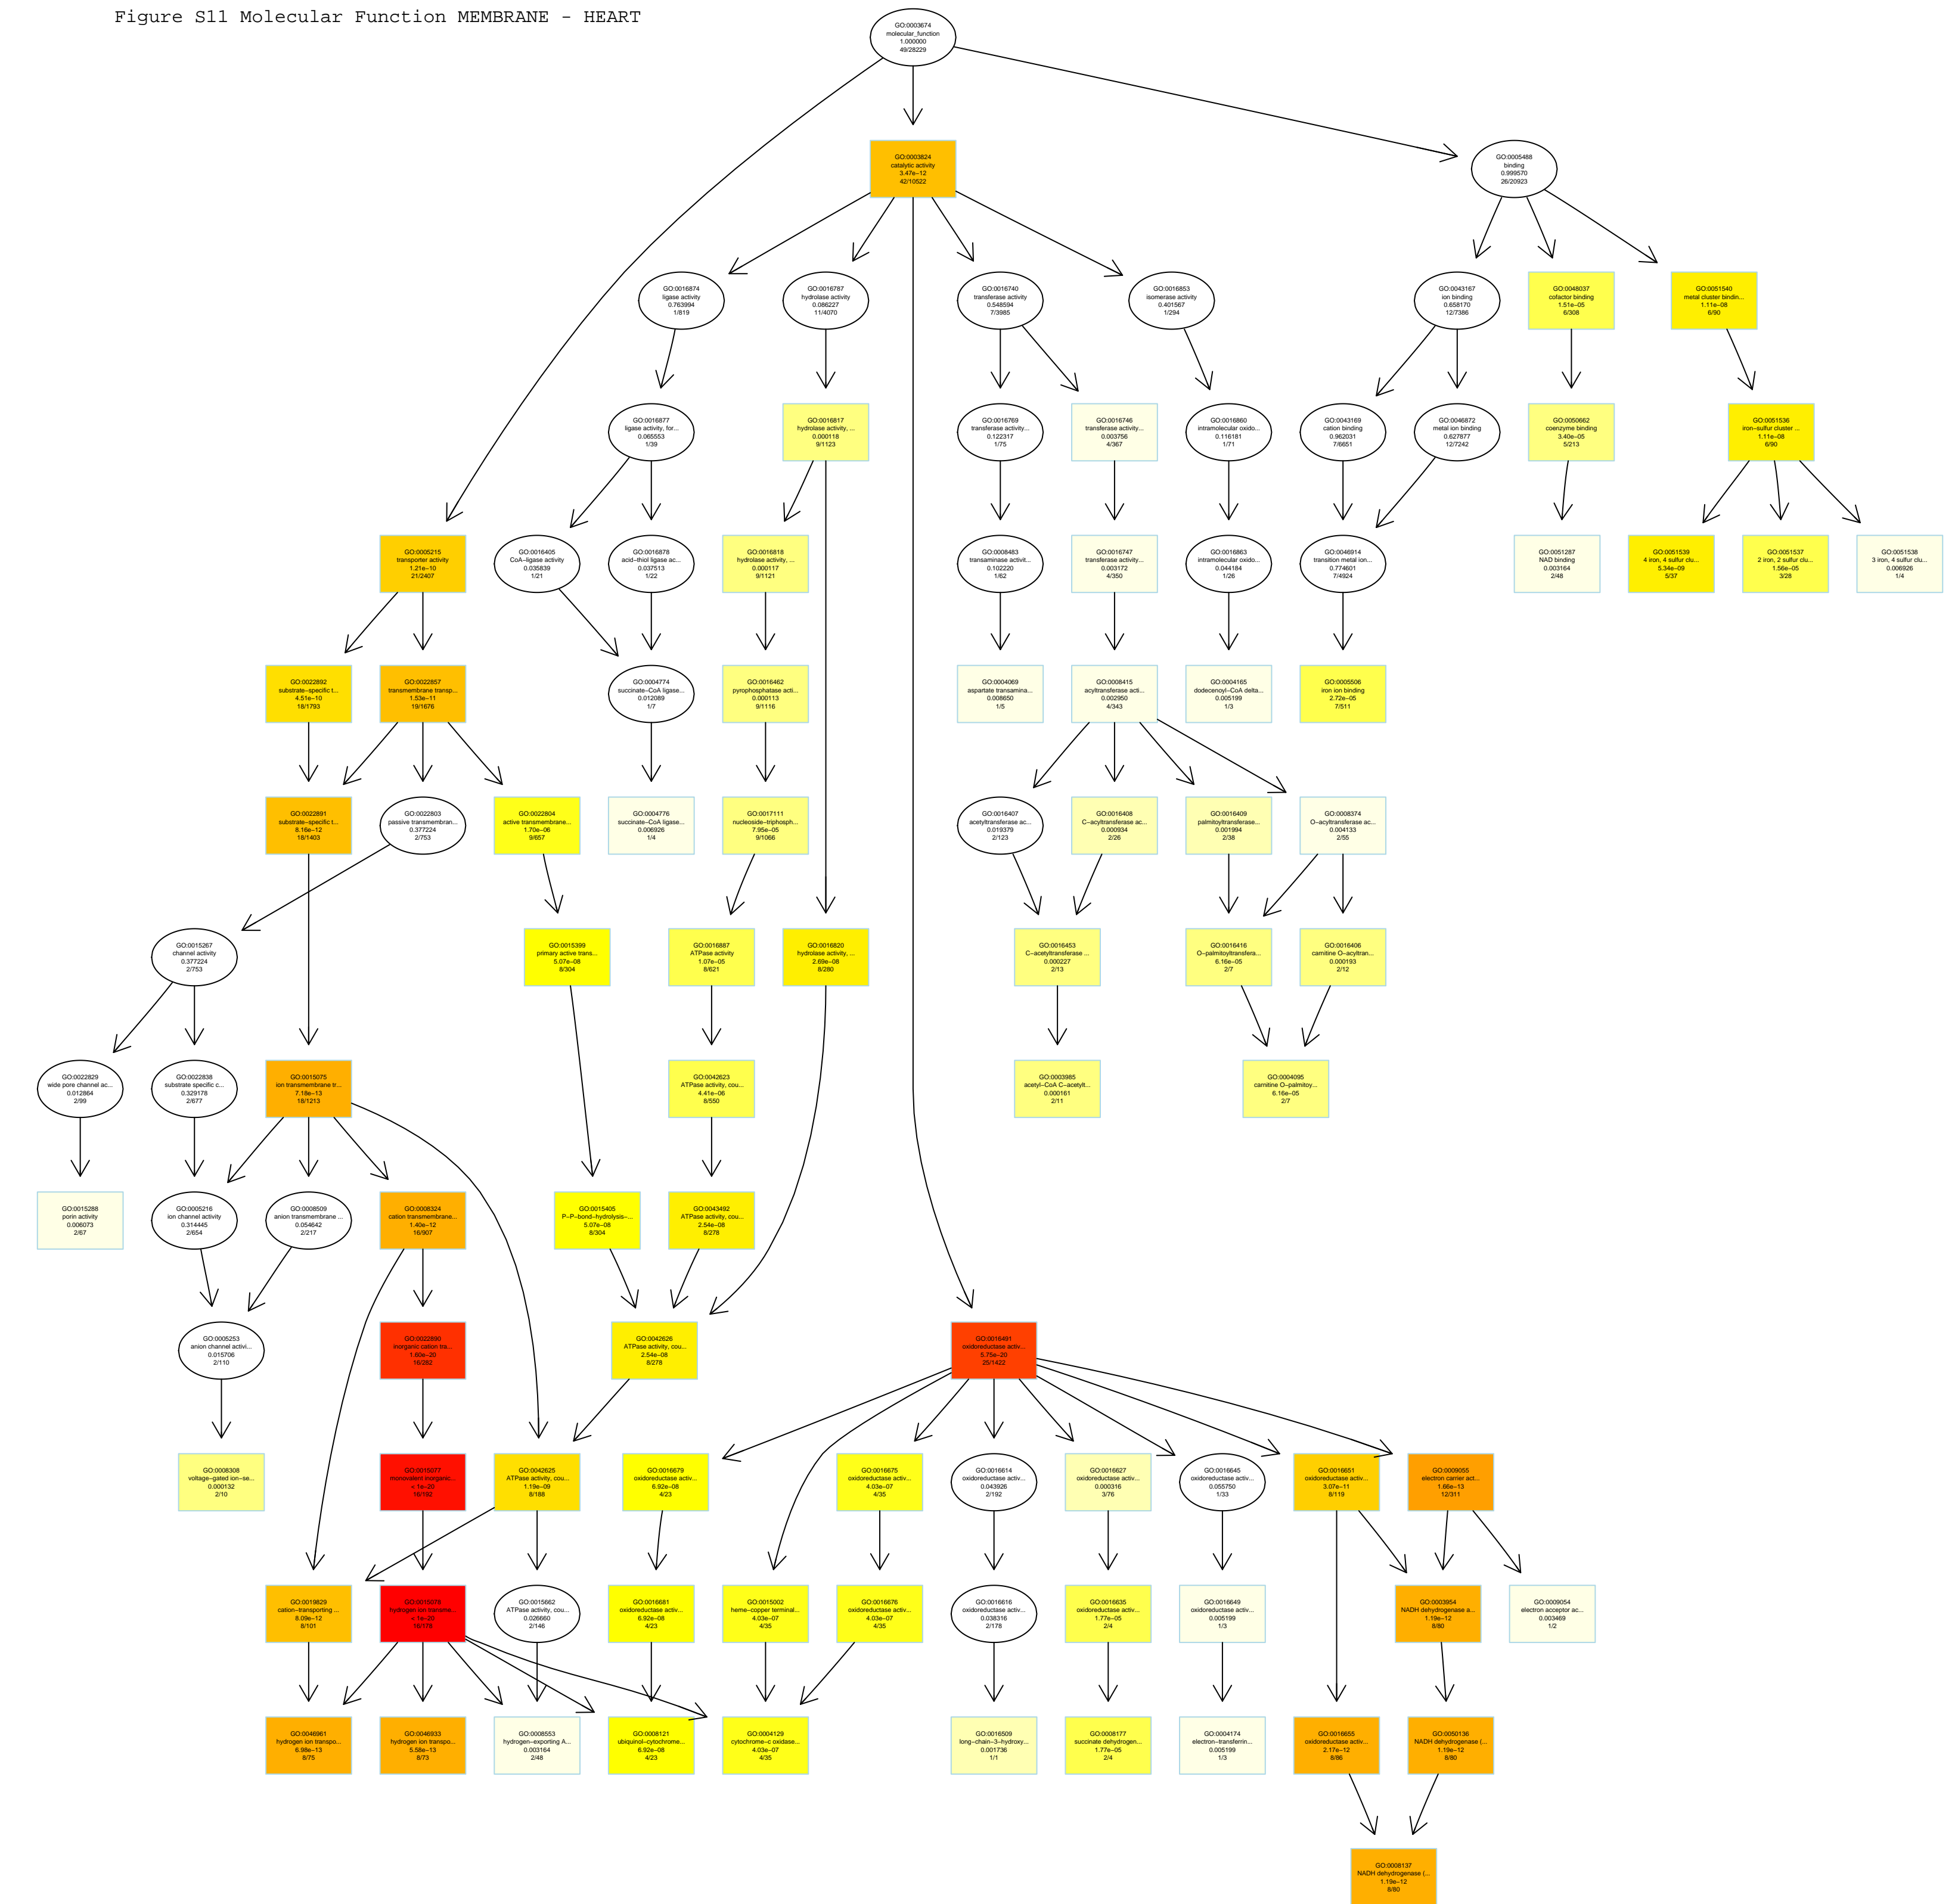

Figure S11 Biological Process MEMBRANE - HEART

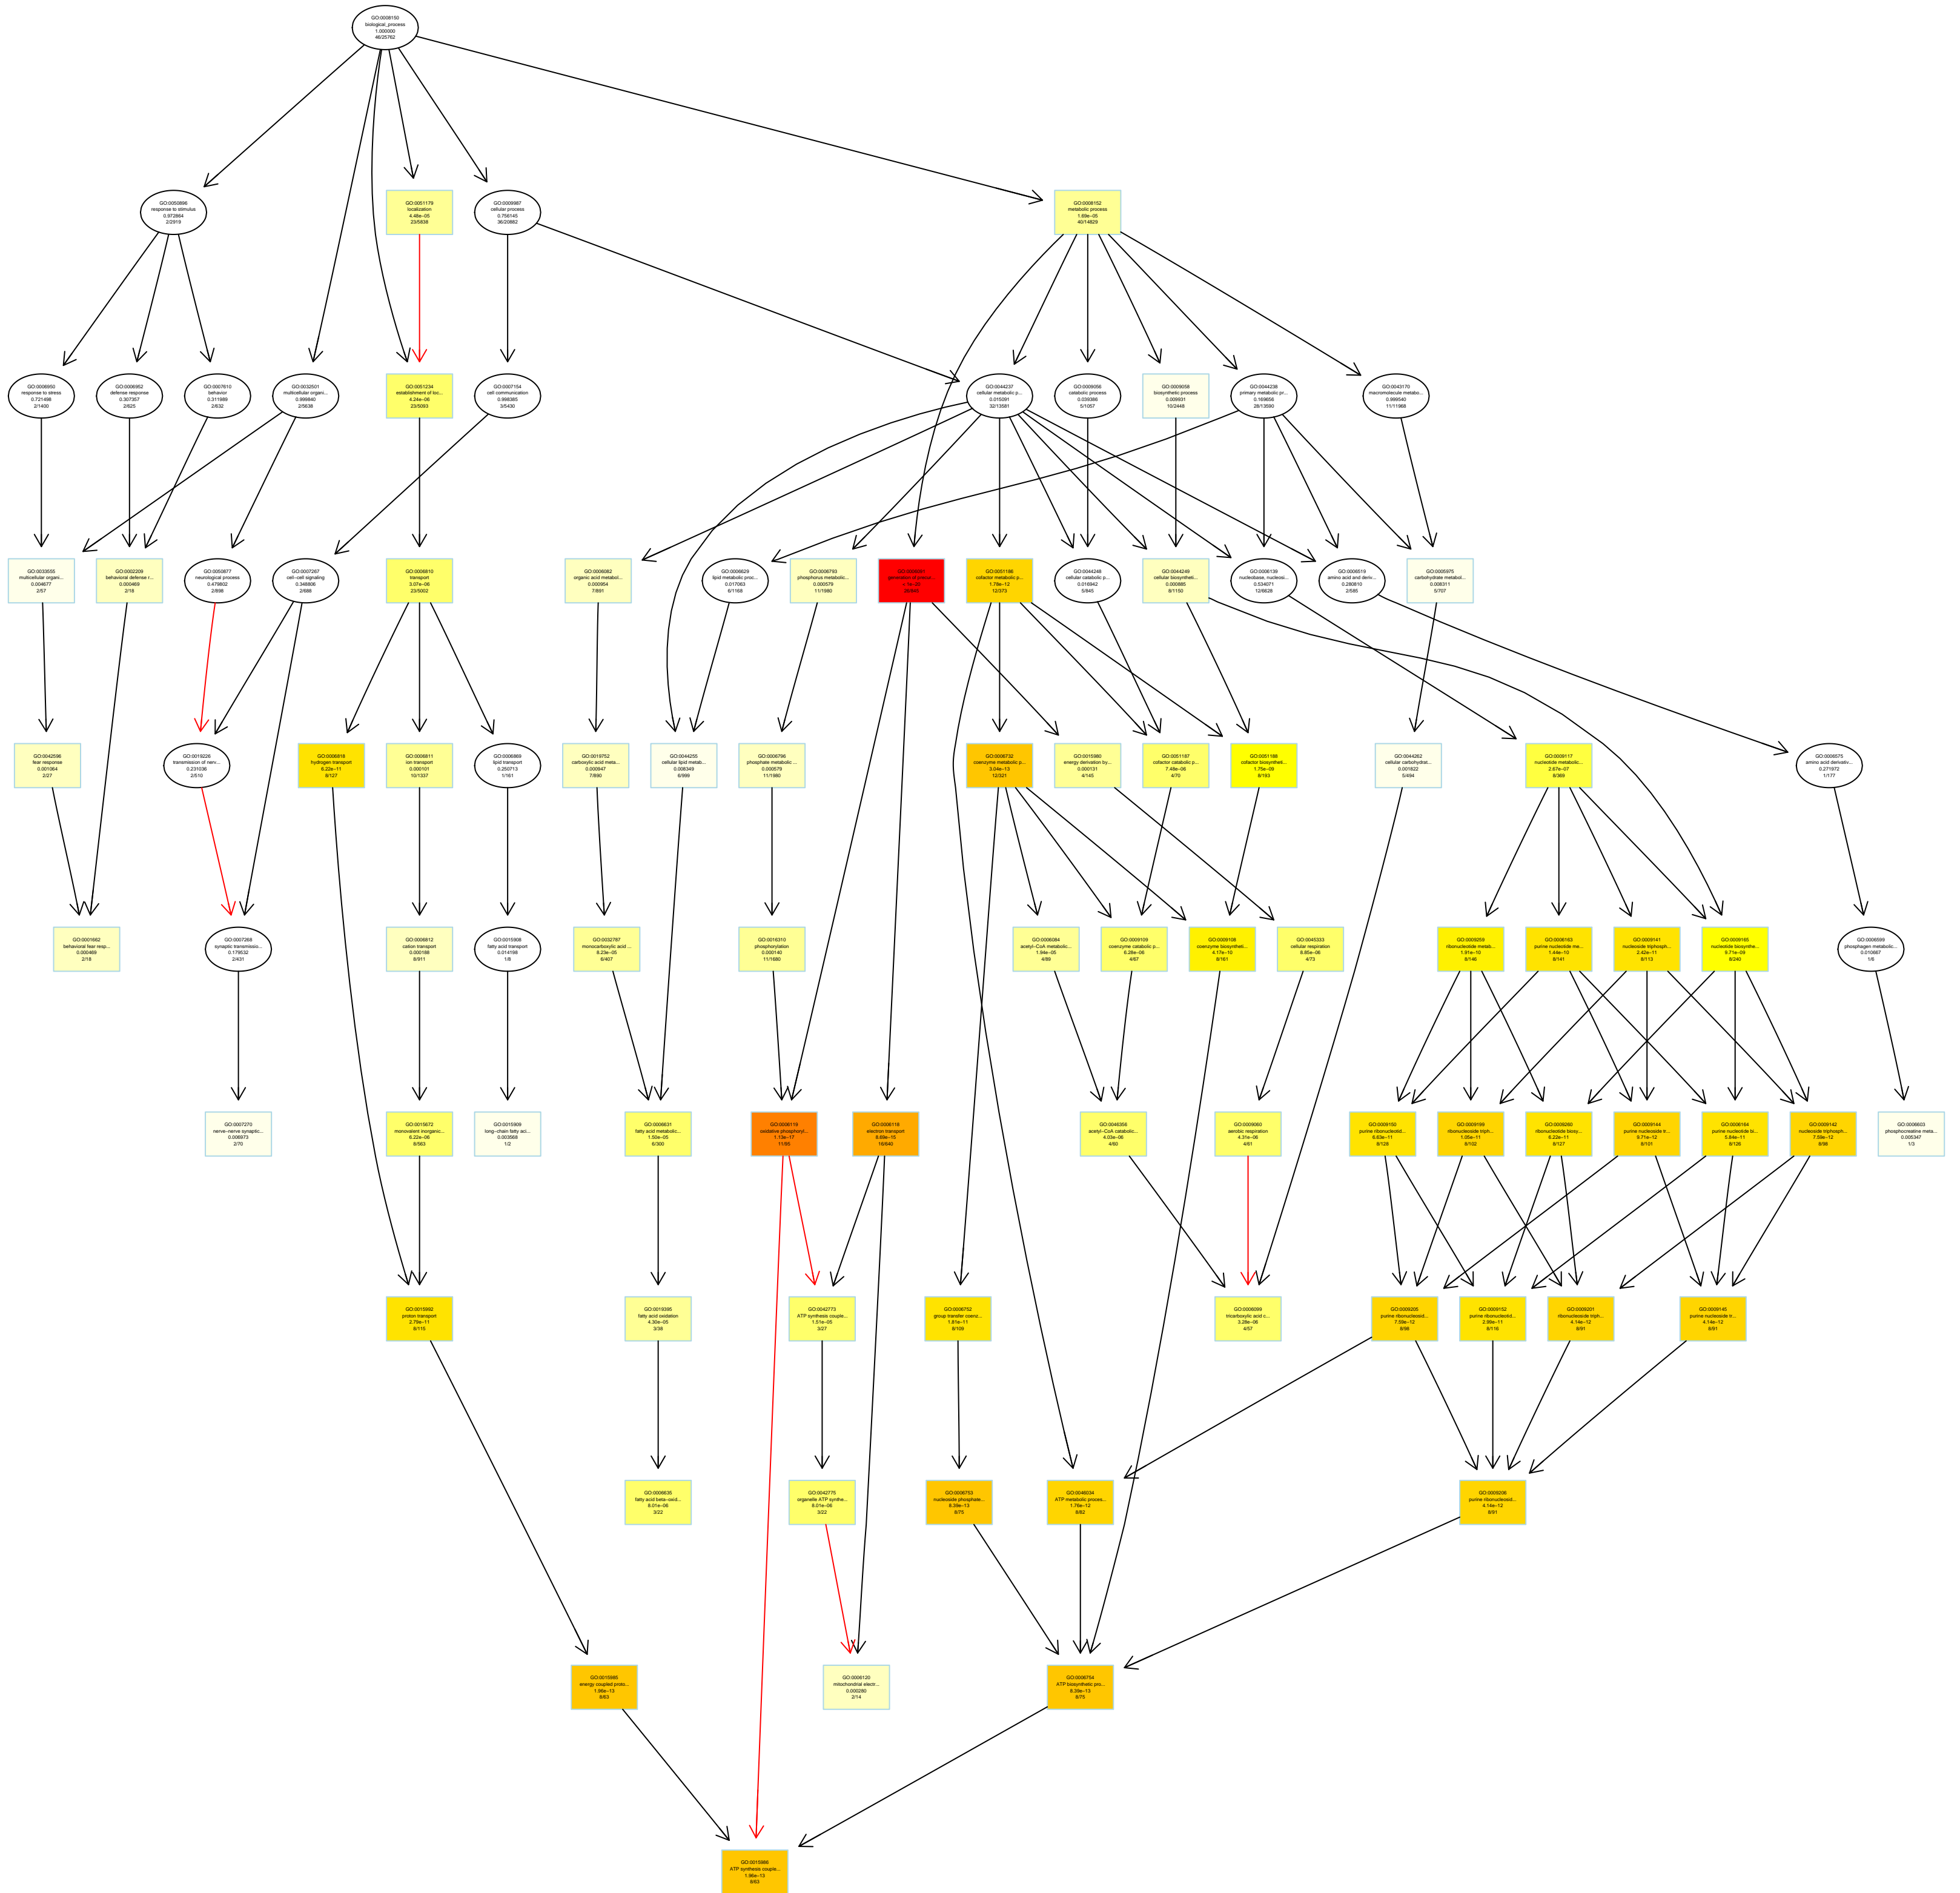



Figure S12 Cellular Location MATRIX - KIDNEY

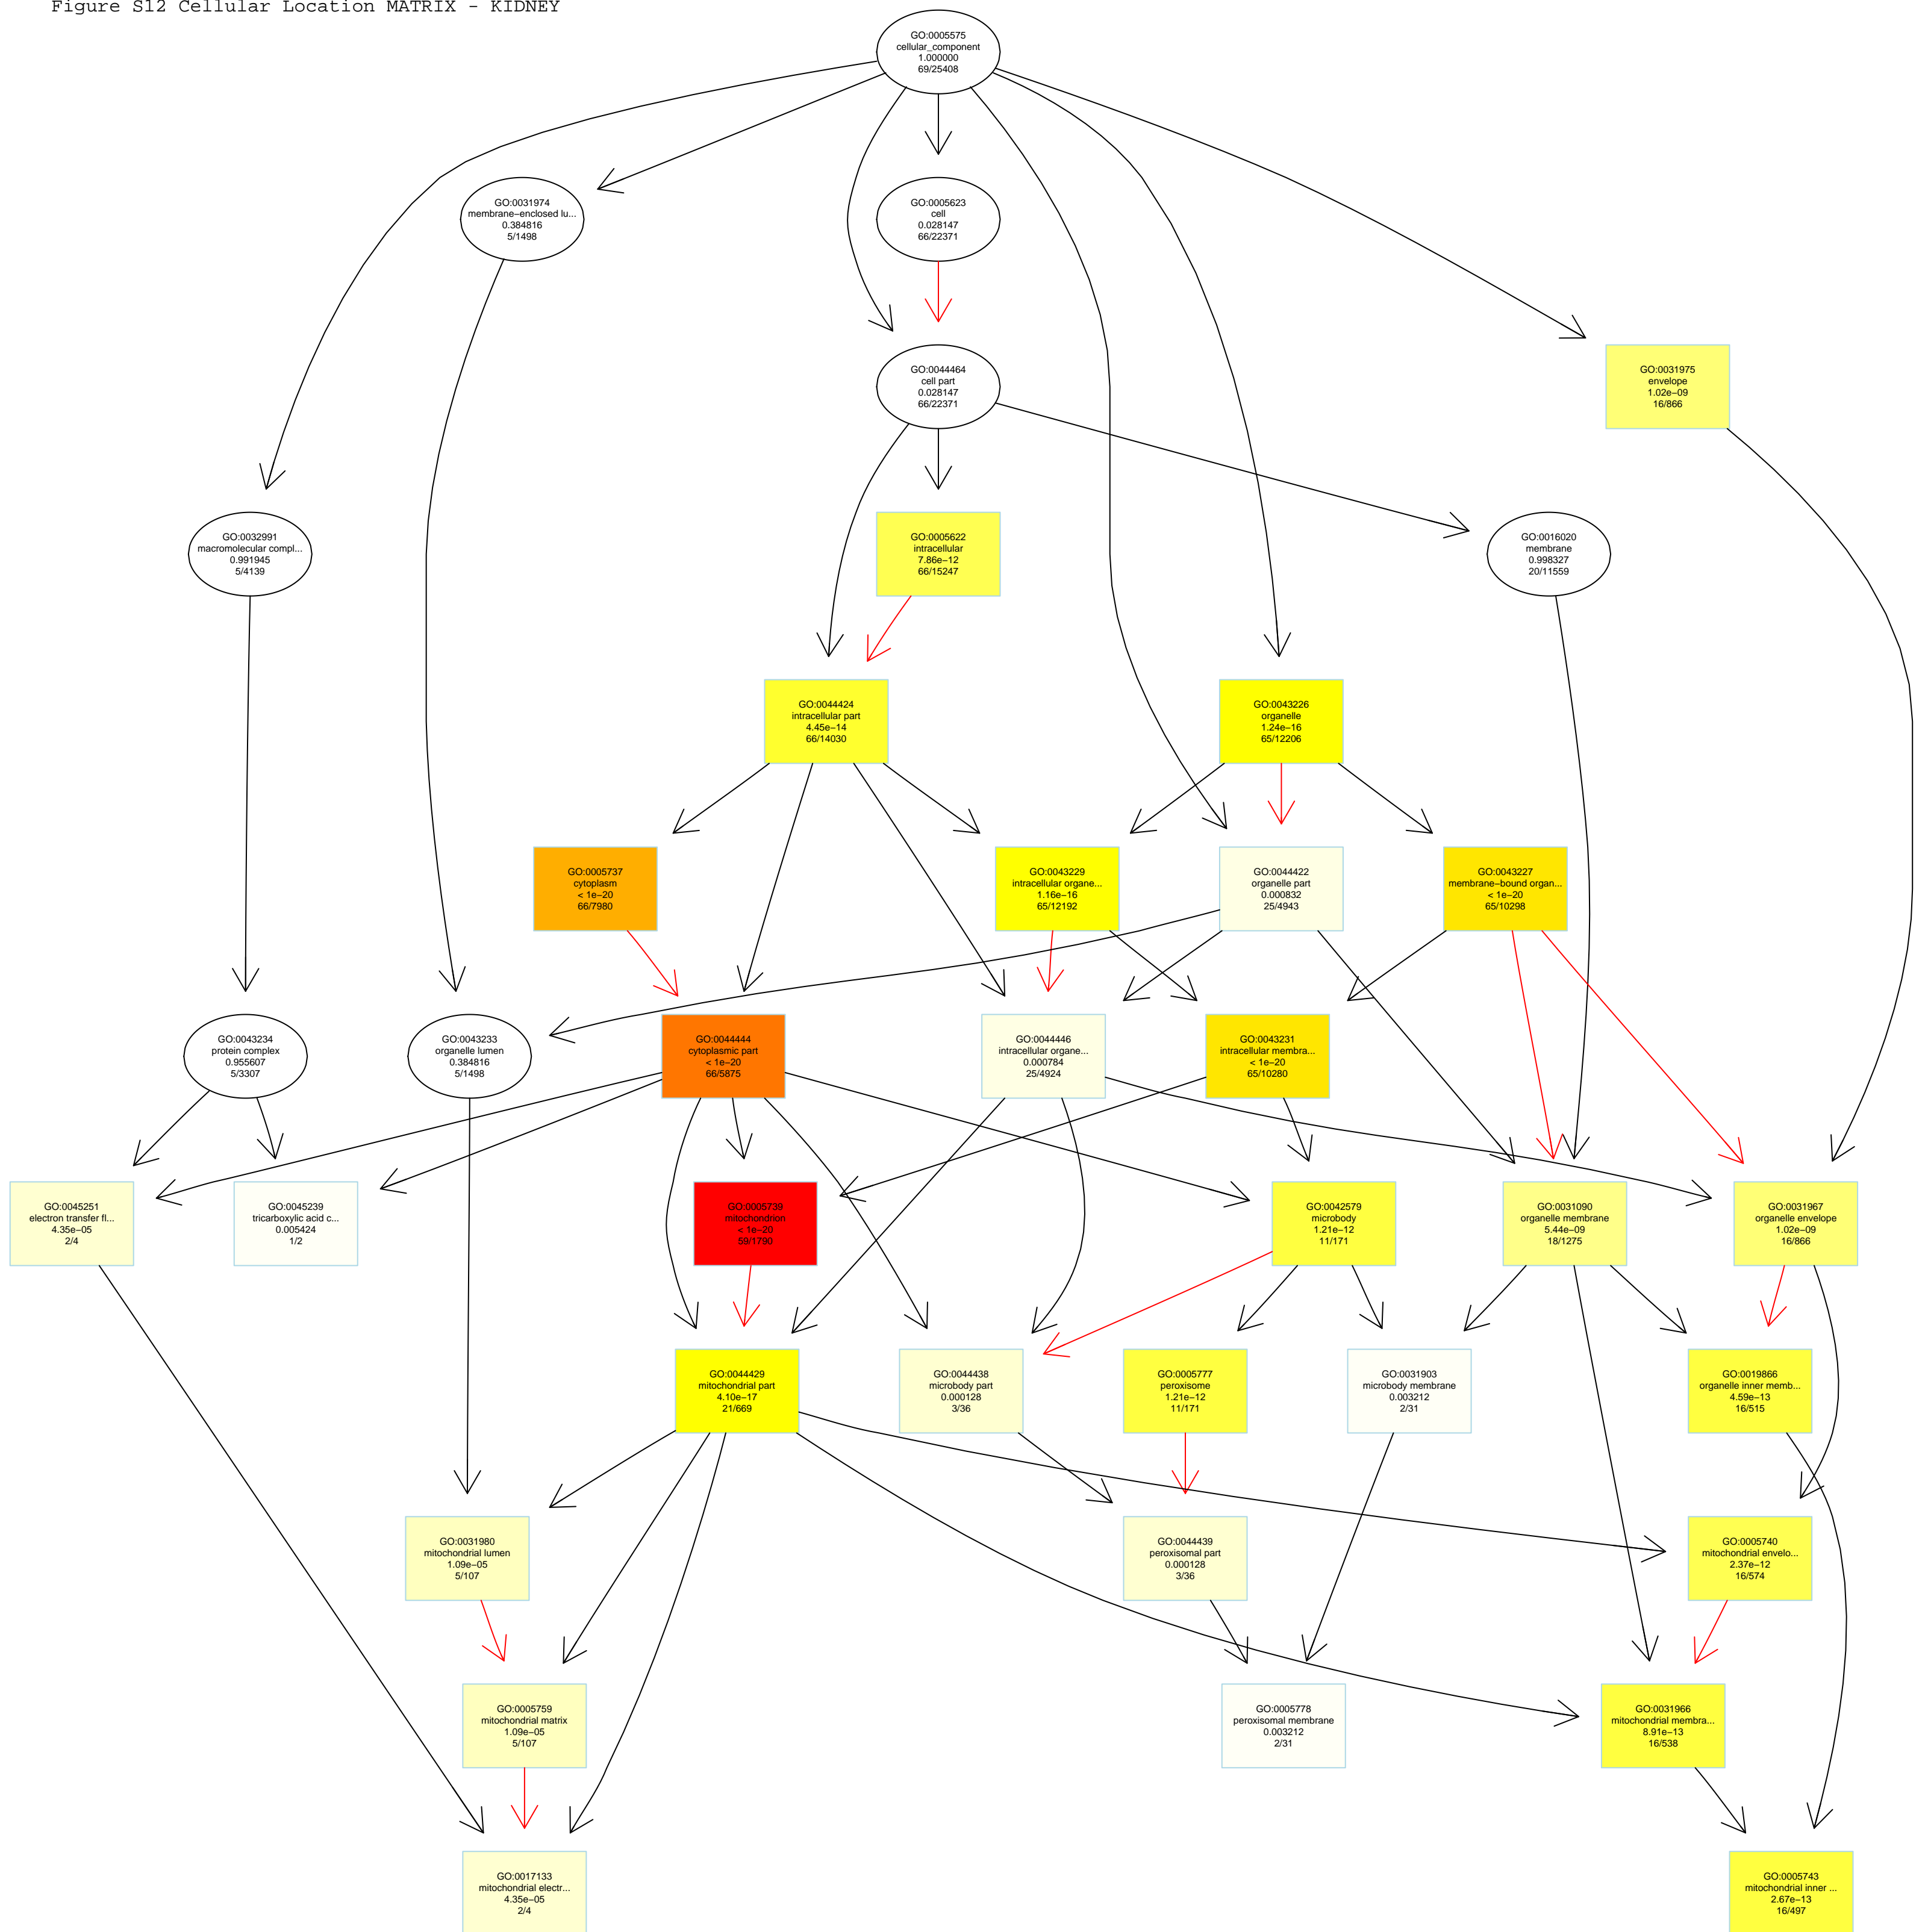

Figure S12 Molecular Function MATRIX - KIDNEY

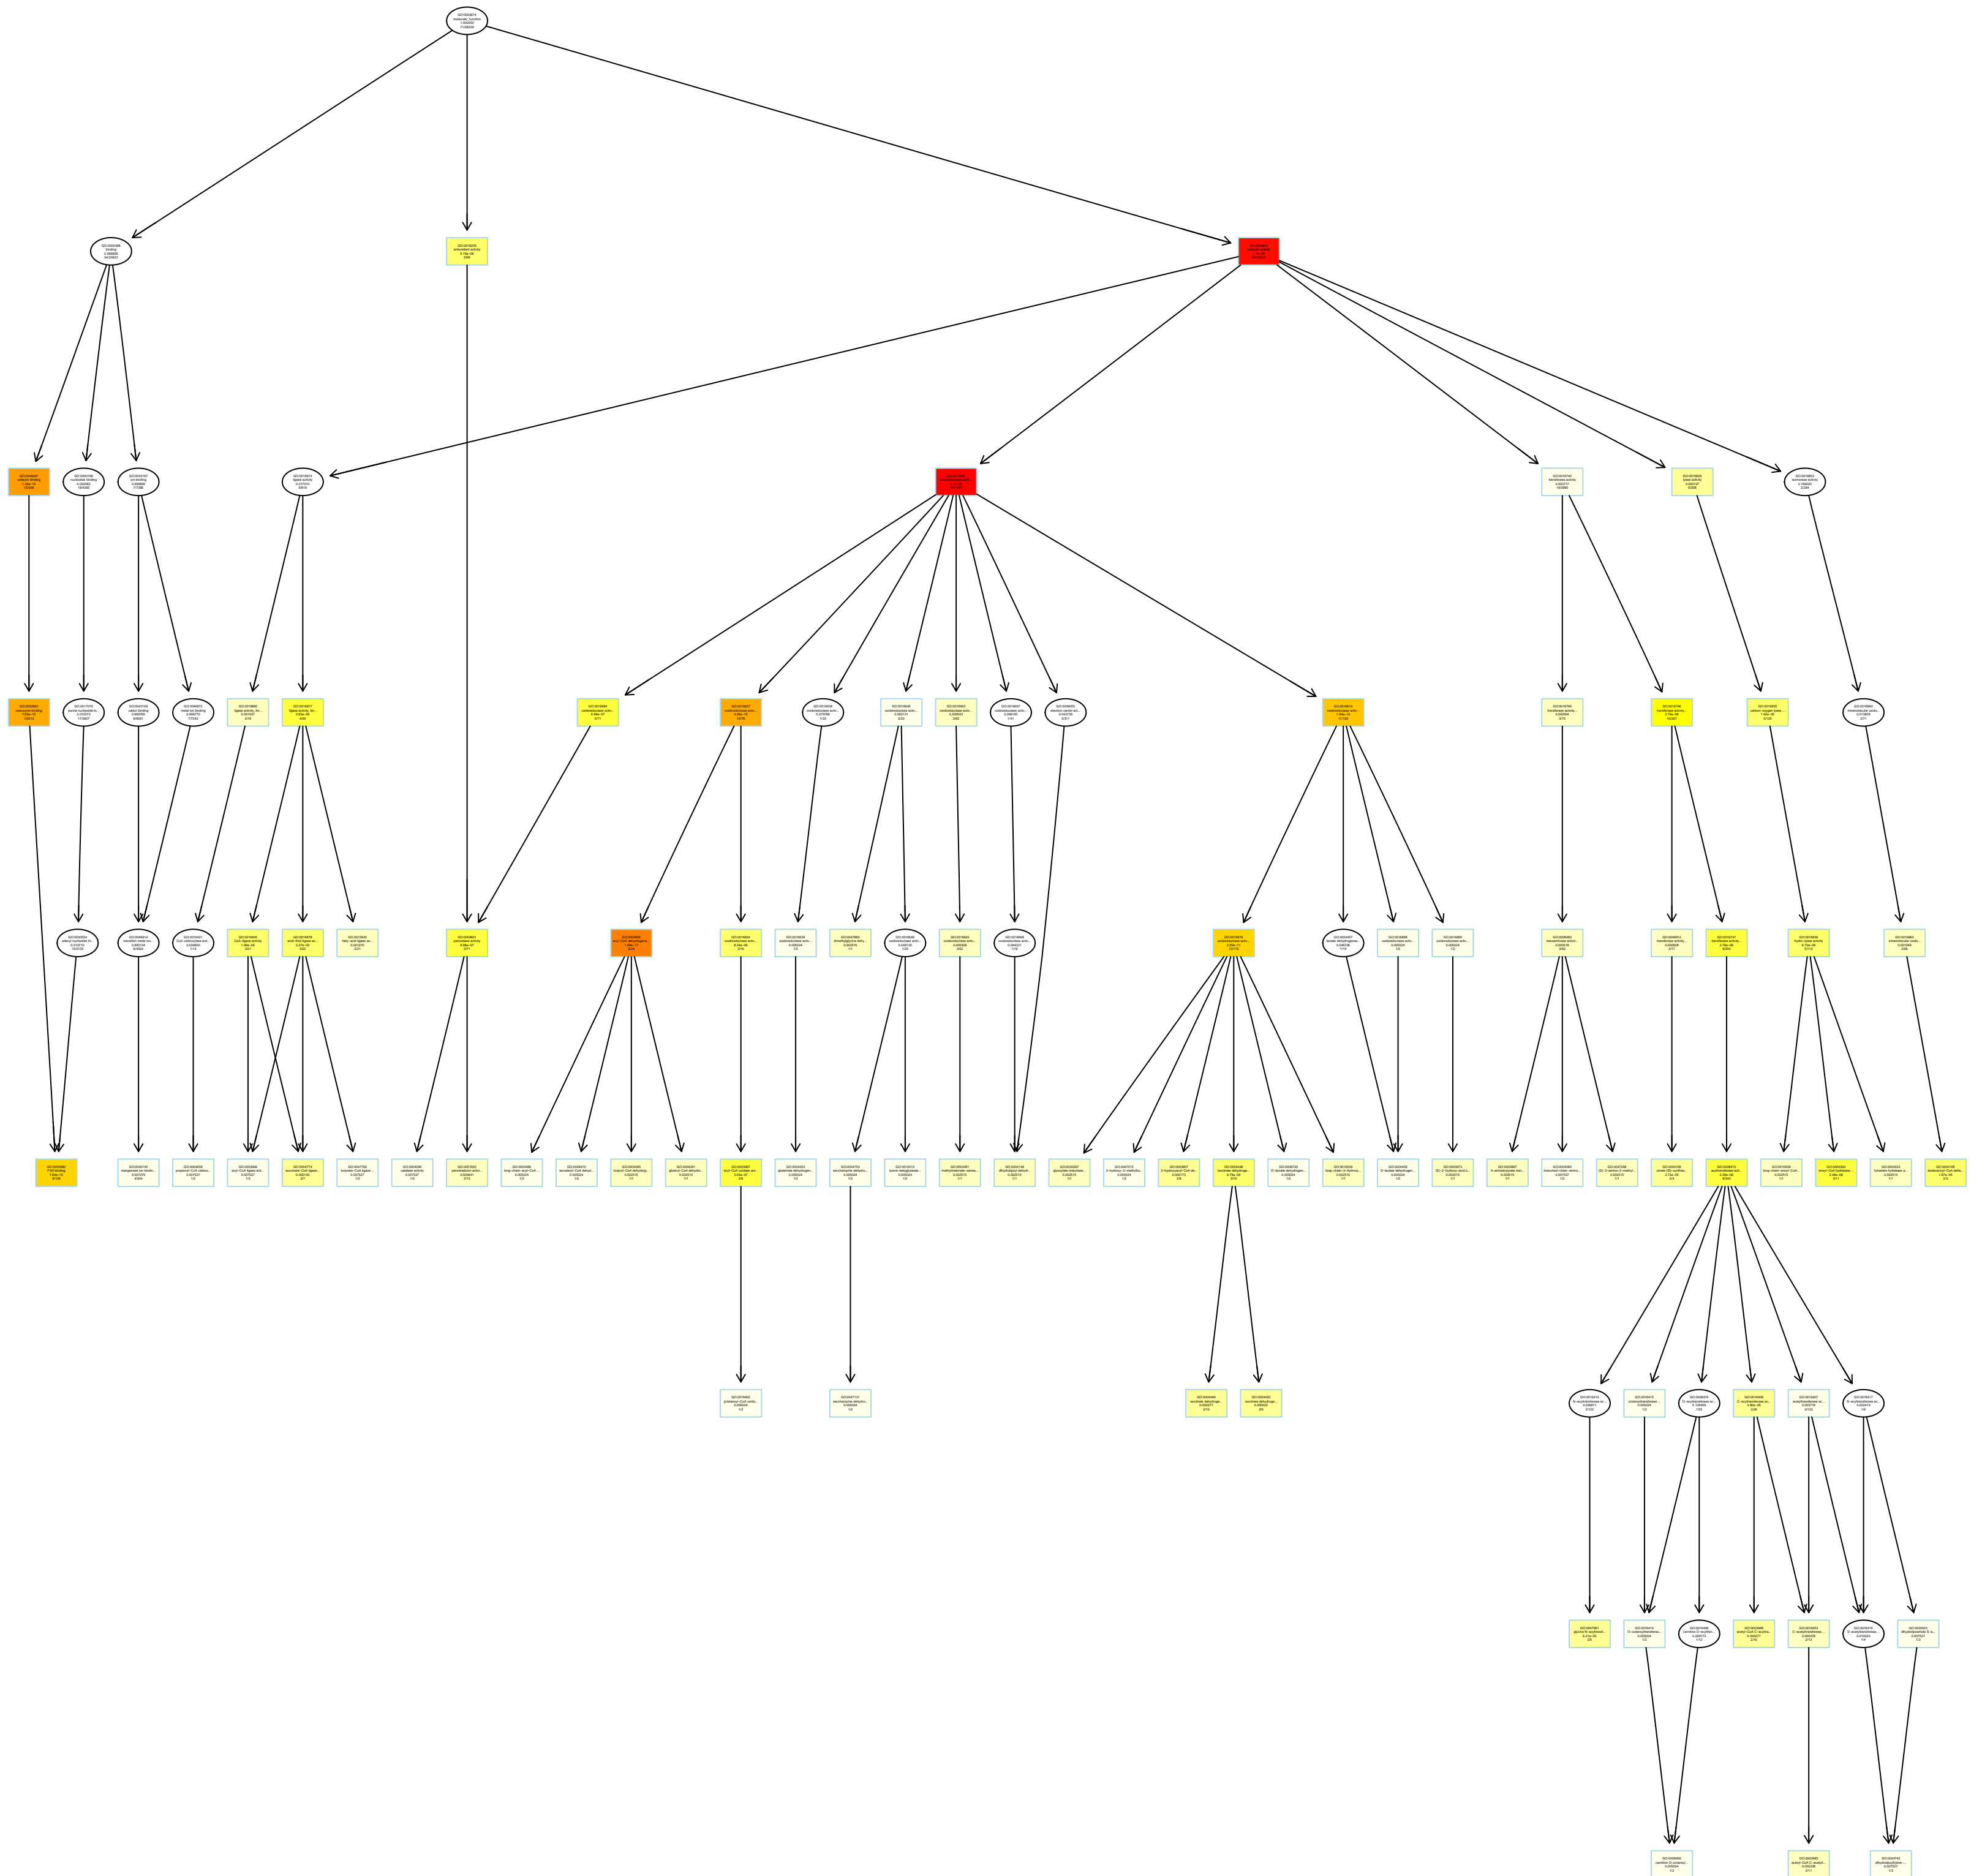

Figure S12 Biological Process MATRIX - KIDNEY

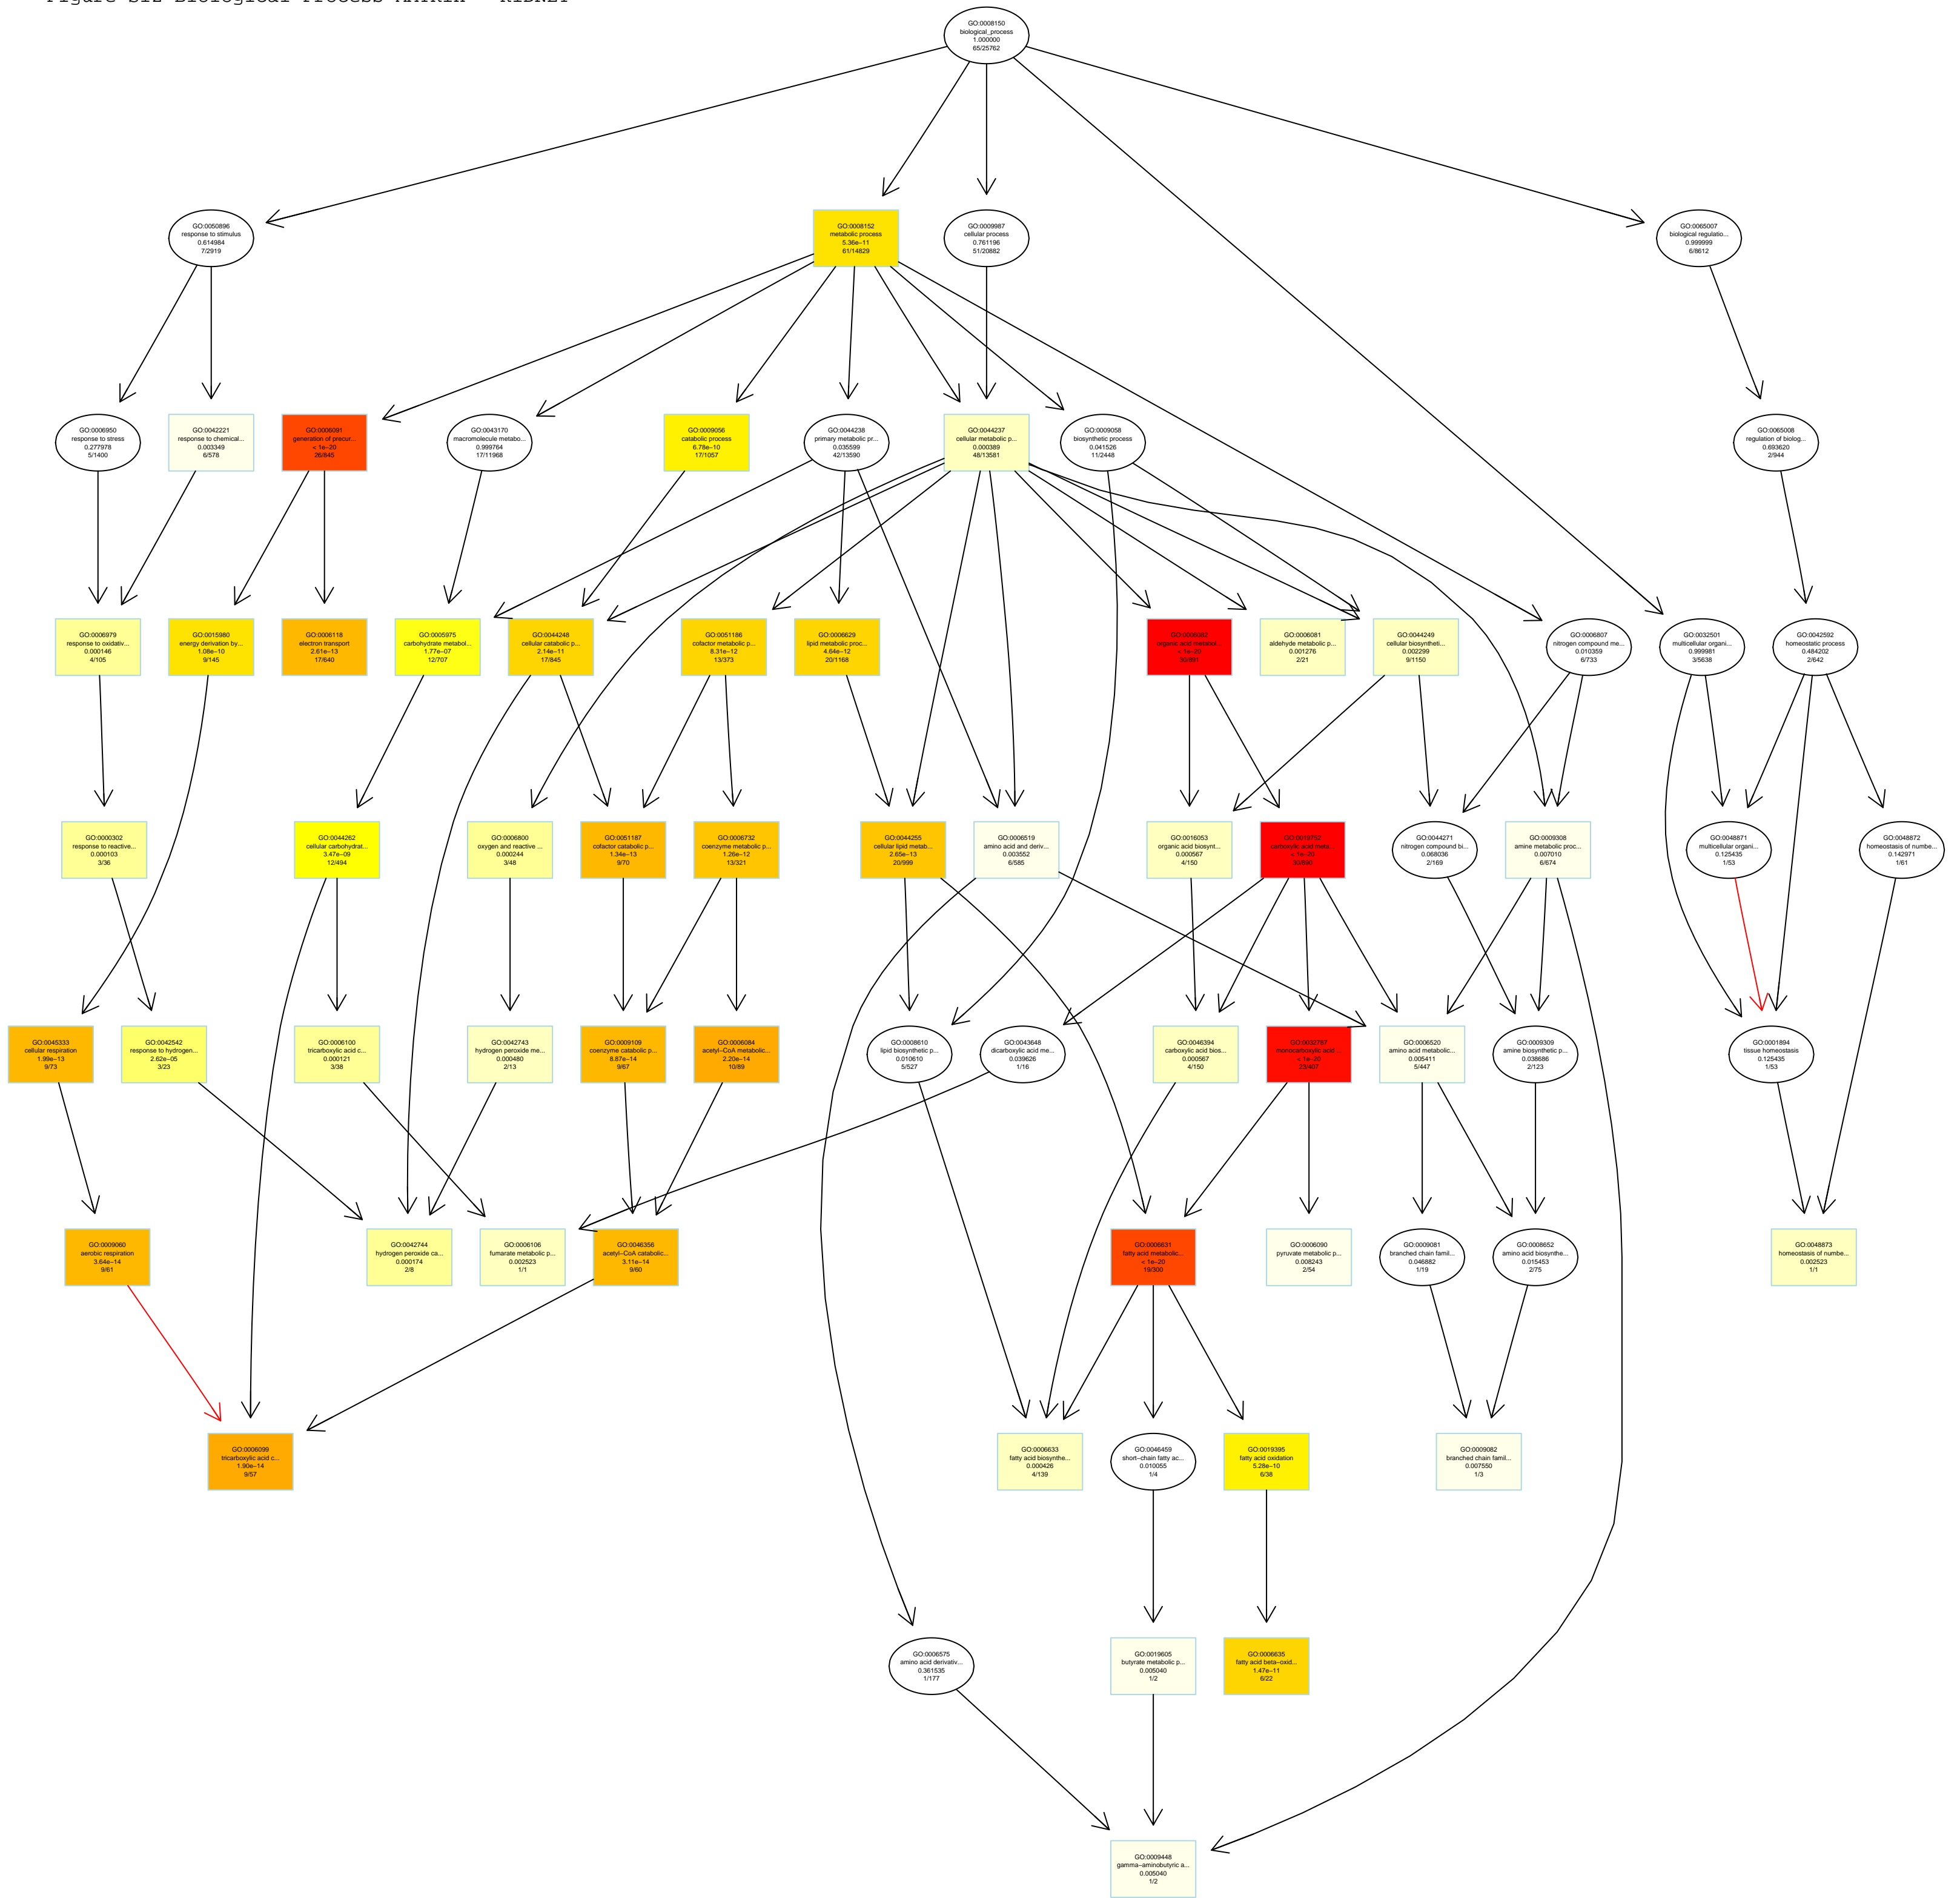

Figure S13 Cellular Location MEMBRANE - KIDNEY

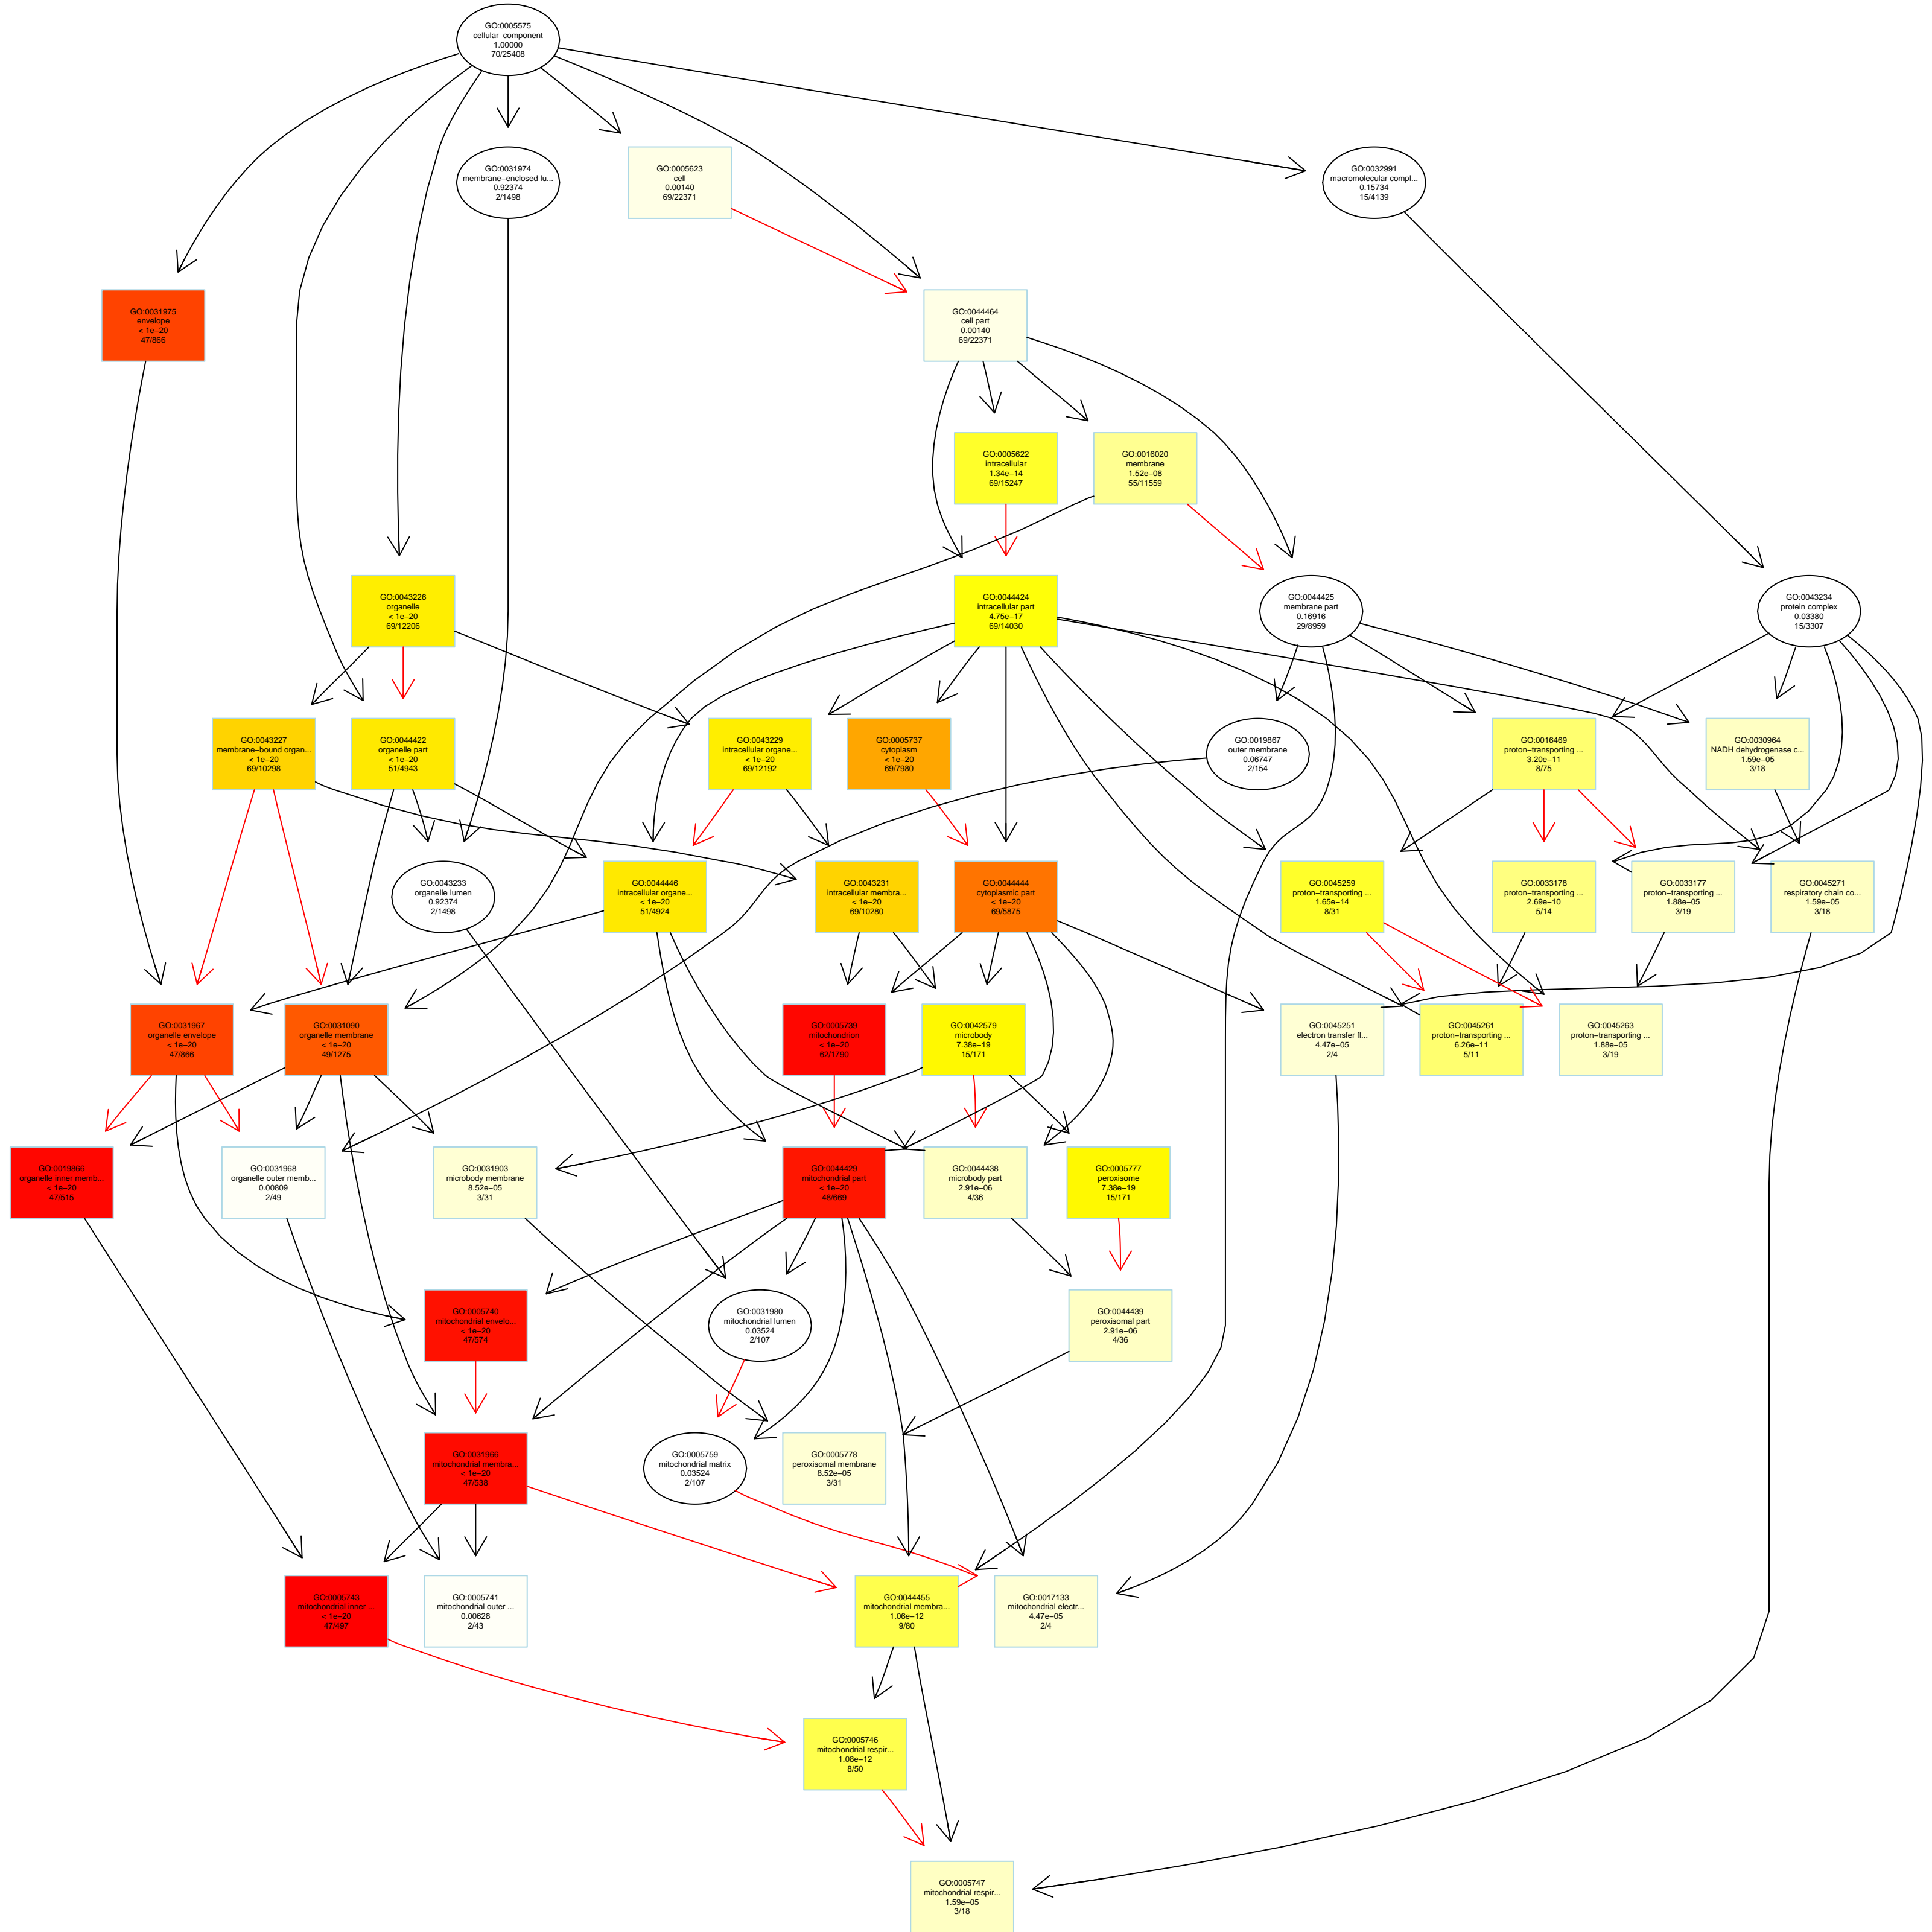

Figure S13 Molecular Function MEMBRANE - KIDNEY

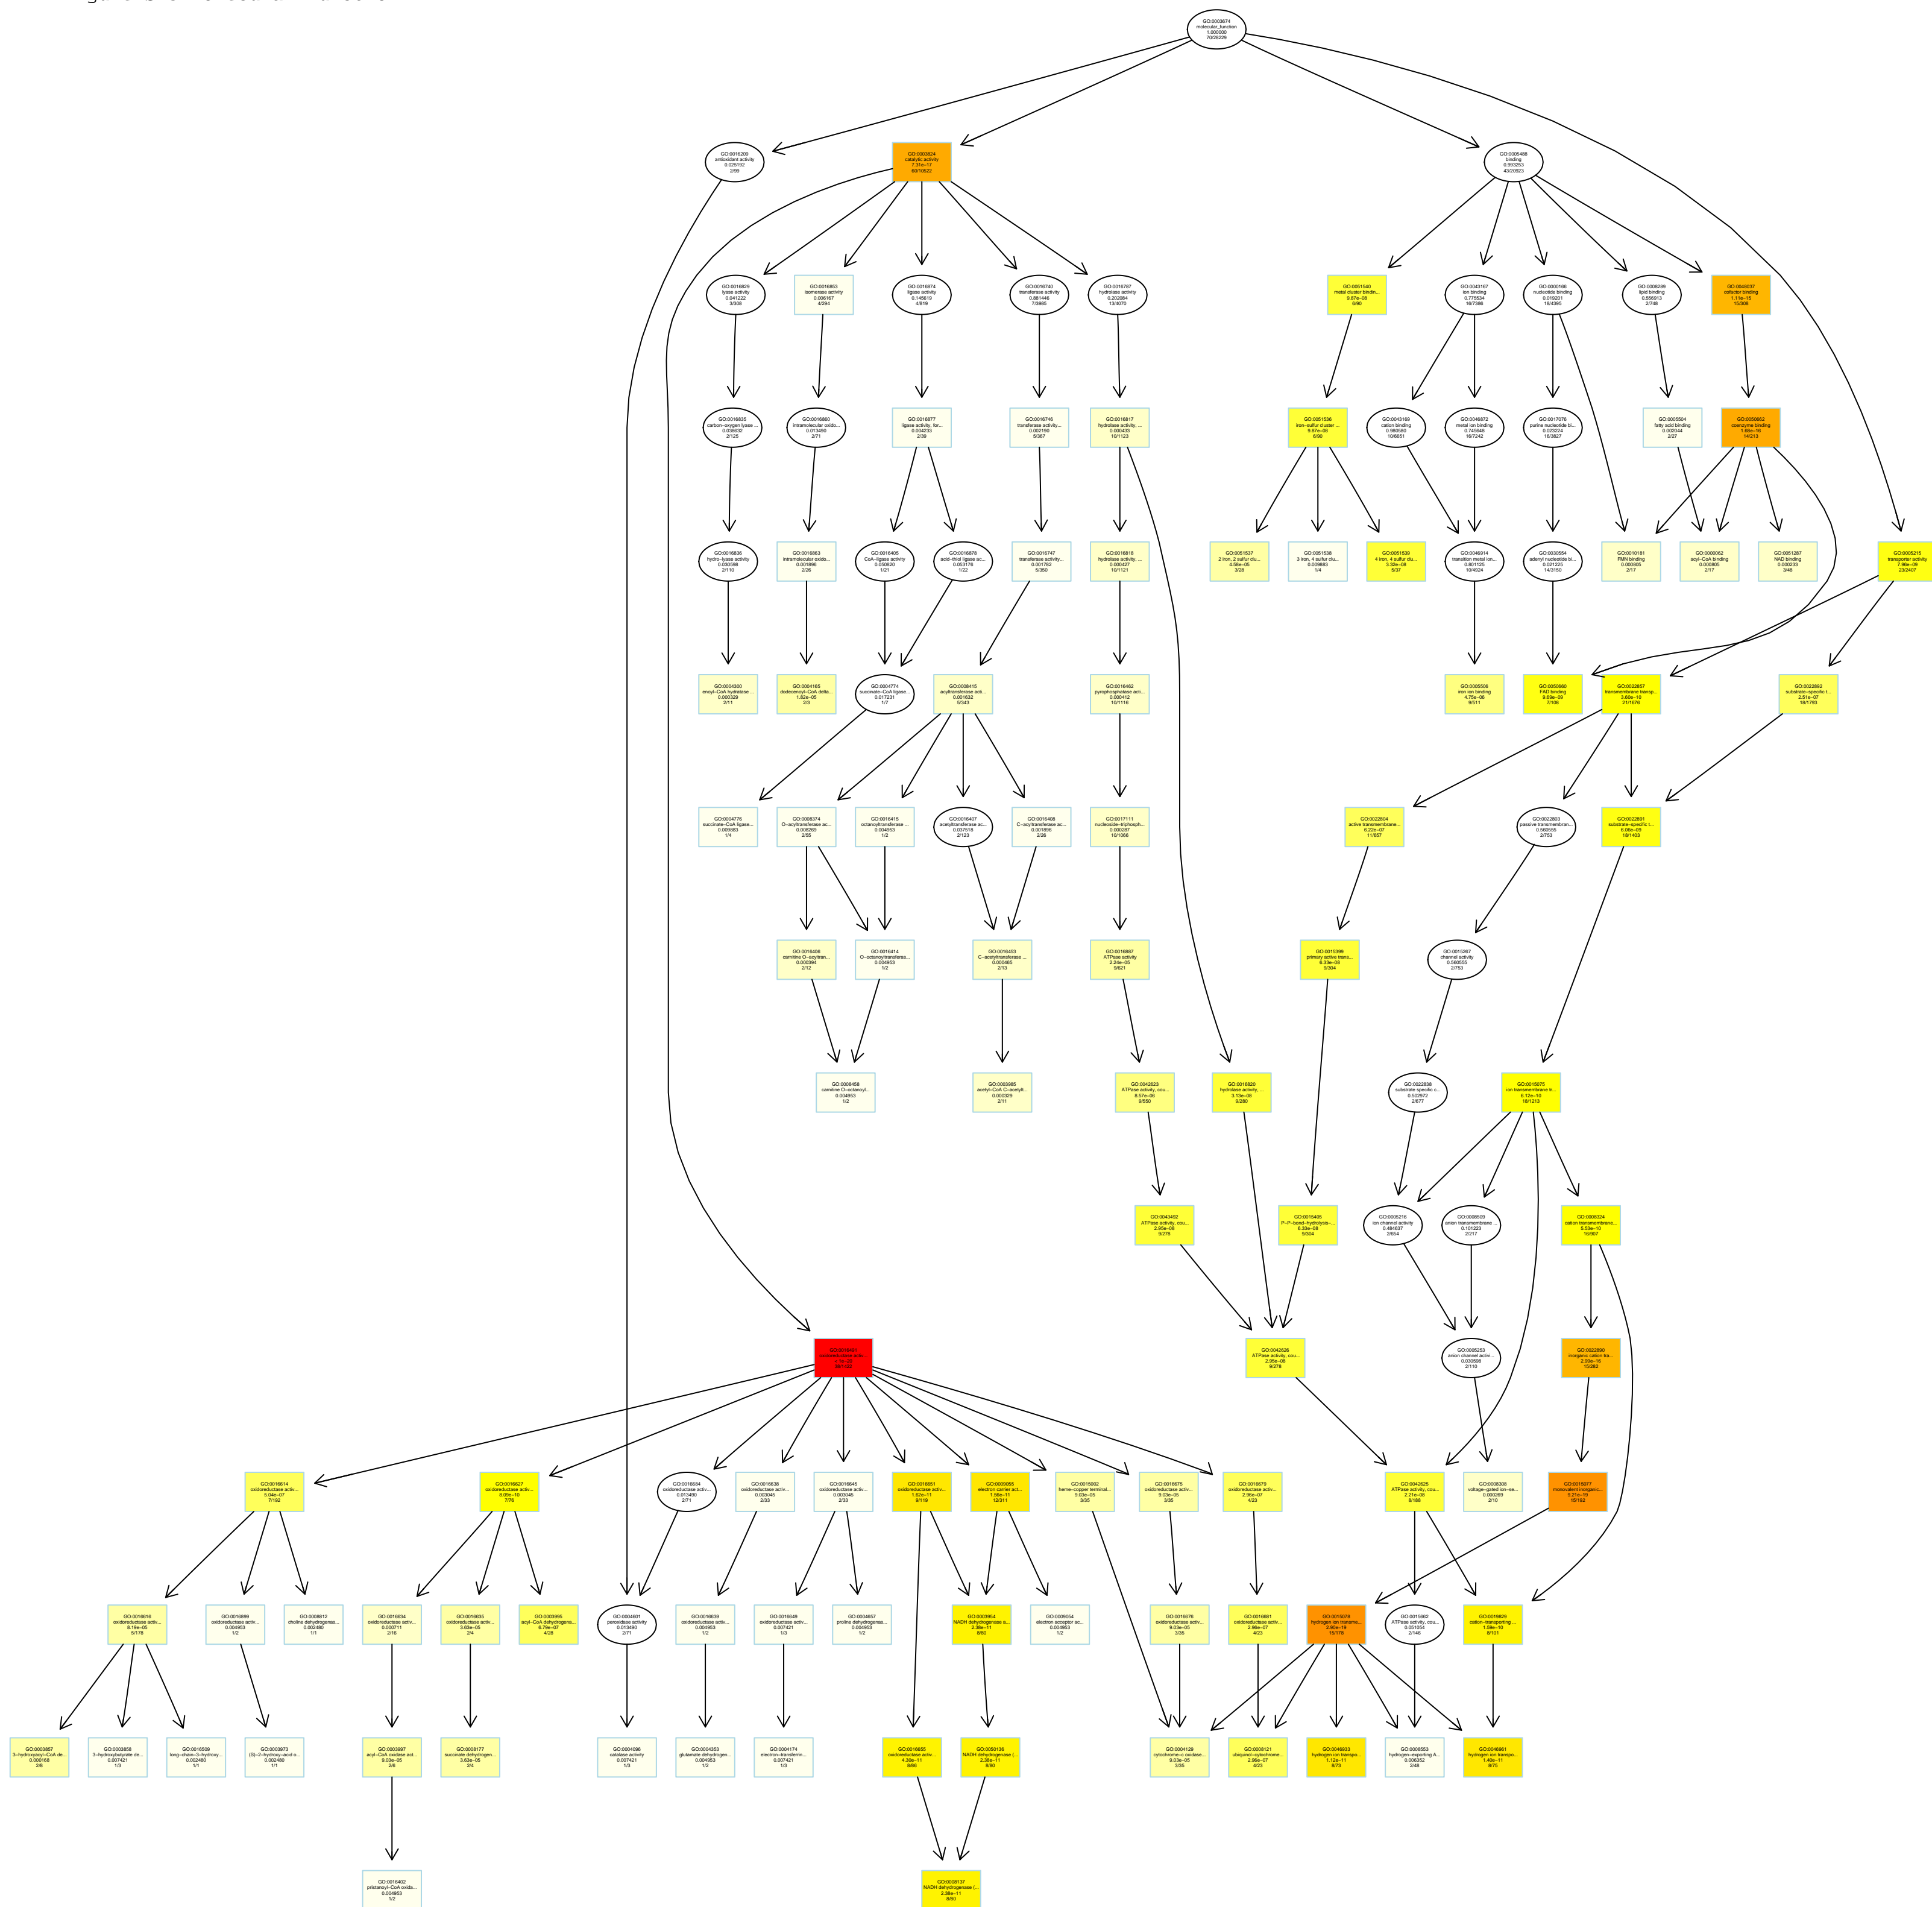

Figure S13 Biological Process MEMBRANE - KIDNEY

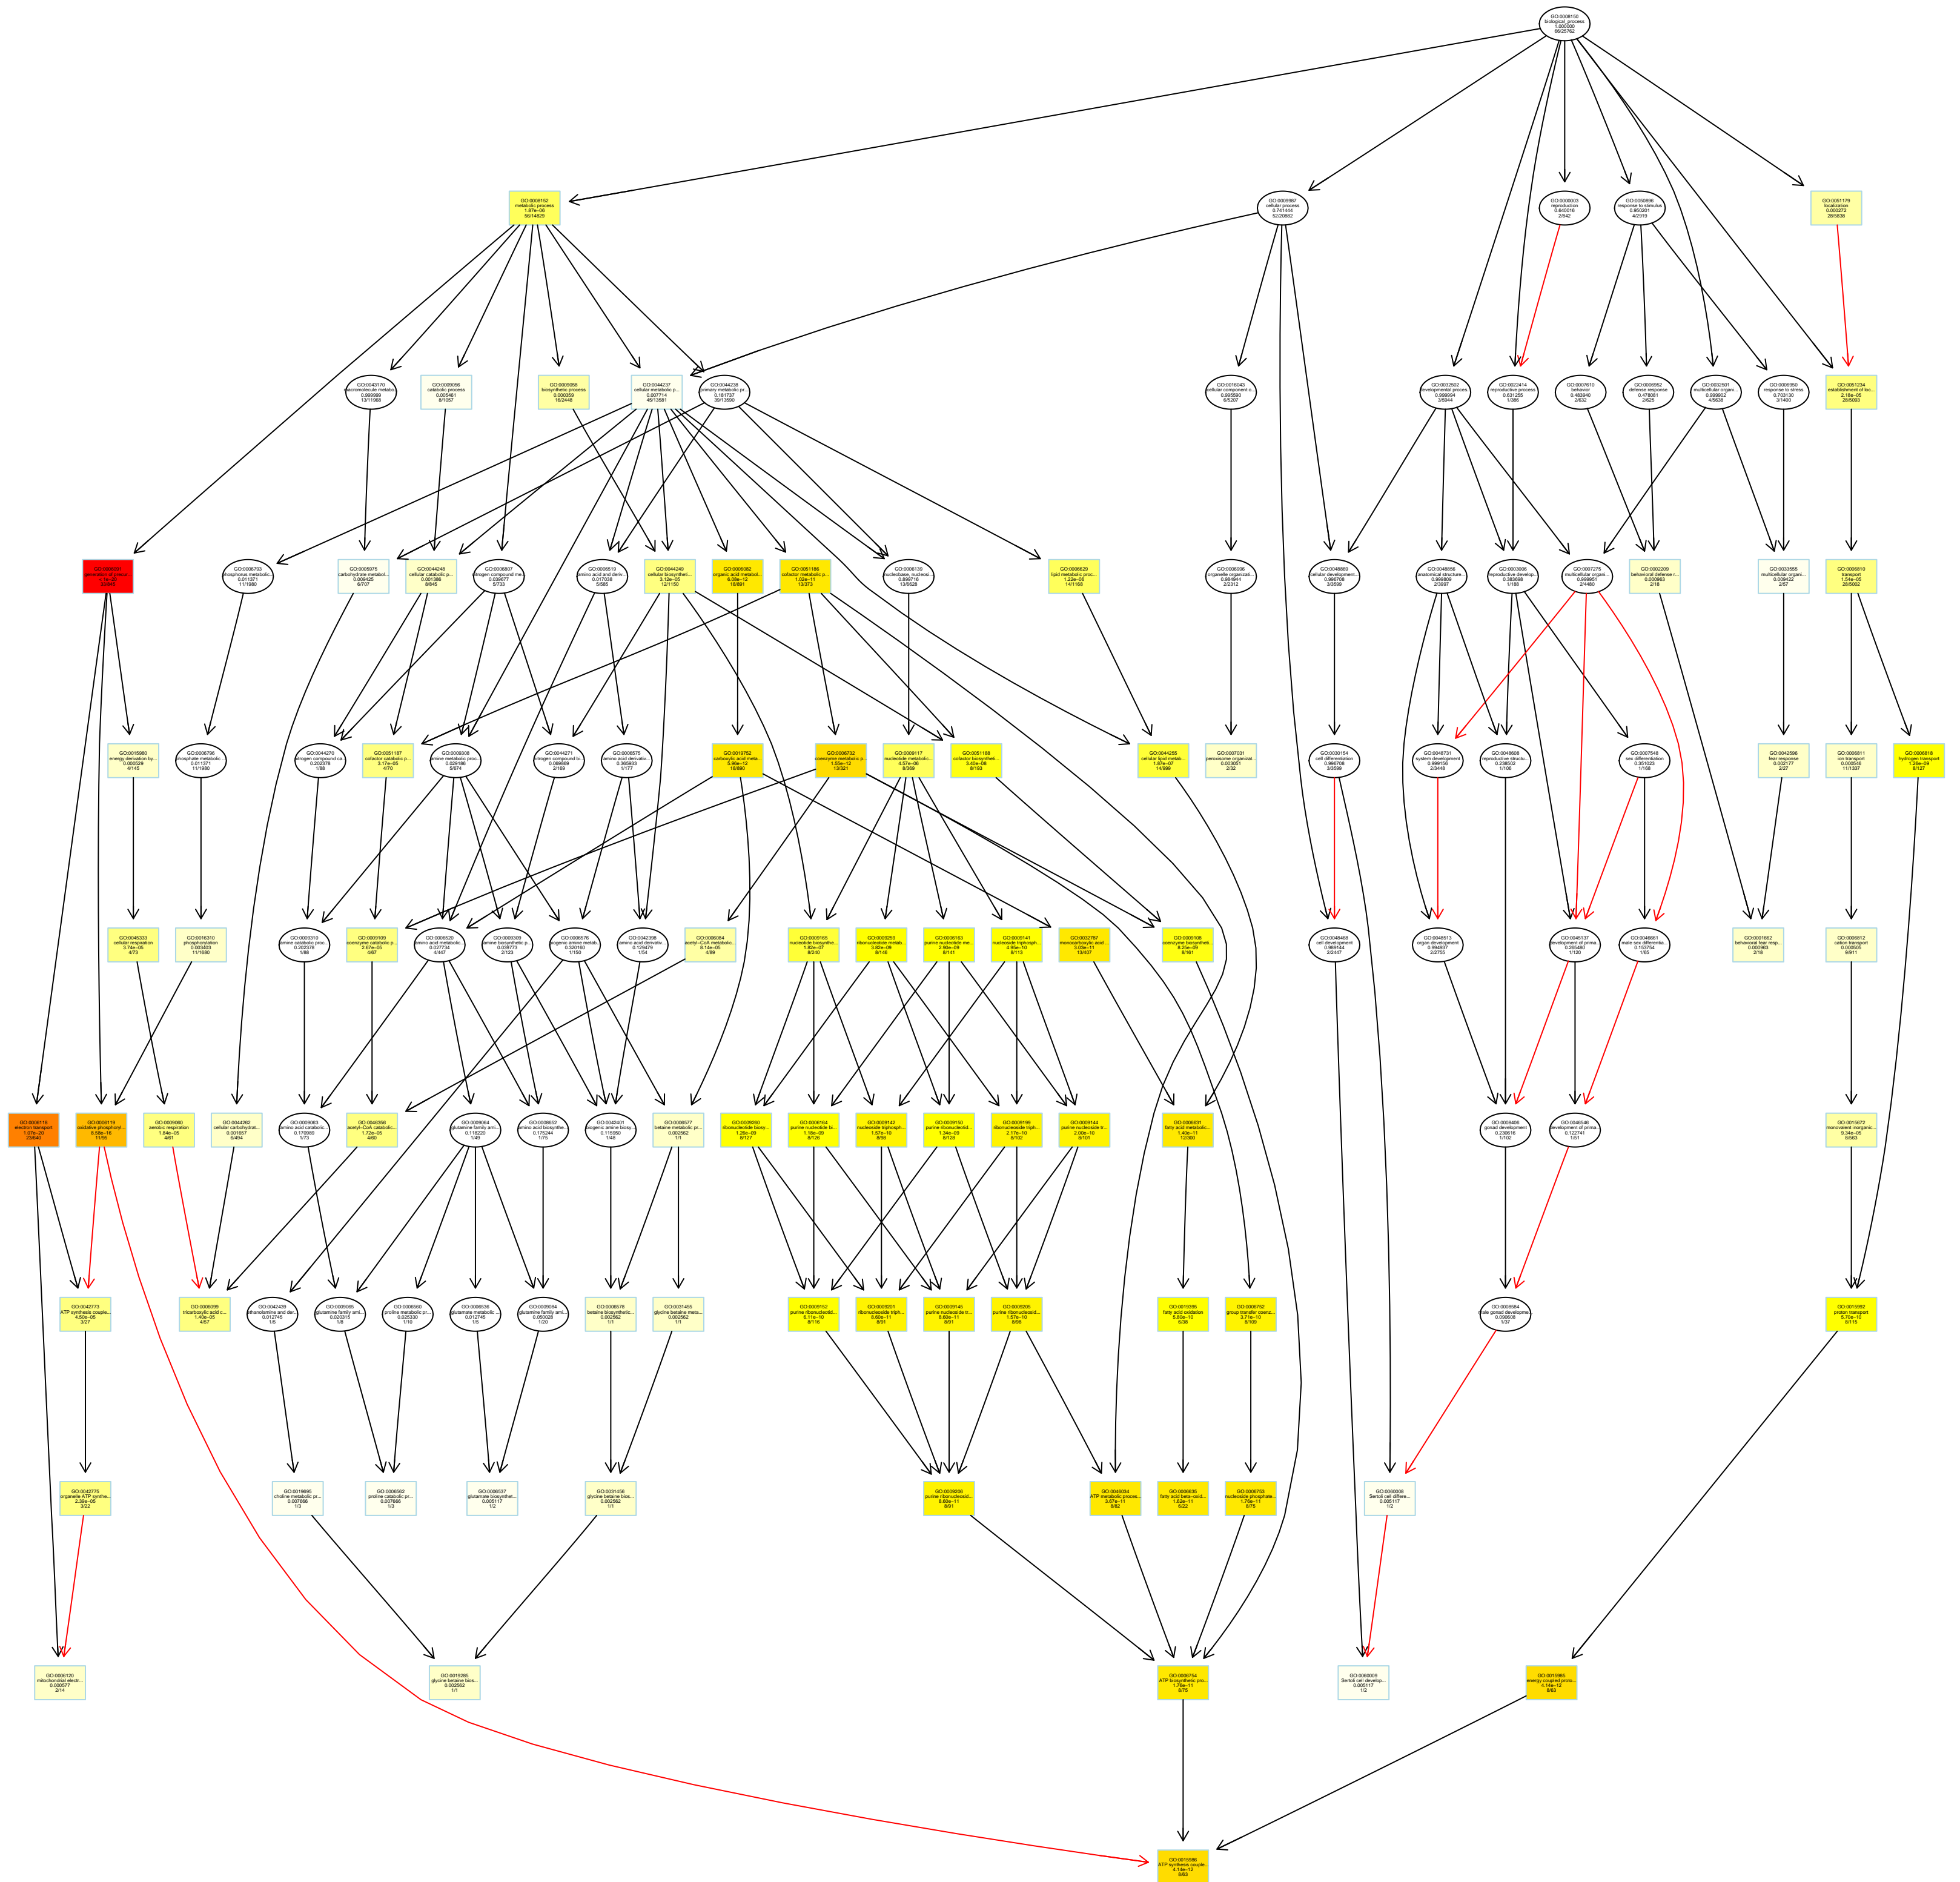

Supplement: supp_db09-0259_SupplementalFiguresS4-S13.pdf [file supp_db09-0259_SupplementalFiguresS4-S13.pdf]
