# Supplementary material for: Tissue-Specific Remodeling of the Mitochondrial Proteome in Type 1 Diabetic Akita Mice
Source: Oxford University Press journal article supplement (doi:10.2337/db09-0259), 2009-06-19
Supplement: db090259-sup-supplementaltable_s2.xls [file db090259-sup-supplementaltable_s2.xls]

## Sheet: GO Terms Akita Matrix
Accession	Description	Score	Diabetic:WT (Liver)	p value (significant <0.05 or >0.95)	Diabetic:WT (Brain)	p value (significant <0.05 or >0.95)	Diabetic:WT (Heart)	p value (significant <0.05 or >0.95)	Diabetic:WT (Kidney)	p value (significant <0.05 or >0.95)	gi	uniprot	Category	GO-ID	GO-Term
NP_032282.2	3-hydroxy-3-methylglutaryl-Coenzyme A synthase 2 [Mus musculus]	1235.87	1.01	0.54							31560689	P54869	Molecular Function	GO:0004421	hydroxymethylglutaryl-CoA synthase activity
NP_032282.2	3-hydroxy-3-methylglutaryl-Coenzyme A synthase 2 [Mus musculus]	1235.87	1.01	0.54							31560689	P54869	Molecular Function	GO:0016740	transferase activity
NP_032282.2	3-hydroxy-3-methylglutaryl-Coenzyme A synthase 2 [Mus musculus]	1235.87	1.01	0.54							31560689	P54869	Biological Process	GO:0006084	acetyl-CoA metabolic process
NP_032282.2	3-hydroxy-3-methylglutaryl-Coenzyme A synthase 2 [Mus musculus]	1235.87	1.01	0.54							31560689	P54869	Biological Process	GO:0006695	cholesterol biosynthetic process
NP_032282.2	3-hydroxy-3-methylglutaryl-Coenzyme A synthase 2 [Mus musculus]	1235.87	1.01	0.54							31560689	P54869	Cellular Location	GO:0005739	mitochondrion
NP_032282.2	3-hydroxy-3-methylglutaryl-Coenzyme A synthase 2 [Mus musculus]	1235.87	1.01	0.54							31560689	P54869	Cellular Location	GO:0005743	mitochondrial inner membrane
NP_666342.1	3-ketoacyl-CoA thiolase B [Mus musculus]	1323.28	0.68	0					0.769231	0.95	22122797	Q3UKM0	Molecular Function	GO:0003985	acetyl-CoA C-acetyltransferase activity
NP_666342.1	3-ketoacyl-CoA thiolase B [Mus musculus]	1323.28	0.68	0					0.769231	0.95	22122797	Q3UKM0	Molecular Function	GO:0003988	acetyl-CoA C-acyltransferase activity
NP_666342.1	3-ketoacyl-CoA thiolase B [Mus musculus]	1323.28	0.68	0					0.769231	0.95	22122797	Q3UKM0	Molecular Function	GO:0008415	acyltransferase activity
NP_666342.1	3-ketoacyl-CoA thiolase B [Mus musculus]	1323.28	0.68	0					0.769231	0.95	22122797	Q3UKM0	Molecular Function	GO:0016740	transferase activity
NP_666342.1	3-ketoacyl-CoA thiolase B [Mus musculus]	1323.28	0.68	0					0.769231	0.95	22122797	Q3UKM0	Biological Process	GO:0006631	fatty acid metabolic process
NP_666342.1	3-ketoacyl-CoA thiolase B [Mus musculus]	1323.28	0.68	0					0.769231	0.95	22122797	Q3UKM0	Cellular Location	GO:0005777	peroxisome
NP_061359.2	3-monooxgenase/tryptophan 5-monooxygenase activation protein, gamma polypeptide [Mus musculus]	365.64			0.990099	0.56					31543976	P61982	Molecular Function	GO:0003779	actin binding
NP_061359.2	3-monooxgenase/tryptophan 5-monooxygenase activation protein, gamma polypeptide [Mus musculus]	365.64			0.990099	0.56					31543976	P61982	Molecular Function	GO:0005080	protein kinase C binding
NP_061359.2	3-monooxgenase/tryptophan 5-monooxygenase activation protein, gamma polypeptide [Mus musculus]	365.64			0.990099	0.56					31543976	P61982	Molecular Function	GO:0005159	insulin-like growth factor receptor binding
NP_061359.2	3-monooxgenase/tryptophan 5-monooxygenase activation protein, gamma polypeptide [Mus musculus]	365.64			0.990099	0.56					31543976	P61982	Molecular Function	GO:0008047	enzyme activator activity
NP_061359.2	3-monooxgenase/tryptophan 5-monooxygenase activation protein, gamma polypeptide [Mus musculus]	365.64			0.990099	0.56					31543976	P61982	Molecular Function	GO:0008426	protein kinase C inhibitor activity
NP_061359.2	3-monooxgenase/tryptophan 5-monooxygenase activation protein, gamma polypeptide [Mus musculus]	365.64			0.990099	0.56					31543976	P61982	Molecular Function	GO:0019904	protein domain specific binding
NP_061359.2	3-monooxgenase/tryptophan 5-monooxygenase activation protein, gamma polypeptide [Mus musculus]	365.64			0.990099	0.56					31543976	P61982	Biological Process	GO:0006469	negative regulation of protein kinase activity
NP_061359.2	3-monooxgenase/tryptophan 5-monooxygenase activation protein, gamma polypeptide [Mus musculus]	365.64			0.990099	0.56					31543976	P61982	Biological Process	GO:0006605	protein targeting
NP_061359.2	3-monooxgenase/tryptophan 5-monooxygenase activation protein, gamma polypeptide [Mus musculus]	365.64			0.990099	0.56					31543976	P61982	Biological Process	GO:0007242	intracellular signaling cascade
NP_061359.2	3-monooxgenase/tryptophan 5-monooxygenase activation protein, gamma polypeptide [Mus musculus]	365.64			0.990099	0.56					31543976	P61982	Biological Process	GO:0009966	regulation of signal transduction
NP_061359.2	3-monooxgenase/tryptophan 5-monooxygenase activation protein, gamma polypeptide [Mus musculus]	365.64			0.990099	0.56					31543976	P61982	Biological Process	GO:0045664	regulation of neuron differentiation
NP_061359.2	3-monooxgenase/tryptophan 5-monooxygenase activation protein, gamma polypeptide [Mus musculus]	365.64			0.990099	0.56					31543976	P61982	Biological Process	GO:0048167	regulation of synaptic plasticity
NP_077150.1	3-oxoacid CoA transferase 1 [Mus musculus]	1856.95			1.14943	0.05	0.884956	0.92	1.19048	0	18266680	Q9D0K2	Molecular Function	GO:0008260	3-oxoacid CoA-transferase activity
NP_077150.1	3-oxoacid CoA transferase 1 [Mus musculus]	1856.95			1.14943	0.05	0.884956	0.92	1.19048	0	18266680	Q9D0K2	Molecular Function	GO:0016740	transferase activity
NP_077150.1	3-oxoacid CoA transferase 1 [Mus musculus]	1856.95			1.14943	0.05	0.884956	0.92	1.19048	0	18266680	Q9D0K2	Biological Process	GO:0006104	succinyl-CoA metabolic process
NP_077150.1	3-oxoacid CoA transferase 1 [Mus musculus]	1856.95			1.14943	0.05	0.884956	0.92	1.19048	0	18266680	Q9D0K2	Biological Process	GO:0008152	metabolic process
NP_077150.1	3-oxoacid CoA transferase 1 [Mus musculus]	1856.95			1.14943	0.05	0.884956	0.92	1.19048	0	18266680	Q9D0K2	Biological Process	GO:0046950	ketone body metabolic process
NP_077150.1	3-oxoacid CoA transferase 1 [Mus musculus]	1856.95			1.14943	0.05	0.884956	0.92	1.19048	0	18266680	Q9D0K2	Cellular Location	GO:0005615	extracellular space
NP_077150.1	3-oxoacid CoA transferase 1 [Mus musculus]	1856.95			1.14943	0.05	0.884956	0.92	1.19048	0	18266680	Q9D0K2	Cellular Location	GO:0005739	mitochondrion
NP_766549.2	4-aminobutyrate aminotransferase [Mus musculus]	952.94	1.04	0.63	1.11111	0.02			1.0989	0.19	37202121	P61922	Molecular Function	GO:0003867	4-aminobutyrate transaminase activity
NP_766549.2	4-aminobutyrate aminotransferase [Mus musculus]	952.94	1.04	0.63	1.11111	0.02			1.0989	0.19	37202121	P61922	Molecular Function	GO:0016740	transferase activity
NP_766549.2	4-aminobutyrate aminotransferase [Mus musculus]	952.94	1.04	0.63	1.11111	0.02			1.0989	0.19	37202121	P61922	Molecular Function	GO:0030170	pyridoxal phosphate binding
NP_766549.2	4-aminobutyrate aminotransferase [Mus musculus]	952.94	1.04	0.63	1.11111	0.02			1.0989	0.19	37202121	P61922	Molecular Function	GO:0032145	succinate-semialdehyde dehydrogenase binding
NP_766549.2	4-aminobutyrate aminotransferase [Mus musculus]	952.94	1.04	0.63	1.11111	0.02			1.0989	0.19	37202121	P61922	Molecular Function	GO:0042803	protein homodimerization activity
NP_766549.2	4-aminobutyrate aminotransferase [Mus musculus]	952.94	1.04	0.63	1.11111	0.02			1.0989	0.19	37202121	P61922	Molecular Function	GO:0047298	(S)-3-amino-2-methylpropionate transaminase activity
NP_766549.2	4-aminobutyrate aminotransferase [Mus musculus]	952.94	1.04	0.63	1.11111	0.02			1.0989	0.19	37202121	P61922	Biological Process	GO:0009448	gamma-aminobutyric acid metabolic process
NP_766549.2	4-aminobutyrate aminotransferase [Mus musculus]	952.94	1.04	0.63	1.11111	0.02			1.0989	0.19	37202121	P61922	Biological Process	GO:0042135	neurotransmitter catabolic process
NP_766549.2	4-aminobutyrate aminotransferase [Mus musculus]	952.94	1.04	0.63	1.11111	0.02			1.0989	0.19	37202121	P61922	Biological Process	GO:0048148	behavioral response to cocaine
NP_766549.2	4-aminobutyrate aminotransferase [Mus musculus]	952.94	1.04	0.63	1.11111	0.02			1.0989	0.19	37202121	P61922	Cellular Location	GO:0005739	mitochondrion
NP_766549.2	4-aminobutyrate aminotransferase [Mus musculus]	952.94	1.04	0.63	1.11111	0.02			1.0989	0.19	37202121	P61922	Cellular Location	GO:0032144	4-aminobutyrate transaminase complex
NP_659033.1	acetyl-Coenzyme A acetyltransferase 1 precursor [Mus musculus]	1326.3	0.69	0	0.925926	0.82	0.980392	0.55	0.769231	1	21450129	Q8QZT1	Molecular Function	GO:0003985	acetyl-CoA C-acetyltransferase activity
NP_659033.1	acetyl-Coenzyme A acetyltransferase 1 precursor [Mus musculus]	1326.3	0.69	0	0.925926	0.82	0.980392	0.55	0.769231	1	21450129	Q8QZT1	Molecular Function	GO:0008415	acyltransferase activity
NP_659033.1	acetyl-Coenzyme A acetyltransferase 1 precursor [Mus musculus]	1326.3	0.69	0	0.925926	0.82	0.980392	0.55	0.769231	1	21450129	Q8QZT1	Molecular Function	GO:0016740	transferase activity
NP_659033.1	acetyl-Coenzyme A acetyltransferase 1 precursor [Mus musculus]	1326.3	0.69	0	0.925926	0.82	0.980392	0.55	0.769231	1	21450129	Q8QZT1	Cellular Location	GO:0005739	mitochondrion
NP_659033.1	acetyl-Coenzyme A acetyltransferase 1 precursor [Mus musculus]	1326.3	0.69	0	0.925926	0.82	0.980392	0.55	0.769231	1	21450129	Q8QZT1	Cellular Location	GO:0005743	mitochondrial inner membrane
NP_570934.1	acetyl-Coenzyme A acyltransferase 1 [Mus musculus]	1184.81	0.68	0					0.763359	0.96	18700004	Q921H8	Molecular Function	GO:0003985	acetyl-CoA C-acetyltransferase activity
NP_570934.1	acetyl-Coenzyme A acyltransferase 1 [Mus musculus]	1184.81	0.68	0					0.763359	0.96	18700004	Q921H8	Molecular Function	GO:0003988	acetyl-CoA C-acyltransferase activity
NP_570934.1	acetyl-Coenzyme A acyltransferase 1 [Mus musculus]	1184.81	0.68	0					0.763359	0.96	18700004	Q921H8	Molecular Function	GO:0008415	acyltransferase activity
NP_570934.1	acetyl-Coenzyme A acyltransferase 1 [Mus musculus]	1184.81	0.68	0					0.763359	0.96	18700004	Q921H8	Molecular Function	GO:0016740	transferase activity
NP_570934.1	acetyl-Coenzyme A acyltransferase 1 [Mus musculus]	1184.81	0.68	0					0.763359	0.96	18700004	Q921H8	Biological Process	GO:0006629	lipid metabolic process
NP_570934.1	acetyl-Coenzyme A acyltransferase 1 [Mus musculus]	1184.81	0.68	0					0.763359	0.96	18700004	Q921H8	Biological Process	GO:0006631	fatty acid metabolic process
NP_570934.1	acetyl-Coenzyme A acyltransferase 1 [Mus musculus]	1184.81	0.68	0					0.763359	0.96	18700004	Q921H8	Cellular Location	GO:0005777	peroxisome
NP_803421.1	acetyl-Coenzyme A acyltransferase 2 (mitochondrial 3-oxoacyl-Coenzyme A thiolase) [Mus musculus]	3060.42	0.75	0	1.26582	0.02	1.40845	0	1.69492	0	29126205	Q3TIT9	Molecular Function	GO:0003988	acetyl-CoA C-acyltransferase activity
NP_803421.1	acetyl-Coenzyme A acyltransferase 2 (mitochondrial 3-oxoacyl-Coenzyme A thiolase) [Mus musculus]	3060.42	0.75	0	1.26582	0.02	1.40845	0	1.69492	0	29126205	Q3TIT9	Molecular Function	GO:0008415	acyltransferase activity
NP_803421.1	acetyl-Coenzyme A acyltransferase 2 (mitochondrial 3-oxoacyl-Coenzyme A thiolase) [Mus musculus]	3060.42	0.75	0	1.26582	0.02	1.40845	0	1.69492	0	29126205	Q3TIT9	Molecular Function	GO:0016740	transferase activity
NP_803421.1	acetyl-Coenzyme A acyltransferase 2 (mitochondrial 3-oxoacyl-Coenzyme A thiolase) [Mus musculus]	3060.42	0.75	0	1.26582	0.02	1.40845	0	1.69492	0	29126205	Q3TIT9	Biological Process	GO:0006631	fatty acid metabolic process
NP_803421.1	acetyl-Coenzyme A acyltransferase 2 (mitochondrial 3-oxoacyl-Coenzyme A thiolase) [Mus musculus]	3060.42	0.75	0	1.26582	0.02	1.40845	0	1.69492	0	29126205	Q3TIT9	Cellular Location	GO:0005739	mitochondrion
NP_803421.1	acetyl-Coenzyme A acyltransferase 2 (mitochondrial 3-oxoacyl-Coenzyme A thiolase) [Mus musculus]	3060.42	0.75	0	1.26582	0.02	1.40845	0	1.69492	0	29126205	Q3TIT9	Cellular Location	GO:0005743	mitochondrial inner membrane
NP_031407.2	acetyl-Coenzyme A dehydrogenase, long-chain [Mus musculus]	758.76	0.89	0.13	1.25	0.03	1.13636	0	1.17647	0.01	31982520	P51174	Molecular Function	GO:0004466	long-chain-acyl-CoA dehydrogenase activity
NP_031407.2	acetyl-Coenzyme A dehydrogenase, long-chain [Mus musculus]	758.76	0.89	0.13	1.25	0.03	1.13636	0	1.17647	0.01	31982520	P51174	Molecular Function	GO:0050660	FAD binding
NP_031407.2	acetyl-Coenzyme A dehydrogenase, long-chain [Mus musculus]	758.76	0.89	0.13	1.25	0.03	1.13636	0	1.17647	0.01	31982520	P51174	Biological Process	GO:0006118	electron transport
NP_031407.2	acetyl-Coenzyme A dehydrogenase, long-chain [Mus musculus]	758.76	0.89	0.13	1.25	0.03	1.13636	0	1.17647	0.01	31982520	P51174	Biological Process	GO:0006629	lipid metabolic process
NP_031407.2	acetyl-Coenzyme A dehydrogenase, long-chain [Mus musculus]	758.76	0.89	0.13	1.25	0.03	1.13636	0	1.17647	0.01	31982520	P51174	Biological Process	GO:0006631	fatty acid metabolic process
NP_031407.2	acetyl-Coenzyme A dehydrogenase, long-chain [Mus musculus]	758.76	0.89	0.13	1.25	0.03	1.13636	0	1.17647	0.01	31982520	P51174	Biological Process	GO:0008152	metabolic process
NP_031407.2	acetyl-Coenzyme A dehydrogenase, long-chain [Mus musculus]	758.76	0.89	0.13	1.25	0.03	1.13636	0	1.17647	0.01	31982520	P51174	Cellular Location	GO:0005615	extracellular space
NP_031407.2	acetyl-Coenzyme A dehydrogenase, long-chain [Mus musculus]	758.76	0.89	0.13	1.25	0.03	1.13636	0	1.17647	0.01	31982520	P51174	Cellular Location	GO:0005739	mitochondrion
NP_031408.1	acetyl-Coenzyme A dehydrogenase, medium chain [Mus musculus]	726.69	0.96	0.36	1.1236	0.33	1.03093	0.25	0.943396	0.91	6680618	P45952	Molecular Function	GO:0003995	acyl-CoA dehydrogenase activity
NP_031408.1	acetyl-Coenzyme A dehydrogenase, medium chain [Mus musculus]	726.69	0.96	0.36	1.1236	0.33	1.03093	0.25	0.943396	0.91	6680618	P45952	Molecular Function	GO:0050660	FAD binding
NP_031408.1	acetyl-Coenzyme A dehydrogenase, medium chain [Mus musculus]	726.69	0.96	0.36	1.1236	0.33	1.03093	0.25	0.943396	0.91	6680618	P45952	Biological Process	GO:0006118	electron transport
NP_031408.1	acetyl-Coenzyme A dehydrogenase, medium chain [Mus musculus]	726.69	0.96	0.36	1.1236	0.33	1.03093	0.25	0.943396	0.91	6680618	P45952	Biological Process	GO:0006629	lipid metabolic process
NP_031408.1	acetyl-Coenzyme A dehydrogenase, medium chain [Mus musculus]	726.69	0.96	0.36	1.1236	0.33	1.03093	0.25	0.943396	0.91	6680618	P45952	Biological Process	GO:0006631	fatty acid metabolic process
NP_031408.1	acetyl-Coenzyme A dehydrogenase, medium chain [Mus musculus]	726.69	0.96	0.36	1.1236	0.33	1.03093	0.25	0.943396	0.91	6680618	P45952	Biological Process	GO:0006635	fatty acid beta-oxidation
NP_031408.1	acetyl-Coenzyme A dehydrogenase, medium chain [Mus musculus]	726.69	0.96	0.36	1.1236	0.33	1.03093	0.25	0.943396	0.91	6680618	P45952	Biological Process	GO:0008152	metabolic process
NP_031408.1	acetyl-Coenzyme A dehydrogenase, medium chain [Mus musculus]	726.69	0.96	0.36	1.1236	0.33	1.03093	0.25	0.943396	0.91	6680618	P45952	Cellular Location	GO:0005739	mitochondrion
NP_031408.1	acetyl-Coenzyme A dehydrogenase, medium chain [Mus musculus]	726.69	0.96	0.36	1.1236	0.33	1.03093	0.25	0.943396	0.91	6680618	P45952	Cellular Location	GO:0005759	mitochondrial matrix
NP_542364.1	aconitase 2, mitochondrial [Mus musculus]	1541.18	1.07	0.87	1	0.53	0.961538	0.93	1.31579	0	18079339	Q99KI0	Molecular Function	GO:0003994	aconitate hydratase activity
NP_542364.1	aconitase 2, mitochondrial [Mus musculus]	1541.18	1.07	0.87	1	0.53	0.961538	0.93	1.31579	0	18079339	Q99KI0	Molecular Function	GO:0005506	iron ion binding
NP_542364.1	aconitase 2, mitochondrial [Mus musculus]	1541.18	1.07	0.87	1	0.53	0.961538	0.93	1.31579	0	18079339	Q99KI0	Molecular Function	GO:0016829	lyase activity
NP_542364.1	aconitase 2, mitochondrial [Mus musculus]	1541.18	1.07	0.87	1	0.53	0.961538	0.93	1.31579	0	18079339	Q99KI0	Molecular Function	GO:0046872	metal ion binding
NP_542364.1	aconitase 2, mitochondrial [Mus musculus]	1541.18	1.07	0.87	1	0.53	0.961538	0.93	1.31579	0	18079339	Q99KI0	Molecular Function	GO:0051539	4 iron, 4 sulfur cluster binding
NP_542364.1	aconitase 2, mitochondrial [Mus musculus]	1541.18	1.07	0.87	1	0.53	0.961538	0.93	1.31579	0	18079339	Q99KI0	Biological Process	GO:0006099	tricarboxylic acid cycle
NP_542364.1	aconitase 2, mitochondrial [Mus musculus]	1541.18	1.07	0.87	1	0.53	0.961538	0.93	1.31579	0	18079339	Q99KI0	Biological Process	GO:0006101	citrate metabolic process
NP_542364.1	aconitase 2, mitochondrial [Mus musculus]	1541.18	1.07	0.87	1	0.53	0.961538	0.93	1.31579	0	18079339	Q99KI0	Biological Process	GO:0008152	metabolic process
NP_542364.1	aconitase 2, mitochondrial [Mus musculus]	1541.18	1.07	0.87	1	0.53	0.961538	0.93	1.31579	0	18079339	Q99KI0	Cellular Location	GO:0005739	mitochondrion
NP_666309.1	acyl-CoA synthetase medium-chain family member 2 [Mus musculus]	3831.84							0.925926	1	22122743	Q8K0L3	Molecular Function	GO:0003824	catalytic activity
NP_666309.1	acyl-CoA synthetase medium-chain family member 2 [Mus musculus]	3831.84							0.925926	1	22122743	Q8K0L3	Biological Process	GO:0008152	metabolic process
NP_031409.2	acyl-Coenzyme A dehydrogenase, short chain [Mus musculus]	1088.76	0.76	0	1.44928	0.24	1.11111	0.18	1.03093	0.33	31982522	Q91W85	Molecular Function	GO:0003995	acyl-CoA dehydrogenase activity
NP_031409.2	acyl-Coenzyme A dehydrogenase, short chain [Mus musculus]	1088.76	0.76	0	1.44928	0.24	1.11111	0.18	1.03093	0.33	31982522	Q91W85	Molecular Function	GO:0050660	FAD binding
NP_031409.2	acyl-Coenzyme A dehydrogenase, short chain [Mus musculus]	1088.76	0.76	0	1.44928	0.24	1.11111	0.18	1.03093	0.33	31982522	Q91W85	Biological Process	GO:0006118	electron transport
NP_031409.2	acyl-Coenzyme A dehydrogenase, short chain [Mus musculus]	1088.76	0.76	0	1.44928	0.24	1.11111	0.18	1.03093	0.33	31982522	Q91W85	Biological Process	GO:0008152	metabolic process
NP_031409.2	acyl-Coenzyme A dehydrogenase, short chain [Mus musculus]	1088.76	0.76	0	1.44928	0.24	1.11111	0.18	1.03093	0.33	31982522	Q91W85	Cellular Location	GO:0005739	mitochondrion
NP_059062.1	acyl-Coenzyme A dehydrogenase, very long chain [Mus musculus]	737.76					1.03093	0.5
NP_056544.2	acyl-Coenzyme A oxidase 1, palmitoyl [Mus musculus]	2324.69	0.7	0					0.571429	1
NP_444345.1	acyl-Coenzyme A oxidase 2, branched chain [Mus musculus]	367.94	1.03	0.58					0.719424	0.93	16716411	Q9QXD1	Molecular Function	GO:0003995	acyl-CoA dehydrogenase activity
NP_444345.1	acyl-Coenzyme A oxidase 2, branched chain [Mus musculus]	367.94	1.03	0.58					0.719424	0.93	16716411	Q9QXD1	Molecular Function	GO:0003997	acyl-CoA oxidase activity
NP_444345.1	acyl-Coenzyme A oxidase 2, branched chain [Mus musculus]	367.94	1.03	0.58					0.719424	0.93	16716411	Q9QXD1	Molecular Function	GO:0050660	FAD binding
NP_444345.1	acyl-Coenzyme A oxidase 2, branched chain [Mus musculus]	367.94	1.03	0.58					0.719424	0.93	16716411	Q9QXD1	Biological Process	GO:0006118	electron transport
NP_444345.1	acyl-Coenzyme A oxidase 2, branched chain [Mus musculus]	367.94	1.03	0.58					0.719424	0.93	16716411	Q9QXD1	Biological Process	GO:0006629	lipid metabolic process
NP_444345.1	acyl-Coenzyme A oxidase 2, branched chain [Mus musculus]	367.94	1.03	0.58					0.719424	0.93	16716411	Q9QXD1	Biological Process	GO:0006631	fatty acid metabolic process
NP_444345.1	acyl-Coenzyme A oxidase 2, branched chain [Mus musculus]	367.94	1.03	0.58					0.719424	0.93	16716411	Q9QXD1	Biological Process	GO:0006635	fatty acid beta-oxidation
NP_444345.1	acyl-Coenzyme A oxidase 2, branched chain [Mus musculus]	367.94	1.03	0.58					0.719424	0.93	16716411	Q9QXD1	Biological Process	GO:0008152	metabolic process
NP_444345.1	acyl-Coenzyme A oxidase 2, branched chain [Mus musculus]	367.94	1.03	0.58					0.719424	0.93	16716411	Q9QXD1	Cellular Location	GO:0005777	peroxisome
NP_109646.2	acyl-Coenzyme A oxidase 3, pristanoyl [Mus musculus]	636.46							0.617284	0.98
NP_067274.1	adenylate kinase 3 [Mus musculus]	603.12	0.92	0.34	1.19048	0.17	0.917431	0.61	1.38889	0	23956104	Q9WTP7	Molecular Function	GO:0000166	nucleotide binding
NP_067274.1	adenylate kinase 3 [Mus musculus]	603.12	0.92	0.34	1.19048	0.17	0.917431	0.61	1.38889	0	23956104	Q9WTP7	Molecular Function	GO:0004017	adenylate kinase activity
NP_067274.1	adenylate kinase 3 [Mus musculus]	603.12	0.92	0.34	1.19048	0.17	0.917431	0.61	1.38889	0	23956104	Q9WTP7	Molecular Function	GO:0004765	shikimate kinase activity
NP_067274.1	adenylate kinase 3 [Mus musculus]	603.12	0.92	0.34	1.19048	0.17	0.917431	0.61	1.38889	0	23956104	Q9WTP7	Molecular Function	GO:0005524	ATP binding
NP_067274.1	adenylate kinase 3 [Mus musculus]	603.12	0.92	0.34	1.19048	0.17	0.917431	0.61	1.38889	0	23956104	Q9WTP7	Molecular Function	GO:0005525	GTP binding
NP_067274.1	adenylate kinase 3 [Mus musculus]	603.12	0.92	0.34	1.19048	0.17	0.917431	0.61	1.38889	0	23956104	Q9WTP7	Molecular Function	GO:0016740	transferase activity
NP_067274.1	adenylate kinase 3 [Mus musculus]	603.12	0.92	0.34	1.19048	0.17	0.917431	0.61	1.38889	0	23956104	Q9WTP7	Molecular Function	GO:0046899	nucleoside triphosphate adenylate kinase activity
NP_067274.1	adenylate kinase 3 [Mus musculus]	603.12	0.92	0.34	1.19048	0.17	0.917431	0.61	1.38889	0	23956104	Q9WTP7	Biological Process	GO:0006139	nucleobase, nucleoside, nucleotide and nucleic acid metabolic process
NP_067274.1	adenylate kinase 3 [Mus musculus]	603.12	0.92	0.34	1.19048	0.17	0.917431	0.61	1.38889	0	23956104	Q9WTP7	Biological Process	GO:0008652	amino acid biosynthetic process
NP_067274.1	adenylate kinase 3 [Mus musculus]	603.12	0.92	0.34	1.19048	0.17	0.917431	0.61	1.38889	0	23956104	Q9WTP7	Cellular Location	GO:0005739	mitochondrion
NP_057911.1	alanine-glyoxylate aminotransferase [Mus musculus]	338.33	1.09	0.68
NP_033786.1	aldehyde dehydrogenase 2, mitochondrial [Mus musculus]	2918.17	0.76	0	0.970874	0.59	0.833333	0.91	1.19048	0
NP_598803.1	aldehyde dehydrogenase family 6, subfamily A1 [Mus musculus]	1304.93	0.9	0.06	1.14943	0.14	0.943396	0.65	0.990099	0.53	19527258	Q3TDA2	Molecular Function	GO:0004491	methylmalonate-semialdehyde dehydrogenase (acylating) activity
NP_598803.1	aldehyde dehydrogenase family 6, subfamily A1 [Mus musculus]	1304.93	0.9	0.06	1.14943	0.14	0.943396	0.65	0.990099	0.53	19527258	Q3TDA2	Molecular Function	GO:0016491	oxidoreductase activity
NP_598803.1	aldehyde dehydrogenase family 6, subfamily A1 [Mus musculus]	1304.93	0.9	0.06	1.14943	0.14	0.943396	0.65	0.990099	0.53	19527258	Q3TDA2	Biological Process	GO:0006573	valine metabolic process
NP_598803.1	aldehyde dehydrogenase family 6, subfamily A1 [Mus musculus]	1304.93	0.9	0.06	1.14943	0.14	0.943396	0.65	0.990099	0.53	19527258	Q3TDA2	Biological Process	GO:0008152	metabolic process
NP_598803.1	aldehyde dehydrogenase family 6, subfamily A1 [Mus musculus]	1304.93	0.9	0.06	1.14943	0.14	0.943396	0.65	0.990099	0.53	19527258	Q3TDA2	Cellular Location	GO:0005739	mitochondrion
NP_613066.1	aldehyde dehydrogenase family 7, member A1 [Mus musculus]	1247.6	0.99	0.45	1.20482	0.19			1.16279	0.06	20070418	Q3TFC7	Molecular Function	GO:0016491	oxidoreductase activity
NP_613066.1	aldehyde dehydrogenase family 7, member A1 [Mus musculus]	1247.6	0.99	0.45	1.20482	0.19			1.16279	0.06	20070418	Q3TFC7	Biological Process	GO:0007605	sensory perception of sound
NP_613066.1	aldehyde dehydrogenase family 7, member A1 [Mus musculus]	1247.6	0.99	0.45	1.20482	0.19			1.16279	0.06	20070418	Q3TFC7	Biological Process	GO:0008152	metabolic process
NP_613066.1	aldehyde dehydrogenase family 7, member A1 [Mus musculus]	1247.6	0.99	0.45	1.20482	0.19			1.16279	0.06	20070418	Q3TFC7	Cellular Location	GO:0005739	mitochondrion
NP_067448.1	aldo-keto reductase family 1, member A4 (aldehyde reductase) [Mus musculus]	364.18							1.42857	0.06	10946870	Q9JII6	Molecular Function	GO:0004032	aldehyde reductase activity
NP_067448.1	aldo-keto reductase family 1, member A4 (aldehyde reductase) [Mus musculus]	364.18							1.42857	0.06	10946870	Q9JII6	Molecular Function	GO:0005515	protein binding
NP_067448.1	aldo-keto reductase family 1, member A4 (aldehyde reductase) [Mus musculus]	364.18							1.42857	0.06	10946870	Q9JII6	Molecular Function	GO:0008106	alcohol dehydrogenase (NADP+) activity
NP_067448.1	aldo-keto reductase family 1, member A4 (aldehyde reductase) [Mus musculus]	364.18							1.42857	0.06	10946870	Q9JII6	Molecular Function	GO:0016491	oxidoreductase activity
NP_067448.1	aldo-keto reductase family 1, member A4 (aldehyde reductase) [Mus musculus]	364.18							1.42857	0.06	10946870	Q9JII6	Molecular Function	GO:0047939	L-glucuronate reductase activity
NP_067448.1	aldo-keto reductase family 1, member A4 (aldehyde reductase) [Mus musculus]	364.18							1.42857	0.06	10946870	Q9JII6	Biological Process	GO:0008150	biological_process
NP_067448.1	aldo-keto reductase family 1, member A4 (aldehyde reductase) [Mus musculus]	364.18							1.42857	0.06	10946870	Q9JII6	Biological Process	GO:0019853	L-ascorbic acid biosynthetic process
NP_067448.1	aldo-keto reductase family 1, member A4 (aldehyde reductase) [Mus musculus]	364.18							1.42857	0.06	10946870	Q9JII6	Biological Process	GO:0042840	D-glucuronate catabolic process
NP_067448.1	aldo-keto reductase family 1, member A4 (aldehyde reductase) [Mus musculus]	364.18							1.42857	0.06	10946870	Q9JII6	Biological Process	GO:0046185	aldehyde catabolic process
NP_067448.1	aldo-keto reductase family 1, member A4 (aldehyde reductase) [Mus musculus]	364.18							1.42857	0.06	10946870	Q9JII6	Cellular Location	GO:0005829	cytosol
NP_067448.1	aldo-keto reductase family 1, member A4 (aldehyde reductase) [Mus musculus]	364.18							1.42857	0.06	10946870	Q9JII6	Cellular Location	GO:0016324	apical plasma membrane
NP_031464.1	aldolase 1, A isoform [Mus musculus]	750.94			1	0.49					6671539	P05064	Molecular Function	GO:0004332	fructose-bisphosphate aldolase activity
NP_031464.1	aldolase 1, A isoform [Mus musculus]	750.94			1	0.49					6671539	P05064	Molecular Function	GO:0016829	lyase activity
NP_031464.1	aldolase 1, A isoform [Mus musculus]	750.94			1	0.49					6671539	P05064	Biological Process	GO:0006096	glycolysis
NP_031464.1	aldolase 1, A isoform [Mus musculus]	750.94			1	0.49					6671539	P05064	Biological Process	GO:0008152	metabolic process
NP_033787.2	aldolase 3, C isoform [Mus musculus]	856.4			1.13636	0.27
NP_038958.2	aminoadipate-semialdehyde synthase precursor [Mus musculus]	830.05	1.73	1					1.1236	0.08	31980703	Q99K67	Molecular Function	GO:0004601	peroxidase activity
NP_038958.2	aminoadipate-semialdehyde synthase precursor [Mus musculus]	830.05	1.73	1					1.1236	0.08	31980703	Q99K67	Molecular Function	GO:0010010	lysine-ketoglutarate reductase activity
NP_038958.2	aminoadipate-semialdehyde synthase precursor [Mus musculus]	830.05	1.73	1					1.1236	0.08	31980703	Q99K67	Molecular Function	GO:0016491	oxidoreductase activity
NP_038958.2	aminoadipate-semialdehyde synthase precursor [Mus musculus]	830.05	1.73	1					1.1236	0.08	31980703	Q99K67	Molecular Function	GO:0047130	saccharopine dehydrogenase (NADP+, L-lysine-forming) activity
NP_038958.2	aminoadipate-semialdehyde synthase precursor [Mus musculus]	830.05	1.73	1					1.1236	0.08	31980703	Q99K67	Molecular Function	GO:0047131	saccharopine dehydrogenase (NAD+, L-glutamate-forming) activity
NP_038958.2	aminoadipate-semialdehyde synthase precursor [Mus musculus]	830.05	1.73	1					1.1236	0.08	31980703	Q99K67	Biological Process	GO:0006118	electron transport
NP_038958.2	aminoadipate-semialdehyde synthase precursor [Mus musculus]	830.05	1.73	1					1.1236	0.08	31980703	Q99K67	Biological Process	GO:0006979	response to oxidative stress
NP_038958.2	aminoadipate-semialdehyde synthase precursor [Mus musculus]	830.05	1.73	1					1.1236	0.08	31980703	Q99K67	Cellular Location	GO:0005739	mitochondrion
NP_080788.1	biphenyl hydrolase-like (serine hydrolase, breast epithelial mucin-associated antigen) [Mus musculus]	574.99	0.77	0.04	1.06383	0.41			0.943396	0.75	21624609	Q3TDN8	Molecular Function	GO:0016787	hydrolase activity
NP_080788.1	biphenyl hydrolase-like (serine hydrolase, breast epithelial mucin-associated antigen) [Mus musculus]	574.99	0.77	0.04	1.06383	0.41			0.943396	0.75	21624609	Q3TDN8	Biological Process	GO:0006725	aromatic compound metabolic process
NP_033867.1	branched chain aminotransferase 2, mitochondrial [Mus musculus]	445.79					0.862069	0.75	1.51515	0.03	33859514	O35855	Molecular Function	GO:0004084	branched-chain-amino-acid transaminase activity
NP_033867.1	branched chain aminotransferase 2, mitochondrial [Mus musculus]	445.79					0.862069	0.75	1.51515	0.03	33859514	O35855	Molecular Function	GO:0016740	transferase activity
NP_033867.1	branched chain aminotransferase 2, mitochondrial [Mus musculus]	445.79					0.862069	0.75	1.51515	0.03	33859514	O35855	Biological Process	GO:0008152	metabolic process
NP_033867.1	branched chain aminotransferase 2, mitochondrial [Mus musculus]	445.79					0.862069	0.75	1.51515	0.03	33859514	O35855	Biological Process	GO:0009082	branched chain family amino acid biosynthetic process
NP_033867.1	branched chain aminotransferase 2, mitochondrial [Mus musculus]	445.79					0.862069	0.75	1.51515	0.03	33859514	O35855	Biological Process	GO:0009083	branched chain family amino acid catabolic process
NP_033867.1	branched chain aminotransferase 2, mitochondrial [Mus musculus]	445.79					0.862069	0.75	1.51515	0.03	33859514	O35855	Cellular Location	GO:0005615	extracellular space
NP_033867.1	branched chain aminotransferase 2, mitochondrial [Mus musculus]	445.79					0.862069	0.75	1.51515	0.03	33859514	O35855	Cellular Location	GO:0005739	mitochondrion
NP_473435.1	butyryl Coenzyme A synthetase 1 [Mus musculus]	1191.51	0.7	0					1.2987	0	16905127	Q91VA0	Molecular Function	GO:0003996	acyl-CoA ligase activity
NP_473435.1	butyryl Coenzyme A synthetase 1 [Mus musculus]	1191.51	0.7	0					1.2987	0	16905127	Q91VA0	Molecular Function	GO:0015645	fatty-acid ligase activity
NP_473435.1	butyryl Coenzyme A synthetase 1 [Mus musculus]	1191.51	0.7	0					1.2987	0	16905127	Q91VA0	Molecular Function	GO:0016874	ligase activity
NP_473435.1	butyryl Coenzyme A synthetase 1 [Mus musculus]	1191.51	0.7	0					1.2987	0	16905127	Q91VA0	Molecular Function	GO:0047760	butyrate-CoA ligase activity
NP_473435.1	butyryl Coenzyme A synthetase 1 [Mus musculus]	1191.51	0.7	0					1.2987	0	16905127	Q91VA0	Biological Process	GO:0006633	fatty acid biosynthetic process
NP_473435.1	butyryl Coenzyme A synthetase 1 [Mus musculus]	1191.51	0.7	0					1.2987	0	16905127	Q91VA0	Biological Process	GO:0008152	metabolic process
NP_473435.1	butyryl Coenzyme A synthetase 1 [Mus musculus]	1191.51	0.7	0					1.2987	0	16905127	Q91VA0	Biological Process	GO:0015980	energy derivation by oxidation of organic compounds
NP_473435.1	butyryl Coenzyme A synthetase 1 [Mus musculus]	1191.51	0.7	0					1.2987	0	16905127	Q91VA0	Biological Process	GO:0018874	benzoate metabolic process
NP_473435.1	butyryl Coenzyme A synthetase 1 [Mus musculus]	1191.51	0.7	0					1.2987	0	16905127	Q91VA0	Biological Process	GO:0019395	fatty acid oxidation
NP_473435.1	butyryl Coenzyme A synthetase 1 [Mus musculus]	1191.51	0.7	0					1.2987	0	16905127	Q91VA0	Biological Process	GO:0019605	butyrate metabolic process
NP_473435.1	butyryl Coenzyme A synthetase 1 [Mus musculus]	1191.51	0.7	0					1.2987	0	16905127	Q91VA0	Cellular Location	GO:0005739	mitochondrion
NP_473435.1	butyryl Coenzyme A synthetase 1 [Mus musculus]	1191.51	0.7	0					1.2987	0	16905127	Q91VA0	Cellular Location	GO:0005759	mitochondrial matrix
NP_076222.1	carnitine O-octanoyltransferase [Mus musculus]	312.62	0.7	0.1					0.675676	1	17157983	Q9DC50	Molecular Function	GO:0008415	acyltransferase activity
NP_076222.1	carnitine O-octanoyltransferase [Mus musculus]	312.62	0.7	0.1					0.675676	1	17157983	Q9DC50	Molecular Function	GO:0008458	carnitine O-octanoyltransferase activity
NP_076222.1	carnitine O-octanoyltransferase [Mus musculus]	312.62	0.7	0.1					0.675676	1	17157983	Q9DC50	Molecular Function	GO:0016740	transferase activity
NP_076222.1	carnitine O-octanoyltransferase [Mus musculus]	312.62	0.7	0.1					0.675676	1	17157983	Q9DC50	Biological Process	GO:0006629	lipid metabolic process
NP_076222.1	carnitine O-octanoyltransferase [Mus musculus]	312.62	0.7	0.1					0.675676	1	17157983	Q9DC50	Biological Process	GO:0006631	fatty acid metabolic process
NP_076222.1	carnitine O-octanoyltransferase [Mus musculus]	312.62	0.7	0.1					0.675676	1	17157983	Q9DC50	Biological Process	GO:0006810	transport
NP_076222.1	carnitine O-octanoyltransferase [Mus musculus]	312.62	0.7	0.1					0.675676	1	17157983	Q9DC50	Biological Process	GO:0015908	fatty acid transport
NP_076222.1	carnitine O-octanoyltransferase [Mus musculus]	312.62	0.7	0.1					0.675676	1	17157983	Q9DC50	Cellular Location	GO:0005777	peroxisome
NP_033934.1	catalase [Mus musculus]	2350.02	0.73	0					0.632911	1
NP_031824.1	cathepsin B preproprotein [Mus musculus]	202.52			Diabetic only						6681079	P10605	Molecular Function	GO:0004213	cathepsin B activity
NP_031824.1	cathepsin B preproprotein [Mus musculus]	202.52			Diabetic only						6681079	P10605	Molecular Function	GO:0004601	peroxidase activity
NP_031824.1	cathepsin B preproprotein [Mus musculus]	202.52			Diabetic only						6681079	P10605	Molecular Function	GO:0005515	protein binding
NP_031824.1	cathepsin B preproprotein [Mus musculus]	202.52			Diabetic only						6681079	P10605	Biological Process	GO:0006508	proteolysis
NP_031824.1	cathepsin B preproprotein [Mus musculus]	202.52			Diabetic only						6681079	P10605	Biological Process	GO:0006979	response to oxidative stress
NP_031824.1	cathepsin B preproprotein [Mus musculus]	202.52			Diabetic only						6681079	P10605	Biological Process	GO:0050790	regulation of catalytic activity
NP_031824.1	cathepsin B preproprotein [Mus musculus]	202.52			Diabetic only						6681079	P10605	Cellular Location	GO:0005739	mitochondrion
NP_031824.1	cathepsin B preproprotein [Mus musculus]	202.52			Diabetic only						6681079	P10605	Cellular Location	GO:0005764	lysosome
NP_080720.1	citrate synthase [Mus musculus]	249.7	0.93	0.39	0.970874	0.74	0.862069	1	1.25	0.03	13385942	Q9CZU6	Molecular Function	GO:0004108	citrate (Si)-synthase activity
NP_080720.1	citrate synthase [Mus musculus]	249.7	0.93	0.39	0.970874	0.74	0.862069	1	1.25	0.03	13385942	Q9CZU6	Molecular Function	GO:0016740	transferase activity
NP_080720.1	citrate synthase [Mus musculus]	249.7	0.93	0.39	0.970874	0.74	0.862069	1	1.25	0.03	13385942	Q9CZU6	Biological Process	GO:0006099	tricarboxylic acid cycle
NP_080720.1	citrate synthase [Mus musculus]	249.7	0.93	0.39	0.970874	0.74	0.862069	1	1.25	0.03	13385942	Q9CZU6	Cellular Location	GO:0005737	cytoplasm
NP_080720.1	citrate synthase [Mus musculus]	249.7	0.93	0.39	0.970874	0.74	0.862069	1	1.25	0.03	13385942	Q9CZU6	Cellular Location	GO:0005739	mitochondrion
NP_082221.1	citrate synthase-like protein [Mus musculus]	247.26	0.69	0.15	1.06383	0.23	0.900901	0.88	1.36986	0.02	13386272	Q80X68	Molecular Function	GO:0004108	citrate (Si)-synthase activity
NP_082221.1	citrate synthase-like protein [Mus musculus]	247.26	0.69	0.15	1.06383	0.23	0.900901	0.88	1.36986	0.02	13386272	Q80X68	Biological Process	GO:0006099	tricarboxylic acid cycle
NP_082221.1	citrate synthase-like protein [Mus musculus]	247.26	0.69	0.15	1.06383	0.23	0.900901	0.88	1.36986	0.02	13386272	Q80X68	Cellular Location	GO:0005615	extracellular space
NP_082221.1	citrate synthase-like protein [Mus musculus]	247.26	0.69	0.15	1.06383	0.23	0.900901	0.88	1.36986	0.02	13386272	Q80X68	Cellular Location	GO:0005737	cytoplasm
NP_082221.1	citrate synthase-like protein [Mus musculus]	247.26	0.69	0.15	1.06383	0.23	0.900901	0.88	1.36986	0.02	13386272	Q80X68	Cellular Location	GO:0005739	mitochondrion
NP_001003908.1	clathrin, heavy polypeptide (Hc) [Mus musculus]	1516.69			1.07527	0.33					51491845	Q68FD5	Molecular Function	GO:0005488	binding
NP_001003908.1	clathrin, heavy polypeptide (Hc) [Mus musculus]	1516.69			1.07527	0.33					51491845	Q68FD5	Cellular Location	GO:0005739	mitochondrion
NP_001003908.1	clathrin, heavy polypeptide (Hc) [Mus musculus]	1516.69			1.07527	0.33					51491845	Q68FD5	Cellular Location	GO:0005905	coated pit
NP_001003908.1	clathrin, heavy polypeptide (Hc) [Mus musculus]	1516.69			1.07527	0.33					51491845	Q68FD5	Cellular Location	GO:0030117	membrane coat
NP_001003908.1	clathrin, heavy polypeptide (Hc) [Mus musculus]	1516.69			1.07527	0.33					51491845	Q68FD5	Cellular Location	GO:0030125	clathrin vesicle coat
NP_031791.3	collapsin response mediator protein 1 [Mus musculus]	349.72			1.26582	0.23
NP_067248.1	creatine kinase, brain [Mus musculus]	924.7			1.19048	0.1					10946574	Q04447	Molecular Function	GO:0000166	nucleotide binding
NP_067248.1	creatine kinase, brain [Mus musculus]	924.7			1.19048	0.1					10946574	Q04447	Molecular Function	GO:0004111	creatine kinase activity
NP_067248.1	creatine kinase, brain [Mus musculus]	924.7			1.19048	0.1					10946574	Q04447	Molecular Function	GO:0005524	ATP binding
NP_067248.1	creatine kinase, brain [Mus musculus]	924.7			1.19048	0.1					10946574	Q04447	Cellular Location	GO:0005739	mitochondrion
NP_031887.2	dihydrolipoamide dehydrogenase [Mus musculus]	351.25	0.86	0.24	0.990099	0.57	0.840336	0.95	1.20482	0.02	31982856	Q3TIE8	Molecular Function	GO:0004148	dihydrolipoyl dehydrogenase activity
NP_031887.2	dihydrolipoamide dehydrogenase [Mus musculus]	351.25	0.86	0.24	0.990099	0.57	0.840336	0.95	1.20482	0.02	31982856	Q3TIE8	Molecular Function	GO:0016491	oxidoreductase activity
NP_031887.2	dihydrolipoamide dehydrogenase [Mus musculus]	351.25	0.86	0.24	0.990099	0.57	0.840336	0.95	1.20482	0.02	31982856	Q3TIE8	Molecular Function	GO:0050660	FAD binding
NP_031887.2	dihydrolipoamide dehydrogenase [Mus musculus]	351.25	0.86	0.24	0.990099	0.57	0.840336	0.95	1.20482	0.02	31982856	Q3TIE8	Biological Process	GO:0006118	electron transport
NP_031887.2	dihydrolipoamide dehydrogenase [Mus musculus]	351.25	0.86	0.24	0.990099	0.57	0.840336	0.95	1.20482	0.02	31982856	Q3TIE8	Biological Process	GO:0045454	cell redox homeostasis
NP_031887.2	dihydrolipoamide dehydrogenase [Mus musculus]	351.25	0.86	0.24	0.990099	0.57	0.840336	0.95	1.20482	0.02	31982856	Q3TIE8	Cellular Location	GO:0005737	cytoplasm
NP_031887.2	dihydrolipoamide dehydrogenase [Mus musculus]	351.25	0.86	0.24	0.990099	0.57	0.840336	0.95	1.20482	0.02	31982856	Q3TIE8	Cellular Location	GO:0005739	mitochondrion
NP_663589.2	dihydrolipoamide S-acetyltransferase (E2 component of pyruvate dehydrogenase complex) [Mus musculus]	1728.82			0.934579	0.76	0.990099	0.5	1.08696	0.41	31542559	Q8BMF4	Molecular Function	GO:0004742	dihydrolipoyllysine-residue acetyltransferase activity
NP_663589.2	dihydrolipoamide S-acetyltransferase (E2 component of pyruvate dehydrogenase complex) [Mus musculus]	1728.82			0.934579	0.76	0.990099	0.5	1.08696	0.41	31542559	Q8BMF4	Molecular Function	GO:0005515	protein binding
NP_663589.2	dihydrolipoamide S-acetyltransferase (E2 component of pyruvate dehydrogenase complex) [Mus musculus]	1728.82			0.934579	0.76	0.990099	0.5	1.08696	0.41	31542559	Q8BMF4	Molecular Function	GO:0008415	acyltransferase activity
NP_663589.2	dihydrolipoamide S-acetyltransferase (E2 component of pyruvate dehydrogenase complex) [Mus musculus]	1728.82			0.934579	0.76	0.990099	0.5	1.08696	0.41	31542559	Q8BMF4	Molecular Function	GO:0016740	transferase activity
NP_663589.2	dihydrolipoamide S-acetyltransferase (E2 component of pyruvate dehydrogenase complex) [Mus musculus]	1728.82			0.934579	0.76	0.990099	0.5	1.08696	0.41	31542559	Q8BMF4	Molecular Function	GO:0031405	lipoic acid binding
NP_663589.2	dihydrolipoamide S-acetyltransferase (E2 component of pyruvate dehydrogenase complex) [Mus musculus]	1728.82			0.934579	0.76	0.990099	0.5	1.08696	0.41	31542559	Q8BMF4	Biological Process	GO:0006086	acetyl-CoA biosynthetic process from pyruvate
NP_663589.2	dihydrolipoamide S-acetyltransferase (E2 component of pyruvate dehydrogenase complex) [Mus musculus]	1728.82			0.934579	0.76	0.990099	0.5	1.08696	0.41	31542559	Q8BMF4	Biological Process	GO:0006096	glycolysis
NP_663589.2	dihydrolipoamide S-acetyltransferase (E2 component of pyruvate dehydrogenase complex) [Mus musculus]	1728.82			0.934579	0.76	0.990099	0.5	1.08696	0.41	31542559	Q8BMF4	Biological Process	GO:0008152	metabolic process
NP_663589.2	dihydrolipoamide S-acetyltransferase (E2 component of pyruvate dehydrogenase complex) [Mus musculus]	1728.82			0.934579	0.76	0.990099	0.5	1.08696	0.41	31542559	Q8BMF4	Cellular Location	GO:0005739	mitochondrion
NP_663589.2	dihydrolipoamide S-acetyltransferase (E2 component of pyruvate dehydrogenase complex) [Mus musculus]	1728.82			0.934579	0.76	0.990099	0.5	1.08696	0.41	31542559	Q8BMF4	Cellular Location	GO:0005967	mitochondrial pyruvate dehydrogenase complex
NP_034085.2	dihydropyrimidinase-like 2 [Mus musculus]	826.36			1.19048	0.16
NP_083048.1	dimethylglycine dehydrogenase precursor [Mus musculus]	1862.13	0.91	0.09					1.13636	0.23	21311901	Q9DBT9	Molecular Function	GO:0004047	aminomethyltransferase activity
NP_083048.1	dimethylglycine dehydrogenase precursor [Mus musculus]	1862.13	0.91	0.09					1.13636	0.23	21311901	Q9DBT9	Molecular Function	GO:0016491	oxidoreductase activity
NP_083048.1	dimethylglycine dehydrogenase precursor [Mus musculus]	1862.13	0.91	0.09					1.13636	0.23	21311901	Q9DBT9	Molecular Function	GO:0047865	dimethylglycine dehydrogenase activity
NP_083048.1	dimethylglycine dehydrogenase precursor [Mus musculus]	1862.13	0.91	0.09					1.13636	0.23	21311901	Q9DBT9	Biological Process	GO:0006118	electron transport
NP_083048.1	dimethylglycine dehydrogenase precursor [Mus musculus]	1862.13	0.91	0.09					1.13636	0.23	21311901	Q9DBT9	Biological Process	GO:0006546	glycine catabolic process
NP_083048.1	dimethylglycine dehydrogenase precursor [Mus musculus]	1862.13	0.91	0.09					1.13636	0.23	21311901	Q9DBT9	Biological Process	GO:0006605	protein targeting
NP_083048.1	dimethylglycine dehydrogenase precursor [Mus musculus]	1862.13	0.91	0.09					1.13636	0.23	21311901	Q9DBT9	Cellular Location	GO:0005737	cytoplasm
NP_083048.1	dimethylglycine dehydrogenase precursor [Mus musculus]	1862.13	0.91	0.09					1.13636	0.23	21311901	Q9DBT9	Cellular Location	GO:0005739	mitochondrion
NP_081846.3	D-lactate dehydrogenase [Mus musculus]	441.79	0.79	0.09					0.657895	1
NP_034153.2	dodecenoyl-Coenzyme A delta isomerase (3,2 trans-enoyl-Coenyme A isomerase) [Mus musculus]	668.37	0.83	0.05	1.13636	0.27	1.11111	0.18	1.31579	0.04	31981810	Q8QZV3	Molecular Function	GO:0004165	dodecenoyl-CoA delta-isomerase activity
NP_034153.2	dodecenoyl-Coenzyme A delta isomerase (3,2 trans-enoyl-Coenyme A isomerase) [Mus musculus]	668.37	0.83	0.05	1.13636	0.27	1.11111	0.18	1.31579	0.04	31981810	Q8QZV3	Molecular Function	GO:0016853	isomerase activity
NP_034153.2	dodecenoyl-Coenzyme A delta isomerase (3,2 trans-enoyl-Coenyme A isomerase) [Mus musculus]	668.37	0.83	0.05	1.13636	0.27	1.11111	0.18	1.31579	0.04	31981810	Q8QZV3	Biological Process	GO:0006635	fatty acid beta-oxidation
NP_034153.2	dodecenoyl-Coenzyme A delta isomerase (3,2 trans-enoyl-Coenyme A isomerase) [Mus musculus]	668.37	0.83	0.05	1.13636	0.27	1.11111	0.18	1.31579	0.04	31981810	Q8QZV3	Biological Process	GO:0008152	metabolic process
NP_034153.2	dodecenoyl-Coenzyme A delta isomerase (3,2 trans-enoyl-Coenyme A isomerase) [Mus musculus]	668.37	0.83	0.05	1.13636	0.27	1.11111	0.18	1.31579	0.04	31981810	Q8QZV3	Cellular Location	GO:0005739	mitochondrion
NP_034153.2	dodecenoyl-Coenzyme A delta isomerase (3,2 trans-enoyl-Coenyme A isomerase) [Mus musculus]	668.37	0.83	0.05	1.13636	0.27	1.11111	0.18	1.31579	0.04	31981810	Q8QZV3	Cellular Location	GO:0005743	mitochondrial inner membrane
NP_663590.2	electron transferring flavoprotein, alpha polypeptide [Mus musculus]	1616.33	0.85	0.02	1.14943	0.12	1	0.46	1.06383	0.18	31981826	Q3THD7	Molecular Function	GO:0009055	electron carrier activity
NP_663590.2	electron transferring flavoprotein, alpha polypeptide [Mus musculus]	1616.33	0.85	0.02	1.14943	0.12	1	0.46	1.06383	0.18	31981826	Q3THD7	Molecular Function	GO:0050660	FAD binding
NP_663590.2	electron transferring flavoprotein, alpha polypeptide [Mus musculus]	1616.33	0.85	0.02	1.14943	0.12	1	0.46	1.06383	0.18	31981826	Q3THD7	Biological Process	GO:0006118	electron transport
NP_663590.2	electron transferring flavoprotein, alpha polypeptide [Mus musculus]	1616.33	0.85	0.02	1.14943	0.12	1	0.46	1.06383	0.18	31981826	Q3THD7	Cellular Location	GO:0005739	mitochondrion
NP_663590.2	electron transferring flavoprotein, alpha polypeptide [Mus musculus]	1616.33	0.85	0.02	1.14943	0.12	1	0.46	1.06383	0.18	31981826	Q3THD7	Cellular Location	GO:0017133	mitochondrial electron transfer flavoprotein complex
NP_080971.2	electron transferring flavoprotein, beta polypeptide [Mus musculus]	996.2	0.84	0.01	1.07527	0.35	1.05263	0.14	1.03093	0.31	38142460	Q9DCW4	Molecular Function	GO:0009055	electron carrier activity
NP_080971.2	electron transferring flavoprotein, beta polypeptide [Mus musculus]	996.2	0.84	0.01	1.07527	0.35	1.05263	0.14	1.03093	0.31	38142460	Q9DCW4	Biological Process	GO:0006118	electron transport
NP_080971.2	electron transferring flavoprotein, beta polypeptide [Mus musculus]	996.2	0.84	0.01	1.07527	0.35	1.05263	0.14	1.03093	0.31	38142460	Q9DCW4	Biological Process	GO:0006605	protein targeting
NP_080971.2	electron transferring flavoprotein, beta polypeptide [Mus musculus]	996.2	0.84	0.01	1.07527	0.35	1.05263	0.14	1.03093	0.31	38142460	Q9DCW4	Biological Process	GO:0006810	transport
NP_080971.2	electron transferring flavoprotein, beta polypeptide [Mus musculus]	996.2	0.84	0.01	1.07527	0.35	1.05263	0.14	1.03093	0.31	38142460	Q9DCW4	Cellular Location	GO:0005739	mitochondrion
NP_080971.2	electron transferring flavoprotein, beta polypeptide [Mus musculus]	996.2	0.84	0.01	1.07527	0.35	1.05263	0.14	1.03093	0.31	38142460	Q9DCW4	Cellular Location	GO:0017133	mitochondrial electron transfer flavoprotein complex
NP_075608.1	enolase 1, alpha non-neuron [Mus musculus]	678.36			1.11111	0.28					12963491	Q5XJG8	Molecular Function	GO:0000287	magnesium ion binding
NP_075608.1	enolase 1, alpha non-neuron [Mus musculus]	678.36			1.11111	0.28					12963491	Q5XJG8	Molecular Function	GO:0004634	phosphopyruvate hydratase activity
NP_075608.1	enolase 1, alpha non-neuron [Mus musculus]	678.36			1.11111	0.28					12963491	Q5XJG8	Molecular Function	GO:0016829	lyase activity
NP_075608.1	enolase 1, alpha non-neuron [Mus musculus]	678.36			1.11111	0.28					12963491	Q5XJG8	Biological Process	GO:0006096	glycolysis
NP_075608.1	enolase 1, alpha non-neuron [Mus musculus]	678.36			1.11111	0.28					12963491	Q5XJG8	Cellular Location	GO:0000015	phosphopyruvate hydratase complex
NP_038537.1	enolase 2, gamma neuronal [Mus musculus]	583.76			1.14943	0.29
NP_031959.1	enolase 3, beta muscle [Mus musculus]	292.62			0.555556	0.93					6679651	P21550	Molecular Function	GO:0000287	magnesium ion binding
NP_031959.1	enolase 3, beta muscle [Mus musculus]	292.62			0.555556	0.93					6679651	P21550	Molecular Function	GO:0004634	phosphopyruvate hydratase activity
NP_031959.1	enolase 3, beta muscle [Mus musculus]	292.62			0.555556	0.93					6679651	P21550	Molecular Function	GO:0016829	lyase activity
NP_031959.1	enolase 3, beta muscle [Mus musculus]	292.62			0.555556	0.93					6679651	P21550	Biological Process	GO:0006096	glycolysis
NP_031959.1	enolase 3, beta muscle [Mus musculus]	292.62			0.555556	0.93					6679651	P21550	Cellular Location	GO:0000015	phosphopyruvate hydratase complex
NP_058052.1	enoyl coenzyme A hydratase 1, peroxisomal [Mus musculus]	1560.08					1.5625	0
NP_444349.1	enoyl Coenzyme A hydratase, short chain, 1, mitochondrial [Mus musculus]	328.85	1.05	0.56	1	0.5	0.943396	0.69	1.0101	0.46
NP_031966.2	epoxide hydrolase 2, cytoplasmic [Mus musculus]	1287.83	0.83	0.07					0.735294	0.99	31982393	P34914	Molecular Function	GO:0000287	magnesium ion binding
NP_031966.2	epoxide hydrolase 2, cytoplasmic [Mus musculus]	1287.83	0.83	0.07					0.735294	0.99	31982393	P34914	Molecular Function	GO:0004301	epoxide hydrolase activity
NP_031966.2	epoxide hydrolase 2, cytoplasmic [Mus musculus]	1287.83	0.83	0.07					0.735294	0.99	31982393	P34914	Molecular Function	GO:0016787	hydrolase activity
NP_031966.2	epoxide hydrolase 2, cytoplasmic [Mus musculus]	1287.83	0.83	0.07					0.735294	0.99	31982393	P34914	Biological Process	GO:0006805	xenobiotic metabolic process
NP_031966.2	epoxide hydrolase 2, cytoplasmic [Mus musculus]	1287.83	0.83	0.07					0.735294	0.99	31982393	P34914	Biological Process	GO:0008152	metabolic process
NP_031966.2	epoxide hydrolase 2, cytoplasmic [Mus musculus]	1287.83	0.83	0.07					0.735294	0.99	31982393	P34914	Biological Process	GO:0009636	response to toxin
NP_031966.2	epoxide hydrolase 2, cytoplasmic [Mus musculus]	1287.83	0.83	0.07					0.735294	0.99	31982393	P34914	Biological Process	GO:0019439	aromatic compound catabolic process
NP_031966.2	epoxide hydrolase 2, cytoplasmic [Mus musculus]	1287.83	0.83	0.07					0.735294	0.99	31982393	P34914	Cellular Location	GO:0005615	extracellular space
NP_031966.2	epoxide hydrolase 2, cytoplasmic [Mus musculus]	1287.83	0.83	0.07					0.735294	0.99	31982393	P34914	Cellular Location	GO:0005777	peroxisome
NP_034339.1	fumarate hydratase 1 [Mus musculus]	349.87	1.02	0.6	1.04167	0.39	0.900901	0.89	1.07527	0.29
NP_032159.1	glutamate dehydrogenase 1 [Mus musculus]	2380.13	0.7	0	1.26582	0	0.757576	0.75	1.63934	0
NP_034455.1	glutamate oxaloacetate transaminase 2, mitochondrial [Mus musculus]	1240.3	0.76	0	0.689655	1	1.25	0	1.53846	0
NP_776291.1	glutamic pyruvate transaminase (alanine aminotransferase) 2 [Mus musculus]	362.63	1.3	0.84
NP_032157.2	glutamine synthetase [Mus musculus]	650			1.1236	0.3					31982332	Q3TRK7	Molecular Function	GO:0004356	glutamate-ammonia ligase activity
NP_032157.2	glutamine synthetase [Mus musculus]	650			1.1236	0.3					31982332	Q3TRK7	Molecular Function	GO:0016874	ligase activity
NP_032157.2	glutamine synthetase [Mus musculus]	650			1.1236	0.3					31982332	Q3TRK7	Biological Process	GO:0006542	glutamine biosynthetic process
NP_032157.2	glutamine synthetase [Mus musculus]	650			1.1236	0.3					31982332	Q3TRK7	Biological Process	GO:0006807	nitrogen compound metabolic process
NP_032157.2	glutamine synthetase [Mus musculus]	650			1.1236	0.3					31982332	Q3TRK7	Cellular Location	GO:0005739	mitochondrion
NP_032123.1	glutaryl-Coenzyme A dehydrogenase [Mus musculus]	667.38	0.95	0.38					1	0.48
NP_032186.2	glutathione peroxidase 1 [Mus musculus]	426.04	1.03	0.57					1.28205	0.01	84871986	P11352	Molecular Function	GO:0004602	glutathione peroxidase activity
NP_032186.2	glutathione peroxidase 1 [Mus musculus]	426.04	1.03	0.57					1.28205	0.01	84871986	P11352	Molecular Function	GO:0008430	selenium binding
NP_032186.2	glutathione peroxidase 1 [Mus musculus]	426.04	1.03	0.57					1.28205	0.01	84871986	P11352	Biological Process	GO:0000302	response to reactive oxygen species
NP_032186.2	glutathione peroxidase 1 [Mus musculus]	426.04	1.03	0.57					1.28205	0.01	84871986	P11352	Biological Process	GO:0008631	induction of apoptosis by oxidative stress
NP_032186.2	glutathione peroxidase 1 [Mus musculus]	426.04	1.03	0.57					1.28205	0.01	84871986	P11352	Cellular Location	GO:0005575	cellular_component
NP_032186.2	glutathione peroxidase 1 [Mus musculus]	426.04	1.03	0.57					1.28205	0.01	84871986	P11352	Cellular Location	GO:0005739	mitochondrion
NP_034488.1	glutathione S-transferase, mu 1 [Mus musculus]	190.21			1.06383	0.45
NP_032209.1	glutathione S-transferase, mu 2 [Mus musculus]	174.63			1.16279	0.4					6680121	P15626	Molecular Function	GO:0004364	glutathione transferase activity
NP_032209.1	glutathione S-transferase, mu 2 [Mus musculus]	174.63			1.16279	0.4					6680121	P15626	Molecular Function	GO:0016740	transferase activity
NP_032209.1	glutathione S-transferase, mu 2 [Mus musculus]	174.63			1.16279	0.4					6680121	P15626	Biological Process	GO:0008152	metabolic process
NP_081040.1	glutathione S-transferase, mu 4 [Mus musculus]	149.87			1.42857	0.32					28076911	Q8R5I6	Molecular Function	GO:0004364	glutathione transferase activity
NP_081040.1	glutathione S-transferase, mu 4 [Mus musculus]	149.87			1.42857	0.32					28076911	Q8R5I6	Molecular Function	GO:0016740	transferase activity
NP_081040.1	glutathione S-transferase, mu 4 [Mus musculus]	149.87			1.42857	0.32					28076911	Q8R5I6	Biological Process	GO:0008152	metabolic process
NP_081040.1	glutathione S-transferase, mu 4 [Mus musculus]	149.87			1.42857	0.32					28076911	Q8R5I6	Biological Process	GO:0018916	nitrobenzene metabolic process
NP_081040.1	glutathione S-transferase, mu 4 [Mus musculus]	149.87			1.42857	0.32					28076911	Q8R5I6	Biological Process	GO:0042178	xenobiotic catabolic process
NP_081040.1	glutathione S-transferase, mu 4 [Mus musculus]	149.87			1.42857	0.32					28076911	Q8R5I6	Cellular Location	GO:0005829	cytosol
NP_666047.1	glycine-N-acyltransferase [Mus musculus]	623.21	0.89	0.19					1.1236	0.06	22122359	Q91XE0	Molecular Function	GO:0004872	receptor activity
NP_666047.1	glycine-N-acyltransferase [Mus musculus]	623.21	0.89	0.19					1.1236	0.06	22122359	Q91XE0	Molecular Function	GO:0005215	transporter activity
NP_666047.1	glycine-N-acyltransferase [Mus musculus]	623.21	0.89	0.19					1.1236	0.06	22122359	Q91XE0	Molecular Function	GO:0008415	acyltransferase activity
NP_666047.1	glycine-N-acyltransferase [Mus musculus]	623.21	0.89	0.19					1.1236	0.06	22122359	Q91XE0	Molecular Function	GO:0016740	transferase activity
NP_666047.1	glycine-N-acyltransferase [Mus musculus]	623.21	0.89	0.19					1.1236	0.06	22122359	Q91XE0	Molecular Function	GO:0047961	glycine N-acyltransferase activity
NP_666047.1	glycine-N-acyltransferase [Mus musculus]	623.21	0.89	0.19					1.1236	0.06	22122359	Q91XE0	Biological Process	GO:0006810	transport
NP_666047.1	glycine-N-acyltransferase [Mus musculus]	623.21	0.89	0.19					1.1236	0.06	22122359	Q91XE0	Cellular Location	GO:0005739	mitochondrion
NP_666047.1	glycine-N-acyltransferase [Mus musculus]	623.21	0.89	0.19					1.1236	0.06	22122359	Q91XE0	Cellular Location	GO:0016020	membrane
NP_525028.1	glyoxylate reductase/hydroxypyruvate reductase [Mus musculus]	237.39							1.31579	0.29	17933768	Q91Z53	Molecular Function	GO:0016491	oxidoreductase activity
NP_525028.1	glyoxylate reductase/hydroxypyruvate reductase [Mus musculus]	237.39							1.31579	0.29	17933768	Q91Z53	Molecular Function	GO:0030267	glyoxylate reductase (NADP) activity
NP_525028.1	glyoxylate reductase/hydroxypyruvate reductase [Mus musculus]	237.39							1.31579	0.29	17933768	Q91Z53	Molecular Function	GO:0048037	cofactor binding
NP_525028.1	glyoxylate reductase/hydroxypyruvate reductase [Mus musculus]	237.39							1.31579	0.29	17933768	Q91Z53	Molecular Function	GO:0051287	NAD binding
NP_525028.1	glyoxylate reductase/hydroxypyruvate reductase [Mus musculus]	237.39							1.31579	0.29	17933768	Q91Z53	Biological Process	GO:0008152	metabolic process
NP_032329.1	heat shock protein 1 (chaperonin 10) [Mus musculus]	542.11	0.82	0.03	0.833333	1	0.980392	0.55	0.970874	0.68
NP_001002012.1	heat shock protein 2 [Mus musculus]	612.6			1.02041	0.48
NP_032327.2	heat shock protein 2 [Mus musculus]	612.6			1.0989	0.34					31560686	Q99KD7	Molecular Function	GO:0000166	nucleotide binding
NP_032327.2	heat shock protein 2 [Mus musculus]	612.6			1.0989	0.34					31560686	Q99KD7	Molecular Function	GO:0005515	protein binding
NP_032327.2	heat shock protein 2 [Mus musculus]	612.6			1.0989	0.34					31560686	Q99KD7	Molecular Function	GO:0005524	ATP binding
NP_032327.2	heat shock protein 2 [Mus musculus]	612.6			1.0989	0.34					31560686	Q99KD7	Biological Process	GO:0006457	protein folding
NP_032327.2	heat shock protein 2 [Mus musculus]	612.6			1.0989	0.34					31560686	Q99KD7	Biological Process	GO:0006986	response to unfolded protein
NP_032327.2	heat shock protein 2 [Mus musculus]	612.6			1.0989	0.34					31560686	Q99KD7	Cellular Location	GO:0005739	mitochondrion
NP_112442.2	heat shock protein 8 [Mus musculus]	814.65			1.07527	0.35					31981690	P63017	Molecular Function	GO:0000166	nucleotide binding
NP_112442.2	heat shock protein 8 [Mus musculus]	814.65			1.07527	0.35					31981690	P63017	Molecular Function	GO:0005524	ATP binding
NP_112442.2	heat shock protein 8 [Mus musculus]	814.65			1.07527	0.35					31981690	P63017	Molecular Function	GO:0042623	ATPase activity, coupled
NP_112442.2	heat shock protein 8 [Mus musculus]	814.65			1.07527	0.35					31981690	P63017	Molecular Function	GO:0051082	unfolded protein binding
NP_112442.2	heat shock protein 8 [Mus musculus]	814.65			1.07527	0.35					31981690	P63017	Biological Process	GO:0000074	regulation of progression through cell cycle
NP_112442.2	heat shock protein 8 [Mus musculus]	814.65			1.07527	0.35					31981690	P63017	Biological Process	GO:0006457	protein folding
NP_112442.2	heat shock protein 8 [Mus musculus]	814.65			1.07527	0.35					31981690	P63017	Biological Process	GO:0006986	response to unfolded protein
NP_112442.2	heat shock protein 8 [Mus musculus]	814.65			1.07527	0.35					31981690	P63017	Biological Process	GO:0051085	chaperone cofactor-dependent protein folding
NP_112442.2	heat shock protein 8 [Mus musculus]	814.65			1.07527	0.35					31981690	P63017	Cellular Location	GO:0005634	nucleus
NP_034611.1	heat shock protein 9A [Mus musculus]	1009.97	0.94	0.25	0.980392	0.59	0.943396	0.67	1.14943	0.03
NP_034568.1	hexokinase 1 [Mus musculus]	1350			0.869565	0.84
NP_062418.2	hydroxyacid oxidase (glycolate oxidase) 3 [Mus musculus]	361.46							1.26582	0.13	31980953	Q9NYQ2	Molecular Function	GO:0003973	(S)-2-hydroxy-acid oxidase activity
NP_062418.2	hydroxyacid oxidase (glycolate oxidase) 3 [Mus musculus]	361.46							1.26582	0.13	31980953	Q9NYQ2	Molecular Function	GO:0010181	FMN binding
NP_062418.2	hydroxyacid oxidase (glycolate oxidase) 3 [Mus musculus]	361.46							1.26582	0.13	31980953	Q9NYQ2	Molecular Function	GO:0016491	oxidoreductase activity
NP_062418.2	hydroxyacid oxidase (glycolate oxidase) 3 [Mus musculus]	361.46							1.26582	0.13	31980953	Q9NYQ2	Biological Process	GO:0006118	electron transport
NP_062418.2	hydroxyacid oxidase (glycolate oxidase) 3 [Mus musculus]	361.46							1.26582	0.13	31980953	Q9NYQ2	Biological Process	GO:0006605	protein targeting
NP_062418.2	hydroxyacid oxidase (glycolate oxidase) 3 [Mus musculus]	361.46							1.26582	0.13	31980953	Q9NYQ2	Biological Process	GO:0006631	fatty acid metabolic process
NP_062418.2	hydroxyacid oxidase (glycolate oxidase) 3 [Mus musculus]	361.46							1.26582	0.13	31980953	Q9NYQ2	Biological Process	GO:0008152	metabolic process
NP_062418.2	hydroxyacid oxidase (glycolate oxidase) 3 [Mus musculus]	361.46							1.26582	0.13	31980953	Q9NYQ2	Cellular Location	GO:0005777	peroxisome
NP_058043.3	hydroxyacyl-Coenzyme A dehydrogenase type II [Mus musculus]	532.68	0.88	0.21	1.19048	0.21	1.07527	0.39	1.0989	0.39	61888838	Q99N15	Molecular Function	GO:0016491	oxidoreductase activity
NP_058043.3	hydroxyacyl-Coenzyme A dehydrogenase type II [Mus musculus]	532.68	0.88	0.21	1.19048	0.21	1.07527	0.39	1.0989	0.39	61888838	Q99N15	Biological Process	GO:0008152	metabolic process
NP_058043.3	hydroxyacyl-Coenzyme A dehydrogenase type II [Mus musculus]	532.68	0.88	0.21	1.19048	0.21	1.07527	0.39	1.0989	0.39	61888838	Q99N15	Cellular Location	GO:0005739	mitochondrion
NP_058043.3	hydroxyacyl-Coenzyme A dehydrogenase type II [Mus musculus]	532.68	0.88	0.21	1.19048	0.21	1.07527	0.39	1.0989	0.39	61888838	Q99N15	Cellular Location	GO:0005743	mitochondrial inner membrane
NP_058043.3	hydroxyacyl-Coenzyme A dehydrogenase type II [Mus musculus]	532.68	0.88	0.21	1.19048	0.21	1.07527	0.39	1.0989	0.39	61888838	Q99N15	Cellular Location	GO:0005783	endoplasmic reticulum
NP_849209.1	hydroxyacyl-Coenzyme A dehydrogenase/3-ketoacyl-Coenzyme A thiolase/enoyl-Coenzyme A hydratase (trifunctional protein), alpha subunit [Mus musculus]	1013.54	1.16	0.85	1.33333	0.07	1.20482	0.04	1.51515	0.01	33859811	Q5U5Y5	Molecular Function	GO:0003857	3-hydroxyacyl-CoA dehydrogenase activity
NP_849209.1	hydroxyacyl-Coenzyme A dehydrogenase/3-ketoacyl-Coenzyme A thiolase/enoyl-Coenzyme A hydratase (trifunctional protein), alpha subunit [Mus musculus]	1013.54	1.16	0.85	1.33333	0.07	1.20482	0.04	1.51515	0.01	33859811	Q5U5Y5	Molecular Function	GO:0004300	enoyl-CoA hydratase activity
NP_849209.1	hydroxyacyl-Coenzyme A dehydrogenase/3-ketoacyl-Coenzyme A thiolase/enoyl-Coenzyme A hydratase (trifunctional protein), alpha subunit [Mus musculus]	1013.54	1.16	0.85	1.33333	0.07	1.20482	0.04	1.51515	0.01	33859811	Q5U5Y5	Molecular Function	GO:0016491	oxidoreductase activity
NP_849209.1	hydroxyacyl-Coenzyme A dehydrogenase/3-ketoacyl-Coenzyme A thiolase/enoyl-Coenzyme A hydratase (trifunctional protein), alpha subunit [Mus musculus]	1013.54	1.16	0.85	1.33333	0.07	1.20482	0.04	1.51515	0.01	33859811	Q5U5Y5	Molecular Function	GO:0016509	long-chain-3-hydroxyacyl-CoA dehydrogenase activity
NP_849209.1	hydroxyacyl-Coenzyme A dehydrogenase/3-ketoacyl-Coenzyme A thiolase/enoyl-Coenzyme A hydratase (trifunctional protein), alpha subunit [Mus musculus]	1013.54	1.16	0.85	1.33333	0.07	1.20482	0.04	1.51515	0.01	33859811	Q5U5Y5	Molecular Function	GO:0050662	coenzyme binding
NP_849209.1	hydroxyacyl-Coenzyme A dehydrogenase/3-ketoacyl-Coenzyme A thiolase/enoyl-Coenzyme A hydratase (trifunctional protein), alpha subunit [Mus musculus]	1013.54	1.16	0.85	1.33333	0.07	1.20482	0.04	1.51515	0.01	33859811	Q5U5Y5	Biological Process	GO:0006631	fatty acid metabolic process
NP_849209.1	hydroxyacyl-Coenzyme A dehydrogenase/3-ketoacyl-Coenzyme A thiolase/enoyl-Coenzyme A hydratase (trifunctional protein), alpha subunit [Mus musculus]	1013.54	1.16	0.85	1.33333	0.07	1.20482	0.04	1.51515	0.01	33859811	Q5U5Y5	Biological Process	GO:0006635	fatty acid beta-oxidation
NP_849209.1	hydroxyacyl-Coenzyme A dehydrogenase/3-ketoacyl-Coenzyme A thiolase/enoyl-Coenzyme A hydratase (trifunctional protein), alpha subunit [Mus musculus]	1013.54	1.16	0.85	1.33333	0.07	1.20482	0.04	1.51515	0.01	33859811	Q5U5Y5	Biological Process	GO:0008152	metabolic process
NP_849209.1	hydroxyacyl-Coenzyme A dehydrogenase/3-ketoacyl-Coenzyme A thiolase/enoyl-Coenzyme A hydratase (trifunctional protein), alpha subunit [Mus musculus]	1013.54	1.16	0.85	1.33333	0.07	1.20482	0.04	1.51515	0.01	33859811	Q5U5Y5	Cellular Location	GO:0005739	mitochondrion
NP_849209.1	hydroxyacyl-Coenzyme A dehydrogenase/3-ketoacyl-Coenzyme A thiolase/enoyl-Coenzyme A hydratase (trifunctional protein), alpha subunit [Mus musculus]	1013.54	1.16	0.85	1.33333	0.07	1.20482	0.04	1.51515	0.01	33859811	Q5U5Y5	Cellular Location	GO:0005743	mitochondrial inner membrane
NP_849209.1	hydroxyacyl-Coenzyme A dehydrogenase/3-ketoacyl-Coenzyme A thiolase/enoyl-Coenzyme A hydratase (trifunctional protein), alpha subunit [Mus musculus]	1013.54	1.16	0.85	1.33333	0.07	1.20482	0.04	1.51515	0.01	33859811	Q5U5Y5	Cellular Location	GO:0016507	fatty acid beta-oxidation multienzyme complex
NP_619595.2	hypothetical protein LOC192136 [Mus musculus]	335.5							WT only
NP_663423.2	hypothetical protein LOC217830 [Mus musculus]	572.02							1.44928	0.02	31981784	Q8BH86	Cellular Location	GO:0005739	mitochondrion
NP_001013784.1	hypothetical protein LOC240549 [Mus musculus]	280.21	0.9	0.34
NP_722502.1	hypothetical protein LOC264895 [Mus musculus]	958.68	0.94	0.27	1.21951	0.18					24418933	Q3U5G9	Molecular Function	GO:0016874	ligase activity
NP_722502.1	hypothetical protein LOC264895 [Mus musculus]	958.68	0.94	0.27	1.21951	0.18					24418933	Q3U5G9	Biological Process	GO:0008152	metabolic process
NP_001020559.1	hypothetical protein LOC433182 [Mus musculus]	766.17			1.14943	0.21					70794816	P17182	Molecular Function	GO:0000287	magnesium ion binding
NP_001020559.1	hypothetical protein LOC433182 [Mus musculus]	766.17			1.14943	0.21					70794816	P17182	Molecular Function	GO:0004634	phosphopyruvate hydratase activity
NP_001020559.1	hypothetical protein LOC433182 [Mus musculus]	766.17			1.14943	0.21					70794816	P17182	Molecular Function	GO:0016829	lyase activity
NP_001020559.1	hypothetical protein LOC433182 [Mus musculus]	766.17			1.14943	0.21					70794816	P17182	Biological Process	GO:0006096	glycolysis
NP_001020559.1	hypothetical protein LOC433182 [Mus musculus]	766.17			1.14943	0.21					70794816	P17182	Cellular Location	GO:0000015	phosphopyruvate hydratase complex
NP_083826.1	hypothetical protein LOC64697 [Mus musculus]	267.81	WT only						0.934579	0.84	19482166	Q9DCY0	Molecular Function	GO:0043015	gamma-tubulin binding
NP_083826.1	hypothetical protein LOC64697 [Mus musculus]	267.81	WT only						0.934579	0.84	19482166	Q9DCY0	Biological Process	GO:0000074	regulation of progression through cell cycle
NP_083826.1	hypothetical protein LOC64697 [Mus musculus]	267.81	WT only						0.934579	0.84	19482166	Q9DCY0	Cellular Location	GO:0005739	mitochondrion
NP_083826.1	hypothetical protein LOC64697 [Mus musculus]	267.81	WT only						0.934579	0.84	19482166	Q9DCY0	Cellular Location	GO:0005813	centrosome
NP_080428.1	hypothetical protein LOC67432 [Mus musculus]	401.49	0.82	0.12					1.17647	0.14	13385656	Q9DCU9	Molecular Function	GO:0016829	lyase activity
NP_080428.1	hypothetical protein LOC67432 [Mus musculus]	401.49	0.82	0.12					1.17647	0.14	13385656	Q9DCU9	Biological Process	GO:0008152	metabolic process
NP_080428.1	hypothetical protein LOC67432 [Mus musculus]	401.49	0.82	0.12					1.17647	0.14	13385656	Q9DCU9	Cellular Location	GO:0005739	mitochondrion
NP_766599.1	isocitrate dehydrogenase 2 (NADP+), mitochondrial [Mus musculus]	580.87	1.17	0.9	1.0989	0.21	1.11111	0	1.26582	0
NP_083849.1	isocitrate dehydrogenase 3 (NAD+) alpha [Mus musculus]	1519.56			0.869565	1	0.884956	0.97	1.51515	0	18250284	Q9D6R2	Molecular Function	GO:0004449	isocitrate dehydrogenase (NAD+) activity
NP_083849.1	isocitrate dehydrogenase 3 (NAD+) alpha [Mus musculus]	1519.56			0.869565	1	0.884956	0.97	1.51515	0	18250284	Q9D6R2	Molecular Function	GO:0004450	isocitrate dehydrogenase (NADP+) activity
NP_083849.1	isocitrate dehydrogenase 3 (NAD+) alpha [Mus musculus]	1519.56			0.869565	1	0.884956	0.97	1.51515	0	18250284	Q9D6R2	Molecular Function	GO:0016491	oxidoreductase activity
NP_083849.1	isocitrate dehydrogenase 3 (NAD+) alpha [Mus musculus]	1519.56			0.869565	1	0.884956	0.97	1.51515	0	18250284	Q9D6R2	Molecular Function	GO:0016616	oxidoreductase activity, acting on the CH-OH group of donors, NAD or NADP as acceptor
NP_083849.1	isocitrate dehydrogenase 3 (NAD+) alpha [Mus musculus]	1519.56			0.869565	1	0.884956	0.97	1.51515	0	18250284	Q9D6R2	Biological Process	GO:0006099	tricarboxylic acid cycle
NP_083849.1	isocitrate dehydrogenase 3 (NAD+) alpha [Mus musculus]	1519.56			0.869565	1	0.884956	0.97	1.51515	0	18250284	Q9D6R2	Biological Process	GO:0008152	metabolic process
NP_083849.1	isocitrate dehydrogenase 3 (NAD+) alpha [Mus musculus]	1519.56			0.869565	1	0.884956	0.97	1.51515	0	18250284	Q9D6R2	Cellular Location	GO:0005739	mitochondrion
NP_570954.1	isocitrate dehydrogenase 3, beta subunit [Mus musculus]	1282.76			1.02041	0.45	1.20482	0.14	1.14943	0.25	18700024	Q91VA7	Molecular Function	GO:0004449	isocitrate dehydrogenase (NAD+) activity
NP_570954.1	isocitrate dehydrogenase 3, beta subunit [Mus musculus]	1282.76			1.02041	0.45	1.20482	0.14	1.14943	0.25	18700024	Q91VA7	Molecular Function	GO:0016491	oxidoreductase activity
NP_570954.1	isocitrate dehydrogenase 3, beta subunit [Mus musculus]	1282.76			1.02041	0.45	1.20482	0.14	1.14943	0.25	18700024	Q91VA7	Molecular Function	GO:0016616	oxidoreductase activity, acting on the CH-OH group of donors, NAD or NADP as acceptor
NP_570954.1	isocitrate dehydrogenase 3, beta subunit [Mus musculus]	1282.76			1.02041	0.45	1.20482	0.14	1.14943	0.25	18700024	Q91VA7	Biological Process	GO:0006099	tricarboxylic acid cycle
NP_570954.1	isocitrate dehydrogenase 3, beta subunit [Mus musculus]	1282.76			1.02041	0.45	1.20482	0.14	1.14943	0.25	18700024	Q91VA7	Biological Process	GO:0008152	metabolic process
NP_570954.1	isocitrate dehydrogenase 3, beta subunit [Mus musculus]	1282.76			1.02041	0.45	1.20482	0.14	1.14943	0.25	18700024	Q91VA7	Cellular Location	GO:0005615	extracellular space
NP_570954.1	isocitrate dehydrogenase 3, beta subunit [Mus musculus]	1282.76			1.02041	0.45	1.20482	0.14	1.14943	0.25	18700024	Q91VA7	Cellular Location	GO:0005739	mitochondrion
NP_062800.1	isovaleryl coenzyme A dehydrogenase [Mus musculus]	585.96	0.78	0.03	1.05263	0.33	0.746269	0.99	0.840336	0.97
NP_076226.2	L-specific multifunctional beta-oxdiation protein [Mus musculus]	640.71	0.65	0					0.406504	1	31541815	Q91W49	Molecular Function	GO:0003857	3-hydroxyacyl-CoA dehydrogenase activity
NP_076226.2	L-specific multifunctional beta-oxdiation protein [Mus musculus]	640.71	0.65	0					0.406504	1	31541815	Q91W49	Molecular Function	GO:0016491	oxidoreductase activity
NP_076226.2	L-specific multifunctional beta-oxdiation protein [Mus musculus]	640.71	0.65	0					0.406504	1	31541815	Q91W49	Molecular Function	GO:0016829	lyase activity
NP_076226.2	L-specific multifunctional beta-oxdiation protein [Mus musculus]	640.71	0.65	0					0.406504	1	31541815	Q91W49	Molecular Function	GO:0016853	isomerase activity
NP_076226.2	L-specific multifunctional beta-oxdiation protein [Mus musculus]	640.71	0.65	0					0.406504	1	31541815	Q91W49	Molecular Function	GO:0050662	coenzyme binding
NP_076226.2	L-specific multifunctional beta-oxdiation protein [Mus musculus]	640.71	0.65	0					0.406504	1	31541815	Q91W49	Biological Process	GO:0006629	lipid metabolic process
NP_076226.2	L-specific multifunctional beta-oxdiation protein [Mus musculus]	640.71	0.65	0					0.406504	1	31541815	Q91W49	Biological Process	GO:0006635	fatty acid beta-oxidation
NP_076226.2	L-specific multifunctional beta-oxdiation protein [Mus musculus]	640.71	0.65	0					0.406504	1	31541815	Q91W49	Biological Process	GO:0006637	acyl-CoA metabolic process
NP_076226.2	L-specific multifunctional beta-oxdiation protein [Mus musculus]	640.71	0.65	0					0.406504	1	31541815	Q91W49	Biological Process	GO:0008152	metabolic process
NP_076226.2	L-specific multifunctional beta-oxdiation protein [Mus musculus]	640.71	0.65	0					0.406504	1	31541815	Q91W49	Cellular Location	GO:0005739	mitochondrion
NP_076226.2	L-specific multifunctional beta-oxdiation protein [Mus musculus]	640.71	0.65	0					0.406504	1	31541815	Q91W49	Cellular Location	GO:0005777	peroxisome
NP_032643.2	malate dehydrogenase 2, NAD (mitochondrial) [Mus musculus]	1579.53	0.91	0.11	0.970874	0.86	0.763359	1	1.2987	0	31982186	Q8R1P0	Molecular Function	GO:0004459	L-lactate dehydrogenase activity
NP_032643.2	malate dehydrogenase 2, NAD (mitochondrial) [Mus musculus]	1579.53	0.91	0.11	0.970874	0.86	0.763359	1	1.2987	0	31982186	Q8R1P0	Molecular Function	GO:0016491	oxidoreductase activity
NP_032643.2	malate dehydrogenase 2, NAD (mitochondrial) [Mus musculus]	1579.53	0.91	0.11	0.970874	0.86	0.763359	1	1.2987	0	31982186	Q8R1P0	Molecular Function	GO:0030060	L-malate dehydrogenase activity
NP_032643.2	malate dehydrogenase 2, NAD (mitochondrial) [Mus musculus]	1579.53	0.91	0.11	0.970874	0.86	0.763359	1	1.2987	0	31982186	Q8R1P0	Biological Process	GO:0006096	glycolysis
NP_032643.2	malate dehydrogenase 2, NAD (mitochondrial) [Mus musculus]	1579.53	0.91	0.11	0.970874	0.86	0.763359	1	1.2987	0	31982186	Q8R1P0	Biological Process	GO:0006108	malate metabolic process
NP_032643.2	malate dehydrogenase 2, NAD (mitochondrial) [Mus musculus]	1579.53	0.91	0.11	0.970874	0.86	0.763359	1	1.2987	0	31982186	Q8R1P0	Cellular Location	GO:0005739	mitochondrion
NP_032643.2	malate dehydrogenase 2, NAD (mitochondrial) [Mus musculus]	1579.53	0.91	0.11	0.970874	0.86	0.763359	1	1.2987	0	31982186	Q8R1P0	Cellular Location	GO:0005743	mitochondrial inner membrane
NP_663469.1	malic enzyme 2, NAD(+)-dependent, mitochondrial [Mus musculus]	409.89			0.917431	0.7					21703972	Q99KE1	Molecular Function	GO:0004471	malate dehydrogenase (decarboxylating) activity
NP_663469.1	malic enzyme 2, NAD(+)-dependent, mitochondrial [Mus musculus]	409.89			0.917431	0.7					21703972	Q99KE1	Molecular Function	GO:0009055	electron carrier activity
NP_663469.1	malic enzyme 2, NAD(+)-dependent, mitochondrial [Mus musculus]	409.89			0.917431	0.7					21703972	Q99KE1	Molecular Function	GO:0016619	malate dehydrogenase (oxaloacetate-decarboxylating) activity
NP_663469.1	malic enzyme 2, NAD(+)-dependent, mitochondrial [Mus musculus]	409.89			0.917431	0.7					21703972	Q99KE1	Molecular Function	GO:0046872	metal ion binding
NP_663469.1	malic enzyme 2, NAD(+)-dependent, mitochondrial [Mus musculus]	409.89			0.917431	0.7					21703972	Q99KE1	Molecular Function	GO:0051287	NAD binding
NP_663469.1	malic enzyme 2, NAD(+)-dependent, mitochondrial [Mus musculus]	409.89			0.917431	0.7					21703972	Q99KE1	Biological Process	GO:0006090	pyruvate metabolic process
NP_663469.1	malic enzyme 2, NAD(+)-dependent, mitochondrial [Mus musculus]	409.89			0.917431	0.7					21703972	Q99KE1	Biological Process	GO:0006108	malate metabolic process
NP_663469.1	malic enzyme 2, NAD(+)-dependent, mitochondrial [Mus musculus]	409.89			0.917431	0.7					21703972	Q99KE1	Cellular Location	GO:0005739	mitochondrion
NP_062708.1	N-acylsphingosine amidohydrolase (acid ceramidase) 1 [Mus musculus]	466.89			0.925926	0.61					9790019	Q9WV54	Molecular Function	GO:0016787	hydrolase activity
NP_062708.1	N-acylsphingosine amidohydrolase (acid ceramidase) 1 [Mus musculus]	466.89			0.925926	0.61					9790019	Q9WV54	Molecular Function	GO:0017040	ceramidase activity
NP_062708.1	N-acylsphingosine amidohydrolase (acid ceramidase) 1 [Mus musculus]	466.89			0.925926	0.61					9790019	Q9WV54	Cellular Location	GO:0005764	lysosome
NP_149071.1	nudix (nucleoside diphosphate linked moiety X)-type motif 19 [Mus musculus]	1123.26							0.497512	1
NP_077757.1	nudix (nucleoside diphosphate linked moiety X)-type motif 7 isoform 1 [Mus musculus]	493.58	0.43	0							18859595	Q99P30	Molecular Function	GO:0000287	magnesium ion binding
NP_077757.1	nudix (nucleoside diphosphate linked moiety X)-type motif 7 isoform 1 [Mus musculus]	493.58	0.43	0							18859595	Q99P30	Molecular Function	GO:0003986	acetyl-CoA hydrolase activity
NP_077757.1	nudix (nucleoside diphosphate linked moiety X)-type motif 7 isoform 1 [Mus musculus]	493.58	0.43	0							18859595	Q99P30	Molecular Function	GO:0016787	hydrolase activity
NP_077757.1	nudix (nucleoside diphosphate linked moiety X)-type motif 7 isoform 1 [Mus musculus]	493.58	0.43	0							18859595	Q99P30	Molecular Function	GO:0030145	manganese ion binding
NP_077757.1	nudix (nucleoside diphosphate linked moiety X)-type motif 7 isoform 1 [Mus musculus]	493.58	0.43	0							18859595	Q99P30	Biological Process	GO:0015938	coenzyme A catabolic process
NP_077757.1	nudix (nucleoside diphosphate linked moiety X)-type motif 7 isoform 1 [Mus musculus]	493.58	0.43	0							18859595	Q99P30	Biological Process	GO:0046356	acetyl-CoA catabolic process
NP_077757.1	nudix (nucleoside diphosphate linked moiety X)-type motif 7 isoform 1 [Mus musculus]	493.58	0.43	0							18859595	Q99P30	Cellular Location	GO:0005777	peroxisome
NP_077766.2	nudix (nucleoside diphosphate linked moiety X)-type motif 7 isoform 2 [Mus musculus]	525.74	0.44	0
NP_032795.1	ornithine transcarbamylase [Mus musculus]	1421.71	0.79	0							6679184	P11725	Molecular Function	GO:0004585	ornithine carbamoyltransferase activity
NP_032795.1	ornithine transcarbamylase [Mus musculus]	1421.71	0.79	0							6679184	P11725	Molecular Function	GO:0016597	amino acid binding
NP_032795.1	ornithine transcarbamylase [Mus musculus]	1421.71	0.79	0							6679184	P11725	Molecular Function	GO:0016740	transferase activity
NP_032795.1	ornithine transcarbamylase [Mus musculus]	1421.71	0.79	0							6679184	P11725	Biological Process	GO:0000050	urea cycle
NP_032795.1	ornithine transcarbamylase [Mus musculus]	1421.71	0.79	0							6679184	P11725	Biological Process	GO:0006526	arginine biosynthetic process
NP_032795.1	ornithine transcarbamylase [Mus musculus]	1421.71	0.79	0							6679184	P11725	Biological Process	GO:0008652	amino acid biosynthetic process
NP_032795.1	ornithine transcarbamylase [Mus musculus]	1421.71	0.79	0							6679184	P11725	Cellular Location	GO:0005739	mitochondrion
NP_032795.1	ornithine transcarbamylase [Mus musculus]	1421.71	0.79	0							6679184	P11725	Cellular Location	GO:0005743	mitochondrial inner membrane
NP_032795.1	ornithine transcarbamylase [Mus musculus]	1421.71	0.79	0							6679184	P11725	Cellular Location	GO:0009348	ornithine carbamoyltransferase complex
NP_032933.1	peptidylprolyl isomerase A [Mus musculus]	250.59			1.19048	0.15
NP_031478.1	peroxiredoxin 3 [Mus musculus]	192.39	0.93	0.38	1.04167	0.33	0.943396	0.68	1.17647	0.13
NP_036151.1	peroxiredoxin 5 precursor [Mus musculus]	357.25	0.87	0.25	0.925926	0.92	0.970874	0.66	1.0101	0.44	6755114	P99029	Molecular Function	GO:0016491	oxidoreductase activity
NP_036151.1	peroxiredoxin 5 precursor [Mus musculus]	357.25	0.87	0.25	0.925926	0.92	0.970874	0.66	1.0101	0.44	6755114	P99029	Molecular Function	GO:0051920	peroxiredoxin activity
NP_036151.1	peroxiredoxin 5 precursor [Mus musculus]	357.25	0.87	0.25	0.925926	0.92	0.970874	0.66	1.0101	0.44	6755114	P99029	Cellular Location	GO:0005739	mitochondrion
NP_036151.1	peroxiredoxin 5 precursor [Mus musculus]	357.25	0.87	0.25	0.925926	0.92	0.970874	0.66	1.0101	0.44	6755114	P99029	Cellular Location	GO:0005777	peroxisome
NP_076012.2	peroxisomal trans 2-enoyl CoA reductase [Mus musculus]	337.67	1.11	0.68					0.689655	1	31980804	Q99MZ7	Molecular Function	GO:0016491	oxidoreductase activity
NP_076012.2	peroxisomal trans 2-enoyl CoA reductase [Mus musculus]	337.67	1.11	0.68					0.689655	1	31980804	Q99MZ7	Molecular Function	GO:0019166	trans-2-enoyl-CoA reductase (NADPH) activity
NP_076012.2	peroxisomal trans 2-enoyl CoA reductase [Mus musculus]	337.67	1.11	0.68					0.689655	1	31980804	Q99MZ7	Biological Process	GO:0006633	fatty acid biosynthetic process
NP_076012.2	peroxisomal trans 2-enoyl CoA reductase [Mus musculus]	337.67	1.11	0.68					0.689655	1	31980804	Q99MZ7	Biological Process	GO:0008152	metabolic process
NP_076012.2	peroxisomal trans 2-enoyl CoA reductase [Mus musculus]	337.67	1.11	0.68					0.689655	1	31980804	Q99MZ7	Cellular Location	GO:0005739	mitochondrion
NP_076012.2	peroxisomal trans 2-enoyl CoA reductase [Mus musculus]	337.67	1.11	0.68					0.689655	1	31980804	Q99MZ7	Cellular Location	GO:0005777	peroxisome
NP_075907.1	phosphoglycerate mutase 1 [Mus musculus]	137.5			Diabetic only
XP_985387.1	PREDICTED: agmatine ureohydrolase (agmatinase) [Mus musculus]	255.62	1.04	0.52							94372612	Q14BN7	Molecular Function	GO:0004053	arginase activity
XP_985387.1	PREDICTED: agmatine ureohydrolase (agmatinase) [Mus musculus]	255.62	1.04	0.52							94372612	Q14BN7	Molecular Function	GO:0008783	agmatinase activity
XP_985387.1	PREDICTED: agmatine ureohydrolase (agmatinase) [Mus musculus]	255.62	1.04	0.52							94372612	Q14BN7	Molecular Function	GO:0016787	hydrolase activity
XP_985387.1	PREDICTED: agmatine ureohydrolase (agmatinase) [Mus musculus]	255.62	1.04	0.52							94372612	Q14BN7	Molecular Function	GO:0046872	metal ion binding
XP_985387.1	PREDICTED: agmatine ureohydrolase (agmatinase) [Mus musculus]	255.62	1.04	0.52							94372612	Q14BN7	Biological Process	GO:0006527	arginine catabolic process
XP_985387.1	PREDICTED: agmatine ureohydrolase (agmatinase) [Mus musculus]	255.62	1.04	0.52							94372612	Q14BN7	Biological Process	GO:0006596	polyamine biosynthetic process
XP_985387.1	PREDICTED: agmatine ureohydrolase (agmatinase) [Mus musculus]	255.62	1.04	0.52							94372612	Q14BN7	Cellular Location	GO:0005615	extracellular space
XP_129769.6	PREDICTED: carbamoyl-phosphate synthetase 1 isoform 1 [Mus musculus]	11212.3	1.06	1
XP_906671.1	PREDICTED: carbamoyl-phosphate synthetase 1 isoform 2 [Mus musculus]	3036.68	1.02	0.78
XP_905264.1	PREDICTED: glutaminase isoform 3 [Mus musculus]	298.81			0.884956	0.64
XP_905269.1	PREDICTED: glutaminase isoform 4 [Mus musculus]	316.13			0.900901	0.74					82878981	XP_905269	Molecular Function	GO:0004359	glutaminase activity
XP_905269.1	PREDICTED: glutaminase isoform 4 [Mus musculus]	316.13			0.900901	0.74					82878981	XP_905269	Biological Process	GO:0006541	glutamine metabolic process
XP_905359.1	PREDICTED: glutathione S-transferase, mu 7 isoform 4 [Mus musculus]	191.09			1.47059	0.19
XP_905367.1	PREDICTED: glutathione S-transferase, mu 7 isoform 5 [Mus musculus]	177.87			1.49254	0.26
XP_488540.2	PREDICTED: hypothetical protein LOC338350 isoform 1 [Mus musculus]	398.41					1.14943	0.34	0.925926	0.64
XP_904660.1	PREDICTED: hypothetical protein LOC338350 isoform 2 [Mus musculus]	286.83					1.19048	0.31	0.943396	0.6
XP_898273.1	PREDICTED: similar to 10 kDa heat shock protein, mitochondrial (Hsp10) (10 kDa chaperonin) (CPN10) [Mus musculus]	509.96	0.84	0.05	0.854701	0.98	1.02041	0.37	0.980392	0.69	82996341	Q9JI95	Molecular Function	GO:0005524	ATP binding
XP_898273.1	PREDICTED: similar to 10 kDa heat shock protein, mitochondrial (Hsp10) (10 kDa chaperonin) (CPN10) [Mus musculus]	509.96	0.84	0.05	0.854701	0.98	1.02041	0.37	0.980392	0.69	82996341	Q9JI95	Molecular Function	GO:0008083	growth factor activity
XP_898273.1	PREDICTED: similar to 10 kDa heat shock protein, mitochondrial (Hsp10) (10 kDa chaperonin) (CPN10) [Mus musculus]	509.96	0.84	0.05	0.854701	0.98	1.02041	0.37	0.980392	0.69	82996341	Q9JI95	Biological Process	GO:0006457	protein folding
XP_984323.1	PREDICTED: similar to 3-hydroxy-3-methylglutaryl-Coenzyme A synthase 2 [Mus musculus]	902.8	1.01	0.56
XP_001000566.1	PREDICTED: similar to acyl-Coenzyme A dehydrogenase family, member 10 isoform 1 [Mus musculus]	286.83					1.11111	0.4	0.925926	0.64
XP_001000582.1	PREDICTED: similar to acyl-Coenzyme A dehydrogenase family, member 10 isoform 2 [Mus musculus]	286.83					1.14943	0.37	0.934579	0.63	94376691	XP_001000582	Molecular Function	GO:0003995	acyl-CoA dehydrogenase activity
XP_001000582.1	PREDICTED: similar to acyl-Coenzyme A dehydrogenase family, member 10 isoform 2 [Mus musculus]	286.83					1.14943	0.37	0.934579	0.63	94376691	XP_001000582	Molecular Function	GO:0050660	FAD binding
XP_001000582.1	PREDICTED: similar to acyl-Coenzyme A dehydrogenase family, member 10 isoform 2 [Mus musculus]	286.83					1.14943	0.37	0.934579	0.63	94376691	XP_001000582	Biological Process	GO:0006118	electron transport
XP_001000582.1	PREDICTED: similar to acyl-Coenzyme A dehydrogenase family, member 10 isoform 2 [Mus musculus]	286.83					1.14943	0.37	0.934579	0.63	94376691	XP_001000582	Biological Process	GO:0008152	metabolic process
XP_001000598.1	PREDICTED: similar to acyl-Coenzyme A dehydrogenase family, member 10 isoform 3 [Mus musculus]	398.41					0.934579	0.62	1	0.53
XP_921248.1	PREDICTED: similar to acyl-Coenzyme A dehydrogenase family, member 10 isoform 4 [Mus musculus]	398.41					1.08696	0.27	0.934579	0.64	82898513	Q8BZP6	Molecular Function	GO:0003995	acyl-CoA dehydrogenase activity
XP_921248.1	PREDICTED: similar to acyl-Coenzyme A dehydrogenase family, member 10 isoform 4 [Mus musculus]	398.41					1.08696	0.27	0.934579	0.64	82898513	Q8BZP6	Molecular Function	GO:0050660	FAD binding
XP_921248.1	PREDICTED: similar to acyl-Coenzyme A dehydrogenase family, member 10 isoform 4 [Mus musculus]	398.41					1.08696	0.27	0.934579	0.64	82898513	Q8BZP6	Biological Process	GO:0006118	electron transport
XP_921248.1	PREDICTED: similar to acyl-Coenzyme A dehydrogenase family, member 10 isoform 4 [Mus musculus]	398.41					1.08696	0.27	0.934579	0.64	82898513	Q8BZP6	Biological Process	GO:0008152	metabolic process
XP_921248.1	PREDICTED: similar to acyl-Coenzyme A dehydrogenase family, member 10 isoform 4 [Mus musculus]	398.41					1.08696	0.27	0.934579	0.64	82898513	Q8BZP6	Cellular Location	GO:0005615	extracellular space
XP_929217.1	PREDICTED: similar to acyl-Coenzyme A dehydrogenase family, member 10 isoform 5 [Mus musculus]	286.83					1.1236	0.44	0.970874	0.58
XP_920494.1	PREDICTED: similar to agmatine ureohydrolase (agmatinase) [Mus musculus]	255.62	1.07	0.59
XP_979694.1	PREDICTED: similar to aldo-keto reductase family 1, member A4 (aldehyde reductase) [Mus musculus]	361.49							1.53846	0.04
XP_923115.2	PREDICTED: similar to Aspartate aminotransferase, mitochondrial precursor (Transaminase A) (Glutamate oxaloacetate transaminase 2) [Mus musculus]	1195.46	0.78	0	0.689655	1	1.19048	0.03	1.5873	0	94410786	XP_923115	Molecular Function	GO:0003824	catalytic activity
XP_923115.2	PREDICTED: similar to Aspartate aminotransferase, mitochondrial precursor (Transaminase A) (Glutamate oxaloacetate transaminase 2) [Mus musculus]	1195.46	0.78	0	0.689655	1	1.19048	0.03	1.5873	0	94410786	XP_923115	Molecular Function	GO:0008483	transaminase activity
XP_923115.2	PREDICTED: similar to Aspartate aminotransferase, mitochondrial precursor (Transaminase A) (Glutamate oxaloacetate transaminase 2) [Mus musculus]	1195.46	0.78	0	0.689655	1	1.19048	0.03	1.5873	0	94410786	XP_923115	Biological Process	GO:0006520	amino acid metabolic process
XP_923115.2	PREDICTED: similar to Aspartate aminotransferase, mitochondrial precursor (Transaminase A) (Glutamate oxaloacetate transaminase 2) [Mus musculus]	1195.46	0.78	0	0.689655	1	1.19048	0.03	1.5873	0	94410786	XP_923115	Biological Process	GO:0009058	biosynthetic process
XP_986046.1	PREDICTED: similar to butyryl Coenzyme A synthetase 1 [Mus musculus]	1110.1	0.73	0					1.26582	0
XP_998540.1	PREDICTED: similar to Carbamoyl-phosphate synthase [ammonia], mitochondrial precursor (Carbamoyl-phosphate synthetase I) (CPSase I) isoform 1 [Mus musculus]	3036.68	1.04	0.82
XP_998560.1	PREDICTED: similar to Carbamoyl-phosphate synthase [ammonia], mitochondrial precursor (Carbamoyl-phosphate synthetase I) (CPSase I) isoform 2 [Mus musculus]	11212.3	1.06	1
XP_917169.1	PREDICTED: similar to Carbamoyl-phosphate synthase [ammonia], mitochondrial precursor (Carbamoyl-phosphate synthetase I) (CPSase I) isoform 4 [Mus musculus]	10975.8	1.06	1
XP_991941.1	PREDICTED: similar to Carbamoyl-phosphate synthase [ammonia], mitochondrial precursor (Carbamoyl-phosphate synthetase I) (CPSase I) isoform 5 [Mus musculus]	10894.5	1.06	0.99
XP_914990.2	PREDICTED: similar to Electron transfer flavoprotein beta-subunit (Beta-ETF) [Mus musculus]	558.75	0.85	0.12	1.19048	0.18	1.08696	0.15	1.0101	0.46	94410719	XP_914990	Molecular Function	GO:0009055	electron carrier activity
XP_914990.2	PREDICTED: similar to Electron transfer flavoprotein beta-subunit (Beta-ETF) [Mus musculus]	558.75	0.85	0.12	1.19048	0.18	1.08696	0.15	1.0101	0.46	94410719	XP_914990	Biological Process	GO:0006118	electron transport
XP_001003118.1	PREDICTED: similar to electron transferring flavoprotein, beta polypeptide [Mus musculus]	787.46	0.86	0.04	1.0101	0.43	1.05263	0.11	1.05263	0.21
XP_001006583.1	PREDICTED: similar to enolase 1, alpha non-neuron [Mus musculus]	327.27			1.19048	0.34
XP_992848.1	PREDICTED: similar to Glutamate dehydrogenase 1, mitochondrial precursor (GDH) isoform 2 [Mus musculus]	2364.21	0.73	0	1.26582	0	0.8	0.7	1.63934	0
XP_989835.1	PREDICTED: similar to Glutaminase kidney isoform, mitochondrial precursor (GLS) (L-glutamine amidohydrolase) (K-glutaminase) isoform 1 [Mus musculus]	298.81			0.892857	0.59
XP_990037.1	PREDICTED: similar to Glutaminase kidney isoform, mitochondrial precursor (GLS) (L-glutamine amidohydrolase) (K-glutaminase) isoform 3 [Mus musculus]	316.13			0.925926	0.72
XP_896015.1	PREDICTED: similar to Glutathione S-transferase Mu 2 (GST class-mu 2) (Glutathione S-transferase pmGT2) (GST 5-5) [Mus musculus]	133.43			1.1236	0.4					82996105	XP_896015	Molecular Function	GO:0004364	glutathione transferase activity
XP_896015.1	PREDICTED: similar to Glutathione S-transferase Mu 2 (GST class-mu 2) (Glutathione S-transferase pmGT2) (GST 5-5) [Mus musculus]	133.43			1.1236	0.4					82996105	XP_896015	Biological Process	GO:0008152	metabolic process
XP_993199.1	PREDICTED: similar to Glutathione S-transferase Yb-3 (Chain 4) (GST Yb3) (GST class-mu 3) isoform 1 [Mus musculus]	217.04			1.08696	0.37
XP_927955.1	PREDICTED: similar to Glutathione S-transferase Yb-3 (Chain 4) (GST Yb3) (GST class-mu 3) isoform 11 [Mus musculus]	191.09			1.63934	0.2
XP_927960.1	PREDICTED: similar to Glutathione S-transferase Yb-3 (Chain 4) (GST Yb3) (GST class-mu 3) isoform 12 [Mus musculus]	177.87			1.28205	0.3
XP_359308.2	PREDICTED: similar to Glutathione S-transferase Yb-3 (Chain 4) (GST Yb3) (GST class-mu 3) isoform 2 [Mus musculus]	191.09			1.42857	0.3
XP_993269.1	PREDICTED: similar to Glutathione S-transferase Yb-3 (Chain 4) (GST Yb3) (GST class-mu 3) isoform 3 [Mus musculus]	191.09			1.42857	0.31
XP_993305.1	PREDICTED: similar to Glutathione S-transferase Yb-3 (Chain 4) (GST Yb3) (GST class-mu 3) isoform 4 [Mus musculus]	177.87			1.51515	0.24
XP_993337.1	PREDICTED: similar to Glutathione S-transferase Yb-3 (Chain 4) (GST Yb3) (GST class-mu 3) isoform 5 [Mus musculus]	193.04			1.31579	0.32
XP_908764.2	PREDICTED: similar to Glutathione S-transferase Yb-3 (Chain 4) (GST Yb3) (GST class-mu 3) isoform 6 [Mus musculus]	145.54			1.17647	0.4
XP_908949.1	PREDICTED: similar to Glutathione S-transferase Yb-3 (Chain 4) (GST Yb3) (GST class-mu 3) isoform 8 [Mus musculus]	177.87			1.36986	0.28
XP_998701.1	PREDICTED: similar to Glutathione S-transferase Yb-3 (Chain 4) (GST Yb3) (GST class-mu 3) isoform 9 [Mus musculus]	193.04			1.23457	0.35
XP_001002772.1	PREDICTED: similar to Glyceraldehyde-3-phosphate dehydrogenase (GAPDH) [Mus musculus]	227.36			1.25	0.23
XP_992026.1	PREDICTED: similar to heat shock protein 8 [Mus musculus]	703.27			1.17647	0.23
XP_984258.1	PREDICTED: similar to hexokinase 1 isoform 8 [Mus musculus]	1293.15			0.877193	0.79
XP_983987.1	PREDICTED: similar to hexokinase 1 isoform HKI-R isoform 1 [Mus musculus]	308.59			1.08696	0.41
XP_984038.1	PREDICTED: similar to Hexokinase-1 (Hexokinase type I) (HK I) (Brain form hexokinase) isoform 2 [Mus musculus]	968.34			0.826446	0.85
XP_984334.1	PREDICTED: similar to Hexokinase-1 (Hexokinase type I) (HK I) (Hexokinase, tumor isozyme) isoform 10 [Mus musculus]	1356.74			0.862069	0.9
XP_984381.1	PREDICTED: similar to Hexokinase-1 (Hexokinase type I) (HK I) (Hexokinase, tumor isozyme) isoform 11 [Mus musculus]	1356.74			0.869565	0.85
XP_984070.1	PREDICTED: similar to Hexokinase-1 (Hexokinase type I) (HK I) (Hexokinase, tumor isozyme) isoform 3 [Mus musculus]	1356.74			0.840336	0.89
XP_984107.1	PREDICTED: similar to Hexokinase-1 (Hexokinase type I) (HK I) (Hexokinase, tumor isozyme) isoform 4 [Mus musculus]	1106.05			0.869565	0.84
XP_984146.1	PREDICTED: similar to Hexokinase-1 (Hexokinase type I) (HK I) (Hexokinase, tumor isozyme) isoform 5 [Mus musculus]	1348.92			0.862069	0.88
XP_984188.1	PREDICTED: similar to Hexokinase-1 (Hexokinase type I) (HK I) (Hexokinase, tumor isozyme) isoform 6 [Mus musculus]	1350.58			0.862069	0.9
XP_984217.1	PREDICTED: similar to Hexokinase-1 (Hexokinase type I) (HK I) (Hexokinase, tumor isozyme) isoform 7 [Mus musculus]	1348.92			0.877193	0.81
XP_984296.1	PREDICTED: similar to Hexokinase-1 (Hexokinase type I) (HK I) (Hexokinase, tumor isozyme) isoform 9 [Mus musculus]	1356.74			0.900901	0.74
XP_916910.2	PREDICTED: similar to isochorismatase domain containing 2 [Mus musculus]	692.04	0.79	0.09	1.03093	0.49	1.1236	0.38	1.26582	0.02
XP_999777.1	PREDICTED: similar to Phosphoglycerate mutase 1 (Phosphoglycerate mutase isozyme B) (PGAM-B) (BPG-dependent PGAM 1) [Mus musculus]	237.39			1.17647	0.35
XP_979732.1	PREDICTED: similar to polyubiquitin [Mus musculus]	195.61			0.990099	0.54					94370512	XP_979732	Biological Process	GO:0006464	protein modification
XP_001001919.1	PREDICTED: similar to polyubiquitin isoform 3 [Mus musculus]	212.85			0.980392	0.46					94375391	Q5SX22	Biological Process	GO:0006464	protein modification
XP_001001919.1	PREDICTED: similar to polyubiquitin isoform 3 [Mus musculus]	212.85			0.980392	0.46					94375391	Q5SX22	Cellular Location	GO:0005634	nucleus
XP_984703.1	PREDICTED: similar to Pyruvate kinase isozyme M2 isoform 3 [Mus musculus]	326.95			1.14943	0.31
XP_984927.1	PREDICTED: similar to Pyruvate kinase isozymes M1/M2 (Pyruvate kinase muscle isozyme) isoform 10 [Mus musculus]	536.35			1.05263	0.45
XP_984957.1	PREDICTED: similar to Pyruvate kinase isozymes M1/M2 (Pyruvate kinase muscle isozyme) isoform 11 [Mus musculus]	536.35			1.05263	0.39
XP_984670.1	PREDICTED: similar to Pyruvate kinase isozymes M1/M2 (Pyruvate kinase muscle isozyme) isoform 2 [Mus musculus]	536.35			1.04167	0.42
XP_984746.1	PREDICTED: similar to Pyruvate kinase isozymes M1/M2 (Pyruvate kinase muscle isozyme) isoform 4 [Mus musculus]	536.35			1.03093	0.47
XP_984779.1	PREDICTED: similar to Pyruvate kinase isozymes M1/M2 (Pyruvate kinase muscle isozyme) isoform 5 [Mus musculus]	536.35			1.03093	0.39
XP_984819.1	PREDICTED: similar to Pyruvate kinase isozymes M1/M2 (Pyruvate kinase muscle isozyme) isoform 6 [Mus musculus]	588.46			1	0.5
XP_984847.1	PREDICTED: similar to Pyruvate kinase isozymes M1/M2 (Pyruvate kinase muscle isozyme) isoform 7 [Mus musculus]	536.35			1.06383	0.37
XP_984873.1	PREDICTED: similar to Pyruvate kinase isozymes M1/M2 (Pyruvate kinase muscle isozyme) isoform 8 [Mus musculus]	541.54			1.1236	0.25
XP_984899.1	PREDICTED: similar to Pyruvate kinase isozymes M1/M2 (Pyruvate kinase muscle isozyme) isoform 9 [Mus musculus]	536.35			1.0101	0.45
XP_997685.1	PREDICTED: similar to ribosomal protein S27a [Mus musculus]	200.21			0.990099	0.5
XP_930453.1	PREDICTED: similar to ribosomal protein S27a isoform 2 [Mus musculus]	131.5			0.952381	0.56					82902501	XP_930453	Molecular Function	GO:0003735	structural constituent of ribosome
XP_930453.1	PREDICTED: similar to ribosomal protein S27a isoform 2 [Mus musculus]	131.5			0.952381	0.56					82902501	XP_930453	Biological Process	GO:0006412	translation
XP_930453.1	PREDICTED: similar to ribosomal protein S27a isoform 2 [Mus musculus]	131.5			0.952381	0.56					82902501	XP_930453	Biological Process	GO:0006464	protein modification
XP_930453.1	PREDICTED: similar to ribosomal protein S27a isoform 2 [Mus musculus]	131.5			0.952381	0.56					82902501	XP_930453	Cellular Location	GO:0005622	intracellular
XP_930453.1	PREDICTED: similar to ribosomal protein S27a isoform 2 [Mus musculus]	131.5			0.952381	0.56					82902501	XP_930453	Cellular Location	GO:0005840	ribosome
XP_986430.1	PREDICTED: similar to Serine--pyruvate aminotransferase, mitochondrial precursor (SPT) (Alanine--glyoxylate aminotransferase) (AGT) [Mus musculus]	447.31	1.02	0.57
XP_896808.2	PREDICTED: similar to Stress-70 protein, mitochondrial precursor (75 kDa glucose-regulated protein) (GRP 75) (Peptide-binding protein 74) (PBP74) (P66 MOT) (Mortalin) [Mus musculus]	263.86	1.16	0.8	0.990099	0.49	0.840336	0.76	1.13636	0.2
XP_486246.1	PREDICTED: similar to Tubulin alpha-2 chain (Alpha-tubulin 2) isoform 1 [Mus musculus]	924.91			1.21951	0.09					51765047	ENSMUSP00000077141	Molecular Function	GO:0003924	GTPase activity
XP_486246.1	PREDICTED: similar to Tubulin alpha-2 chain (Alpha-tubulin 2) isoform 1 [Mus musculus]	924.91			1.21951	0.09					51765047	ENSMUSP00000077141	Molecular Function	GO:0005198	structural molecule activity
XP_486246.1	PREDICTED: similar to Tubulin alpha-2 chain (Alpha-tubulin 2) isoform 1 [Mus musculus]	924.91			1.21951	0.09					51765047	ENSMUSP00000077141	Molecular Function	GO:0005525	GTP binding
XP_486246.1	PREDICTED: similar to Tubulin alpha-2 chain (Alpha-tubulin 2) isoform 1 [Mus musculus]	924.91			1.21951	0.09					51765047	ENSMUSP00000077141	Biological Process	GO:0007018	microtubule-based movement
XP_486246.1	PREDICTED: similar to Tubulin alpha-2 chain (Alpha-tubulin 2) isoform 1 [Mus musculus]	924.91			1.21951	0.09					51765047	ENSMUSP00000077141	Biological Process	GO:0051258	protein polymerization
XP_486246.1	PREDICTED: similar to Tubulin alpha-2 chain (Alpha-tubulin 2) isoform 1 [Mus musculus]	924.91			1.21951	0.09					51765047	ENSMUSP00000077141	Cellular Location	GO:0005874	microtubule
XP_486246.1	PREDICTED: similar to Tubulin alpha-2 chain (Alpha-tubulin 2) isoform 1 [Mus musculus]	924.91			1.21951	0.09					51765047	ENSMUSP00000077141	Cellular Location	GO:0043234	protein complex
XP_909750.1	PREDICTED: similar to Tubulin alpha-2 chain (Alpha-tubulin 2) isoform 4 [Mus musculus]	924.91			1.23457	0.07
XP_001005849.1	PREDICTED: similar to tubulin, alpha 1 [Mus musculus]	463.91			1.16279	0.18					94411548	XP_001005849	Molecular Function	GO:0005198	structural molecule activity
XP_001005849.1	PREDICTED: similar to tubulin, alpha 1 [Mus musculus]	463.91			1.16279	0.18					94411548	XP_001005849	Molecular Function	GO:0005525	GTP binding
XP_001005849.1	PREDICTED: similar to tubulin, alpha 1 [Mus musculus]	463.91			1.16279	0.18					94411548	XP_001005849	Biological Process	GO:0007018	microtubule-based movement
XP_001005849.1	PREDICTED: similar to tubulin, alpha 1 [Mus musculus]	463.91			1.16279	0.18					94411548	XP_001005849	Cellular Location	GO:0005874	microtubule
XP_998765.1	PREDICTED: similar to tubulin, alpha 2 isoform 2 isoform 2 [Mus musculus]	856.32			1.21951	0.06
XP_901591.1	PREDICTED: similar to tubulin, alpha 2 isoform 2 isoform 3 [Mus musculus]	856.32			1.21951	0.09
XP_924032.1	PREDICTED: similar to tubulin, alpha 2 isoform 2 isoform 6 [Mus musculus]	856.32			1.23457	0.05					82930691	XP_901591	Molecular Function	GO:0003924	GTPase activity
XP_924032.1	PREDICTED: similar to tubulin, alpha 2 isoform 2 isoform 6 [Mus musculus]	856.32			1.23457	0.05					82930691	XP_901591	Molecular Function	GO:0005198	structural molecule activity
XP_924032.1	PREDICTED: similar to tubulin, alpha 2 isoform 2 isoform 6 [Mus musculus]	856.32			1.23457	0.05					82930691	XP_901591	Molecular Function	GO:0005525	GTP binding
XP_924032.1	PREDICTED: similar to tubulin, alpha 2 isoform 2 isoform 6 [Mus musculus]	856.32			1.23457	0.05					82930691	XP_901591	Biological Process	GO:0007018	microtubule-based movement
XP_924032.1	PREDICTED: similar to tubulin, alpha 2 isoform 2 isoform 6 [Mus musculus]	856.32			1.23457	0.05					82930691	XP_901591	Biological Process	GO:0051258	protein polymerization
XP_924032.1	PREDICTED: similar to tubulin, alpha 2 isoform 2 isoform 6 [Mus musculus]	856.32			1.23457	0.05					82930691	XP_901591	Cellular Location	GO:0005874	microtubule
XP_924032.1	PREDICTED: similar to tubulin, alpha 2 isoform 2 isoform 6 [Mus musculus]	856.32			1.23457	0.05					82930691	XP_901591	Cellular Location	GO:0043234	protein complex
XP_997231.1	PREDICTED: similar to ubiquitin A-52 residue ribosomal protein fusion product 1 [Mus musculus]	203.71			0.990099	0.55					94371557	Q66JP1	Molecular Function	GO:0003735	structural constituent of ribosome
XP_997231.1	PREDICTED: similar to ubiquitin A-52 residue ribosomal protein fusion product 1 [Mus musculus]	203.71			0.990099	0.55					94371557	Q66JP1	Biological Process	GO:0006412	translation
XP_997231.1	PREDICTED: similar to ubiquitin A-52 residue ribosomal protein fusion product 1 [Mus musculus]	203.71			0.990099	0.55					94371557	Q66JP1	Biological Process	GO:0006464	protein modification
XP_997231.1	PREDICTED: similar to ubiquitin A-52 residue ribosomal protein fusion product 1 [Mus musculus]	203.71			0.990099	0.55					94371557	Q66JP1	Cellular Location	GO:0005622	intracellular
XP_997231.1	PREDICTED: similar to ubiquitin A-52 residue ribosomal protein fusion product 1 [Mus musculus]	203.71			0.990099	0.55					94371557	Q66JP1	Cellular Location	GO:0005840	ribosome
XP_001002029.1	PREDICTED: similar to ubiquitin C isoform 18 [Mus musculus]	336.3			1.02041	0.47
XP_001002053.1	PREDICTED: similar to ubiquitin C isoform 22 [Mus musculus]	362.37			1.02041	0.49					94375381	Q8VC46	Biological Process	GO:0006464	protein modification
XP_001002019.1	PREDICTED: similar to ubiquitin C isoform 25 [Mus musculus]	336.3			0.943396	0.62
XP_001002045.1	PREDICTED: similar to ubiquitin C isoform 29 [Mus musculus]	362.37			0.980392	0.51
XP_001001988.1	PREDICTED: similar to ubiquitin C isoform 4 [Mus musculus]	260.32			0.952381	0.56
XP_001001949.1	PREDICTED: similar to ubiquitin C isoform 8 [Mus musculus]	236.44			0.970874	0.54
NP_080111.1	propionyl Coenzyme A carboxylase, beta polypeptide [Mus musculus]	484.6	1.03	0.59	1.03093	0.5	0.819672	0.79	1.11111	0.23	13385310	Q7TMF4	Molecular Function	GO:0003989	acetyl-CoA carboxylase activity
NP_080111.1	propionyl Coenzyme A carboxylase, beta polypeptide [Mus musculus]	484.6	1.03	0.59	1.03093	0.5	0.819672	0.79	1.11111	0.23	13385310	Q7TMF4	Molecular Function	GO:0004075	biotin carboxylase activity
NP_080111.1	propionyl Coenzyme A carboxylase, beta polypeptide [Mus musculus]	484.6	1.03	0.59	1.03093	0.5	0.819672	0.79	1.11111	0.23	13385310	Q7TMF4	Molecular Function	GO:0016874	ligase activity
NP_080111.1	propionyl Coenzyme A carboxylase, beta polypeptide [Mus musculus]	484.6	1.03	0.59	1.03093	0.5	0.819672	0.79	1.11111	0.23	13385310	Q7TMF4	Biological Process	GO:0006633	fatty acid biosynthetic process
NP_080111.1	propionyl Coenzyme A carboxylase, beta polypeptide [Mus musculus]	484.6	1.03	0.59	1.03093	0.5	0.819672	0.79	1.11111	0.23	13385310	Q7TMF4	Cellular Location	GO:0005615	extracellular space
NP_080111.1	propionyl Coenzyme A carboxylase, beta polypeptide [Mus musculus]	484.6	1.03	0.59	1.03093	0.5	0.819672	0.79	1.11111	0.23	13385310	Q7TMF4	Cellular Location	GO:0005739	mitochondrion
NP_080111.1	propionyl Coenzyme A carboxylase, beta polypeptide [Mus musculus]	484.6	1.03	0.59	1.03093	0.5	0.819672	0.79	1.11111	0.23	13385310	Q7TMF4	Cellular Location	GO:0009343	biotin carboxylase complex
NP_032823.1	pyruvate carboxylase [Mus musculus]	2750.97	1.14	0.99	1.20482	0.02			1.0989	0.02
NP_663605.1	pyruvate dehydrogenase kinase, isoenzyme 3 [Mus musculus]	292.97			0.787402	0.67					21704122	Q922H2	Molecular Function	GO:0004673	protein histidine kinase activity
NP_663605.1	pyruvate dehydrogenase kinase, isoenzyme 3 [Mus musculus]	292.97			0.787402	0.67					21704122	Q922H2	Molecular Function	GO:0005524	ATP binding
NP_663605.1	pyruvate dehydrogenase kinase, isoenzyme 3 [Mus musculus]	292.97			0.787402	0.67					21704122	Q922H2	Molecular Function	GO:0016301	kinase activity
NP_663605.1	pyruvate dehydrogenase kinase, isoenzyme 3 [Mus musculus]	292.97			0.787402	0.67					21704122	Q922H2	Biological Process	GO:0005975	carbohydrate metabolic process
NP_663605.1	pyruvate dehydrogenase kinase, isoenzyme 3 [Mus musculus]	292.97			0.787402	0.67					21704122	Q922H2	Biological Process	GO:0006006	glucose metabolic process
NP_663605.1	pyruvate dehydrogenase kinase, isoenzyme 3 [Mus musculus]	292.97			0.787402	0.67					21704122	Q922H2	Biological Process	GO:0016310	phosphorylation
NP_663605.1	pyruvate dehydrogenase kinase, isoenzyme 3 [Mus musculus]	292.97			0.787402	0.67					21704122	Q922H2	Biological Process	GO:0018106	peptidyl-histidine phosphorylation
NP_663605.1	pyruvate dehydrogenase kinase, isoenzyme 3 [Mus musculus]	292.97			0.787402	0.67					21704122	Q922H2	Cellular Location	GO:0005739	mitochondrion
NP_035229.2	pyruvate kinase 3 [Mus musculus]	498.3			1.35135	0.07					31981562	P52480	Molecular Function	GO:0000287	magnesium ion binding
NP_035229.2	pyruvate kinase 3 [Mus musculus]	498.3			1.35135	0.07					31981562	P52480	Molecular Function	GO:0004743	pyruvate kinase activity
NP_035229.2	pyruvate kinase 3 [Mus musculus]	498.3			1.35135	0.07					31981562	P52480	Biological Process	GO:0006096	glycolysis
NP_035229.2	pyruvate kinase 3 [Mus musculus]	498.3			1.35135	0.07					31981562	P52480	Cellular Location	GO:0005739	mitochondrion
NP_077239.1	ribosomal protein S27a [Mus musculus]	200.21			0.980392	0.54					13195690	Q642L7	Molecular Function	GO:0003735	structural constituent of ribosome
NP_077239.1	ribosomal protein S27a [Mus musculus]	200.21			0.980392	0.54					13195690	Q642L7	Biological Process	GO:0006412	translation
NP_077239.1	ribosomal protein S27a [Mus musculus]	200.21			0.980392	0.54					13195690	Q642L7	Biological Process	GO:0006464	protein modification
NP_077239.1	ribosomal protein S27a [Mus musculus]	200.21			0.980392	0.54					13195690	Q642L7	Cellular Location	GO:0005622	intracellular
NP_077239.1	ribosomal protein S27a [Mus musculus]	200.21			0.980392	0.54					13195690	Q642L7	Cellular Location	GO:0005840	ribosome
NP_058566.3	SA hypertension-associated homolog [Mus musculus]	1024.14							0.632911	1	85810990	Q91WI1	Molecular Function	GO:0003824	catalytic activity
NP_058566.3	SA hypertension-associated homolog [Mus musculus]	1024.14							0.632911	1	85810990	Q91WI1	Molecular Function	GO:0015645	fatty-acid ligase activity
NP_058566.3	SA hypertension-associated homolog [Mus musculus]	1024.14							0.632911	1	85810990	Q91WI1	Biological Process	GO:0006633	fatty acid biosynthetic process
NP_058566.3	SA hypertension-associated homolog [Mus musculus]	1024.14							0.632911	1	85810990	Q91WI1	Biological Process	GO:0008152	metabolic process
NP_058566.3	SA hypertension-associated homolog [Mus musculus]	1024.14							0.632911	1	85810990	Q91WI1	Cellular Location	GO:0005739	mitochondrion
NP_058566.3	SA hypertension-associated homolog [Mus musculus]	1024.14							0.632911	1	85810990	Q91WI1	Cellular Location	GO:0005759	mitochondrial matrix
NP_082506.1	serine hydroxymethyl transferase 2 (mitochondrial) [Mus musculus]	578.45	0.93	0.34					1.06383	0.32	21312298	Q99K87	Molecular Function	GO:0004372	glycine hydroxymethyltransferase activity
NP_082506.1	serine hydroxymethyl transferase 2 (mitochondrial) [Mus musculus]	578.45	0.93	0.34					1.06383	0.32	21312298	Q99K87	Molecular Function	GO:0016740	transferase activity
NP_082506.1	serine hydroxymethyl transferase 2 (mitochondrial) [Mus musculus]	578.45	0.93	0.34					1.06383	0.32	21312298	Q99K87	Biological Process	GO:0006544	glycine metabolic process
NP_082506.1	serine hydroxymethyl transferase 2 (mitochondrial) [Mus musculus]	578.45	0.93	0.34					1.06383	0.32	21312298	Q99K87	Biological Process	GO:0006563	L-serine metabolic process
NP_082506.1	serine hydroxymethyl transferase 2 (mitochondrial) [Mus musculus]	578.45	0.93	0.34					1.06383	0.32	21312298	Q99K87	Cellular Location	GO:0005739	mitochondrion
NP_082506.1	serine hydroxymethyl transferase 2 (mitochondrial) [Mus musculus]	578.45	0.93	0.34					1.06383	0.32	21312298	Q99K87	Cellular Location	GO:0005743	mitochondrial inner membrane
NP_063932.1	succinate-CoA ligase, GDP-forming, alpha subunit [Mus musculus]	305.57	1.03	0.53	0.892857	0.73	1.19048	0.11	1.17647	0.05
NP_035636.1	succinate-Coenzyme A ligase, ADP-forming, beta subunit [Mus musculus]	450.8	0.93	0.36	0.892857	0.92	1	0.51	1.21951	0.03
NP_038699.2	superoxide dismutase 2, mitochondrial [Mus musculus]	355.19	0.87	0.23	0.961538	0.63	0.934579	0.82	1.31579	0	31980762	P09671	Molecular Function	GO:0008383	manganese superoxide dismutase activity
NP_038699.2	superoxide dismutase 2, mitochondrial [Mus musculus]	355.19	0.87	0.23	0.961538	0.63	0.934579	0.82	1.31579	0	31980762	P09671	Molecular Function	GO:0016491	oxidoreductase activity
NP_038699.2	superoxide dismutase 2, mitochondrial [Mus musculus]	355.19	0.87	0.23	0.961538	0.63	0.934579	0.82	1.31579	0	31980762	P09671	Molecular Function	GO:0030145	manganese ion binding
NP_038699.2	superoxide dismutase 2, mitochondrial [Mus musculus]	355.19	0.87	0.23	0.961538	0.63	0.934579	0.82	1.31579	0	31980762	P09671	Molecular Function	GO:0046872	metal ion binding
NP_038699.2	superoxide dismutase 2, mitochondrial [Mus musculus]	355.19	0.87	0.23	0.961538	0.63	0.934579	0.82	1.31579	0	31980762	P09671	Biological Process	GO:0000303	response to superoxide
NP_038699.2	superoxide dismutase 2, mitochondrial [Mus musculus]	355.19	0.87	0.23	0.961538	0.63	0.934579	0.82	1.31579	0	31980762	P09671	Biological Process	GO:0001315	age-dependent response to reactive oxygen species
NP_038699.2	superoxide dismutase 2, mitochondrial [Mus musculus]	355.19	0.87	0.23	0.961538	0.63	0.934579	0.82	1.31579	0	31980762	P09671	Biological Process	GO:0006357	regulation of transcription from RNA polymerase II promoter
NP_038699.2	superoxide dismutase 2, mitochondrial [Mus musculus]	355.19	0.87	0.23	0.961538	0.63	0.934579	0.82	1.31579	0	31980762	P09671	Biological Process	GO:0006801	superoxide metabolic process
NP_038699.2	superoxide dismutase 2, mitochondrial [Mus musculus]	355.19	0.87	0.23	0.961538	0.63	0.934579	0.82	1.31579	0	31980762	P09671	Cellular Location	GO:0005739	mitochondrion
NP_038699.2	superoxide dismutase 2, mitochondrial [Mus musculus]	355.19	0.87	0.23	0.961538	0.63	0.934579	0.82	1.31579	0	31980762	P09671	Cellular Location	GO:0005743	mitochondrial inner membrane
NP_077725.1	syntaxin 1B2 [Mus musculus]	208.84			1.88679	0.1					13259378	P61264	Molecular Function	GO:0008565	protein transporter activity
NP_077725.1	syntaxin 1B2 [Mus musculus]	208.84			1.88679	0.1					13259378	P61264	Biological Process	GO:0006836	neurotransmitter transport
NP_077725.1	syntaxin 1B2 [Mus musculus]	208.84			1.88679	0.1					13259378	P61264	Biological Process	GO:0006886	intracellular protein transport
NP_077725.1	syntaxin 1B2 [Mus musculus]	208.84			1.88679	0.1					13259378	P61264	Cellular Location	GO:0016020	membrane
NP_077725.1	syntaxin 1B2 [Mus musculus]	208.84			1.88679	0.1					13259378	P61264	Cellular Location	GO:0016021	integral to membrane
NP_033463.1	thiosulfate sulfurtransferase, mitochondrial [Mus musculus]	750.48	0.82	0.01	1.40845	0.03			0.934579	0.63
NP_766333.1	Tu translation elongation factor, mitochondrial [Mus musculus]	314.85	1.07	0.6	1.13636	0.12	0.892857	0.68	1.31579	0
NP_035783.1	tubulin, alpha 1 [Mus musculus]	1088.83			1.26582	0.04					6755901	P68369	Molecular Function	GO:0000166	nucleotide binding
NP_035783.1	tubulin, alpha 1 [Mus musculus]	1088.83			1.26582	0.04					6755901	P68369	Molecular Function	GO:0003924	GTPase activity
NP_035783.1	tubulin, alpha 1 [Mus musculus]	1088.83			1.26582	0.04					6755901	P68369	Molecular Function	GO:0005198	structural molecule activity
NP_035783.1	tubulin, alpha 1 [Mus musculus]	1088.83			1.26582	0.04					6755901	P68369	Molecular Function	GO:0005525	GTP binding
NP_035783.1	tubulin, alpha 1 [Mus musculus]	1088.83			1.26582	0.04					6755901	P68369	Biological Process	GO:0007018	microtubule-based movement
NP_035783.1	tubulin, alpha 1 [Mus musculus]	1088.83			1.26582	0.04					6755901	P68369	Biological Process	GO:0051258	protein polymerization
NP_035783.1	tubulin, alpha 1 [Mus musculus]	1088.83			1.26582	0.04					6755901	P68369	Cellular Location	GO:0005874	microtubule
NP_035783.1	tubulin, alpha 1 [Mus musculus]	1088.83			1.26582	0.04					6755901	P68369	Cellular Location	GO:0043234	protein complex
NP_035784.1	tubulin, alpha 2 [Mus musculus]	1051			1.20482	0.06
NP_033472.1	tubulin, alpha 3 [Mus musculus]	888.85			1.35135	0.03
NP_033473.1	tubulin, alpha 4 [Mus musculus]	901.21			1.2987	0.05
NP_033474.1	tubulin, alpha 6 [Mus musculus]	1025.93			1.31579	0.03
NP_033475.1	tubulin, alpha 7 [Mus musculus]	888.85			1.36986	0.03					6678471	P05214	Molecular Function	GO:0000166	nucleotide binding
NP_033475.1	tubulin, alpha 7 [Mus musculus]	888.85			1.36986	0.03					6678471	P05214	Molecular Function	GO:0003924	GTPase activity
NP_033475.1	tubulin, alpha 7 [Mus musculus]	888.85			1.36986	0.03					6678471	P05214	Molecular Function	GO:0005198	structural molecule activity
NP_033475.1	tubulin, alpha 7 [Mus musculus]	888.85			1.36986	0.03					6678471	P05214	Molecular Function	GO:0005525	GTP binding
NP_033475.1	tubulin, alpha 7 [Mus musculus]	888.85			1.36986	0.03					6678471	P05214	Biological Process	GO:0007018	microtubule-based movement
NP_033475.1	tubulin, alpha 7 [Mus musculus]	888.85			1.36986	0.03					6678471	P05214	Biological Process	GO:0051258	protein polymerization
NP_033475.1	tubulin, alpha 7 [Mus musculus]	888.85			1.36986	0.03					6678471	P05214	Cellular Location	GO:0005874	microtubule
NP_033475.1	tubulin, alpha 7 [Mus musculus]	888.85			1.36986	0.03					6678471	P05214	Cellular Location	GO:0043234	protein complex
NP_059075.1	tubulin, alpha 8 [Mus musculus]	679.52			1.42857	0.06
NP_076205.1	tubulin, beta [Mus musculus]	1083.65			1.26582	0.07					21746161	Q9CWF2	Molecular Function	GO:0000166	nucleotide binding
NP_076205.1	tubulin, beta [Mus musculus]	1083.65			1.26582	0.07					21746161	Q9CWF2	Molecular Function	GO:0003924	GTPase activity
NP_076205.1	tubulin, beta [Mus musculus]	1083.65			1.26582	0.07					21746161	Q9CWF2	Molecular Function	GO:0005198	structural molecule activity
NP_076205.1	tubulin, beta [Mus musculus]	1083.65			1.26582	0.07					21746161	Q9CWF2	Molecular Function	GO:0005525	GTP binding
NP_076205.1	tubulin, beta [Mus musculus]	1083.65			1.26582	0.07					21746161	Q9CWF2	Biological Process	GO:0007018	microtubule-based movement
NP_076205.1	tubulin, beta [Mus musculus]	1083.65			1.26582	0.07					21746161	Q9CWF2	Biological Process	GO:0051258	protein polymerization
NP_076205.1	tubulin, beta [Mus musculus]	1083.65			1.26582	0.07					21746161	Q9CWF2	Cellular Location	GO:0005737	cytoplasm
NP_076205.1	tubulin, beta [Mus musculus]	1083.65			1.26582	0.07					21746161	Q9CWF2	Cellular Location	GO:0005874	microtubule
NP_076205.1	tubulin, beta [Mus musculus]	1083.65			1.26582	0.07					21746161	Q9CWF2	Cellular Location	GO:0043234	protein complex
NP_033476.1	tubulin, beta 2 [Mus musculus]	1113.23			1.28205	0.05
NP_075768.1	tubulin, beta 3 [Mus musculus]	756.36			1.36986	0.08					12963615	Q9ERD7	Molecular Function	GO:0000166	nucleotide binding
NP_075768.1	tubulin, beta 3 [Mus musculus]	756.36			1.36986	0.08					12963615	Q9ERD7	Molecular Function	GO:0003924	GTPase activity
NP_075768.1	tubulin, beta 3 [Mus musculus]	756.36			1.36986	0.08					12963615	Q9ERD7	Molecular Function	GO:0005198	structural molecule activity
NP_075768.1	tubulin, beta 3 [Mus musculus]	756.36			1.36986	0.08					12963615	Q9ERD7	Molecular Function	GO:0005525	GTP binding
NP_075768.1	tubulin, beta 3 [Mus musculus]	756.36			1.36986	0.08					12963615	Q9ERD7	Biological Process	GO:0007018	microtubule-based movement
NP_075768.1	tubulin, beta 3 [Mus musculus]	756.36			1.36986	0.08					12963615	Q9ERD7	Biological Process	GO:0051258	protein polymerization
NP_075768.1	tubulin, beta 3 [Mus musculus]	756.36			1.36986	0.08					12963615	Q9ERD7	Cellular Location	GO:0005737	cytoplasm
NP_075768.1	tubulin, beta 3 [Mus musculus]	756.36			1.36986	0.08					12963615	Q9ERD7	Cellular Location	GO:0005739	mitochondrion
NP_075768.1	tubulin, beta 3 [Mus musculus]	756.36			1.36986	0.08					12963615	Q9ERD7	Cellular Location	GO:0005874	microtubule
NP_075768.1	tubulin, beta 3 [Mus musculus]	756.36			1.36986	0.08					12963615	Q9ERD7	Cellular Location	GO:0043234	protein complex
NP_033477.2	tubulin, beta 4 [Mus musculus]	730.06			1.17647	0.22					31981939	Q80Y54	Molecular Function	GO:0000166	nucleotide binding
NP_033477.2	tubulin, beta 4 [Mus musculus]	730.06			1.17647	0.22					31981939	Q80Y54	Molecular Function	GO:0003924	GTPase activity
NP_033477.2	tubulin, beta 4 [Mus musculus]	730.06			1.17647	0.22					31981939	Q80Y54	Molecular Function	GO:0005198	structural molecule activity
NP_033477.2	tubulin, beta 4 [Mus musculus]	730.06			1.17647	0.22					31981939	Q80Y54	Molecular Function	GO:0005525	GTP binding
NP_033477.2	tubulin, beta 4 [Mus musculus]	730.06			1.17647	0.22					31981939	Q80Y54	Biological Process	GO:0007018	microtubule-based movement
NP_033477.2	tubulin, beta 4 [Mus musculus]	730.06			1.17647	0.22					31981939	Q80Y54	Biological Process	GO:0051258	protein polymerization
NP_033477.2	tubulin, beta 4 [Mus musculus]	730.06			1.17647	0.22					31981939	Q80Y54	Cellular Location	GO:0005737	cytoplasm
NP_033477.2	tubulin, beta 4 [Mus musculus]	730.06			1.17647	0.22					31981939	Q80Y54	Cellular Location	GO:0005874	microtubule
NP_033477.2	tubulin, beta 4 [Mus musculus]	730.06			1.17647	0.22					31981939	Q80Y54	Cellular Location	GO:0005929	cilium
NP_033477.2	tubulin, beta 4 [Mus musculus]	730.06			1.17647	0.22					31981939	Q80Y54	Cellular Location	GO:0043234	protein complex
NP_035785.1	tubulin, beta 5 [Mus musculus]	1039.7			1.2987	0.06					7106439	P99024	Molecular Function	GO:0000166	nucleotide binding
NP_035785.1	tubulin, beta 5 [Mus musculus]	1039.7			1.2987	0.06					7106439	P99024	Molecular Function	GO:0003924	GTPase activity
NP_035785.1	tubulin, beta 5 [Mus musculus]	1039.7			1.2987	0.06					7106439	P99024	Molecular Function	GO:0005200	structural constituent of cytoskeleton
NP_035785.1	tubulin, beta 5 [Mus musculus]	1039.7			1.2987	0.06					7106439	P99024	Molecular Function	GO:0005525	GTP binding
NP_035785.1	tubulin, beta 5 [Mus musculus]	1039.7			1.2987	0.06					7106439	P99024	Molecular Function	GO:0042288	MHC class I protein binding
NP_035785.1	tubulin, beta 5 [Mus musculus]	1039.7			1.2987	0.06					7106439	P99024	Biological Process	GO:0007018	microtubule-based movement
NP_035785.1	tubulin, beta 5 [Mus musculus]	1039.7			1.2987	0.06					7106439	P99024	Biological Process	GO:0051227	mitotic spindle assembly
NP_035785.1	tubulin, beta 5 [Mus musculus]	1039.7			1.2987	0.06					7106439	P99024	Biological Process	GO:0051258	protein polymerization
NP_035785.1	tubulin, beta 5 [Mus musculus]	1039.7			1.2987	0.06					7106439	P99024	Cellular Location	GO:0005737	cytoplasm
NP_035785.1	tubulin, beta 5 [Mus musculus]	1039.7			1.2987	0.06					7106439	P99024	Cellular Location	GO:0045298	tubulin complex
NP_080749.2	tubulin, beta 6 [Mus musculus]	602.44			1.16279	0.29
NP_033562.2	tyrosine 3-monooxygenase/tryptophan 5-monooxygenase activation protein, epsilon polypeptide [Mus musculus]	482.59			0.980392	0.5					31981925	P62259	Molecular Function	GO:0019904	protein domain specific binding
NP_033562.2	tyrosine 3-monooxygenase/tryptophan 5-monooxygenase activation protein, epsilon polypeptide [Mus musculus]	482.59			0.980392	0.5					31981925	P62259	Biological Process	GO:0006605	protein targeting
NP_033562.2	tyrosine 3-monooxygenase/tryptophan 5-monooxygenase activation protein, epsilon polypeptide [Mus musculus]	482.59			0.980392	0.5					31981925	P62259	Biological Process	GO:0007242	intracellular signaling cascade
NP_035870.1	tyrosine 3-monooxygenase/tryptophan 5-monooxygenase activation protein, zeta polypeptide [Mus musculus]	620.71			1.11111	0.29					6756041	P63101	Molecular Function	GO:0008134	transcription factor binding
NP_035870.1	tyrosine 3-monooxygenase/tryptophan 5-monooxygenase activation protein, zeta polypeptide [Mus musculus]	620.71			1.11111	0.29					6756041	P63101	Molecular Function	GO:0019904	protein domain specific binding
NP_035870.1	tyrosine 3-monooxygenase/tryptophan 5-monooxygenase activation protein, zeta polypeptide [Mus musculus]	620.71			1.11111	0.29					6756041	P63101	Biological Process	GO:0006605	protein targeting
NP_035870.1	tyrosine 3-monooxygenase/tryptophan 5-monooxygenase activation protein, zeta polypeptide [Mus musculus]	620.71			1.11111	0.29					6756041	P63101	Cellular Location	GO:0005634	nucleus
NP_035870.1	tyrosine 3-monooxygenase/tryptophan 5-monooxygenase activation protein, zeta polypeptide [Mus musculus]	620.71			1.11111	0.29					6756041	P63101	Cellular Location	GO:0005739	mitochondrion
NP_063936.1	ubiquitin A-52 residue ribosomal protein fusion product 1 [Mus musculus]	203.71			0.990099	0.53
NP_035794.1	ubiquitin B [Mus musculus]	258.81			1	0.53					6755919	Q6NZC5	Biological Process	GO:0006464	protein modification
NP_035794.1	ubiquitin B [Mus musculus]	258.81			1	0.53					6755919	Q6NZC5	Cellular Location	GO:0005634	nucleus
NP_062613.2	ubiquitin C [Mus musculus]	471.4			0.990099	0.47					21070950	NP_062613	Biological Process	GO:0006464	protein modification

## Sheet: GO Pathways Akita Matrix
Accession	Description	Diabetic:WT (Liver)	p value (significant <0.05 or >0.95)	Diabetic:WT (Brain)	p value (significant <0.05 or >0.95)	Diabetic:WT (Heart)	p value (significant <0.05 or >0.95)	Diabetic:WT (Kidney)	p value (significant <0.05 or >0.95)	Related Pathway	Related Pathway	Related Pathway	Related Pathway	Related Pathway	Related Pathway	Related Pathway	Related Pathway	Related Pathway	Related Pathway
NP_032282.2	3-hydroxy-3-methylglutaryl-Coenzyme A synthase 2 [Mus musculus]	1.01	0.54							Butanoate metabolism	Synthesis and degradation of ketone bodies	Valine, leucine and isoleucine degradation
NP_666342.1	3-ketoacyl-CoA thiolase B [Mus musculus]	0.68	0					0.769231	0.95	Benzoate degradation via CoA ligation	Butanoate metabolism	Fatty acid metabolism	Lysine degradation	Propanoate metabolism	Pyruvate metabolism	Tryptophan metabolism	Two-component system - General	Valine, leucine and isoleucine degradation
NP_061359.2	3-monooxgenase/tryptophan 5-monooxygenase activation protein, gamma polypeptide [Mus musculus]			0.990099	0.56					Cell cycle
NP_077150.1	3-oxoacid CoA transferase 1 [Mus musculus]			1.14943	0.05	0.884956	0.92	1.19048	0	Butanoate metabolism	Synthesis and degradation of ketone bodies	Valine, leucine and isoleucine degradation
NP_766549.2	4-aminobutyrate aminotransferase [Mus musculus]	1.04	0.63	1.11111	0.02			1.0989	0.19	Alanine and aspartate metabolism	Butanoate metabolism	Glutamate metabolism	Propanoate metabolism	Valine, leucine and isoleucine degradation	beta-Alanine metabolism
NP_659033.1	acetyl-Coenzyme A acetyltransferase 1 precursor [Mus musculus]	0.69	0	0.925926	0.82	0.980392	0.55	0.769231	1	Benzoate degradation via CoA ligation	Butanoate metabolism	Fatty acid metabolism	Lysine degradation	Propanoate metabolism	Pyruvate metabolism	Tryptophan metabolism	Two-component system - General	Valine, leucine and isoleucine degradation
NP_570934.1	acetyl-Coenzyme A acyltransferase 1 [Mus musculus]	0.68	0					0.763359	0.96	Benzoate degradation via CoA ligation	Butanoate metabolism	Fatty acid metabolism	Lysine degradation	Propanoate metabolism	Pyruvate metabolism	Tryptophan metabolism	Two-component system - General	Valine, leucine and isoleucine degradation
NP_803421.1	acetyl-Coenzyme A acyltransferase 2 (mitochondrial 3-oxoacyl-Coenzyme A thiolase) [Mus musculus]	0.75	0	1.26582	0.02	1.40845	0	1.69492	0	Benzoate degradation via CoA ligation	Butanoate metabolism	Fatty acid metabolism	Lysine degradation	Propanoate metabolism	Pyruvate metabolism	Tryptophan metabolism	Two-component system - General	Valine, leucine and isoleucine degradation
NP_031407.2	acetyl-Coenzyme A dehydrogenase, long-chain [Mus musculus]	0.89	0.13	1.25	0.03	1.13636	0	1.17647	0.01	1- and 2-Methylnaphthalene degradation	Bile acid biosynthesis	Fatty acid metabolism	Geraniol degradation	PPAR signaling pathway	Propanoate metabolism	Valine, leucine and isoleucine degradation	beta-Alanine metabolism
NP_031408.1	acetyl-Coenzyme A dehydrogenase, medium chain [Mus musculus]	0.96	0.36	1.1236	0.33	1.03093	0.25	0.943396	0.91	1- and 2-Methylnaphthalene degradation	Bile acid biosynthesis	Fatty acid metabolism	Geraniol degradation	PPAR signaling pathway	Propanoate metabolism	Valine, leucine and isoleucine degradation	beta-Alanine metabolism
NP_542364.1	aconitase 2, mitochondrial [Mus musculus]	1.07	0.87	1	0.53	0.961538	0.93	1.31579	0	Citrate cycle (TCA cycle)	Glyoxylate and dicarboxylate metabolism	Reductive carboxylate cycle (CO2 fixation)
NP_666309.1	acyl-CoA synthetase medium-chain family member 2 [Mus musculus]							0.925926	1	None
NP_031409.2	acyl-Coenzyme A dehydrogenase, short chain [Mus musculus]	0.76	0	1.44928	0.24	1.11111	0.18	1.03093	0.33	1- and 2-Methylnaphthalene degradation	Bile acid biosynthesis	Fatty acid metabolism	Geraniol degradation	PPAR signaling pathway	Propanoate metabolism	Valine, leucine and isoleucine degradation	beta-Alanine metabolism
NP_059062.1	acyl-Coenzyme A dehydrogenase, very long chain [Mus musculus]					1.03093	0.5			None
NP_056544.2	acyl-Coenzyme A oxidase 1, palmitoyl [Mus musculus]	0.7	0					0.571429	1	Fatty acid metabolism	Polyunsaturated fatty acid biosynthesis	alpha-Linolenic acid metabolism
NP_444345.1	acyl-Coenzyme A oxidase 2, branched chain [Mus musculus]	1.03	0.58					0.719424	0.93	Fatty acid metabolism	Polyunsaturated fatty acid biosynthesis	alpha-Linolenic acid metabolism
NP_109646.2	acyl-Coenzyme A oxidase 3, pristanoyl [Mus musculus]							0.617284	0.98	Fatty acid metabolism	Polyunsaturated fatty acid biosynthesis	alpha-Linolenic acid metabolism
NP_067274.1	adenylate kinase 3 [Mus musculus]	0.92	0.34	1.19048	0.17	0.917431	0.61	1.38889	0	Cholera - Infection	Purine metabolism
NP_057911.1	alanine-glyoxylate aminotransferase [Mus musculus]	1.09	0.68							NL
NP_033786.1	aldehyde dehydrogenase 2, mitochondrial [Mus musculus]	0.76	0	0.970874	0.59	0.833333	0.91	1.19048	0	3-Chloroacrylic acid degradation	Ascorbate and aldarate metabolism	Butanoate metabolism	Fatty acid metabolism	Histidine metabolism	Lysine degradation	Propanoate metabolism	Urea cycle and metabolism of amino groups	Valine, leucine and isoleucine degradation	beta-Alanine metabolism
NP_598803.1	aldehyde dehydrogenase family 6, subfamily A1 [Mus musculus]	0.9	0.06	1.14943	0.14	0.943396	0.65	0.990099	0.53	3-Chloroacrylic acid degradation	Ascorbate and aldarate metabolism	Butanoate metabolism	Fatty acid metabolism	Histidine metabolism	Lysine degradation	Propanoate metabolism	Urea cycle and metabolism of amino groups	Valine, leucine and isoleucine degradation	beta-Alanine metabolism
NP_613066.1	aldehyde dehydrogenase family 7, member A1 [Mus musculus]	0.99	0.45	1.20482	0.19			1.16279	0.06	3-Chloroacrylic acid degradation	Ascorbate and aldarate metabolism	Butanoate metabolism	Fatty acid metabolism	Histidine metabolism	Lysine degradation	Propanoate metabolism	Urea cycle and metabolism of amino groups	Valine, leucine and isoleucine degradation	beta-Alanine metabolism
NP_067448.1	aldo-keto reductase family 1, member A4 (aldehyde reductase) [Mus musculus]							1.42857	0.06	Caprolactam degradation	Glycerolipid metabolism	Glycolysis / Gluconeogenesis	Tetrachloroethene degradation
NP_031464.1	aldolase 1, A isoform [Mus musculus]			1	0.49					Carbon fixation	Fructose and mannose metabolism	Glycolysis / Gluconeogenesis	Pentose phosphate pathway
NP_033787.2	aldolase 3, C isoform [Mus musculus]			1.13636	0.27					Carbon fixation	Fructose and mannose metabolism	Glycolysis / Gluconeogenesis	Pentose phosphate pathway
NP_038958.2	aminoadipate-semialdehyde synthase precursor [Mus musculus]	1.73	1					1.1236	0.08	Lysine biosynthesis	Lysine degradation
NP_080788.1	biphenyl hydrolase-like (serine hydrolase, breast epithelial mucin-associated antigen) [Mus musculus]	0.77	0.04	1.06383	0.41			0.943396	0.75	None
NP_033867.1	branched chain aminotransferase 2, mitochondrial [Mus musculus]					0.862069	0.75	1.51515	0.03	Pantothenate and CoA biosynthesis	Valine, leucine and isoleucine biosynthesis	Valine, leucine and isoleucine degradation
NP_473435.1	butyryl Coenzyme A synthetase 1 [Mus musculus]	0.7	0					1.2987	0	None
NP_076222.1	carnitine O-octanoyltransferase [Mus musculus]	0.7	0.1					0.675676	1	Adipocytokine signaling pathway	Alanine and aspartate metabolism	Fatty acid metabolism	Glycerophospholipid metabolism	PPAR signaling pathway
NP_033934.1	catalase [Mus musculus]	0.73	0					0.632911	1	NL
NP_031824.1	cathepsin B preproprotein [Mus musculus]			Diabetic only						Antigen processing and presentation
NP_080720.1	citrate synthase [Mus musculus]	0.93	0.39	0.970874	0.74	0.862069	1	1.25	0.03	Citrate cycle (TCA cycle)	Glyoxylate and dicarboxylate metabolism
NP_082221.1	citrate synthase-like protein [Mus musculus]	0.69	0.15	1.06383	0.23	0.900901	0.88	1.36986	0.02	Citrate cycle (TCA cycle)	Glyoxylate and dicarboxylate metabolism
NP_001003908.1	clathrin, heavy polypeptide (Hc) [Mus musculus]			1.07527	0.33					Huntington's disease
NP_031791.3	collapsin response mediator protein 1 [Mus musculus]			1.26582	0.23					Purine metabolism
NP_067248.1	creatine kinase, brain [Mus musculus]			1.19048	0.1					Arginine and proline metabolism
NP_031887.2	dihydrolipoamide dehydrogenase [Mus musculus]	0.86	0.24	0.990099	0.57	0.840336	0.95	1.20482	0.02	Alanine and aspartate metabolism	Citrate cycle (TCA cycle)	Glycine, serine and threonine metabolism	Glycolysis / Gluconeogenesis	Pyruvate metabolism	Valine, leucine and isoleucine degradation
NP_663589.2	dihydrolipoamide S-acetyltransferase (E2 component of pyruvate dehydrogenase complex) [Mus musculus]			0.934579	0.76	0.990099	0.5	1.08696	0.41	Alanine and aspartate metabolism	Citrate cycle (TCA cycle)	Glycolysis / Gluconeogenesis	Lysine degradation	Pyruvate metabolism
NP_034085.2	dihydropyrimidinase-like 2 [Mus musculus]			1.19048	0.16					Purine metabolism
NP_083048.1	dimethylglycine dehydrogenase precursor [Mus musculus]	0.91	0.09					1.13636	0.23	Glycine, serine and threonine metabolism	Nitrogen metabolism	One carbon pool by folate
NP_081846.3	D-lactate dehydrogenase [Mus musculus]	0.79	0.09					0.657895	1	Glyoxylate and dicarboxylate metabolism	Pyruvate metabolism
NP_034153.2	dodecenoyl-Coenzyme A delta isomerase (3,2 trans-enoyl-Coenyme A isomerase) [Mus musculus]	0.83	0.05	1.13636	0.27	1.11111	0.18	1.31579	0.04	Benzoate degradation via CoA ligation	Butanoate metabolism	Caprolactam degradation	Fatty acid metabolism	Geraniol degradation	Lysine degradation	Propanoate metabolism	Valine, leucine and isoleucine degradation	beta-Alanine metabolism
NP_663590.2	electron transferring flavoprotein, alpha polypeptide [Mus musculus]	0.85	0.02	1.14943	0.12	1	0.46	1.06383	0.18	None
NP_080971.2	electron transferring flavoprotein, beta polypeptide [Mus musculus]	0.84	0.01	1.07527	0.35	1.05263	0.14	1.03093	0.31	None
NP_075608.1	enolase 1, alpha non-neuron [Mus musculus]			1.11111	0.28					NL
NP_038537.1	enolase 2, gamma neuronal [Mus musculus]			1.14943	0.29					Glycolysis / Gluconeogenesis
NP_031959.1	enolase 3, beta muscle [Mus musculus]			0.555556	0.93					Glycolysis / Gluconeogenesis
NP_058052.1	enoyl coenzyme A hydratase 1, peroxisomal [Mus musculus]					1.5625	0			DN
NP_444349.1	enoyl Coenzyme A hydratase, short chain, 1, mitochondrial [Mus musculus]	1.05	0.56	1	0.5	0.943396	0.69	1.0101	0.46	Benzoate degradation via CoA ligation	Butanoate metabolism	Caprolactam degradation	Geraniol degradation	Lysine degradation	Propanoate metabolism	Valine, leucine and isoleucine degradation	beta-Alanine metabolism
NP_031966.2	epoxide hydrolase 2, cytoplasmic [Mus musculus]	0.83	0.07					0.735294	0.99	None
NP_034339.1	fumarate hydratase 1 [Mus musculus]	1.02	0.6	1.04167	0.39	0.900901	0.89	1.07527	0.29	Alanine and aspartate metabolism	Nitrogen metabolism
NP_032159.1	glutamate dehydrogenase 1 [Mus musculus]	0.7	0	1.26582	0	0.757576	0.75	1.63934	0	Arginine and proline metabolism	Glutamate metabolism	Nitrogen metabolism
NP_034455.1	glutamate oxaloacetate transaminase 2, mitochondrial [Mus musculus]	0.76	0	0.689655	1	1.25	0	1.53846	0	DN
NP_776291.1	glutamic pyruvate transaminase (alanine aminotransferase) 2 [Mus musculus]	1.3	0.84							Alanine and aspartate metabolism	Carbon fixation	Glutamate metabolism
NP_032157.2	glutamine synthetase [Mus musculus]			1.1236	0.3					Glutamate metabolism	Nitrogen metabolism	Peptidoglycan biosynthesis
NP_032123.1	glutaryl-Coenzyme A dehydrogenase [Mus musculus]	0.95	0.38					1	0.48	NL
NP_032186.2	glutathione peroxidase 1 [Mus musculus]	1.03	0.57					1.28205	0.01	Arachidonic acid metabolism	Glutathione metabolism
NP_034488.1	glutathione S-transferase, mu 1 [Mus musculus]			1.06383	0.45					Glutathione metabolism	Metabolism of xenobiotics by cytochrome P450
NP_032209.1	glutathione S-transferase, mu 2 [Mus musculus]			1.16279	0.4					Glutathione metabolism	Metabolism of xenobiotics by cytochrome P450
NP_081040.1	glutathione S-transferase, mu 4 [Mus musculus]			1.42857	0.32					Glutathione metabolism	Metabolism of xenobiotics by cytochrome P450
NP_666047.1	glycine-N-acyltransferase [Mus musculus]	0.89	0.19					1.1236	0.06	None
NP_525028.1	glyoxylate reductase/hydroxypyruvate reductase [Mus musculus]							1.31579	0.29	Chronic myeloid leukemia	Notch signaling pathway	Wnt signaling pathway
NP_032329.1	heat shock protein 1 (chaperonin 10) [Mus musculus]	0.82	0.03	0.833333	1	0.980392	0.55	0.970874	0.68	None
NP_001002012.1	heat shock protein 2 [Mus musculus]			1.02041	0.48					Antigen processing and presentation	Chronic myeloid leukemia	Neurodegenerative Diseases	Prion disease
NP_032327.2	heat shock protein 2 [Mus musculus]			1.0989	0.34					Antigen processing and presentation	Chronic myeloid leukemia	Neurodegenerative Diseases	Prion disease
NP_112442.2	heat shock protein 8 [Mus musculus]			1.07527	0.35					Antigen processing and presentation	Chronic myeloid leukemia	Neurodegenerative Diseases	Prion disease
NP_034611.1	heat shock protein 9A [Mus musculus]	0.94	0.25	0.980392	0.59	0.943396	0.67	1.14943	0.03	None
NP_034568.1	hexokinase 1 [Mus musculus]			0.869565	0.84					Aminosugars metabolism	Fructose and mannose metabolism	Galactose metabolism	Glycolysis / Gluconeogenesis	Starch and sucrose metabolism	Streptomycin biosynthesis
NP_062418.2	hydroxyacid oxidase (glycolate oxidase) 3 [Mus musculus]							1.26582	0.13	Glyoxylate and dicarboxylate metabolism	Pyruvate metabolism
NP_058043.3	hydroxyacyl-Coenzyme A dehydrogenase type II [Mus musculus]	0.88	0.21	1.19048	0.21	1.07527	0.39	1.0989	0.39	1,1,1-Trichloro-2,2-bis(4-chlorophenyl)ethane (DDT) degradation	Biosynthesis of type II polyketide backbone	Butanoate metabolism	Carotenoid biosynthesis - General	Carotenoid biosynthesis - Organism group-specific	Fluorene degradation	Propanoate metabolism	Synthesis and degradation of ketone bodies	Tryptophan metabolism
NP_849209.1	hydroxyacyl-Coenzyme A dehydrogenase/3-ketoacyl-Coenzyme A thiolase/enoyl-Coenzyme A hydratase (trifunctional protein), alpha subunit [Mus musculus]	1.16	0.85	1.33333	0.07	1.20482	0.04	1.51515	0.01	Benzoate degradation via CoA ligation	Butanoate metabolism	Caprolactam degradation	Fatty acid elongation in mitochondria	Fatty acid metabolism	Lysine degradation	Polyunsaturated fatty acid biosynthesis	Propanoate metabolism	Valine, leucine and isoleucine degradation	beta-Alanine metabolism
NP_619595.2	hypothetical protein LOC192136 [Mus musculus]							WT only		1- and 2-Methylnaphthalene degradation	Geraniol degradation
NP_663423.2	hypothetical protein LOC217830 [Mus musculus]							1.44928	0.02	None
NP_001013784.1	hypothetical protein LOC240549 [Mus musculus]	0.9	0.34							None
NP_722502.1	hypothetical protein LOC264895 [Mus musculus]	0.94	0.27	1.21951	0.18					Butanoate metabolism	Phenylpropanoid biosynthesis	alpha-Linolenic acid metabolism
NP_001020559.1	hypothetical protein LOC433182 [Mus musculus]			1.14943	0.21					Glycolysis / Gluconeogenesis
NP_083826.1	hypothetical protein LOC64697 [Mus musculus]	WT only						0.934579	0.84	-
NP_080428.1	hypothetical protein LOC67432 [Mus musculus]	0.82	0.12					1.17647	0.14	-
NP_766599.1	isocitrate dehydrogenase 2 (NADP+), mitochondrial [Mus musculus]	1.17	0.9	1.0989	0.21	1.11111	0	1.26582	0	Citrate cycle (TCA cycle)	Glutathione metabolism	Reductive carboxylate cycle (CO2 fixation)
NP_083849.1	isocitrate dehydrogenase 3 (NAD+) alpha [Mus musculus]			0.869565	1	0.884956	0.97	1.51515	0	Citrate cycle (TCA cycle)	Glutathione metabolism	Reductive carboxylate cycle (CO2 fixation)
NP_570954.1	isocitrate dehydrogenase 3, beta subunit [Mus musculus]			1.02041	0.45	1.20482	0.14	1.14943	0.25	Citrate cycle (TCA cycle)	Glutathione metabolism	Reductive carboxylate cycle (CO2 fixation)
NP_062800.1	isovaleryl coenzyme A dehydrogenase [Mus musculus]	0.78	0.03	1.05263	0.33	0.746269	0.99	0.840336	0.97	1- and 2-Methylnaphthalene degradation	Bile acid biosynthesis	Fatty acid metabolism	Geraniol degradation	PPAR signaling pathway	Propanoate metabolism	Valine, leucine and isoleucine degradation	beta-Alanine metabolism
NP_076226.2	L-specific multifunctional beta-oxdiation protein [Mus musculus]	0.65	0					0.406504	1	DN
NP_032643.2	malate dehydrogenase 2, NAD (mitochondrial) [Mus musculus]	0.91	0.11	0.970874	0.86	0.763359	1	1.2987	0	Cysteine metabolism	Glycolysis / Gluconeogenesis	Propanoate metabolism	Pyruvate metabolism
NP_663469.1	malic enzyme 2, NAD(+)-dependent, mitochondrial [Mus musculus]			0.917431	0.7					Pyruvate metabolism
NP_062708.1	N-acylsphingosine amidohydrolase (acid ceramidase) 1 [Mus musculus]			0.925926	0.61					Caprolactam degradation	Sphingolipid metabolism
NP_149071.1	nudix (nucleoside diphosphate linked moiety X)-type motif 19 [Mus musculus]							0.497512	1	NL
NP_077757.1	nudix (nucleoside diphosphate linked moiety X)-type motif 7 isoform 1 [Mus musculus]	0.43	0							NL
NP_077766.2	nudix (nucleoside diphosphate linked moiety X)-type motif 7 isoform 2 [Mus musculus]	0.44	0							NL
NP_032795.1	ornithine transcarbamylase [Mus musculus]	0.79	0							Arginine and proline metabolism	Urea cycle and metabolism of amino groups
NP_032933.1	peptidylprolyl isomerase A [Mus musculus]			1.19048	0.15					None
NP_031478.1	peroxiredoxin 3 [Mus musculus]	0.93	0.38	1.04167	0.33	0.943396	0.68	1.17647	0.13	Alkaloid biosynthesis II	Butanoate metabolism	Methane metabolism	Phenylalanine metabolism	Phenylpropanoid biosynthesis
NP_036151.1	peroxiredoxin 5 precursor [Mus musculus]	0.87	0.25	0.925926	0.92	0.970874	0.66	1.0101	0.44	None
NP_076012.2	peroxisomal trans 2-enoyl CoA reductase [Mus musculus]	1.11	0.68					0.689655	1	None
NP_075907.1	phosphoglycerate mutase 1 [Mus musculus]			Diabetic only						NL
XP_985387.1	PREDICTED: agmatine ureohydrolase (agmatinase) [Mus musculus]	1.04	0.52							NL
XP_129769.6	PREDICTED: carbamoyl-phosphate synthetase 1 isoform 1 [Mus musculus]	1.06	1							NL
XP_906671.1	PREDICTED: carbamoyl-phosphate synthetase 1 isoform 2 [Mus musculus]	1.02	0.78							NL
XP_905264.1	PREDICTED: glutaminase isoform 3 [Mus musculus]			0.884956	0.64					NL
XP_905269.1	PREDICTED: glutaminase isoform 4 [Mus musculus]			0.900901	0.74					NL
XP_905359.1	PREDICTED: glutathione S-transferase, mu 7 isoform 4 [Mus musculus]			1.47059	0.19					NL
XP_905367.1	PREDICTED: glutathione S-transferase, mu 7 isoform 5 [Mus musculus]			1.49254	0.26					NL
XP_488540.2	PREDICTED: hypothetical protein LOC338350 isoform 1 [Mus musculus]					1.14943	0.34	0.925926	0.64	None
XP_904660.1	PREDICTED: hypothetical protein LOC338350 isoform 2 [Mus musculus]					1.19048	0.31	0.943396	0.6	NL
XP_898273.1	PREDICTED: similar to 10 kDa heat shock protein, mitochondrial (Hsp10) (10 kDa chaperonin) (CPN10) [Mus musculus]	0.84	0.05	0.854701	0.98	1.02041	0.37	0.980392	0.69	None
XP_984323.1	PREDICTED: similar to 3-hydroxy-3-methylglutaryl-Coenzyme A synthase 2 [Mus musculus]	1.01	0.56							NL
XP_001000566.1	PREDICTED: similar to acyl-Coenzyme A dehydrogenase family, member 10 isoform 1 [Mus musculus]					1.11111	0.4	0.925926	0.64	NL
XP_001000582.1	PREDICTED: similar to acyl-Coenzyme A dehydrogenase family, member 10 isoform 2 [Mus musculus]					1.14943	0.37	0.934579	0.63	NL
XP_001000598.1	PREDICTED: similar to acyl-Coenzyme A dehydrogenase family, member 10 isoform 3 [Mus musculus]					0.934579	0.62	1	0.53	NL
XP_921248.1	PREDICTED: similar to acyl-Coenzyme A dehydrogenase family, member 10 isoform 4 [Mus musculus]					1.08696	0.27	0.934579	0.64	None
XP_929217.1	PREDICTED: similar to acyl-Coenzyme A dehydrogenase family, member 10 isoform 5 [Mus musculus]					1.1236	0.44	0.970874	0.58	NL
XP_920494.1	PREDICTED: similar to agmatine ureohydrolase (agmatinase) [Mus musculus]	1.07	0.59							NL
XP_979694.1	PREDICTED: similar to aldo-keto reductase family 1, member A4 (aldehyde reductase) [Mus musculus]							1.53846	0.04	NL
XP_923115.2	PREDICTED: similar to Aspartate aminotransferase, mitochondrial precursor (Transaminase A) (Glutamate oxaloacetate transaminase 2) [Mus musculus]	0.78	0	0.689655	1	1.19048	0.03	1.5873	0	NL
XP_986046.1	PREDICTED: similar to butyryl Coenzyme A synthetase 1 [Mus musculus]	0.73	0					1.26582	0	NL
XP_998540.1	PREDICTED: similar to Carbamoyl-phosphate synthase [ammonia], mitochondrial precursor (Carbamoyl-phosphate synthetase I) (CPSase I) isoform 1 [Mus musculus]	1.04	0.82							NL
XP_998560.1	PREDICTED: similar to Carbamoyl-phosphate synthase [ammonia], mitochondrial precursor (Carbamoyl-phosphate synthetase I) (CPSase I) isoform 2 [Mus musculus]	1.06	1							NL
XP_917169.1	PREDICTED: similar to Carbamoyl-phosphate synthase [ammonia], mitochondrial precursor (Carbamoyl-phosphate synthetase I) (CPSase I) isoform 4 [Mus musculus]	1.06	1							NL
XP_991941.1	PREDICTED: similar to Carbamoyl-phosphate synthase [ammonia], mitochondrial precursor (Carbamoyl-phosphate synthetase I) (CPSase I) isoform 5 [Mus musculus]	1.06	0.99							NL
XP_914990.2	PREDICTED: similar to Electron transfer flavoprotein beta-subunit (Beta-ETF) [Mus musculus]	0.85	0.12	1.19048	0.18	1.08696	0.15	1.0101	0.46	None
XP_001003118.1	PREDICTED: similar to electron transferring flavoprotein, beta polypeptide [Mus musculus]	0.86	0.04	1.0101	0.43	1.05263	0.11	1.05263	0.21	NL
XP_001006583.1	PREDICTED: similar to enolase 1, alpha non-neuron [Mus musculus]			1.19048	0.34					NL
XP_992848.1	PREDICTED: similar to Glutamate dehydrogenase 1, mitochondrial precursor (GDH) isoform 2 [Mus musculus]	0.73	0	1.26582	0	0.8	0.7	1.63934	0	NL
XP_989835.1	PREDICTED: similar to Glutaminase kidney isoform, mitochondrial precursor (GLS) (L-glutamine amidohydrolase) (K-glutaminase) isoform 1 [Mus musculus]			0.892857	0.59					NL
XP_990037.1	PREDICTED: similar to Glutaminase kidney isoform, mitochondrial precursor (GLS) (L-glutamine amidohydrolase) (K-glutaminase) isoform 3 [Mus musculus]			0.925926	0.72					NL
XP_896015.1	PREDICTED: similar to Glutathione S-transferase Mu 2 (GST class-mu 2) (Glutathione S-transferase pmGT2) (GST 5-5) [Mus musculus]			1.1236	0.4					None
XP_993199.1	PREDICTED: similar to Glutathione S-transferase Yb-3 (Chain 4) (GST Yb3) (GST class-mu 3) isoform 1 [Mus musculus]			1.08696	0.37					NL
XP_927955.1	PREDICTED: similar to Glutathione S-transferase Yb-3 (Chain 4) (GST Yb3) (GST class-mu 3) isoform 11 [Mus musculus]			1.63934	0.2					NL
XP_927960.1	PREDICTED: similar to Glutathione S-transferase Yb-3 (Chain 4) (GST Yb3) (GST class-mu 3) isoform 12 [Mus musculus]			1.28205	0.3					NL
XP_359308.2	PREDICTED: similar to Glutathione S-transferase Yb-3 (Chain 4) (GST Yb3) (GST class-mu 3) isoform 2 [Mus musculus]			1.42857	0.3					NL
XP_993269.1	PREDICTED: similar to Glutathione S-transferase Yb-3 (Chain 4) (GST Yb3) (GST class-mu 3) isoform 3 [Mus musculus]			1.42857	0.31					NL
XP_993305.1	PREDICTED: similar to Glutathione S-transferase Yb-3 (Chain 4) (GST Yb3) (GST class-mu 3) isoform 4 [Mus musculus]			1.51515	0.24					NL
XP_993337.1	PREDICTED: similar to Glutathione S-transferase Yb-3 (Chain 4) (GST Yb3) (GST class-mu 3) isoform 5 [Mus musculus]			1.31579	0.32					NL
XP_908764.2	PREDICTED: similar to Glutathione S-transferase Yb-3 (Chain 4) (GST Yb3) (GST class-mu 3) isoform 6 [Mus musculus]			1.17647	0.4					NL
XP_908949.1	PREDICTED: similar to Glutathione S-transferase Yb-3 (Chain 4) (GST Yb3) (GST class-mu 3) isoform 8 [Mus musculus]			1.36986	0.28					NL
XP_998701.1	PREDICTED: similar to Glutathione S-transferase Yb-3 (Chain 4) (GST Yb3) (GST class-mu 3) isoform 9 [Mus musculus]			1.23457	0.35					NL
XP_001002772.1	PREDICTED: similar to Glyceraldehyde-3-phosphate dehydrogenase (GAPDH) [Mus musculus]			1.25	0.23					None
XP_992026.1	PREDICTED: similar to heat shock protein 8 [Mus musculus]			1.17647	0.23					NL
XP_984258.1	PREDICTED: similar to hexokinase 1 isoform 8 [Mus musculus]			0.877193	0.79					NL
XP_983987.1	PREDICTED: similar to hexokinase 1 isoform HKI-R isoform 1 [Mus musculus]			1.08696	0.41					NL
XP_984038.1	PREDICTED: similar to Hexokinase-1 (Hexokinase type I) (HK I) (Brain form hexokinase) isoform 2 [Mus musculus]			0.826446	0.85					NL
XP_984334.1	PREDICTED: similar to Hexokinase-1 (Hexokinase type I) (HK I) (Hexokinase, tumor isozyme) isoform 10 [Mus musculus]			0.862069	0.9					NL
XP_984381.1	PREDICTED: similar to Hexokinase-1 (Hexokinase type I) (HK I) (Hexokinase, tumor isozyme) isoform 11 [Mus musculus]			0.869565	0.85					NL
XP_984070.1	PREDICTED: similar to Hexokinase-1 (Hexokinase type I) (HK I) (Hexokinase, tumor isozyme) isoform 3 [Mus musculus]			0.840336	0.89					NL
XP_984107.1	PREDICTED: similar to Hexokinase-1 (Hexokinase type I) (HK I) (Hexokinase, tumor isozyme) isoform 4 [Mus musculus]			0.869565	0.84					NL
XP_984146.1	PREDICTED: similar to Hexokinase-1 (Hexokinase type I) (HK I) (Hexokinase, tumor isozyme) isoform 5 [Mus musculus]			0.862069	0.88					NL
XP_984188.1	PREDICTED: similar to Hexokinase-1 (Hexokinase type I) (HK I) (Hexokinase, tumor isozyme) isoform 6 [Mus musculus]			0.862069	0.9					NL
XP_984217.1	PREDICTED: similar to Hexokinase-1 (Hexokinase type I) (HK I) (Hexokinase, tumor isozyme) isoform 7 [Mus musculus]			0.877193	0.81					NL
XP_984296.1	PREDICTED: similar to Hexokinase-1 (Hexokinase type I) (HK I) (Hexokinase, tumor isozyme) isoform 9 [Mus musculus]			0.900901	0.74					NL
XP_916910.2	PREDICTED: similar to isochorismatase domain containing 2 [Mus musculus]	0.79	0.09	1.03093	0.49	1.1236	0.38	1.26582	0.02	NL
XP_999777.1	PREDICTED: similar to Phosphoglycerate mutase 1 (Phosphoglycerate mutase isozyme B) (PGAM-B) (BPG-dependent PGAM 1) [Mus musculus]			1.17647	0.35					NL
XP_979732.1	PREDICTED: similar to polyubiquitin [Mus musculus]			0.990099	0.54					NL
XP_001001919.1	PREDICTED: similar to polyubiquitin isoform 3 [Mus musculus]			0.980392	0.46					NL
XP_984703.1	PREDICTED: similar to Pyruvate kinase isozyme M2 isoform 3 [Mus musculus]			1.14943	0.31					NL
XP_984927.1	PREDICTED: similar to Pyruvate kinase isozymes M1/M2 (Pyruvate kinase muscle isozyme) isoform 10 [Mus musculus]			1.05263	0.45					NL
XP_984957.1	PREDICTED: similar to Pyruvate kinase isozymes M1/M2 (Pyruvate kinase muscle isozyme) isoform 11 [Mus musculus]			1.05263	0.39					NL
XP_984670.1	PREDICTED: similar to Pyruvate kinase isozymes M1/M2 (Pyruvate kinase muscle isozyme) isoform 2 [Mus musculus]			1.04167	0.42					NL
XP_984746.1	PREDICTED: similar to Pyruvate kinase isozymes M1/M2 (Pyruvate kinase muscle isozyme) isoform 4 [Mus musculus]			1.03093	0.47					NL
XP_984779.1	PREDICTED: similar to Pyruvate kinase isozymes M1/M2 (Pyruvate kinase muscle isozyme) isoform 5 [Mus musculus]			1.03093	0.39					NL
XP_984819.1	PREDICTED: similar to Pyruvate kinase isozymes M1/M2 (Pyruvate kinase muscle isozyme) isoform 6 [Mus musculus]			1	0.5					NL
XP_984847.1	PREDICTED: similar to Pyruvate kinase isozymes M1/M2 (Pyruvate kinase muscle isozyme) isoform 7 [Mus musculus]			1.06383	0.37					NL
XP_984873.1	PREDICTED: similar to Pyruvate kinase isozymes M1/M2 (Pyruvate kinase muscle isozyme) isoform 8 [Mus musculus]			1.1236	0.25					NL
XP_984899.1	PREDICTED: similar to Pyruvate kinase isozymes M1/M2 (Pyruvate kinase muscle isozyme) isoform 9 [Mus musculus]			1.0101	0.45					NL
XP_997685.1	PREDICTED: similar to ribosomal protein S27a [Mus musculus]			0.990099	0.5					NL
XP_930453.1	PREDICTED: similar to ribosomal protein S27a isoform 2 [Mus musculus]			0.952381	0.56					None
XP_986430.1	PREDICTED: similar to Serine--pyruvate aminotransferase, mitochondrial precursor (SPT) (Alanine--glyoxylate aminotransferase) (AGT) [Mus musculus]	1.02	0.57							NL
XP_896808.2	PREDICTED: similar to Stress-70 protein, mitochondrial precursor (75 kDa glucose-regulated protein) (GRP 75) (Peptide-binding protein 74) (PBP74) (P66 MOT) (Mortalin) [Mus musculus]	1.16	0.8	0.990099	0.49	0.840336	0.76	1.13636	0.2	NL
XP_486246.1	PREDICTED: similar to Tubulin alpha-2 chain (Alpha-tubulin 2) isoform 1 [Mus musculus]			1.21951	0.09					None
XP_909750.1	PREDICTED: similar to Tubulin alpha-2 chain (Alpha-tubulin 2) isoform 4 [Mus musculus]			1.23457	0.07					None
XP_001005849.1	PREDICTED: similar to tubulin, alpha 1 [Mus musculus]			1.16279	0.18					NL
XP_998765.1	PREDICTED: similar to tubulin, alpha 2 isoform 2 isoform 2 [Mus musculus]			1.21951	0.06					NL
XP_901591.1	PREDICTED: similar to tubulin, alpha 2 isoform 2 isoform 3 [Mus musculus]			1.21951	0.09					None
XP_924032.1	PREDICTED: similar to tubulin, alpha 2 isoform 2 isoform 6 [Mus musculus]			1.23457	0.05					None
XP_997231.1	PREDICTED: similar to ubiquitin A-52 residue ribosomal protein fusion product 1 [Mus musculus]			0.990099	0.55					NL
XP_001002029.1	PREDICTED: similar to ubiquitin C isoform 18 [Mus musculus]			1.02041	0.47					NL
XP_001002053.1	PREDICTED: similar to ubiquitin C isoform 22 [Mus musculus]			1.02041	0.49					NL
XP_001002019.1	PREDICTED: similar to ubiquitin C isoform 25 [Mus musculus]			0.943396	0.62					NL
XP_001002045.1	PREDICTED: similar to ubiquitin C isoform 29 [Mus musculus]			0.980392	0.51					NL
XP_001001988.1	PREDICTED: similar to ubiquitin C isoform 4 [Mus musculus]			0.952381	0.56					NL
XP_001001949.1	PREDICTED: similar to ubiquitin C isoform 8 [Mus musculus]			0.970874	0.54					NL
NP_080111.1	propionyl Coenzyme A carboxylase, beta polypeptide [Mus musculus]	1.03	0.59	1.03093	0.5	0.819672	0.79	1.11111	0.23	Fatty acid biosynthesis	Propanoate metabolism	Pyruvate metabolism	Valine, leucine and isoleucine degradation
NP_032823.1	pyruvate carboxylase [Mus musculus]	1.14	0.99	1.20482	0.02			1.0989	0.02	Alanine and aspartate metabolism	Citrate cycle (TCA cycle)	Pyruvate metabolism
NP_663605.1	pyruvate dehydrogenase kinase, isoenzyme 3 [Mus musculus]			0.787402	0.67					Fc epsilon RI signaling pathway	T cell receptor signaling pathway
NP_035229.2	pyruvate kinase 3 [Mus musculus]			1.35135	0.07					Carbon fixation	Glycolysis / Gluconeogenesis	Purine metabolism	Pyruvate metabolism
NP_077239.1	ribosomal protein S27a [Mus musculus]			0.980392	0.54					Ribosome
NP_058566.3	SA hypertension-associated homolog [Mus musculus]							0.632911	1	DN
NP_082506.1	serine hydroxymethyl transferase 2 (mitochondrial) [Mus musculus]	0.93	0.34					1.06383	0.32	Cyanoamino acid metabolism	Glycine, serine and threonine metabolism	Lysine degradation	Methane metabolism	One carbon pool by folate
NP_063932.1	succinate-CoA ligase, GDP-forming, alpha subunit [Mus musculus]	1.03	0.53	0.892857	0.73	1.19048	0.11	1.17647	0.05	Citrate cycle (TCA cycle)	Propanoate metabolism
NP_035636.1	succinate-Coenzyme A ligase, ADP-forming, beta subunit [Mus musculus]	0.93	0.36	0.892857	0.92	1	0.51	1.21951	0.03	C5-Branched dibasic acid metabolism	Citrate cycle (TCA cycle)	Glyoxylate and dicarboxylate metabolism	Propanoate metabolism	Reductive carboxylate cycle (CO2 fixation)
NP_038699.2	superoxide dismutase 2, mitochondrial [Mus musculus]	0.87	0.23	0.961538	0.63	0.934579	0.82	1.31579	0	None
NP_077725.1	syntaxin 1B2 [Mus musculus]			1.88679	0.1					Parkinson's disease	SNARE interactions in vesicular transport
NP_033463.1	thiosulfate sulfurtransferase, mitochondrial [Mus musculus]	0.82	0.01	1.40845	0.03			0.934579	0.63	Cysteine metabolism
NP_766333.1	Tu translation elongation factor, mitochondrial [Mus musculus]	1.07	0.6	1.13636	0.12	0.892857	0.68	1.31579	0	Purine metabolism	Selenoamino acid metabolism	Sulfur metabolism
NP_035783.1	tubulin, alpha 1 [Mus musculus]			1.26582	0.04					Gap junction	Pathogenic Escherichia coli infection - EHEC	Pathogenic Escherichia coli infection - EPEC
NP_035784.1	tubulin, alpha 2 [Mus musculus]			1.20482	0.06					Gap junction	Pathogenic Escherichia coli infection - EHEC	Pathogenic Escherichia coli infection - EPEC
NP_033472.1	tubulin, alpha 3 [Mus musculus]			1.35135	0.03					Gap junction	Pathogenic Escherichia coli infection - EHEC	Pathogenic Escherichia coli infection - EPEC
NP_033473.1	tubulin, alpha 4 [Mus musculus]			1.2987	0.05					Gap junction	Pathogenic Escherichia coli infection - EHEC	Pathogenic Escherichia coli infection - EPEC
NP_033474.1	tubulin, alpha 6 [Mus musculus]			1.31579	0.03					Gap junction	Pathogenic Escherichia coli infection - EHEC	Pathogenic Escherichia coli infection - EPEC
NP_033475.1	tubulin, alpha 7 [Mus musculus]			1.36986	0.03					Gap junction	Pathogenic Escherichia coli infection - EHEC	Pathogenic Escherichia coli infection - EPEC
NP_059075.1	tubulin, alpha 8 [Mus musculus]			1.42857	0.06					Gap junction	Pathogenic Escherichia coli infection - EHEC	Pathogenic Escherichia coli infection - EPEC
NP_076205.1	tubulin, beta [Mus musculus]			1.26582	0.07					Gap junction	Pathogenic Escherichia coli infection - EHEC	Pathogenic Escherichia coli infection - EPEC
NP_033476.1	tubulin, beta 2 [Mus musculus]			1.28205	0.05					Gap junction	Pathogenic Escherichia coli infection - EHEC	Pathogenic Escherichia coli infection - EPEC
NP_075768.1	tubulin, beta 3 [Mus musculus]			1.36986	0.08					Gap junction	Pathogenic Escherichia coli infection - EHEC	Pathogenic Escherichia coli infection - EPEC
NP_033477.2	tubulin, beta 4 [Mus musculus]			1.17647	0.22					Gap junction	Pathogenic Escherichia coli infection - EHEC	Pathogenic Escherichia coli infection - EPEC
NP_035785.1	tubulin, beta 5 [Mus musculus]			1.2987	0.06					Gap junction	Pathogenic Escherichia coli infection - EHEC	Pathogenic Escherichia coli infection - EPEC
NP_080749.2	tubulin, beta 6 [Mus musculus]			1.16279	0.29					Gap junction	Pathogenic Escherichia coli infection - EHEC	Pathogenic Escherichia coli infection - EPEC
NP_033562.2	tyrosine 3-monooxygenase/tryptophan 5-monooxygenase activation protein, epsilon polypeptide [Mus musculus]			0.980392	0.5					Cell cycle
NP_035870.1	tyrosine 3-monooxygenase/tryptophan 5-monooxygenase activation protein, zeta polypeptide [Mus musculus]			1.11111	0.29					Cell cycle
NP_063936.1	ubiquitin A-52 residue ribosomal protein fusion product 1 [Mus musculus]			0.990099	0.53					Ribosome
NP_035794.1	ubiquitin B [Mus musculus]			1	0.53					PPAR signaling pathway	Parkinson's disease	Ribosome
NP_062613.2	ubiquitin C [Mus musculus]			0.990099	0.47					NL
