# Supplementary material for: Tissue-Specific Remodeling of the Mitochondrial Proteome in Type 1 Diabetic Akita Mice
Source: Oxford University Press journal article supplement (doi:10.2337/db09-0259), 2009-06-19
Supplement: db090259-sup-supplementaltable_s14.doc [file db090259-sup-supplementaltable_s14.doc]

**Table S14:** List of all proteins detected in matrix fractions of liver, brain, heart, and kidney mitochondria of Akita, presented as fold change compared to WT, and sorted by canonical pathways. Highlighted cells indicate a significant difference (p<0.05) compared to WT (red = increased, yellow = decreased). Empty cells = protein was not detected; WT only = protein was only detected in WT; Diabetic only = protein was only detected in Akita

| **Canonical Pathway** | **Accession** | **Liver** | **Brain** | **Heart** | **Kidney** |
| --- | --- | --- | --- | --- | --- |
|  |  |  |  |  |  |
| **1- and 2-Methylnaphthalene degradation** |  |  |  |  |  |
| acetyl-Coenzyme A dehydrogenase, long-chain | NP_031407.2 | 0.89 | 1.25 | 1.14 | 1.18 |
| acetyl-Coenzyme A dehydrogenase, medium chain | NP_031408.1 | 0.96 | 1.12 | 1.03 | 0.94 |
| acyl-Coenzyme A dehydrogenase, short chain | NP_031409.2 | 0.76 | 1.45 | 1.11 | 1.03 |
| hypothetical protein LOC192136 | NP_619595.2 |  |  |  | WT only |
| isovaleryl coenzyme A dehydrogenase | NP_062800.1 | 0.78 | 1.05 | 0.75 | 0.84 |
|  |  |  |  |  |  |
| **1,1,1-Trichloro-2,2-bis(4-chlorophenyl)ethane (DDT) degradation** |  |  |  |  |  |
| hydroxyacyl-Coenzyme A dehydrogenase type II | NP_058043.3 | 0.88 | 1.19 | 1.08 | 1.10 |
|  |  |  |  |  |  |
| **3-Chloroacrylic acid degradation** |  |  |  |  |  |
| aldehyde dehydrogenase 2, mitochondrial | NP_033786.1 | 0.76 | 0.97 | 0.83 | 1.19 |
| aldehyde dehydrogenase family 6, subfamily A1 | NP_598803.1 | 0.90 | 1.15 | 0.94 | 0.99 |
| aldehyde dehydrogenase family 7, member A1 | NP_613066.1 | 0.99 | 1.20 |  | 1.16 |
|  |  |  |  |  |  |
| **Adipocytokine signaling pathway** |  |  |  |  |  |
| carnitine O-octanoyltransferase | NP_076222.1 | 0.70 |  |  | 0.68 |
|  |  |  |  |  |  |
| **Alanine and aspartate metabolism** |  |  |  |  |  |
| 4-aminobutyrate aminotransferase | NP_766549.2 | 1.04 | 1.11 |  | 1.10 |
| alanine-glyoxylate aminotransferase | NP_057911.1 | 1.09 |  |  |  |
| carnitine O-octanoyltransferase | NP_076222.1 | 0.70 |  |  | 0.68 |
| dihydrolipoamide dehydrogenase | NP_031887.2 | 0.86 | 0.99 | 0.84 | 1.20 |
| dihydrolipoamide S-acetyltransferase (E2 component of pyruvate dehydrogenase complex) | NP_663589.2 |  | 0.93 | 0.99 | 1.09 |
| fumarate hydratase 1 | NP_034339.1 | 1.02 | 1.04 | 0.90 | 1.08 |
| glutamate oxaloacetate transaminase 2, mitochondrial | NP_034455.1 | 0.76 | 0.69 | 1.25 | 1.54 |
| glutamic pyruvate transaminase (alanine aminotransferase) 2 | NP_776291.1 | 1.3 |  |  |  |
| PREDICTED: similar to Serine--pyruvate aminotransferase, mitochondrial precursor (SPT) (Alanine--glyoxylate aminotransferase) (AGT) | XP_986430.1 | 1.02 |  |  |  |
| pyruvate carboxylase | NP_032823.1 | 1.14 | 1.20 |  | 1.10 |
|  |  |  |  |  |  |
| **Alkaloid biosynthesis II** |  |  |  |  |  |
| peroxiredoxin 3 | NP_031478.1 | 0.93 | 1.04 | 0.94 | 1.18 |
|  |  |  |  |  |  |
| **alpha-Linolenic acid metabolism** |  |  |  |  |  |
| acyl-Coenzyme A oxidase 1, palmitoyl | NP_056544.2 | 0.70 |  |  | 0.57 |
| acyl-Coenzyme A oxidase 2, branched chain | NP_444345.1 | 1.03 |  |  | 0.72 |
| acyl-Coenzyme A oxidase 3, pristanoyl | NP_109646.2 |  |  |  | 0.62 |
| hypothetical protein LOC264895 | NP_722502.1 | 0.94 | 1.22 |  |  |
|  |  |  |  |  |  |
| **Aminosugars metabolism** |  |  |  |  |  |
| hexokinase 1 | NP_034568.1 |  | 0.87 |  |  |
| PREDICTED: similar to hexokinase 1 isoform 8 | XP_984258.1 |  | 0.88 |  |  |
| PREDICTED: similar to hexokinase 1 isoform HKI-R isoform 1 | XP_983987.1 |  | 1.09 |  |  |
| PREDICTED: similar to Hexokinase-1 (Hexokinase type I) (HK I) (Brain form hexokinase) isoform 2 | XP_984038.1 |  | 0.83 |  |  |
| PREDICTED: similar to Hexokinase-1 (Hexokinase type I) (HK I) (Hexokinase, tumor isozyme) isoform 10 | XP_984334.1 |  | 0.86 |  |  |
| PREDICTED: similar to Hexokinase-1 (Hexokinase type I) (HK I) (Hexokinase, tumor isozyme) isoform 11 | XP_984381.1 |  | 0.87 |  |  |
| PREDICTED: similar to Hexokinase-1 (Hexokinase type I) (HK I) (Hexokinase, tumor isozyme) isoform 3 | XP_984070.1 |  | 0.84 |  |  |
| PREDICTED: similar to Hexokinase-1 (Hexokinase type I) (HK I) (Hexokinase, tumor isozyme) isoform 4 | XP_984107.1 |  | 0.87 |  |  |
| PREDICTED: similar to Hexokinase-1 (Hexokinase type I) (HK I) (Hexokinase, tumor isozyme) isoform 5 | XP_984146.1 |  | 0.86 |  |  |
| PREDICTED: similar to Hexokinase-1 (Hexokinase type I) (HK I) (Hexokinase, tumor isozyme) isoform 6 | XP_984188.1 |  | 0.86 |  |  |
| PREDICTED: similar to Hexokinase-1 (Hexokinase type I) (HK I) (Hexokinase, tumor isozyme) isoform 7 | XP_984217.1 |  | 0.88 |  |  |
| PREDICTED: similar to Hexokinase-1 (Hexokinase type I) (HK I) (Hexokinase, tumor isozyme) isoform 9 | XP_984296.1 |  | 0.90 |  |  |
|  |  |  |  |  |  |
| **Antigen processing and presentation** |  |  |  |  |  |
| cathepsin B preproprotein | NP_031824.1 |  | Diabetic only |  |  |
| heat shock protein 2 | NP_001002012.1 |  | 1.02 |  |  |
| heat shock protein 2 | NP_032327.2 |  | 1.10 |  |  |
| heat shock protein 8 |  |  | 1.08 |  |  |
|  |  |  |  |  |  |
| **Arachidonic acid metabolism** |  |  |  |  |  |
| glutathione peroxidase 1 | NP_032186.2 | 1.03 |  |  | 1.28 |
| epoxide hydrolase 2, cytoplasmic | NP_031966.2 | 0.83 |  |  | 0.74 |
|  |  |  |  |  |  |
| **Arginine and proline metabolism** |  |  |  |  |  |
| creatine kinase, brain | NP_067248.1 |  | 1.19 |  |  |
| glutamate dehydrogenase 1 | NP_032159.1 | 0.70 | 1.27 | 0.76 | 1.64 |
| glutamate oxaloacetate transaminase 2, mitochondrial | NP_034455.1 | 0.76 | 0.69 | 1.25 | 1.54 |
| ornithine transcarbamylase | NP_032795.1 | 0.79 |  |  |  |
|  |  |  |  |  |  |
| **Ascorbate and aldarate metabolism** |  |  |  |  |  |
| aldehyde dehydrogenase 2, mitochondrial | NP_033786.1 | 0.76 | 0.97 | 0.83 | 1.19 |
| aldehyde dehydrogenase family 6, subfamily A1 | NP_598803.1 | 0.90 | 1.15 | 0.94 | 0.99 |
| aldehyde dehydrogenase family 7, member A1 | NP_613066.1 | 0.99 | 1.20 |  | 1.16 |
|  |  |  |  |  |  |
| **Benzoate degradation via CoA ligation** |  |  |  |  |  |
| 3-ketoacyl-CoA thiolase B | NP_666342.1 | 0.68 |  |  | 0.77 |
| acetyl-Coenzyme A acetyltransferase 1 precursor | NP_659033.1 | 0.69 | 0.93 | 0.98 | 0.77 |
| acetyl-Coenzyme A acyltransferase 1 | NP_570934.1 | 0.68 |  |  | 0.76 |
| acetyl-Coenzyme A acyltransferase 2 (mitochondrial 3-oxoacyl-Coenzyme A thiolase) | NP_803421.1 | 0.75 | 1.27 | 1.41 | 1.69 |
| dodecenoyl-Coenzyme A delta isomerase (3,2 trans-enoyl-Coenyme A isomerase) | NP_034153.2 | 0.83 | 1.14 | 1.11 | 1.32 |
| enoyl Coenzyme A hydratase, short chain, 1, mitochondrial | NP_444349.1 | 1.05 | 1.00 | 0.94 | 1.01 |
| hydroxyacyl-Coenzyme A dehydrogenase/3-ketoacyl-Coenzyme A thiolase/enoyl-Coenzyme A hydratase (trifunctional protein), alpha subunit | NP_849209.1 | 1.16 | 1.33 | 1.20 | 1.52 |
|  |  |  |  |  |  |
| **beta-Alanine metabolism** |  |  |  |  |  |
| 4-aminobutyrate aminotransferase | NP_766549.2 | 1.04 | 1.11 |  | 1.10 |
| acetyl-Coenzyme A dehydrogenase, long-chain | NP_031407.2 | 0.89 | 1.25 | 1.14 | 1.18 |
| acetyl-Coenzyme A dehydrogenase, medium chain | NP_031408.1 | 0.96 | 1.12 | 1.03 | 0.94 |
| acyl-Coenzyme A dehydrogenase, short chain | NP_031409.2 | 0.76 | 1.45 | 1.11 | 1.03 |
| acyl-Coenzyme A dehydrogenase, very long chain | NP_059062.1 |  |  | 1.03 |  |
| aldehyde dehydrogenase 2, mitochondrial | NP_033786.1 | 0.76 | 0.97 | 0.83 | 1.19 |
| aldehyde dehydrogenase family 6, subfamily A1 | NP_598803.1 | 0.90 | 1.15 | 0.94 | 0.99 |
| aldehyde dehydrogenase family 7, member A1 | NP_613066.1 | 0.99 | 1.20 |  | 1.16 |
| dodecenoyl-Coenzyme A delta isomerase (3,2 trans-enoyl-Coenyme A isomerase) | NP_034153.2 | 0.83 | 1.14 | 1.11 | 1.32 |
| enoyl Coenzyme A hydratase, short chain, 1, mitochondrial | NP_444349.1 | 1.05 | 1.00 | 0.94 | 1.01 |
| enoyl coenzyme A hydratase 1, peroxisomal | NP_058052.1 |  |  | 1.56 |  |
| glutaryl-Coenzyme A dehydrogenase | NP_032123.1 | 0.95 |  |  | 1.00 |
| hydroxyacyl-Coenzyme A dehydrogenase/3-ketoacyl-Coenzyme A thiolase/enoyl-Coenzyme A hydratase (trifunctional protein), alpha subunit | NP_849209.1 | 1.16 | 1.33 | 1.20 | 1.52 |
| isovaleryl coenzyme A dehydrogenase | NP_062800.1 | 0.78 | 1.05 | 0.75 | 0.84 |
| L-specific multifunctional beta-oxdiation protein | NP_076226.2 | 0.65 |  |  | 0.41 |
| PREDICTED: hypothetical protein LOC338350 isoform 1 | XP_488540.2 |  |  | 1.15 | 0.93 |
| PREDICTED: similar to acyl-Coenzyme A dehydrogenase family, member 10 isoform 4 | XP_921248.1 |  |  | 1.09 | 0.93 |
|  |  |  |  |  |  |
| **Bile acid biosynthesis** |  |  |  |  |  |
| acetyl-Coenzyme A dehydrogenase, long-chain | NP_031407.2 | 0.89 | 1.25 | 1.14 | 1.18 |
| acetyl-Coenzyme A dehydrogenase, medium chain | NP_031408.1 | 0.96 | 1.12 | 1.03 | 0.94 |
| acyl-Coenzyme A dehydrogenase, short chain | NP_031409.2 | 0.76 | 1.45 | 1.11 | 1.03 |
| isovaleryl coenzyme A dehydrogenase | NP_062800.1 | 0.78 | 1.05 | 0.75 | 0.84 |
|  |  |  |  |  |  |
| **Biosynthesis of type II polyketide backbone** |  |  |  |  |  |
| hydroxyacyl-Coenzyme A dehydrogenase type II | NP_058043.3 | 0.88 | 1.19 | 1.08 | 1.10 |
|  |  |  |  |  |  |
| **Butanoate metabolism** |  |  |  |  |  |
| 3-hydroxy-3-methylglutaryl-Coenzyme A synthase 2 | NP_032282.2 | 1.01 |  |  |  |
| 3-ketoacyl-CoA thiolase B | NP_666342.1 | 0.68 |  |  | 0.77 |
| 3-oxoacid CoA transferase 1 | NP_077150.1 |  | 1.15 | 0.88 | 1.19 |
| 4-aminobutyrate aminotransferase | NP_766549.2 | 1.04 | 1.11 |  | 1.10 |
| acetyl-Coenzyme A acetyltransferase 1 precursor | NP_659033.1 | 0.69 | 0.93 | 0.98 | 0.77 |
| acetyl-Coenzyme A acyltransferase 1 | NP_570934.1 | 0.68 |  |  | 0.76 |
| acetyl-Coenzyme A acyltransferase 2 (mitochondrial 3-oxoacyl-Coenzyme A thiolase) | NP_803421.1 | 0.75 | 1.27 | 1.41 | 1.69 |
| aldehyde dehydrogenase 2, mitochondrial | NP_033786.1 | 0.76 | 0.97 | 0.83 | 1.19 |
| aldehyde dehydrogenase family 6, subfamily A1 | NP_598803.1 | 0.90 | 1.15 | 0.94 | 0.99 |
| aldehyde dehydrogenase family 7, member A1 | NP_613066.1 | 0.99 | 1.20 |  | 1.16 |
| butyryl Coenzyme A synthetase 1 | NP_473435.1 | 0.70 |  |  | 1.30 |
| dodecenoyl-Coenzyme A delta isomerase (3,2 trans-enoyl-Coenyme A isomerase) | NP_034153.2 | 0.83 | 1.14 | 1.11 | 1.32 |
| enoyl Coenzyme A hydratase, short chain, 1, mitochondrial | NP_444349.1 | 1.05 | 1.00 | 0.94 | 1.01 |
| enoyl coenzyme A hydratase 1, peroxisomal | NP_058052.1 |  |  | 1.56 |  |
| hydroxyacyl-Coenzyme A dehydrogenase/3-ketoacyl-Coenzyme A thiolase/enoyl-Coenzyme A hydratase (trifunctional protein), alpha subunit | NP_849209.1 | 1.16 | 1.33 | 1.20 | 1.52 |
| hydroxyacyl-Coenzyme A dehydrogenase type II | NP_058043.3 | 0.88 | 1.19 | 1.08 | 1.10 |
| hypothetical protein LOC264895 | NP_722502.1 | 0.94 | 1.22 |  |  |
| L-specific multifunctional beta-oxdiation protein | NP_076226.2 | 0.65 |  |  | 0.41 |
| peroxiredoxin 3 | NP_031478.1 | 0.93 | 1.04 | 0.94 | 1.18 |
| PREDICTED: similar to 3-hydroxy-3-methylglutaryl-Coenzyme A synthase 2 | XP_984323.1 | 1.01 |  |  |  |
| PREDICTED: similar to butyryl Coenzyme A synthetase 1 | XP_986046.1 | 0.73 |  |  |  |
|  |  |  |  |  |  |
| **C5-Branched dibasic acid metabolism** |  |  |  |  |  |
| succinate-Coenzyme A ligase, ADP-forming, beta subunit | NP_035636.1 | 0.93 | 0.89 | 1.00 | 1.22 |
|  |  |  |  |  |  |
| **Caprolactam degradation** |  |  |  |  |  |
| aldo-keto reductase family 1, member A4 (aldehyde reductase) | NP_067448.1 |  |  |  | 1.43 |
| dodecenoyl-Coenzyme A delta isomerase (3,2 trans-enoyl-Coenyme A isomerase) | NP_034153.2 | 0.83 | 1.14 | 1.11 | 1.32 |
| enoyl Coenzyme A hydratase, short chain, 1, mitochondrial | NP_444349.1 | 1.05 | 1.00 | 0.94 | 1.01 |
| hydroxyacyl-Coenzyme A dehydrogenase/3-ketoacyl-Coenzyme A thiolase/enoyl-Coenzyme A hydratase (trifunctional protein), alpha subunit | NP_849209.1 | 1.16 | 1.33 | 1.20 | 1.52 |
| N-acylsphingosine amidohydrolase (acid ceramidase) 1 | NP_062708.1 |  | 0.93 |  |  |
|  |  |  |  |  |  |
| **Carbon fixation** |  |  |  |  |  |
| aldolase 1, A isoform | NP_031464.1 |  | 1.00 |  |  |
| aldolase 3, C isoform | NP_033787.2 |  | 1.14 |  |  |
| glutamic pyruvate transaminase (alanine aminotransferase) 2 | NP_776291.1 | 1.30 |  |  |  |
| pyruvate kinase 3 | NP_035229.2 |  | 1.35 |  |  |
|  |  |  |  |  |  |
| **Carotenoid biosynthesis – General** |  |  |  |  |  |
| hydroxyacyl-Coenzyme A dehydrogenase type II | NP_058043.3 | 0.88 | 1.19 | 1.08 | 1.10 |
|  |  |  |  |  |  |
| **Cell cycle** |  |  |  |  |  |
| 3-monooxgenase/tryptophan 5-monooxygenase activation protein, gamma polypeptide | NP_061359.2 |  | 0.99 |  |  |
| tyrosine 3-monooxygenase/tryptophan 5-monooxygenase activation protein, epsilon polypeptide | NP_033562.2 |  | 0.98 |  |  |
| tyrosine 3-monooxygenase/tryptophan 5-monooxygenase activation protein, eta polypeptide | NP_035868.1 |  | 1.02 |  |  |
| tyrosine 3-monooxygenase/tryptophan 5-monooxygenase activation protein, zeta polypeptide | NP_035870.1 |  | 1.11 |  |  |
|  |  |  |  |  |  |
| **Cholera - Infection** |  |  |  |  |  |
| adenylate kinase 3 | NP_067274.1 | 0.92 | 1.19 | 0.92 | 1.39 |
|  |  |  |  |  |  |
| **Chronic myeloid leukemia** |  |  |  |  |  |
| glyoxylate reductase/hydroxypyruvate reductase | NP_525028.1 |  |  |  | 1.32 |
| heat shock protein 2 | NP_001002012.1 |  | 1.02 |  |  |
| heat shock protein 2 | NP_032327.2 |  | 1.10 |  |  |
| heat shock protein 8 | NP_112442.2 |  | 1.08 |  |  |
|  |  |  |  |  |  |
| **Citrate cycle (TCA cycle)** |  |  |  |  |  |
| aconitase 2, mitochondrial | NP_542364.1 | 1.07 | 1.00 | 0.96 | 1.32 |
| citrate synthase | NP_080720.1 | 0.93 | 0.97 | 0.86 | 1.25 |
| citrate synthase-like protein | NP_082221.1 | 0.69 | 1.06 | 0.90 | 1.37 |
| dihydrolipoamide dehydrogenase | NP_031887.2 | 0.86 | 0.99 | 0.84 | 1.20 |
| dihydrolipoamide S-acetyltransferase (E2 component of pyruvate dehydrogenase complex) | NP_663589.2 |  | 0.93 | 0.99 | 1.09 |
| fumarate hydratase 1 | NP_034339.1 | 1.02 | 1.04 | 0.90 | 1.08 |
| isocitrate dehydrogenase 2 (NADP+), mitochondrial | NP_766599.1 | 1.17 | 1.10 | 1.11 | 1.27 |
| isocitrate dehydrogenase 3 (NAD+) alpha | NP_083849.1 |  | 0.87 | 0.88 | 1.52 |
| isocitrate dehydrogenase 3, beta subunit | NP_570954.1 |  | 1.02 | 1.20 | 1.15 |
| malate dehydrogenase 2, NAD (mitochondrial) | NP_032643.2 | 0.91 | 0.97 | 0.76 | 1.30 |
| pyruvate carboxylase | NP_032823.1 | 1.14 | 1.20 |  | 1.10 |
| succinate-CoA ligase, GDP-forming, alpha subunit | NP_063932.1 | 1.03 | 0.89 | 1.19 | 1.18 |
| succinate-Coenzyme A ligase, ADP-forming, beta subunit | NP_035636.1 | 0.93 | 0.89 | 1.00 | 1.22 |
|  |  |  |  |  |  |
| **Cyanoamino acid metabolism** |  |  |  |  |  |
| serine hydroxymethyl transferase 2 (mitochondrial) | NP_082506.1 | 0.93 |  |  | 1.06 |
|  |  |  |  |  |  |
| **Cysteine metabolism** |  |  |  |  |  |
| glutamate oxaloacetate transaminase 2, mitochondrial | NP_034455.1 | 0.76 | 0.69 | 1.25 | 1.54 |
| malate dehydrogenase 2, NAD (mitochondrial) | NP_032643.2 | 0.91 | 0.97 | 0.76 | 1.30 |
| thiosulfate sulfurtransferase, mitochondrial | NP_033463.1 | 0.82 | 1.41 |  | 0.93 |
|  |  |  |  |  |  |
| **Fatty acid biosynthesis** |  |  |  |  |  |
| propionyl Coenzyme A carboxylase, beta polypeptide | NP_080111.1 | 1.03 | 1.03 | 0.82 | 1.11 |
|  |  |  |  |  |  |
| **Fatty acid elongation in mitochondria** |  |  |  |  |  |
| enoyl coenzyme A hydratase 1, peroxisomal | NP_058052.1 |  |  | 1.56 |  |
| hydroxyacyl-Coenzyme A dehydrogenase/3-ketoacyl-Coenzyme A thiolase/enoyl-Coenzyme A hydratase (trifunctional protein), alpha subunit | NP_849209.1 | 1.16 | 1.33 | 1.20 | 1.52 |
| L-specific multifunctional beta-oxdiation protein | NP_076226.2 | 0.65 |  |  | 0.41 |
| peroxisomal trans 2-enoyl CoA reductase | NP_076012.2 | 1.11 |  |  | 0.69 |
|  |  |  |  |  |  |
| **Fatty acid metabolism** |  |  |  |  |  |
| 3-ketoacyl-CoA thiolase B | NP_666342.1 | 0.68 |  |  | 0.77 |
| acetyl-Coenzyme A acetyltransferase 1 precursor | NP_659033.1 | 0.69 | 0.93 | 0.98 | 0.77 |
| acetyl-Coenzyme A acyltransferase 1 | NP_570934.1 | 0.68 |  |  | 0.76 |
| acetyl-Coenzyme A acyltransferase 2 (mitochondrial 3-oxoacyl-Coenzyme A thiolase) | NP_803421.1 | 0.75 | 1.27 | 1.41 | 1.69 |
| acetyl-Coenzyme A dehydrogenase, long-chain | NP_031407.2 | 0.89 | 1.25 | 1.14 | 1.18 |
| acetyl-Coenzyme A dehydrogenase, medium chain | NP_031408.1 | 0.96 | 1.12 | 1.03 | 0.94 |
| acyl-Coenzyme A dehydrogenase, short chain | NP_031409.2 | 0.76 | 1.45 | 1.11 | 1.03 |
| acyl-Coenzyme A dehydrogenase, very long chain | NP_059062.1 |  |  | 1.03 |  |
| acyl-Coenzyme A oxidase 1, palmitoyl | NP_056544.2 | 0.70 |  |  | 0.57 |
| acyl-Coenzyme A oxidase 2, branched chain | NP_444345.1 | 1.03 |  |  | 0.72 |
| acyl-Coenzyme A oxidase 3, pristanoyl | NP_109646.2 |  |  |  | 0.62 |
| aldehyde dehydrogenase 2, mitochondrial | NP_033786.1 | 0.76 | 0.97 | 0.83 | 1.19 |
| aldehyde dehydrogenase family 6, subfamily A1 | NP_598803.1 | 0.90 | 1.15 | 0.94 | 0.99 |
| aldehyde dehydrogenase family 7, member A1 | NP_613066.1 | 0.99 | 1.20 |  | 1.16 |
| carnitine O-octanoyltransferase | NP_076222.1 | 0.70 |  |  | 0.68 |
| dodecenoyl-Coenzyme A delta isomerase (3,2 trans-enoyl-Coenyme A isomerase) | NP_034153.2 | 0.83 | 1.14 | 1.11 | 1.32 |
| enoyl Coenzyme A hydratase, short chain, 1, mitochondrial | NP_444349.1 | 1.05 | 1.00 | 0.94 | 1.01 |
| enoyl coenzyme A hydratase 1, peroxisomal | NP_058052.1 |  |  | 1.56 |  |
| glutaryl-Coenzyme A dehydrogenase | NP_032123.1 | 0.95 |  |  | 1.00 |
| hydroxyacyl-Coenzyme A dehydrogenase/3-ketoacyl-Coenzyme A thiolase/enoyl-Coenzyme A hydratase (trifunctional protein), alpha subunit | NP_849209.1 | 1.16 | 1.33 | 1.20 | 1.52 |
| isovaleryl coenzyme A dehydrogenase | NP_062800.1 | 0.78 | 1.05 | 0.75 | 0.84 |
| L-specific multifunctional beta-oxdiation protein | NP_076226.2 | 0.65 |  |  | 0.41 |
| PREDICTED: hypothetical protein LOC338350 isoform 1 | XP_488540.2 |  |  | 1.15 | 0.93 |
| PREDICTED: similar to acyl-Coenzyme A dehydrogenase family, member 10 isoform 4 | XP_921248.1 |  |  | 1.09 | 0.93 |
|  |  |  |  |  |  |
| **Fc epsilon RI signaling pathway** |  |  |  |  |  |
| pyruvate dehydrogenase kinase, isoenzyme 3 | NP_663605.1 |  | 0.79 |  |  |
|  |  |  |  |  |  |
| **Fluorene degradation** |  |  |  |  |  |
| hydroxyacyl-Coenzyme A dehydrogenase type II | NP_058043.3 | 0.88 | 1.19 | 1.08 | 1.10 |
|  |  |  |  |  |  |
| **Fructose and mannose metabolism** |  |  |  |  |  |
| aldolase 1, A isoform | NP_031464.1 |  | 1.00 |  |  |
| aldolase 3, C isoform | NP_033787.2 |  | 1.14 |  |  |
| hexokinase 1 | NP_034568.1 |  | 0.87 |  |  |
| PREDICTED: similar to hexokinase 1 isoform 8 | XP_984258.1 |  | 0.88 |  |  |
| PREDICTED: similar to hexokinase 1 isoform HKI-R isoform 1 | XP_983987.1 |  | 1.09 |  |  |
| PREDICTED: similar to Hexokinase-1 (Hexokinase type I) (HK I) (Brain form hexokinase) isoform 2 | XP_984038.1 |  | 0.83 |  |  |
| PREDICTED: similar to Hexokinase-1 (Hexokinase type I) (HK I) (Hexokinase, tumor isozyme) isoform 10 | XP_984334.1 |  | 0.86 |  |  |
| PREDICTED: similar to Hexokinase-1 (Hexokinase type I) (HK I) (Hexokinase, tumor isozyme) isoform 11 | XP_984381.1 |  | 0.87 |  |  |
| PREDICTED: similar to Hexokinase-1 (Hexokinase type I) (HK I) (Hexokinase, tumor isozyme) isoform 3 | XP_984070.1 |  | 0.84 |  |  |
| PREDICTED: similar to Hexokinase-1 (Hexokinase type I) (HK I) (Hexokinase, tumor isozyme) isoform 4 | XP_984107.1 |  | 0.87 |  |  |
| PREDICTED: similar to Hexokinase-1 (Hexokinase type I) (HK I) (Hexokinase, tumor isozyme) isoform 5 | XP_984146.1 |  | 0.86 |  |  |
| PREDICTED: similar to Hexokinase-1 (Hexokinase type I) (HK I) (Hexokinase, tumor isozyme) isoform 6 | XP_984188.1 |  | 0.86 |  |  |
| PREDICTED: similar to Hexokinase-1 (Hexokinase type I) (HK I) (Hexokinase, tumor isozyme) isoform 7 | XP_984217.1 |  | 0.88 |  |  |
| PREDICTED: similar to Hexokinase-1 (Hexokinase type I) (HK I) (Hexokinase, tumor isozyme) isoform 9 | XP_984296.1 |  | 0.90 |  |  |
|  |  |  |  |  |  |
| **Galactose metabolism** |  |  |  |  |  |
| hexokinase 1 | NP_034568.1 |  | 0.87 |  |  |
| PREDICTED: similar to hexokinase 1 isoform 8 | XP_984258.1 |  | 0.88 |  |  |
| PREDICTED: similar to hexokinase 1 isoform HKI-R isoform 1 | XP_983987.1 |  | 1.09 |  |  |
| PREDICTED: similar to Hexokinase-1 (Hexokinase type I) (HK I) (Brain form hexokinase) isoform 2 | XP_984038.1 |  | 0.83 |  |  |
| PREDICTED: similar to Hexokinase-1 (Hexokinase type I) (HK I) (Hexokinase, tumor isozyme) isoform 10 | XP_984334.1 |  | 0.86 |  |  |
| PREDICTED: similar to Hexokinase-1 (Hexokinase type I) (HK I) (Hexokinase, tumor isozyme) isoform 11 | XP_984381.1 |  | 0.87 |  |  |
| PREDICTED: similar to Hexokinase-1 (Hexokinase type I) (HK I) (Hexokinase, tumor isozyme) isoform 3 | XP_984070.1 |  | 0.84 |  |  |
| PREDICTED: similar to Hexokinase-1 (Hexokinase type I) (HK I) (Hexokinase, tumor isozyme) isoform 4 | XP_984107.1 |  | 0.87 |  |  |
| PREDICTED: similar to Hexokinase-1 (Hexokinase type I) (HK I) (Hexokinase, tumor isozyme) isoform 5 | XP_984146.1 |  | 0.86 |  |  |
| PREDICTED: similar to Hexokinase-1 (Hexokinase type I) (HK I) (Hexokinase, tumor isozyme) isoform 6 | XP_984188.1 |  | 0.86 |  |  |
| PREDICTED: similar to Hexokinase-1 (Hexokinase type I) (HK I) (Hexokinase, tumor isozyme) isoform 7 | XP_984217.1 |  | 0.88 |  |  |
| PREDICTED: similar to Hexokinase-1 (Hexokinase type I) (HK I) (Hexokinase, tumor isozyme) isoform 9 | XP_984296.1 |  | 0.90 |  |  |
|  |  |  |  |  |  |
| **Gap junction** |  |  |  |  |  |
| tubulin, alpha 1 | NP_035783.1 |  | 1.27 |  |  |
| tubulin, alpha 2 | NP_035784.1 |  | 1.20 |  |  |
| tubulin, alpha 3 | NP_033472.1 |  | 1.35 |  |  |
| tubulin, alpha 4 | NP_033473.1 |  | 1.30 |  |  |
| tubulin, alpha 6 | NP_033474.1 |  | 1.32 |  |  |
| tubulin, alpha 7 | NP_033475.1 |  | 1.37 |  |  |
| tubulin, alpha 8 | NP_059075.1 |  | 1.43 |  |  |
| tubulin, beta | NP_076205.1 |  | 1.27 |  |  |
| tubulin, beta 2 | NP_033476.1 |  | 1.28 |  |  |
| tubulin, beta 3 | NP_075768.1 |  | 1.37 |  |  |
| tubulin, beta 4 | NP_033477.2 |  | 1.18 |  |  |
| tubulin, beta 5 | NP_035785.1 |  | 1.30 |  |  |
| tubulin, beta 6 | NP_080749.2 |  | 1.16 |  |  |
| tubulin, beta, 2 | NP_666228.1 |  | 1.23 |  |  |
|  |  |  |  |  |  |
| **Geraniol degradation** |  |  |  |  |  |
| acetyl-Coenzyme A dehydrogenase, long-chain | NP_031407.2 | 0.89 | 1.25 | 1.14 | 1.18 |
| acetyl-Coenzyme A dehydrogenase, medium chain | NP_031408.1 | 0.96 | 1.12 | 1.03 | 0.94 |
| acyl-Coenzyme A dehydrogenase, short chain | NP_031409.2 | 0.76 | 1.45 | 1.11 | 1.03 |
| dodecenoyl-Coenzyme A delta isomerase (3,2 trans-enoyl-Coenyme A isomerase) | NP_034153.2 | 0.83 | 1.14 | 1.11 | 1.32 |
| enoyl Coenzyme A hydratase, short chain, 1, mitochondrial | NP_444349.1 | 1.05 | 1.00 | 0.94 | 1.01 |
| hypothetical protein LOC192136 | NP_619595.2 |  |  |  | WT only |
| isovaleryl coenzyme A dehydrogenase | NP_062800.1 | 0.78 | 1.05 | 0.75 | 0.84 |
|  |  |  |  |  |  |
| **Glutamate metabolism** |  |  |  |  |  |
| 4-aminobutyrate aminotransferase | NP_766549.2 | 1.04 | 1.11 |  | 1.10 |
| glutamate dehydrogenase 1 | NP_032159.1 | 0.70 | 1.27 | 0.76 | 1.64 |
| glutamate oxaloacetate transaminase 2, mitochondrial | NP_034455.1 | 0.76 | 0.69 | 1.25 | 1.54 |
| glutamine synthetase | NP_032157.2 |  | 1.12 |  |  |
| glutamic pyruvate transaminase (alanine aminotransferase) 2 | NP_776291.1 | 1.30 |  |  |  |
|  |  |  |  |  |  |
| **Glutathione metabolism** |  |  |  |  |  |
| glutathione peroxidase 1 | NP_032186.2 | 1.03 |  |  | 1.28 |
| glutathione S-transferase, mu 1 | NP_034488.1 |  | 1.06 |  |  |
| glutathione S-transferase, mu 2 | NP_032209.1 |  | 1.16 |  |  |
| glutathione S-transferase, mu 4 | NP_081040.1 |  | 1.43 |  |  |
| isocitrate dehydrogenase 2 (NADP+), mitochondrial | NP_766599.1 | 1.17 | 1.10 | 1.11 | 1.27 |
| isocitrate dehydrogenase 3 (NAD+) alpha | NP_083849.1 |  | 0.87 | 0.88 | 1.52 |
| isocitrate dehydrogenase 3, beta subunit | NP_570954.1 |  | 1.02 | 1.20 | 1.15 |
| PREDICTED: glutathione S-transferase, mu 7 isoform 4 | XP_905359.1 |  | 1.47 |  |  |
| PREDICTED: glutathione S-transferase, mu 7 isoform 5 | XP_905367.1 |  | 1.49 |  |  |
| PREDICTED: similar to Glutathione S-transferase Yb-3 (Chain 4) (GST Yb3) (GST class-mu 3) isoform 1 | XP_993199.1 |  | 1.09 |  |  |
| PREDICTED: similar to Glutathione S-transferase Yb-3 (Chain 4) (GST Yb3) (GST class-mu 3) isoform 11 | XP_927955.1 |  | 1.64 |  |  |
| PREDICTED: similar to Glutathione S-transferase Yb-3 (Chain 4) (GST Yb3) (GST class-mu 3) isoform 12 | XP_927960.1 |  | 1.28 |  |  |
| PREDICTED: similar to Glutathione S-transferase Yb-3 (Chain 4) (GST Yb3) (GST class-mu 3) isoform 2 | XP_993239.1 |  | 1.32 |  |  |
| PREDICTED: similar to Glutathione S-transferase Yb-3 (Chain 4) (GST Yb3) (GST class-mu 3) isoform 3 | XP_993269.1 |  | 1.43 |  |  |
| PREDICTED: similar to Glutathione S-transferase Yb-3 (Chain 4) (GST Yb3) (GST class-mu 3) isoform 4 | XP_993305.1 |  | 1.52 |  |  |
| PREDICTED: similar to Glutathione S-transferase Yb-3 (Chain 4) (GST Yb3) (GST class-mu 3) isoform 5 | XP_993337.1 |  | 1.32 |  |  |
| PREDICTED: similar to Glutathione S-transferase Yb-3 (Chain 4) (GST Yb3) (GST class-mu 3) isoform 6 | XP_908764.2 |  | 1.18 |  |  |
| PREDICTED: similar to Glutathione S-transferase Yb-3 (Chain 4) (GST Yb3) (GST class-mu 3) isoform 8 | XP_908949.1 |  | 1.37 |  |  |
| PREDICTED: similar to Glutathione S-transferase Yb-3 (Chain 4) (GST Yb3) (GST class-mu 3) isoform 9 | XP_998701.1 |  | 1.23 |  |  |
|  |  |  |  |  |  |
| **Glycerolipid metabolism** |  |  |  |  |  |
| aldo-keto reductase family 1, member A4 (aldehyde reductase) | NP_067448.1 |  |  |  | 1.43 |
|  |  |  |  |  |  |
| **Glycerophospholipid metabolism** |  |  |  |  |  |
| carnitine O-octanoyltransferase | NP_076222.1 | 0.70 |  |  | 0.68 |
|  |  |  |  |  |  |
| **Glycine, serine and threonine metabolism** |  |  |  |  |  |
| alanine-glyoxylate aminotransferase | NP_057911.1 | 1.09 |  |  |  |
| dihydrolipoamide dehydrogenase | NP_031887.2 | 0.86 | 0.99 | 0.84 | 1.20 |
| dimethylglycine dehydrogenase precursor | NP_083048.1 | 0.91 |  |  | 1.14 |
| PREDICTED: similar to Serine--pyruvate aminotransferase, mitochondrial precursor (SPT) (Alanine--glyoxylate aminotransferase) (AGT) | XP_986430.1 | 1.02 |  |  |  |
| serine hydroxymethyl transferase 2 (mitochondrial) | NP_082506.1 | 0.93 |  |  | 1.06 |
|  |  |  |  |  |  |
| **Glycolysis / Gluconeogenesis** |  |  |  |  |  |
| aldo-keto reductase family 1, member A4 (aldehyde reductase) | NP_067448.1 |  |  |  | 1.43 |
| aldolase 1, A isoform | NP_031464.1 |  | 1.00 |  |  |
| aldolase 3, C isoform | NP_033787.2 |  | 1.14 |  |  |
| dihydrolipoamide dehydrogenase | NP_031887.2 | 0.86 | 0.99 | 0.84 | 1.20 |
| dihydrolipoamide S-acetyltransferase (E2 component of pyruvate dehydrogenase complex) | NP_663589.2 |  | 0.93 | 0.99 | 1.09 |
| enolase 1, alpha non-neuron | NP_075608.1 |  | 1.11 |  |  |
| enolase 2, gamma neuronal | NP_038537.1 |  | 1.15 |  |  |
| enolase 3, beta muscle | NP_031959.1 |  | 0.56 |  |  |
| hexokinase 1 | NP_034568.1 |  | 0.87 |  |  |
| hypothetical protein LOC433182 | NP_001020559.1 |  | 1.15 |  |  |
| malate dehydrogenase 2, NAD (mitochondrial) | NP_032643.2 | 0.91 | 0.97 | 0.76 | 1.30 |
| PREDICTED: similar to hexokinase 1 isoform 8 | XP_984258.1 |  | 0.88 |  |  |
| PREDICTED: similar to hexokinase 1 isoform HKI-R isoform 1 | XP_983987.1 |  | 1.09 |  |  |
| PREDICTED: similar to Hexokinase-1 (Hexokinase type I) (HK I) (Brain form hexokinase) isoform 2 | XP_984038.1 |  | 0.83 |  |  |
| PREDICTED: similar to Hexokinase-1 (Hexokinase type I) (HK I) (Hexokinase, tumor isozyme) isoform 10 | XP_984334.1 |  | 0.86 |  |  |
| PREDICTED: similar to Hexokinase-1 (Hexokinase type I) (HK I) (Hexokinase, tumor isozyme) isoform 11 | XP_984381.1 |  | 0.87 |  |  |
| PREDICTED: similar to Hexokinase-1 (Hexokinase type I) (HK I) (Hexokinase, tumor isozyme) isoform 3 | XP_984070.1 |  | 0.84 |  |  |
| PREDICTED: similar to Hexokinase-1 (Hexokinase type I) (HK I) (Hexokinase, tumor isozyme) isoform 4 | XP_984107.1 |  | 0.87 |  |  |
| PREDICTED: similar to Hexokinase-1 (Hexokinase type I) (HK I) (Hexokinase, tumor isozyme) isoform 5 | XP_984146.1 |  | 0.86 |  |  |
| PREDICTED: similar to Hexokinase-1 (Hexokinase type I) (HK I) (Hexokinase, tumor isozyme) isoform 6 | XP_984188.1 |  | 0.86 |  |  |
| PREDICTED: similar to Hexokinase-1 (Hexokinase type I) (HK I) (Hexokinase, tumor isozyme) isoform 7 | XP_984217.1 |  | 0.88 |  |  |
| PREDICTED: similar to Hexokinase-1 (Hexokinase type I) (HK I) (Hexokinase, tumor isozyme) isoform 9 | XP_984296.1 |  | 0.90 |  |  |
| PREDICTED: similar to Pyruvate kinase isozyme M2 isoform 3 | XP_984703.1 |  | 1.15 |  |  |
| PREDICTED: similar to Pyruvate kinase isozymes M1/M2 (Pyruvate kinase muscle isozyme) isoform 10 | XP_984927.1 |  | 1.05 |  |  |
| PREDICTED: similar to Pyruvate kinase isozymes M1/M2 (Pyruvate kinase muscle isozyme) isoform 11 | XP_984957.1 |  | 1.05 |  |  |
| PREDICTED: similar to Pyruvate kinase isozymes M1/M2 (Pyruvate kinase muscle isozyme) isoform 2 | XP_984670.1 |  | 1.04 |  |  |
| PREDICTED: similar to Pyruvate kinase isozymes M1/M2 (Pyruvate kinase muscle isozyme) isoform 4 | XP_984746.1 |  | 1.03 |  |  |
| PREDICTED: similar to Pyruvate kinase isozymes M1/M2 (Pyruvate kinase muscle isozyme) isoform 5 | XP_984779.1 |  | 1.03 |  |  |
| PREDICTED: similar to Pyruvate kinase isozymes M1/M2 (Pyruvate kinase muscle isozyme) isoform 6 | XP_984819.1 |  | 1.00 |  |  |
| PREDICTED: similar to Pyruvate kinase isozymes M1/M2 (Pyruvate kinase muscle isozyme) isoform 7 | XP_984847.1 |  | 1.06 |  |  |
| PREDICTED: similar to Pyruvate kinase isozymes M1/M2 (Pyruvate kinase muscle isozyme) isoform 8 | XP_984873.1 |  | 1.12 |  |  |
| PREDICTED: similar to Pyruvate kinase isozymes M1/M2 (Pyruvate kinase muscle isozyme) isoform 9 | XP_984899.1 |  | 1.01 |  |  |
| pyruvate kinase 3 | NP_035229.2 |  | 1.35 |  |  |
|  |  |  |  |  |  |
| **Glyoxylate and dicarboxylate metabolism** |  |  |  |  |  |
| aconitase 2, mitochondrial | NP_542364.1 | 1.07 | 1.00 | 0.96 | 1.32 |
| citrate synthase | NP_080720.1 | 0.93 | 0.97 | 0.86 | 1.25 |
| citrate synthase-like protein | NP_082221.1 | 0.69 | 1.06 | 0.90 | 1.37 |
| D-lactate dehydrogenase | NP_081846.3 | 0.79 |  |  | 0.66 |
| hydroxyacid oxidase (glycolate oxidase) 3 | NP_062418.2 |  |  |  | 1.27 |
| succinate-Coenzyme A ligase, ADP-forming, beta subunit | NP_035636.1 | 0.93 | 0.89 | 1.00 | 1.22 |
|  |  |  |  |  |  |
| **Histidine metabolism** |  |  |  |  |  |
| aldehyde dehydrogenase 2, mitochondrial | NP_033786.1 | 0.76 | 0.97 | 0.83 | 1.19 |
| aldehyde dehydrogenase family 6, subfamily A1 | NP_598803.1 | 0.90 | 1.15 | 0.94 | 0.99 |
| aldehyde dehydrogenase family 7, member A1 | NP_613066.1 | 0.99 | 1.20 |  | 1.16 |
|  |  |  |  |  |  |
| **Huntington's disease** |  |  |  |  |  |
| clathrin, heavy polypeptide (Hc) | NP_001003908.1 |  | 1.08 |  |  |
| ubiquitin C | NP_062613.2 |  | 0.99 |  |  |
| heat shock protein 9A | NP_034611.1 | 0.94 | 0.98 | 0.94 | 1.15 |
|  |  |  |  |  |  |
| **Hypoxia signaling in the cardiovascular system** |  |  |  |  |  |
| ubiquitin C | NP_062613.2 |  | 0.99 |  |  |
|  |  |  |  |  |  |
| **Lysine biosynthesis** |  |  |  |  |  |
| aminoadipate-semialdehyde synthase precursor | NP_038958.2 | 1.73 |  |  | 1.12 |
|  |  |  |  |  |  |
| **Lysine degradation** |  |  |  |  |  |
| 3-ketoacyl-CoA thiolase B | NP_666342.1 | 0.68 |  |  | 0.77 |
| acetyl-Coenzyme A acetyltransferase 1 precursor | NP_659033.1 | 0.69 | 0.93 | 0.98 | 0.77 |
| acetyl-Coenzyme A acyltransferase 1 | NP_570934.1 | 0.68 |  |  | 0.76 |
| acetyl-Coenzyme A acyltransferase 2 (mitochondrial 3-oxoacyl-Coenzyme A thiolase) | NP_803421.1 | 0.75 | 1.27 | 1.41 | 1.69 |
| aldehyde dehydrogenase 2, mitochondrial | NP_033786.1 | 0.76 | 0.97 | 0.83 | 1.19 |
| aldehyde dehydrogenase family 6, subfamily A1 | NP_598803.1 | 0.90 | 1.15 | 0.94 | 0.99 |
| aldehyde dehydrogenase family 7, member A1 | NP_613066.1 | 0.99 | 1.20 |  | 1.16 |
| aminoadipate-semialdehyde synthase precursor | NP_038958.2 | 1.73 |  |  | 1.12 |
| dihydrolipoamide S-acetyltransferase (E2 component of pyruvate dehydrogenase complex) | NP_663589.2 |  | 0.93 | 0.99 | 1.09 |
| dodecenoyl-Coenzyme A delta isomerase (3,2 trans-enoyl-Coenyme A isomerase) | NP_034153.2 | 0.83 | 1.14 | 1.11 | 1.32 |
| enoyl Coenzyme A hydratase, short chain, 1, mitochondrial | NP_444349.1 | 1.05 | 1.00 | 0.94 | 1.01 |
| enoyl coenzyme A hydratase 1, peroxisomal | NP_058052.1 |  |  | 1.56 |  |
| glutaryl-Coenzyme A dehydrogenase | NP_032123.1 | 0.95 |  |  | 1.00 |
| hydroxyacyl-Coenzyme A dehydrogenase/3-ketoacyl-Coenzyme A thiolase/enoyl-Coenzyme A hydratase (trifunctional protein), alpha subunit | NP_849209.1 | 1.16 | 1.33 | 1.20 | 1.52 |
| L-specific multifunctional beta-oxdiation protein | NP_076226.2 | 0.65 |  |  | 0.41 |
| serine hydroxymethyl transferase 2 (mitochondrial) | NP_082506.1 | 0.93 |  |  | 1.06 |
|  |  |  |  |  |  |
| **Metabolism of xenobiotics by cytochrome P450** |  |  |  |  |  |
| glutathione S-transferase, mu 1 | NP_034488.1 |  | 1.06 |  |  |
| glutathione S-transferase, mu 2 | NP_032209.1 |  | 1.16 |  |  |
| glutathione S-transferase, mu 4 | NP_081040.1 |  | 1.43 |  |  |
| PREDICTED: glutathione S-transferase, mu 7 isoform 4 | XP_905359.1 |  | 1.47 |  |  |
| PREDICTED: glutathione S-transferase, mu 7 isoform 5 | XP_905367.1 |  | 1.49 |  |  |
| PREDICTED: similar to Glutathione S-transferase Yb-3 (Chain 4) (GST Yb3) (GST class-mu 3) isoform 1 | XP_993199.1 |  | 1.09 |  |  |
| PREDICTED: similar to Glutathione S-transferase Yb-3 (Chain 4) (GST Yb3) (GST class-mu 3) isoform 11 | XP_927955.1 |  | 1.64 |  |  |
| PREDICTED: similar to Glutathione S-transferase Yb-3 (Chain 4) (GST Yb3) (GST class-mu 3) isoform 12 | XP_927960.1 |  | 1.28 |  |  |
| PREDICTED: similar to Glutathione S-transferase Yb-3 (Chain 4) (GST Yb3) (GST class-mu 3) isoform 2 | XP_993239.1 |  | 1.32 |  |  |
| PREDICTED: similar to Glutathione S-transferase Yb-3 (Chain 4) (GST Yb3) (GST class-mu 3) isoform 3 | XP_993269.1 |  | 1.43 |  |  |
| PREDICTED: similar to Glutathione S-transferase Yb-3 (Chain 4) (GST Yb3) (GST class-mu 3) isoform 4 | XP_993305.1 |  | 1.52 |  |  |
| PREDICTED: similar to Glutathione S-transferase Yb-3 (Chain 4) (GST Yb3) (GST class-mu 3) isoform 5 | XP_993337.1 |  | 1.32 |  |  |
| PREDICTED: similar to Glutathione S-transferase Yb-3 (Chain 4) (GST Yb3) (GST class-mu 3) isoform 6 | XP_908764.2 |  | 1.18 |  |  |
| PREDICTED: similar to Glutathione S-transferase Yb-3 (Chain 4) (GST Yb3) (GST class-mu 3) isoform 8 | XP_908949.1 |  | 1.37 |  |  |
| PREDICTED: similar to Glutathione S-transferase Yb-3 (Chain 4) (GST Yb3) (GST class-mu 3) isoform 9 | XP_998701.1 |  | 1.23 |  |  |
|  |  |  |  |  |  |
| **Methane metabolism** |  |  |  |  |  |
| peroxiredoxin 3 | NP_031478.1 | 0.93 | 1.04 | 0.94 | 1.18 |
| peroxiredoxin 5 precursor | NP_036151.1 | 0.87 | 0.93 | 0.97 | 1.01 |
| serine hydroxymethyl transferase 2 (mitochondrial) | NP_082506.1 | 0.93 |  |  | 1.06 |
|  |  |  |  |  |  |
| **Neurodegenerative Diseases** |  |  |  |  |  |
| heat shock protein 2 | NP_001002012.1 |  | 1.02 |  |  |
| heat shock protein 2 | NP_032327.2 |  | 1.10 |  |  |
| heat shock protein 8 | NP_112442.2 |  | 1.08 |  |  |
|  |  |  |  |  |  |
| **Nitrogen metabolism** |  |  |  |  |  |
| dimethylglycine dehydrogenase precursor | NP_083048.1 | 0.91 |  |  | 1.14 |
| fumarate hydratase 1 | NP_034339.1 | 1.02 | 1.04 | 0.90 | 1.08 |
| glutamate dehydrogenase 1 | NP_032159.1 | 0.70 | 1.27 | 0.76 | 1.64 |
| glutamine synthetase | NP_032157.2 |  | 1.12 |  |  |
|  |  |  |  |  |  |
| **None** |  |  |  |  |  |
| acyl-CoA synthetase medium-chain family member 2 | NP_666309.1 |  |  |  | 0.93 |
| biphenyl hydrolase-like (serine hydrolase, breast epithelial mucin-associated antigen) | NP_080788.1 | 0.77 | 1.06 |  | 0.94 |
| electron transferring flavoprotein, alpha polypeptide | NP_663590.2 | 0.85 | 1.15 | 1.00 | 1.06 |
| electron transferring flavoprotein, beta polypeptide | NP_080971.2 | 0.84 | 1.08 | 1.05 | 1.03 |
| glycine-N-acyltransferase | NP_666047.1 | 0.89 |  |  | 1.12 |
| heat shock protein 1 (chaperonin 10) | NP_032329.1 | 0.82 | 0.83 | 0.98 | 0.97 |
| hypothetical protein LOC217830 | NP_663423.2 |  |  |  | 1.45 |
| hypothetical protein LOC240549 | NP_001013784.1 | 0.90 |  |  |  |
| nudix (nucleoside diphosphate linked moiety X)-type motif 19 | NP_149071.1 |  |  |  | 0.50 |
| peptidylprolyl isomerase A | NP_032933.1 |  | 1.19 |  |  |
| PREDICTED: agmatine ureohydrolase (agmatinase) | XP_985387.1 | 1.04 |  |  |  |
| PREDICTED: carbamoyl-phosphate synthetase 1 isoform 1 | XP_129769.6 | 1.06 |  |  |  |
| PREDICTED: carbamoyl-phosphate synthetase 1 isoform 2 | XP_906671.1 | 1.02 |  |  |  |
| PREDICTED: glutaminase isoform 3 | XP_905264.1 |  | 0.88 |  |  |
| PREDICTED: glutaminase isoform 4 | XP_905269.1 |  | 0.90 |  |  |
| PREDICTED: hypothetical protein LOC338350 isoform 2 | XP_904660.1 |  |  | 1.19 | 0.94 |
| PREDICTED: similar to 10 kDa heat shock protein, mitochondrial (Hsp10) (10 kDa chaperonin) (CPN10) | XP_995914.1 | 0.83 | 0.84 | 1.10 | 0.99 |
| PREDICTED: similar to 3-hydroxy-3-methylglutaryl-Coenzyme A synthase 2 | XP_001005887.1 | 1.01 |  |  |  |
| PREDICTED: similar to acyl-Coenzyme A dehydrogenase family, member 10 isoform 1 | XP_001000566.1 |  |  | 1.11 | 0.93 |
| PREDICTED: similar to acyl-Coenzyme A dehydrogenase family, member 10 isoform 2 | XP_001000582.1 |  |  | 1.15 | 0.93 |
| PREDICTED: similar to acyl-Coenzyme A dehydrogenase family, member 10 isoform 3 | XP_001000598.1 |  |  | 0.93 | 1.00 |
| PREDICTED: similar to acyl-Coenzyme A dehydrogenase family, member 10 isoform 5 | XP_929217.1 |  |  | 1.12 | 0.97 |
| PREDICTED: similar to agmatine ureohydrolase (agmatinase) | XP_920494.1 | 1.07 |  |  |  |
| PREDICTED: similar to agmatine ureohydrolase (agmatinase) | XP_988208.1 | 1.04 |  |  |  |
| PREDICTED: similar to aldo-keto reductase family 1, member A4 (aldehyde reductase) | XP_979694.1 |  |  |  | 1.54 |
| PREDICTED: similar to Aspartate aminotransferase, mitochondrial precursor (Transaminase A) (Glutamate oxaloacetate transaminase 2) | XP_923115.2 | 0.78 | 0.69 | 1.19 | 1.59 |
| PREDICTED: similar to Carbamoyl-phosphate synthase [ammonia], mitochondrial precursor (Carbamoyl-phosphate synthetase I) (CPSase I) isoform 1 | XP_998540.1 | 1.04 |  |  |  |
| PREDICTED: similar to Carbamoyl-phosphate synthase [ammonia], mitochondrial precursor (Carbamoyl-phosphate synthetase I) (CPSase I) isoform 2 | XP_998560.1 | 1.06 |  |  |  |
| PREDICTED: similar to Carbamoyl-phosphate synthase [ammonia], mitochondrial precursor (Carbamoyl-phosphate synthetase I) (CPSase I) isoform 4 | XP_917169.1 | 1.06 |  |  |  |
| PREDICTED: similar to Carbamoyl-phosphate synthase [ammonia], mitochondrial precursor (Carbamoyl-phosphate synthetase I) (CPSase I) isoform 5 | XP_991941.1 | 1.06 |  |  |  |
| PREDICTED: similar to electron transferring flavoprotein, beta polypeptide | XP_001003118.1 | 0.86 | 1.01 | 1.05 | 1.05 |
| PREDICTED: similar to Glutamate dehydrogenase 1, mitochondrial precursor (GDH) isoform 2 | XP_992848.1 | 0.73 | 1.27 | 0.80 | 1.64 |
| PREDICTED: similar to Glutaminase kidney isoform, mitochondrial precursor (GLS) (L-glutamine amidohydrolase) (K-glutaminase) isoform 1 | XP_989835.1 |  | 0.89 |  |  |
| PREDICTED: similar to Glutaminase kidney isoform, mitochondrial precursor (GLS) (L-glutamine amidohydrolase) (K-glutaminase) isoform 3 | XP_990037.1 |  | 0.93 |  |  |
| PREDICTED: similar to Glutathione S-transferase Mu 2 (GST class-mu 2) (Glutathione S-transferase pmGT2) (GST 5-5) | XP_988896.1 |  | 1.09 |  |  |
| PREDICTED: similar to Glyceraldehyde-3-phosphate dehydrogenase (GAPDH) | XP_998786.1 |  | 1.25 |  |  |
| PREDICTED: similar to heat shock protein 8 | XP_994676.1 |  | 1.18 |  |  |
| PREDICTED: similar to isochorismatase domain containing 2 | XP_981476.1 | 0.78 | 1.04 | 1.22 | 1.37 |
| PREDICTED: similar to Phosphoglycerate mutase 1 (Phosphoglycerate mutase isozyme B) (PGAM-B) (BPG-dependent PGAM 1) | XP_982590.1 |  | 1.04 |  |  |
| PREDICTED: similar to polyubiquitin | XP_979732.1 |  | 0.99 |  |  |
| PREDICTED: similar to polyubiquitin isoform 3 | XP_001001919.1 |  | 0.98 |  |  |
| PREDICTED: similar to ribosomal protein S27a | XP_001001389.1 |  | 0.93 |  |  |
| PREDICTED: similar to Stress-70 protein, mitochondrial precursor (75 kDa glucose-regulated protein) (GRP 75) (Peptide-binding protein 74) (PBP74) (P66 MOT) (Mortalin) | XP_998318.1 | 0.99 | 0.98 | 0.84 | 1.10 |
| PREDICTED: similar to ubiquitin A-52 residue ribosomal protein fusion product 1 | XP_899768.1 |  | 1.08 |  |  |
| PREDICTED: similar to ubiquitin C isoform 18 | XP_001002029.1 |  | 1.02 |  |  |
| PREDICTED: similar to ubiquitin C isoform 22 | XP_001002053.1 |  | 1.02 |  |  |
| PREDICTED: similar to ubiquitin C isoform 25 | XP_001002019.1 |  | 0.94 |  |  |
| PREDICTED: similar to ubiquitin C isoform 29 | XP_001002045.1 |  | 0.98 |  |  |
| PREDICTED: similar to ubiquitin C isoform 4 | XP_001001910.1 |  | 0.97 |  |  |
| PREDICTED: similar to ubiquitin C isoform 4 | XP_001001988.1 |  | 0.95 |  |  |
| PREDICTED: similar to ubiquitin C isoform 8 | XP_001001949.1 |  | 0.97 |  |  |
| PREDICTED: similar to isochorismatase domain containing 2 | XP_979015.1 | 0.81 | 0.93 | 1.20 | 1.25 |
| SA hypertension-associated homolog | NP_058566.3 |  |  |  | 0.63 |
|  |  |  |  |  |  |
| **Notch signaling pathway** |  |  |  |  |  |
| glyoxylate reductase/hydroxypyruvate reductase | NP_525028.1 |  |  |  | 1.32 |
|  |  |  |  |  |  |
| **One carbon pool by folate** |  |  |  |  |  |
| dimethylglycine dehydrogenase precursor | NP_083048.1 | 0.91 |  |  | 1.14 |
| serine hydroxymethyl transferase 2 (mitochondrial) | NP_082506.1 | 0.93 |  |  | 1.06 |
|  |  |  |  |  |  |
| **NRF2-mediated oxidative stress response** |  |  |  |  |  |
| catalase | NP_033934.1 | 0.73 |  |  | 0.63 |
| superoxide dismutase 2, mitochondrial | NP_038699.2 | 0.87 | 0.96 | 0.93 | 1.32 |
| PREDICTED: glutathione S-transferase, mu 7 isoform 4 | XP_905359.1 |  | 1.47 |  |  |
| PREDICTED: glutathione S-transferase, mu 7 isoform 5 | XP_905367.1 |  | 1.49 |  |  |
| PREDICTED: similar to Glutathione S-transferase Yb-3 (Chain 4) (GST Yb3) (GST class-mu 3) isoform 1 | XP_993199.1 |  | 1.09 |  |  |
| PREDICTED: similar to Glutathione S-transferase Yb-3 (Chain 4) (GST Yb3) (GST class-mu 3) isoform 11 | XP_927955.1 |  | 1.64 |  |  |
| PREDICTED: similar to Glutathione S-transferase Yb-3 (Chain 4) (GST Yb3) (GST class-mu 3) isoform 12 | XP_927960.1 |  | 1.28 |  |  |
| PREDICTED: similar to Glutathione S-transferase Yb-3 (Chain 4) (GST Yb3) (GST class-mu 3) isoform 2 | XP_993239.1 |  | 1.32 |  |  |
| PREDICTED: similar to Glutathione S-transferase Yb-3 (Chain 4) (GST Yb3) (GST class-mu 3) isoform 3 | XP_993269.1 |  | 1.43 |  |  |
| PREDICTED: similar to Glutathione S-transferase Yb-3 (Chain 4) (GST Yb3) (GST class-mu 3) isoform 4 | XP_993305.1 |  | 1.52 |  |  |
| PREDICTED: similar to Glutathione S-transferase Yb-3 (Chain 4) (GST Yb3) (GST class-mu 3) isoform 5 | XP_993337.1 |  | 1.32 |  |  |
| PREDICTED: similar to Glutathione S-transferase Yb-3 (Chain 4) (GST Yb3) (GST class-mu 3) isoform 6 | XP_908764.2 |  | 1.18 |  |  |
| PREDICTED: similar to Glutathione S-transferase Yb-3 (Chain 4) (GST Yb3) (GST class-mu 3) isoform 8 | XP_908949.1 |  | 1.37 |  |  |
| PREDICTED: similar to Glutathione S-transferase Yb-3 (Chain 4) (GST Yb3) (GST class-mu 3) isoform 9 | XP_998701.1 |  | 1.23 |  |  |
|  |  |  |  |  |  |
| **Pantothenate and CoA biosynthesis** |  |  |  |  |  |
| branched chain aminotransferase 2, mitochondrial | NP_033867.1 |  |  | 0.86 | 1.52 |
|  |  |  |  |  |  |
| **Parkinson's disease** |  |  |  |  |  |
| syntaxin 1B2 | NP_077725.1 |  | 1.89 |  |  |
| ubiquitin B | NP_035794.1 |  | 1.00 |  |  |
|  |  |  |  |  |  |
| **Pathogenic Escherichia coli infection - EHEC** |  |  |  |  |  |
| tubulin, alpha 1 | NP_035783.1 |  | 1.27 |  |  |
| tubulin, alpha 2 | NP_035784.1 |  | 1.20 |  |  |
| tubulin, alpha 3 | NP_033472.1 |  | 1.35 |  |  |
| tubulin, alpha 4 | NP_033473.1 |  | 1.30 |  |  |
| tubulin, alpha 6 | NP_033474.1 |  | 1.32 |  |  |
| tubulin, alpha 7 | NP_033475.1 |  | 1.37 |  |  |
| tubulin, alpha 8 | NP_059075.1 |  | 1.43 |  |  |
| tubulin, beta | NP_076205.1 |  | 1.27 |  |  |
| tubulin, beta 2 | NP_033476.1 |  | 1.28 |  |  |
| tubulin, beta 3 | NP_075768.1 |  | 1.37 |  |  |
| tubulin, beta 4 | NP_033477.2 |  | 1.18 |  |  |
| tubulin, beta 5 | NP_035785.1 |  | 1.30 |  |  |
| tubulin, beta 6 | NP_080749.2 |  | 1.16 |  |  |
| tubulin, beta, 2 | NP_666228.1 |  | 1.23 |  |  |
|  |  |  |  |  |  |
| **Pathogenic Escherichia coli infection - EPEC** |  |  |  |  |  |
| tubulin, alpha 1 | NP_035783.1 |  | 1.27 |  |  |
| tubulin, alpha 2 | NP_035784.1 |  | 1.20 |  |  |
| tubulin, alpha 3 | NP_033472.1 |  | 1.35 |  |  |
| tubulin, alpha 4 | NP_033473.1 |  | 1.30 |  |  |
| tubulin, alpha 6 | NP_033474.1 |  | 1.32 |  |  |
| tubulin, alpha 7 | NP_033475.1 |  | 1.37 |  |  |
| tubulin, alpha 8 | NP_059075.1 |  | 1.43 |  |  |
| tubulin, beta | NP_076205.1 |  | 1.27 |  |  |
| tubulin, beta 2 | NP_033476.1 |  | 1.28 |  |  |
| tubulin, beta 3 | NP_075768.1 |  | 1.37 |  |  |
| tubulin, beta 4 | NP_033477.2 |  | 1.18 |  |  |
| tubulin, beta 5 | NP_035785.1 |  | 1.30 |  |  |
| tubulin, beta 6 | NP_080749.2 |  | 1.16 |  |  |
| tubulin, beta, 2 | NP_666228.1 |  | 1.23 |  |  |
|  |  |  |  |  |  |
| **Pentose phosphate pathway** |  |  |  |  |  |
| aldolase 1, A isoform | NP_031464.1 |  | 1.00 |  |  |
| aldolase 3, C isoform | NP_033787.2 |  | 1.14 |  |  |
|  |  |  |  |  |  |
| **Peptidoglycan biosynthesis** |  |  |  |  |  |
| glutamine synthetase | NP_032157.2 |  | 1.12 |  |  |
|  |  |  |  |  |  |
| **Phenylalanine metabolism** |  |  |  |  |  |
| glutamate oxaloacetate transaminase 2, mitochondrial | NP_034455.1 | 0.76 | 0.69 | 1.25 | 1.54 |
| peroxiredoxin 3 | NP_031478.1 | 0.93 | 1.04 | 0.94 | 1.18 |
| peroxiredoxin 5 precursor | NP_036151.1 | 0.87 | 0.93 | 0.97 | 1.01 |
|  |  |  |  |  |  |
| **Phenylpropanoid biosynthesis** |  |  |  |  |  |
| hypothetical protein LOC264895 | NP_722502.1 | 0.94 | 1.22 |  |  |
| peroxiredoxin 3 | NP_031478.1 | 0.93 | 1.04 | 0.94 | 1.18 |
|  |  |  |  |  |  |
| **Polyunsaturated fatty acid biosynthesis** |  |  |  |  |  |
| acyl-Coenzyme A oxidase 1, palmitoyl | NP_056544.2 | 0.70 |  |  | 0.57 |
| acyl-Coenzyme A oxidase 2, branched chain | NP_444345.1 | 1.03 |  |  | 0.72 |
| acyl-Coenzyme A oxidase 3, pristanoyl | NP_109646.2 |  |  |  | 0.62 |
| hydroxyacyl-Coenzyme A dehydrogenase/3-ketoacyl-Coenzyme A thiolase/enoyl-Coenzyme A hydratase (trifunctional protein), alpha subunit | NP_849209.1 | 1.16 | 1.33 | 1.20 | 1.52 |
|  |  |  |  |  |  |
| **PPAR signaling pathway** |  |  |  |  |  |
| acetyl-Coenzyme A dehydrogenase, long-chain | NP_031407.2 | 0.89 | 1.25 | 1.14 | 1.18 |
| acetyl-Coenzyme A dehydrogenase, medium chain | NP_031408.1 | 0.96 | 1.12 | 1.03 | 0.94 |
| acyl-Coenzyme A dehydrogenase, short chain | NP_031409.2 | 0.76 | 1.45 | 1.11 | 1.03 |
| carnitine O-octanoyltransferase | NP_076222.1 | 0.70 |  |  | 0.68 |
| isovaleryl coenzyme A dehydrogenase | NP_062800.1 | 0.78 | 1.05 | 0.75 | 0.84 |
| ubiquitin B | NP_035794.1 |  | 1.00 |  |  |
|  |  |  |  |  |  |
| **Prion disease** |  |  |  |  |  |
| heat shock protein 2 | NP_001002012.1 |  | 1.02 |  |  |
| heat shock protein 2 | NP_032327.2 |  | 1.10 |  |  |
| heat shock protein 8 | NP_112442.2 |  | 1.08 |  |  |
|  |  |  |  |  |  |
| **Propanoate metabolism** |  |  |  |  |  |
| 3-ketoacyl-CoA thiolase B | NP_666342.1 | 0.68 |  |  | 0.77 |
| 4-aminobutyrate aminotransferase | NP_766549.2 | 1.04 | 1.11 |  | 1.10 |
| acetyl-Coenzyme A acetyltransferase 1 precursor | NP_659033.1 | 0.69 | 0.93 | 0.98 | 0.77 |
| acetyl-Coenzyme A acyltransferase 1 | NP_570934.1 | 0.68 |  |  | 0.76 |
| acetyl-Coenzyme A acyltransferase 2 (mitochondrial 3-oxoacyl-Coenzyme A thiolase) | NP_803421.1 | 0.75 | 1.27 | 1.41 | 1.69 |
| acetyl-Coenzyme A dehydrogenase, long-chain | NP_031407.2 | 0.89 | 1.25 | 1.14 | 1.18 |
| acetyl-Coenzyme A dehydrogenase, medium chain | NP_031408.1 | 0.96 | 1.12 | 1.03 | 0.94 |
| acyl-Coenzyme A dehydrogenase, short chain | NP_031409.2 | 0.76 | 1.45 | 1.11 | 1.03 |
| acyl-Coenzyme A dehydrogenase, very long chain | NP_059062.1 |  |  | 1.03 |  |
| aldehyde dehydrogenase 2, mitochondrial | NP_033786.1 | 0.76 | 0.97 | 0.83 | 1.19 |
| aldehyde dehydrogenase family 6, subfamily A1 | NP_598803.1 | 0.90 | 1.15 | 0.94 | 0.99 |
| aldehyde dehydrogenase family 7, member A1 | NP_613066.1 | 0.99 | 1.20 |  | 1.16 |
| dodecenoyl-Coenzyme A delta isomerase (3,2 trans-enoyl-Coenyme A isomerase) | NP_034153.2 | 0.83 | 1.14 | 1.11 | 1.32 |
| enoyl Coenzyme A hydratase, short chain, 1, mitochondrial | NP_444349.1 | 1.05 | 1.00 | 0.94 | 1.01 |
| enoyl coenzyme A hydratase 1, peroxisomal | NP_058052.1 |  |  | 1.56 |  |
| glutaryl-Coenzyme A dehydrogenase | NP_032123.1 | 0.95 |  |  | 1.00 |
| hydroxyacyl-Coenzyme A dehydrogenase/3-ketoacyl-Coenzyme A thiolase/enoyl-Coenzyme A hydratase (trifunctional protein), alpha subunit | NP_849209.1 | 1.16 | 1.33 | 1.20 | 1.52 |
| hydroxyacyl-Coenzyme A dehydrogenase type II | NP_058043.3 | 0.88 | 1.19 | 1.08 | 1.10 |
| isovaleryl coenzyme A dehydrogenase | NP_062800.1 | 0.78 | 1.05 | 0.75 | 0.84 |
| L-specific multifunctional beta-oxdiation protein | NP_076226.2 | 0.65 |  |  | 0.41 |
| malate dehydrogenase 2, NAD (mitochondrial) | NP_032643.2 | 0.91 | 0.97 | 0.76 | 1.30 |
| PREDICTED: hypothetical protein LOC338350 isoform 1 | XP_488540.2 |  |  | 1.15 | 0.93 |
| PREDICTED: similar to acyl-Coenzyme A dehydrogenase family, member 10 isoform 4 | XP_921248.1 |  |  | 1.09 | 0.93 |
| propionyl Coenzyme A carboxylase, beta polypeptide | NP_080111.1 | 1.03 | 1.03 | 0.82 | 1.11 |
| succinate-CoA ligase, GDP-forming, alpha subunit | NP_063932.1 | 1.03 | 0.89 | 1.19 | 1.18 |
| succinate-Coenzyme A ligase, ADP-forming, beta subunit | NP_035636.1 | 0.93 | 0.89 | 1.00 | 1.22 |
|  |  |  |  |  |  |
| **Protein ubiquitination pathway** |  |  |  |  |  |
| ubiquitin C | NP_062613.2 |  | 0.99 |  |  |
|  |  |  |  |  |  |
| **Purine metabolism** |  |  |  |  |  |
| adenylate kinase 3 | NP_067274.1 | 0.92 | 1.19 | 0.92 | 1.39 |
| collapsin response mediator protein 1 | NP_031791.3 |  | 1.27 |  |  |
| dihydropyrimidinase-like 2 | NP_034085.2 |  | 1.19 |  |  |
| PREDICTED: similar to Pyruvate kinase isozyme M2 isoform 3 | XP_984703.1 |  | 1.15 |  |  |
| PREDICTED: similar to Pyruvate kinase isozymes M1/M2 (Pyruvate kinase muscle isozyme) isoform 10 | XP_984927.1 |  | 1.05 |  |  |
| PREDICTED: similar to Pyruvate kinase isozymes M1/M2 (Pyruvate kinase muscle isozyme) isoform 11 | XP_984957.1 |  | 1.05 |  |  |
| PREDICTED: similar to Pyruvate kinase isozymes M1/M2 (Pyruvate kinase muscle isozyme) isoform 2 | XP_984670.1 |  | 1.04 |  |  |
| PREDICTED: similar to Pyruvate kinase isozymes M1/M2 (Pyruvate kinase muscle isozyme) isoform 4 | XP_984746.1 |  | 1.03 |  |  |
| PREDICTED: similar to Pyruvate kinase isozymes M1/M2 (Pyruvate kinase muscle isozyme) isoform 5 | XP_984779.1 |  | 1.03 |  |  |
| PREDICTED: similar to Pyruvate kinase isozymes M1/M2 (Pyruvate kinase muscle isozyme) isoform 6 | XP_984819.1 |  | 1.00 |  |  |
| PREDICTED: similar to Pyruvate kinase isozymes M1/M2 (Pyruvate kinase muscle isozyme) isoform 7 | XP_984847.1 |  | 1.06 |  |  |
| PREDICTED: similar to Pyruvate kinase isozymes M1/M2 (Pyruvate kinase muscle isozyme) isoform 8 | XP_984873.1 |  | 1.12 |  |  |
| PREDICTED: similar to Pyruvate kinase isozymes M1/M2 (Pyruvate kinase muscle isozyme) isoform 9 | XP_984899.1 |  | 1.01 |  |  |
| pyruvate kinase 3 | NP_035229.2 |  | 1.35 |  |  |
| Tu translation elongation factor, mitochondrial | NP_766333.1 | 1.07 | 1.14 | 0.89 | 1.32 |
|  |  |  |  |  |  |
| **Pyruvate metabolism** |  |  |  |  |  |
| 3-ketoacyl-CoA thiolase B | NP_666342.1 | 0.68 |  |  | 0.77 |
| acetyl-Coenzyme A acetyltransferase 1 precursor | NP_659033.1 | 0.69 | 0.93 | 0.98 | 0.77 |
| acetyl-Coenzyme A acyltransferase 1 | NP_570934.1 | 0.68 |  |  | 0.76 |
| acetyl-Coenzyme A acyltransferase 2 (mitochondrial 3-oxoacyl-Coenzyme A thiolase) | NP_803421.1 | 0.75 | 1.27 | 1.41 | 1.69 |
| dihydrolipoamide dehydrogenase | NP_031887.2 | 0.86 | 0.99 | 0.84 | 1.20 |
| dihydrolipoamide S-acetyltransferase (E2 component of pyruvate dehydrogenase complex) | NP_663589.2 |  | 0.93 | 0.99 | 1.09 |
| D-lactate dehydrogenase | NP_081846.3 | 0.79 |  |  | 0.66 |
| hydroxyacid oxidase (glycolate oxidase) 3 | NP_062418.2 |  |  |  | 1.27 |
| malate dehydrogenase 2, NAD (mitochondrial) | NP_032643.2 | 0.91 | 0.97 | 0.76 | 1.30 |
| malic enzyme 2, NAD(+)-dependent, mitochondrial | NP_663469.1 |  | 0.92 |  |  |
| nudix (nucleoside diphosphate linked moiety X)-type motif 7 isoform 1 | NP_077757.1 | 0.43 |  |  |  |
| nudix (nucleoside diphosphate linked moiety X)-type motif 7 isoform 2 | NP_077766.2 | 0.44 |  |  |  |
| PREDICTED: similar to Pyruvate kinase isozyme M2 isoform 3 | XP_984703.1 |  | 1.15 |  |  |
| PREDICTED: similar to Pyruvate kinase isozymes M1/M2 (Pyruvate kinase muscle isozyme) isoform 10 | XP_984927.1 |  | 1.05 |  |  |
| PREDICTED: similar to Pyruvate kinase isozymes M1/M2 (Pyruvate kinase muscle isozyme) isoform 11 | XP_984957.1 |  | 1.05 |  |  |
| PREDICTED: similar to Pyruvate kinase isozymes M1/M2 (Pyruvate kinase muscle isozyme) isoform 2 | XP_984670.1 |  | 1.04 |  |  |
| PREDICTED: similar to Pyruvate kinase isozymes M1/M2 (Pyruvate kinase muscle isozyme) isoform 4 | XP_984746.1 |  | 1.03 |  |  |
| PREDICTED: similar to Pyruvate kinase isozymes M1/M2 (Pyruvate kinase muscle isozyme) isoform 5 | XP_984779.1 |  | 1.03 |  |  |
| PREDICTED: similar to Pyruvate kinase isozymes M1/M2 (Pyruvate kinase muscle isozyme) isoform 6 | XP_984819.1 |  | 1.00 |  |  |
| PREDICTED: similar to Pyruvate kinase isozymes M1/M2 (Pyruvate kinase muscle isozyme) isoform 7 | XP_984847.1 |  | 1.06 |  |  |
| PREDICTED: similar to Pyruvate kinase isozymes M1/M2 (Pyruvate kinase muscle isozyme) isoform 8 | XP_984873.1 |  | 1.12 |  |  |
| PREDICTED: similar to Pyruvate kinase isozymes M1/M2 (Pyruvate kinase muscle isozyme) isoform 9 | XP_984899.1 |  | 1.01 |  |  |
| propionyl Coenzyme A carboxylase, beta polypeptide | NP_080111.1 | 1.03 | 1.03 | 0.82 | 1.11 |
| pyruvate carboxylase | NP_032823.1 | 1.14 | 1.20 |  | 1.10 |
| pyruvate kinase 3 | NP_035229.2 |  | 1.35 |  |  |
|  |  |  |  |  |  |
| **Reductive carboxylate cycle (CO2 fixation)** |  |  |  |  |  |
| aconitase 2, mitochondrial | NP_542364.1 | 1.07 | 1.00 | 0.96 | 1.32 |
| isocitrate dehydrogenase 2 (NADP+), mitochondrial | NP_766599.1 | 1.17 | 1.10 | 1.11 | 1.27 |
| isocitrate dehydrogenase 3 (NAD+) alpha | NP_083849.1 |  | 0.87 | 0.88 | 1.52 |
| isocitrate dehydrogenase 3, beta subunit | NP_570954.1 |  | 1.02 | 1.20 | 1.15 |
| succinate-Coenzyme A ligase, ADP-forming, beta subunit | NP_035636.1 | 0.93 | 0.89 | 1.00 | 1.22 |
|  |  |  |  |  |  |
| **Ribosome** |  |  |  |  |  |
| PREDICTED: similar to ribosomal protein S27a | XP_889611.1 |  | 0.97 |  |  |
| ribosomal protein S27a | NP_001029037.1 |  | 1.00 |  |  |
| ribosomal protein S27a | NP_077239.1 |  | 0.98 |  |  |
| ubiquitin A-52 residue ribosomal protein fusion product 1 | NP_063936.1 |  | 0.99 |  |  |
| ubiquitin B | NP_035794.1 |  | 1.00 |  |  |
|  |  |  |  |  |  |
| **Selenoamino acid metabolism** |  |  |  |  |  |
| Tu translation elongation factor, mitochondrial | NP_766333.1 | 1.07 | 1.14 | 0.89 | 1.32 |
|  |  |  |  |  |  |
| **SNARE interactions in vesicular transport** |  |  |  |  |  |
| syntaxin 1B2 | NP_077725.1 |  | 1.89 |  |  |
|  |  |  |  |  |  |
| **Sphingolipid metabolism** |  |  |  |  |  |
| N-acylsphingosine amidohydrolase (acid ceramidase) 1 | NP_062708.1 |  | 0.93 |  |  |
|  |  |  |  |  |  |
| **Starch and sucrose metabolism** |  |  |  |  |  |
| hexokinase 1 | NP_034568.1 |  | 0.87 |  |  |
| PREDICTED: similar to hexokinase 1 isoform 8 | XP_984258.1 |  | 0.88 |  |  |
| PREDICTED: similar to hexokinase 1 isoform HKI-R isoform 1 | XP_983987.1 |  | 1.09 |  |  |
| PREDICTED: similar to Hexokinase-1 (Hexokinase type I) (HK I) (Brain form hexokinase) isoform 2 | XP_984038.1 |  | 0.83 |  |  |
| PREDICTED: similar to Hexokinase-1 (Hexokinase type I) (HK I) (Hexokinase, tumor isozyme) isoform 10 | XP_984334.1 |  | 0.86 |  |  |
| PREDICTED: similar to Hexokinase-1 (Hexokinase type I) (HK I) (Hexokinase, tumor isozyme) isoform 11 | XP_984381.1 |  | 0.87 |  |  |
| PREDICTED: similar to Hexokinase-1 (Hexokinase type I) (HK I) (Hexokinase, tumor isozyme) isoform 3 | XP_984070.1 |  | 0.84 |  |  |
| PREDICTED: similar to Hexokinase-1 (Hexokinase type I) (HK I) (Hexokinase, tumor isozyme) isoform 4 | XP_984107.1 |  | 0.87 |  |  |
| PREDICTED: similar to Hexokinase-1 (Hexokinase type I) (HK I) (Hexokinase, tumor isozyme) isoform 5 | XP_984146.1 |  | 0.86 |  |  |
| PREDICTED: similar to Hexokinase-1 (Hexokinase type I) (HK I) (Hexokinase, tumor isozyme) isoform 6 | XP_984188.1 |  | 0.86 |  |  |
| PREDICTED: similar to Hexokinase-1 (Hexokinase type I) (HK I) (Hexokinase, tumor isozyme) isoform 7 | XP_984217.1 |  | 0.88 |  |  |
| PREDICTED: similar to Hexokinase-1 (Hexokinase type I) (HK I) (Hexokinase, tumor isozyme) isoform 9 | XP_984296.1 |  | 0.90 |  |  |
|  |  |  |  |  |  |
| **Streptomycin biosynthesis** |  |  |  |  |  |
| hexokinase 1 | NP_034568.1 |  | 0.87 |  |  |
| PREDICTED: similar to hexokinase 1 isoform 8 | XP_984258.1 |  | 0.88 |  |  |
| PREDICTED: similar to hexokinase 1 isoform HKI-R isoform 1 | XP_983987.1 |  | 1.09 |  |  |
| PREDICTED: similar to Hexokinase-1 (Hexokinase type I) (HK I) (Brain form hexokinase) isoform 2 | XP_984038.1 |  | 0.83 |  |  |
| PREDICTED: similar to Hexokinase-1 (Hexokinase type I) (HK I) (Hexokinase, tumor isozyme) isoform 10 | XP_984334.1 |  | 0.86 |  |  |
| PREDICTED: similar to Hexokinase-1 (Hexokinase type I) (HK I) (Hexokinase, tumor isozyme) isoform 11 | XP_984381.1 |  | 0.87 |  |  |
| PREDICTED: similar to Hexokinase-1 (Hexokinase type I) (HK I) (Hexokinase, tumor isozyme) isoform 3 | XP_984070.1 |  | 0.84 |  |  |
| PREDICTED: similar to Hexokinase-1 (Hexokinase type I) (HK I) (Hexokinase, tumor isozyme) isoform 4 | XP_984107.1 |  | 0.87 |  |  |
| PREDICTED: similar to Hexokinase-1 (Hexokinase type I) (HK I) (Hexokinase, tumor isozyme) isoform 5 | XP_984146.1 |  | 0.86 |  |  |
| PREDICTED: similar to Hexokinase-1 (Hexokinase type I) (HK I) (Hexokinase, tumor isozyme) isoform 6 | XP_984188.1 |  | 0.86 |  |  |
| PREDICTED: similar to Hexokinase-1 (Hexokinase type I) (HK I) (Hexokinase, tumor isozyme) isoform 7 | XP_984217.1 |  | 0.88 |  |  |
| PREDICTED: similar to Hexokinase-1 (Hexokinase type I) (HK I) (Hexokinase, tumor isozyme) isoform 9 | XP_984296.1 |  | 0.90 |  |  |
|  |  |  |  |  |  |
| **Sulfur metabolism** |  |  |  |  |  |
| Tu translation elongation factor, mitochondrial | NP_766333.1 | 1.07 | 1.14 | 0.89 | 1.32 |
|  |  |  |  |  |  |
| **Synthesis and degradation of ketone bodies** |  |  |  |  |  |
| 3-hydroxy-3-methylglutaryl-Coenzyme A synthase 2 | NP_032282.2 | 1.01 |  |  |  |
| 3-oxoacid CoA transferase 1 | NP_077150.1 |  | 1.15 | 0.88 | 1.19 |
| hydroxyacyl-Coenzyme A dehydrogenase type II | NP_058043.3 | 0.88 | 1.19 | 1.08 | 1.10 |
| PREDICTED: similar to 3-hydroxy-3-methylglutaryl-Coenzyme A synthase 2 | XP_984323.1 | 1.01 |  |  |  |
|  |  |  |  |  |  |
| **T cell receptor signaling pathway** |  |  |  |  |  |
| pyruvate dehydrogenase kinase, isoenzyme 3 | NP_663605.1 |  | 0.79 |  |  |
|  |  |  |  |  |  |
| **Tetrachloroethene degradation** |  |  |  |  |  |
| aldo-keto reductase family 1, member A4 (aldehyde reductase) | NP_067448.1 |  |  |  | 1.43 |
|  |  |  |  |  |  |
| **TGF-β signaling** |  |  |  |  |  |
| ubiquitin C | NP_062613.2 |  | 0.99 |  |  |
|  |  |  |  |  |  |
| **Tryptophan metabolism** |  |  |  |  |  |
| 3-ketoacyl-CoA thiolase B | NP_666342.1 | 0.68 |  |  | 0.77 |
| acetyl-Coenzyme A acetyltransferase 1 precursor | NP_659033.1 | 0.69 | 0.93 | 0.98 | 0.77 |
| acetyl-Coenzyme A acyltransferase 1 | NP_570934.1 | 0.68 |  |  | 0.76 |
| acetyl-Coenzyme A acyltransferase 2 (mitochondrial 3-oxoacyl-Coenzyme A thiolase) | NP_803421.1 | 0.75 | 1.27 | 1.41 | 1.69 |
| enoyl coenzyme A hydratase 1, peroxisomal | NP_058052.1 |  |  | 1.56 |  |
| glutaryl-Coenzyme A dehydrogenase | NP_032123.1 | 0.95 |  |  | 1.00 |
| hydroxyacyl-Coenzyme A dehydrogenase type II | NP_058043.3 | 0.88 | 1.19 | 1.08 | 1.10 |
| L-specific multifunctional beta-oxdiation protein | NP_076226.2 | 0.65 |  |  | 0.41 |
|  |  |  |  |  |  |
| **Two-component system – General** |  |  |  |  |  |
| 3-ketoacyl-CoA thiolase B | NP_666342.1 | 0.68 |  |  | 0.77 |
| acetyl-Coenzyme A acetyltransferase 1 precursor | NP_659033.1 | 0.69 | 0.93 | 0.98 | 0.77 |
| acetyl-Coenzyme A acyltransferase 1 | NP_570934.1 | 0.68 |  |  | 0.76 |
| acetyl-Coenzyme A acyltransferase 2 (mitochondrial 3-oxoacyl-Coenzyme A thiolase) | NP_803421.1 | 0.75 | 1.27 | 1.41 | 1.69 |
|  |  |  |  |  |  |
| **Urea cycle and metabolism of amino groups** |  |  |  |  |  |
| aldehyde dehydrogenase 2, mitochondrial | NP_033786.1 | 0.76 | 0.97 | 0.83 | 1.19 |
| aldehyde dehydrogenase family 6, subfamily A1 | NP_598803.1 | 0.90 | 1.15 | 0.94 | 0.99 |
| aldehyde dehydrogenase family 7, member A1 | NP_613066.1 | 0.99 | 1.20 |  | 1.16 |
| ornithine transcarbamylase | NP_032795.1 | 0.79 |  |  |  |
|  |  |  |  |  |  |
| **Valine, leucine and isoleucine biosynthesis** |  |  |  |  |  |
| branched chain aminotransferase 2, mitochondrial | NP_033867.1 |  |  | 0.86 | 1.52 |
|  |  |  |  |  |  |
| **Valine, leucine and isoleucine degradation** |  |  |  |  |  |
| 3-hydroxy-3-methylglutaryl-Coenzyme A synthase 2 | NP_032282.2 | 1.01 |  |  |  |
| 3-ketoacyl-CoA thiolase B | NP_666342.1 | 0.68 |  |  | 0.77 |
| 3-oxoacid CoA transferase 1 | NP_077150.1 |  | 1.15 | 0.88 | 1.19 |
| 4-aminobutyrate aminotransferase | NP_766549.2 | 1.04 | 1.11 |  | 1.10 |
| acetyl-Coenzyme A acetyltransferase 1 precursor | NP_659033.1 | 0.69 | 0.93 | 0.98 | 0.77 |
| acetyl-Coenzyme A acyltransferase 1 | NP_570934.1 | 0.68 |  |  | 0.76 |
| acetyl-Coenzyme A acyltransferase 2 (mitochondrial 3-oxoacyl-Coenzyme A thiolase) | NP_803421.1 | 0.75 | 1.27 | 1.41 | 1.69 |
| acetyl-Coenzyme A dehydrogenase, long-chain | NP_031407.2 | 0.89 | 1.25 | 1.14 | 1.18 |
| acetyl-Coenzyme A dehydrogenase, medium chain | NP_031408.1 | 0.96 | 1.12 | 1.03 | 0.94 |
| acyl-Coenzyme A dehydrogenase, short chain | NP_031409.2 | 0.76 | 1.45 | 1.11 | 1.03 |
| acyl-Coenzyme A dehydrogenase, very long chain | NP_059062.1 |  |  | 1.03 |  |
| aldehyde dehydrogenase 2, mitochondrial | NP_033786.1 | 0.76 | 0.97 | 0.83 | 1.19 |
| aldehyde dehydrogenase family 6, subfamily A1 | NP_598803.1 | 0.90 | 1.15 | 0.94 | 0.99 |
| aldehyde dehydrogenase family 7, member A1 | NP_613066.1 | 0.99 | 1.20 |  | 1.16 |
| branched chain aminotransferase 2, mitochondrial | NP_033867.1 |  |  | 0.86 | 1.52 |
| dihydrolipoamide dehydrogenase | NP_031887.2 | 0.86 | 0.99 | 0.84 | 1.20 |
| dodecenoyl-Coenzyme A delta isomerase (3,2 trans-enoyl-Coenyme A isomerase) | NP_034153.2 | 0.83 | 1.14 | 1.11 | 1.32 |
| enoyl Coenzyme A hydratase, short chain, 1, mitochondrial | NP_444349.1 | 1.05 | 1.00 | 0.94 | 1.01 |
| enoyl coenzyme A hydratase 1, peroxisomal | NP_058052.1 |  |  | 1.56 |  |
| glutaryl-Coenzyme A dehydrogenase | NP_032123.1 | 0.95 |  |  | 1.00 |
| hydroxyacyl-Coenzyme A dehydrogenase/3-ketoacyl-Coenzyme A thiolase/enoyl-Coenzyme A hydratase (trifunctional protein), alpha subunit | NP_849209.1 | 1.16 | 1.33 | 1.20 | 1.52 |
| isovaleryl coenzyme A dehydrogenase | NP_062800.1 | 0.78 | 1.05 | 0.75 | 0.84 |
| L-specific multifunctional beta-oxdiation protein | NP_076226.2 | 0.65 |  |  | 0.41 |
| PREDICTED: similar to 3-hydroxy-3-methylglutaryl-Coenzyme A synthase 2 | XP_984323.1 | 1.01 |  |  |  |
| PREDICTED: hypothetical protein LOC338350 isoform 1 | XP_488540.2 |  |  | 1.15 | 0.93 |
| PREDICTED: similar to acyl-Coenzyme A dehydrogenase family, member 10 isoform 4 | XP_921248.1 |  |  | 1.09 | 0.93 |
| propionyl Coenzyme A carboxylase, beta polypeptide | NP_080111.1 | 1.03 | 1.03 | 0.82 | 1.11 |
|  |  |  |  |  |  |
| **Wnt signaling pathway** |  |  |  |  |  |
| glyoxylate reductase/hydroxypyruvate reductase | NP_525028.1 |  |  |  | 1.32 |
| ubiquitin C | NP_062613.2 |  | 0.99 |  |  |
|  |  |  |  |  |  |
