# Supplementary material for: Tissue-Specific Remodeling of the Mitochondrial Proteome in Type 1 Diabetic Akita Mice
Source: Oxford University Press journal article supplement (doi:10.2337/db09-0259), 2009-06-19
Supplement: db090259-sup-supplementaltable_s15.doc [file db090259-sup-supplementaltable_s15.doc]

**Table S15:** List of all proteins detected in membrane fractions of liver, brain, heart, and kidney mitochondria of Akita, presented as fold change compared to WT, and sorted by canonical pathways. Highlighted cells indicate a significant difference (p<0.05) compared to WT (red = increased, yellow = decreased). Empty cells = protein was not detected; WT only = protein was only detected in WT; Diabetic only = protein was only detected in Akita

| **Canonical pathway** | **Accession** | **Liver** | **Brain** | **Heart** | **Kidney** |
| --- | --- | --- | --- | --- | --- |
|  |  |  |  |  |  |
| **Adipocytokine signaling pathway** |  |  |  |  |  |
| acyl-CoA synthetase long-chain family member 6 isoform 2 | NP_001028769.1 |  | 1.11 |  |  |
| acyl-CoA synthetase long-chain family member 6 isoform 3 | NP_001028770.1 |  | 1.08 |  |  |
| acyl-CoA synthetase long-chain family member 6 isoform 4 | NP_001028771.1 |  | 1.19 |  |  |
| carnitine O-octanoyltransferase | NP_076222.1 | 0.93 |  |  | 0.66 |
|  |  |  |  |  |  |
| **Alanine and aspartate metabolism** |  |  |  |  |  |
| carnitine O-octanoyltransferase | NP_076222.1 | 0.93 |  |  | 0.66 |
| glutamate oxaloacetate transaminase 2, mitochondrial | NP_034455.1 | 1.00 | 1.06 | 0.87 | 1.02 |
| pyruvate carboxylase | NP_032823.1 | 0.88 |  |  | 0.84 |
| pyruvate dehydrogenase (lipoamide) beta | NP_077183.1 |  | 1.19 | 0.93 | 1.11 |
|  |  |  |  |  |  |
| **Alkaloid biosynthesis II** |  |  |  |  |  |
| PREDICTED: esterase 31 isoform 1 | XP_356125.2 | 0.50 |  |  |  |
| PREDICTED: esterase 31 isoform 4 | XP_907087.1 | 0.54 |  |  |  |
| PREDICTED: similar to Liver carboxylesterase 31 precursor (ES-Male) (Esterase-31) isoform 5 | XP_920143.1 | 0.51 |  |  |  |
| PREDICTED: similar to Liver carboxylesterase 31 precursor (ES-Male) (Esterase-31) isoform 8 | XP_928645.1 | 0.50 |  |  |  |
|  |  |  |  |  |  |
| **alpha-Linolenic acid metabolism** |  |  |  |  |  |
| acyl-Coenzyme A oxidase 1, palmitoyl | NP_056544.2 | 0.86 |  |  | 0.53 |
| acyl-Coenzyme A oxidase 3, pristanoyl | NP_109646.2 |  |  |  | 0.54 |
| hypothetical protein LOC264895 | NP_722502.1 | 0.79 |  |  |  |
|  |  |  |  |  |  |
| **Aminosugars metabolism** |  |  |  |  |  |
| diaphorase 1 | NP_084063.1 | 1.11 |  |  | WT only |
| hexokinase 1 | NP_034568.1 |  | 0.93 |  |  |
| PREDICTED: similar to hexokinase 1 isoform 8 | XP_984258.1 |  | 0.95 |  |  |
| PREDICTED: similar to hexokinase 1 isoform HKI-R isoform 1 | XP_983987.1 |  | 0.88 |  |  |
| PREDICTED: similar to Hexokinase-1 (Hexokinase type I) (HK I) (Hexokinase, tumor isozyme) isoform 10 | XP_984334.1 |  | 0.93 |  |  |
| PREDICTED: similar to Hexokinase-1 (Hexokinase type I) (HK I) (Hexokinase, tumor isozyme) isoform 11 | XP_984381.1 |  | 0.94 |  |  |
| PREDICTED: similar to Hexokinase-1 (Hexokinase type I) (HK I) (Hexokinase, tumor isozyme) isoform 3 | XP_984070.1 |  | 0.93 |  |  |
| PREDICTED: similar to Hexokinase-1 (Hexokinase type I) (HK I) (Hexokinase, tumor isozyme) isoform 4 | XP_984107.1 |  | 0.94 |  |  |
| PREDICTED: similar to Hexokinase-1 (Hexokinase type I) (HK I) (Hexokinase, tumor isozyme) isoform 5 | XP_984146.1 |  | 0.93 |  |  |
| PREDICTED: similar to Hexokinase-1 (Hexokinase type I) (HK I) (Hexokinase, tumor isozyme) isoform 6 | XP_984188.1 |  | 0.93 |  |  |
| PREDICTED: similar to Hexokinase-1 (Hexokinase type I) (HK I) (Hexokinase, tumor isozyme) isoform 7 | XP_984217.1 |  | 0.93 |  |  |
| PREDICTED: similar to Hexokinase-1 (Hexokinase type I) (HK I) (Hexokinase, tumor isozyme) isoform 9 | XP_984296.1 |  | 0.97 |  |  |
|  |  |  |  |  |  |
| **Amyotrophic lateral sclerosis (ALS)** |  |  |  |  |  |
| catalase | NP_033934.1 | 0.99 |  |  | 0.56 |
| RAB3A, member RAS oncogene family | NP_033027.1 |  | Diabetic only |  |  |
| RAB3B, member RAS oncogene family | NP_076026.1 |  | Diabetic only |  |  |
| RAB3C, member RAS oncogene family | NP_076341.1 |  | Diabetic only |  |  |
| RAB8B, member RAS oncogene family | NP_775589.1 |  | Diabetic only |  |  |
| solute carrier family 1 (glial high affinity glutamate transporter), member 2 | NP_035523.1 |  | 1.25 |  |  |
| solute carrier family 1 (glial high affinity glutamate transporter), member 3 | NP_683740.1 |  | 1.28 |  |  |
|  |  |  |  |  |  |
| **Androgen and estrogen metabolism** |  |  |  |  |  |
| cytochrome P450, family 27, subfamily a, polypeptide 1 | NP_077226.2 | 0.85 |  |  |  |
| hydroxysteroid (17-beta) dehydrogenase 4 | NP_032318.2 | 0.97 |  |  | 0.64 |
| retinol dehydrogenase 7 | NP_059501.1 | 0.74 |  |  |  |
| UDP glucuronosyltransferase 1 family, polypeptide A1 | NP_964007.1 | 0.99 |  |  |  |
| UDP glucuronosyltransferase 2 family, polypeptide B5 | NP_033493.1 | 1.11 |  |  |  |
|  |  |  |  |  |  |
| **Antigen processing and presentation** |  |  |  |  |  |
| heat shock protein 2 | NP_001002012.1 | WT only |  |  |  |
| heat shock protein 2 | NP_032327.2 | WT only |  |  |  |
| heat shock protein 8 | NP_112442.2 | WT only |  |  |  |
| prolyl 4-hydroxylase, beta polypeptide | NP_035162.1 | 0.78 |  |  |  |
| thymus cell antigen 1, theta | NP_033408.1 |  | 1.06 |  |  |
| tumor rejection antigen gp96 | NP_035761.1 | WT only |  |  |  |
|  |  |  |  |  |  |
| **Arachidonic acid metabolism** |  |  |  |  |  |
| cytochrome P450, family 2, subfamily c, polypeptide 29 | NP_031841.2 | WT only |  |  |  |
| epoxide hydrolase 2, cytoplasmic | NP_031966.2 | 1.02 |  |  | 0.64 |
| major urinary protein 1 | NP_112465.1 | 0.65 |  |  |  |
| microsomal glutathione S-transferase 1 | NP_064330.2 | 1.15 |  |  |  |
|  |  |  |  |  |  |
| **Arginine and proline metabolism** |  |  |  |  |  |
| amine oxidase (flavin-containing) | NP_766366.1 | 1.47 | 1.19 |  |  |
| creatine kinase, mitochondrial 2 | NP_940807.1 |  | 1.12 | 0.70 |  |
| D-amino acid oxidase 1 | NP_034148.1 |  |  |  | 0.66 |
| glutamate dehydrogenase 1 | NP_032159.1 | 0.61 | 1.33 |  | 1.18 |
| glutamate oxaloacetate transaminase 2, mitochondrial | NP_034455.1 | 1.00 | 1.06 | 0.87 | 1.02 |
| ornithine transcarbamylase | NP_032795.1 | 0.78 |  |  |  |
| proline dehydrogenase | NP_035302.1 | 1.15 |  |  | 1.08 |
|  |  |  |  |  |  |
| **Benzoate degradation via CoA ligation** |  |  |  |  |  |
| 3-ketoacyl-CoA thiolase B | NP_666342.1 | 0.94 |  |  | 0.58 |
| acetyl-Coenzyme A acetyltransferase 1 precursor | NP_659033.1 | 0.95 | 1.19 | 0.86 | 0.70 |
| dodecenoyl-Coenzyme A delta isomerase (3,2 trans-enoyl-Coenyme A isomerase) | NP_034153.2 | 0.86 |  | 0.81 |  |
| hydroxyacyl-Coenzyme A dehydrogenase/3-ketoacyl-Coenzyme A thiolase/enoyl-Coenzyme A hydratase (trifunctional protein), alpha subunit | NP_849209.1 | 1.18 | 1.25 | 1.41 | 1.14 |
| succinate dehydrogenase Fp subunit | NP_075770.1 | 1.15 | 1.05 | 0.90 | 0.98 |
| succinate dehydrogenase Ip subunit | NP_075863.2 | 1.19 | 0.98 | 0.96 | 1.01 |
|  |  |  |  |  |  |
| **beta-Alanine metabolism** |  |  |  |  |  |
| acyl-Coenzyme A dehydrogenase family, member 11 | NP_780533.2 | 1.06 |  |  | 0.66 |
| acyl-Coenzyme A dehydrogenase, very long chain | NP_059062.1 | 0.90 |  | 1.32 | 1.11 |
| dodecenoyl-Coenzyme A delta isomerase (3,2 trans-enoyl-Coenyme A isomerase) | NP_034153.2 | 0.86 |  | 0.81 |  |
| hydroxyacyl-Coenzyme A dehydrogenase/3-ketoacyl-Coenzyme A thiolase/enoyl-Coenzyme A hydratase (trifunctional protein), alpha subunit | NP_849209.1 | 1.18 | 1.25 | 1.41 | 1.14 |
| hydroxyacyl-Coenzyme A dehydrogenase/3-ketoacyl-Coenzyme A thiolase/enoyl-Coenzyme A hydratase (trifunctional protein), beta subunit | NP_663533.1 | 1.10 | 1.19 | 1.37 | 1.10 |
| L-specific multifunctional beta-oxdiation protein | NP_076226.2 | 0.97 |  |  | 0.52 |
|  |  |  |  |  |  |
| **Bile acid biosynthesis** |  |  |  |  |  |
| PREDICTED: esterase 31 isoform 1 | XP_356125.2 | 0.50 |  |  |  |
| PREDICTED: esterase 31 isoform 4 | XP_907087.1 | 0.54 |  |  |  |
| PREDICTED: similar to Liver carboxylesterase 31 precursor (ES-Male) (Esterase-31) isoform 5 | XP_920143.1 | 0.51 |  |  |  |
| PREDICTED: similar to Liver carboxylesterase 31 precursor (ES-Male) (Esterase-31) isoform 8 | XP_928645.1 | 0.50 |  |  |  |
|  |  |  |  |  |  |
| **Biotin metabolism** |  |  |  |  |  |
| Prohibitin | NP_032857.1 | 1.08 | 0.96 | 0.87 | 0.93 |
|  |  |  |  |  |  |
| **Butanoate metabolism** |  |  |  |  |  |
| 2-hydroxyphytanoyl-CoA lyase | NP_064359.2 | 0.94 |  |  |  |
| 3-hydroxy-3-methylglutaryl-Coenzyme A synthase 2 | NP_032282.2 | 0.85 |  |  |  |
| 3-hydroxybutyrate dehydrogenase (heart, mitochondrial) | NP_780386.2 | 1.09 | 1.20 |  | 0.74 |
| 3-ketoacyl-CoA thiolase B | NP_666342.1 | 0.94 |  |  | 0.58 |
| acetyl-Coenzyme A acetyltransferase 1 precursor | NP_659033.1 | 0.95 | 1.19 | 0.86 | 0.70 |
| dodecenoyl-Coenzyme A delta isomerase (3,2 trans-enoyl-Coenyme A isomerase) | NP_034153.2 | 0.86 |  | 0.81 |  |
| hydroxyacyl-Coenzyme A dehydrogenase/3-ketoacyl-Coenzyme A thiolase/enoyl-Coenzyme A hydratase (trifunctional protein), alpha subunit | NP_849209.1 | 1.18 | 1.25 | 1.41 | 1.14 |
| hydroxyacyl-Coenzyme A dehydrogenase/3-ketoacyl-Coenzyme A thiolase/enoyl-Coenzyme A hydratase (trifunctional protein), beta subunit | NP_663533.1 | 1.10 | 1.19 | 1.37 | 1.10 |
| hydroxysteroid (17-beta) dehydrogenase 4 | NP_032318.2 | 0.97 |  |  | 0.64 |
| hypothetical protein LOC264895 | NP_722502.1 | 0.79 |  |  |  |
| L-specific multifunctional beta-oxdiation protein | NP_076226.2 | 0.97 |  |  | 0.52 |
| PREDICTED: similar to 3-hydroxy-3-methylglutaryl-Coenzyme A synthase 2 | XP_984323.1 | 0.83 |  |  |  |
| pyruvate dehydrogenase (lipoamide) beta | NP_077183.1 |  | 1.19 | 0.93 | 1.11 |
| retinol dehydrogenase 7 | NP_059501.1 | 0.74 |  |  |  |
|  |  |  |  |  |  |
| **C21-Steroid hormone metabolism** |  |  |  |  |  |
| cytochrome P450, family 27, subfamily a, polypeptide 1 | NP_077226.2 | 0.85 |  |  |  |
| retinol dehydrogenase 7 | NP_059501.1 | 0.74 |  |  |  |
|  |  |  |  |  |  |
| **C5-Branched dibasic acid metabolism** |  |  |  |  |  |
| 2-hydroxyphytanoyl-CoA lyase | NP_064359.2 | 0.94 |  |  |  |
|  |  |  |  |  |  |
| **Caffeine metabolism** |  |  |  |  |  |
| urate oxidase | NP_033500.1 | 1.06 |  |  |  |
|  |  |  |  |  |  |
| **Calcium signaling pathway** |  |  |  |  |  |
| guanine nucleotide binding protein, alpha o | NP_034438.1 |  | 1.08 |  |  |
| solute carrier family 25 (mitochondrial carrier, dicarboxylate transporter), member 10 | NP_038798.1 | 0.84 |  |  | 0.81 |
| solute carrier family 25 (mitochondrial carrier, phosphate carrier), member 3 | NP_598429.1 | 0.97 | 1.09 | 0.97 | 1.04 |
| solute carrier family 25 (mitochondrial carrier; adenine nucleotide translocator), member 31 | NP_848473.1 | 1.35 | 0.93 | 1.20 | 0.99 |
| solute carrier family 25, member 5 | NP_031477.1 | 1.15 | 0.98 | 1.18 | 1.04 |
| voltage-dependent anion channel 1 | NP_035824.1 | 1.22 | 0.92 | 0.85 | 0.87 |
| voltage-dependent anion channel 3 | NP_035826.1 | 1.00 | 1.08 | 0.96 | 0.76 |
|  |  |  |  |  |  |
| **Caprolactam degradation** |  |  |  |  |  |
| dodecenoyl-Coenzyme A delta isomerase (3,2 trans-enoyl-Coenyme A isomerase) | NP_034153.2 | 0.86 |  | 0.81 |  |
| hydroxyacyl-Coenzyme A dehydrogenase/3-ketoacyl-Coenzyme A thiolase/enoyl-Coenzyme A hydratase (trifunctional protein), alpha subunit | NP_849209.1 | 1.18 | 1.25 | 1.41 | 1.14 |
| hydroxyacyl-Coenzyme A dehydrogenase/3-ketoacyl-Coenzyme A thiolase/enoyl-Coenzyme A hydratase (trifunctional protein), beta subunit | NP_663533.1 | 1.10 | 1.19 | 1.37 | 1.10 |
| N-acylsphingosine amidohydrolase (acid ceramidase) 1 | NP_062708.1 |  | 1.12 |  |  |
|  |  |  |  |  |  |
| **Cell adhesion molecules** |  |  |  |  |  |
| thymus cell antigen 1, theta | NP_033408.1 |  | 1.06 |  |  |
|  |  |  |  |  |  |
| **Chronic myeloid leukemia** |  |  |  |  |  |
| heat shock protein 2 | NP_001002012.1 | WT only |  |  |  |
| heat shock protein 2 | NP_032327.2 | WT only |  |  |  |
| heat shock protein 8 | NP_112442.2 | WT only |  |  |  |
|  |  |  |  |  |  |
| **Citrate cycle (TCA cycle)** |  |  |  |  |  |
| pyruvate carboxylase | NP_032823.1 | 0.88 |  |  | 0.84 |
| succinate-CoA ligase, GDP-forming, alpha subunit | NP_063932.1 | 0.98 | 1.14 | 1.12 | 0.97 |
| succinate dehydrogenase Fp subunit | NP_075770.1 | 1.15 | 1.05 | 0.90 | 0.98 |
| succinate dehydrogenase Ip subunit | NP_075863.2 | 1.19 | 0.98 | 0.96 | 1.01 |
|  |  |  |  |  |  |
| **Cysteine metabolism** |  |  |  |  |  |
| glutamate oxaloacetate transaminase 2, mitochondrial | NP_034455.1 | 1.00 | 1.06 | 0.87 | 1.02 |
| malate dehydrogenase 2, NAD (mitochondrial) | NP_032643.2 | 1.18 | 1.06 | 1.06 | 1.11 |
|  |  |  |  |  |  |
| **Estrogen receptor signaling** |  |  |  |  |  |
| B-cell receptor-associated protein 37 | NP_031557.1 | 1.04 | 1.12 | 0.83 | 0.87 |
|  |  |  |  |  |  |
| **Ether lipid metabolism** |  |  |  |  |  |
| retinol dehydrogenase 7 | NP_059501.1 | 0.74 |  |  |  |
|  |  |  |  |  |  |
| **Fatty acid elongation in mitochondria** |  |  |  |  |  |
| hydroxyacyl-Coenzyme A dehydrogenase/3-ketoacyl-Coenzyme A thiolase/enoyl-Coenzyme A hydratase (trifunctional protein), alpha subunit | NP_849209.1 | 1.18 | 1.25 | 1.41 | 1.14 |
| hydroxyacyl-Coenzyme A dehydrogenase/3-ketoacyl-Coenzyme A thiolase/enoyl-Coenzyme A hydratase (trifunctional protein), beta subunit | NP_663533.1 | 1.10 | 1.19 | 1.37 | 1.10 |
| hydroxysteroid (17-beta) dehydrogenase 4 | NP_032318.2 | 0.97 |  |  | 0.64 |
| L-specific multifunctional beta-oxdiation protein | NP_076226.2 | 0.97 |  |  | 0.52 |
| palmitoyl-protein thioesterase 1 | NP_032943.1 |  | 1.02 |  |  |
| peroxisomal trans 2-enoyl CoA reductase | NP_076012.2 | 1.01 |  |  | 0.47 |
|  |  |  |  |  |  |
| **Fatty acid metabolism** |  |  |  |  |  |
| 3-ketoacyl-CoA thiolase B | NP_666342.1 | 0.94 |  |  | 0.58 |
| acetyl-Coenzyme A acetyltransferase 1 precursor | NP_659033.1 | 0.95 | 1.19 | 0.86 | 0.70 |
| acyl-Coenzyme A dehydrogenase family, member 11 | NP_780533.2 | 1.06 |  |  | 0.66 |
| acyl-Coenzyme A dehydrogenase, very long chain | NP_059062.1 | 0.90 |  | 1.32 | 1.11 |
| acyl-Coenzyme A oxidase 1, palmitoyl | NP_056544.2 | 0.86 |  |  | 0.53 |
| acyl-Coenzyme A oxidase 3, pristanoyl | NP_109646.2 |  |  |  | 0.54 |
| acyl-CoA synthetase long-chain family member 6 isoform 1 | NP_659072.3 |  | 1.04 |  |  |
| acyl-CoA synthetase long-chain family member 6 isoform 2 | NP_001028769.1 |  | 1.11 |  |  |
| acyl-CoA synthetase long-chain family member 6 isoform 3 | NP_001028770.1 |  | 1.08 |  |  |
| acyl-CoA synthetase long-chain family member 6 isoform 4 | NP_001028771.1 |  | 1.19 |  |  |
| carnitine O-octanoyltransferase | NP_076222.1 | 0.93 |  |  | 0.66 |
| carnitine palmitoyltransferase 1b, muscle | NP_034078.1 |  |  | 1.12 |  |
| carnitine palmitoyltransferase 2 | NP_034079.1 | 1.27 |  | 1.23 | 1.00 |
| cytochrome P450, family 2, subfamily c, polypeptide 29 | NP_031841.2 | WT only |  |  |  |
| dodecenoyl-Coenzyme A delta isomerase (3,2 trans-enoyl-Coenyme A isomerase) | NP_034153.2 | 0.86 |  | 0.81 |  |
| hydroxyacyl-Coenzyme A dehydrogenase/3-ketoacyl-Coenzyme A thiolase/enoyl-Coenzyme A hydratase (trifunctional protein), alpha subunit | NP_849209.1 | 1.18 | 1.25 | 1.41 | 1.14 |
| hydroxyacyl-Coenzyme A dehydrogenase/3-ketoacyl-Coenzyme A thiolase/enoyl-Coenzyme A hydratase (trifunctional protein), beta subunit | NP_663533.1 | 1.10 | 1.19 | 1.37 | 1.10 |
| hydroxysteroid (17-beta) dehydrogenase 4 | NP_032318.2 | 0.97 |  |  | 0.64 |
| L-specific multifunctional beta-oxdiation protein | NP_076226.2 | 0.97 |  |  | 0.52 |
| peroxisomal delta3, delta2-enoyl-Coenzyme A isomerase | NP_035998.1 |  |  |  | WT only |
| PREDICTED: similar to acyl-CoA synthetase long-chain family member 1 isoform 1 | XP_996277.1 | 0.90 |  | 0.94 |  |
| solute carrier family 27 (fatty acid transporter), member 2 | NP_036108.1 | 1.05 |  |  | 0.68 |
|  |  |  |  |  |  |
| **Fructose and mannose metabolism** |  |  |  |  |  |
| hexokinase 1 | NP_034568.1 |  | 0.93 |  |  |
| PREDICTED: similar to hexokinase 1 isoform 8 | XP_984258.1 |  | 0.95 |  |  |
| PREDICTED: similar to hexokinase 1 isoform HKI-R isoform 1 | XP_983987.1 |  | 0.88 |  |  |
| PREDICTED: similar to Hexokinase-1 (Hexokinase type I) (HK I) (Hexokinase, tumor isozyme) isoform 10 | XP_984334.1 |  | 0.93 |  |  |
| PREDICTED: similar to Hexokinase-1 (Hexokinase type I) (HK I) (Hexokinase, tumor isozyme) isoform 11 | XP_984381.1 |  | 0.94 |  |  |
| PREDICTED: similar to Hexokinase-1 (Hexokinase type I) (HK I) (Hexokinase, tumor isozyme) isoform 3 | XP_984070.1 |  | 0.93 |  |  |
| PREDICTED: similar to Hexokinase-1 (Hexokinase type I) (HK I) (Hexokinase, tumor isozyme) isoform 4 | XP_984107.1 |  | 0.94 |  |  |
| PREDICTED: similar to Hexokinase-1 (Hexokinase type I) (HK I) (Hexokinase, tumor isozyme) isoform 5 | XP_984146.1 |  | 0.93 |  |  |
| PREDICTED: similar to Hexokinase-1 (Hexokinase type I) (HK I) (Hexokinase, tumor isozyme) isoform 6 | XP_984188.1 |  | 0.93 |  |  |
| PREDICTED: similar to Hexokinase-1 (Hexokinase type I) (HK I) (Hexokinase, tumor isozyme) isoform 7 | XP_984217.1 |  | 0.93 |  |  |
| PREDICTED: similar to Hexokinase-1 (Hexokinase type I) (HK I) (Hexokinase, tumor isozyme) isoform 9 | XP_984296.1 |  | 0.97 |  |  |
|  |  |  |  |  |  |
| **Galactose metabolism** |  |  |  |  |  |
| hexokinase 1 | NP_034568.1 |  | 0.93 |  |  |
| PREDICTED: similar to hexokinase 1 isoform 8 | XP_984258.1 |  | 0.95 |  |  |
| PREDICTED: similar to hexokinase 1 isoform HKI-R isoform 1 | XP_983987.1 |  | 0.88 |  |  |
| PREDICTED: similar to Hexokinase-1 (Hexokinase type I) (HK I) (Hexokinase, tumor isozyme) isoform 10 | XP_984334.1 |  | 0.93 |  |  |
| PREDICTED: similar to Hexokinase-1 (Hexokinase type I) (HK I) (Hexokinase, tumor isozyme) isoform 11 | XP_984381.1 |  | 0.94 |  |  |
| PREDICTED: similar to Hexokinase-1 (Hexokinase type I) (HK I) (Hexokinase, tumor isozyme) isoform 3 | XP_984070.1 |  | 0.93 |  |  |
| PREDICTED: similar to Hexokinase-1 (Hexokinase type I) (HK I) (Hexokinase, tumor isozyme) isoform 4 | XP_984107.1 |  | 0.94 |  |  |
| PREDICTED: similar to Hexokinase-1 (Hexokinase type I) (HK I) (Hexokinase, tumor isozyme) isoform 5 | XP_984146.1 |  | 0.93 |  |  |
| PREDICTED: similar to Hexokinase-1 (Hexokinase type I) (HK I) (Hexokinase, tumor isozyme) isoform 6 | XP_984188.1 |  | 0.93 |  |  |
| PREDICTED: similar to Hexokinase-1 (Hexokinase type I) (HK I) (Hexokinase, tumor isozyme) isoform 7 | XP_984217.1 |  | 0.93 |  |  |
| PREDICTED: similar to Hexokinase-1 (Hexokinase type I) (HK I) (Hexokinase, tumor isozyme) isoform 9 | XP_984296.1 |  | 0.97 |  |  |
|  |  |  |  |  |  |
| **gamma-Hexachlorocyclohexane degradation** |  |  |  |  |  |
| cytochrome P450, family 2, subfamily c, polypeptide 39 | NP_034133.1 | WT only |  |  |  |
|  |  |  |  |  |  |
| **GABA receptor signaling** |  |  |  |  |  |
| gamma-aminobutyric acid (GABA-A) transporter 4 | NP_766478.1 |  | 1.06 |  |  |
|  |  |  |  |  |  |
| **Gap junction** |  |  |  |  |  |
| guanine nucleotide binding protein, alpha o | NP_034438.1 |  | 1.08 |  |  |
| tubulin, alpha 1 | NP_035783.1 |  | 0.94 |  |  |
| tubulin, alpha 2 | NP_035784.1 |  | 0.87 |  |  |
| tubulin, alpha 3 | NP_033472.1 |  | 0.88 |  |  |
| tubulin, alpha 4 | NP_033473.1 |  | 0.79 |  |  |
| tubulin, alpha 6 | NP_033474.1 |  | 0.90 |  |  |
| tubulin, alpha 7 | NP_033475.1 |  | 0.77 |  |  |
|  |  |  |  |  |  |
| **Geraniol degradation** |  |  |  |  |  |
| dodecenoyl-Coenzyme A delta isomerase (3,2 trans-enoyl-Coenyme A isomerase) | NP_034153.2 | 0.86 |  | 0.81 |  |
|  |  |  |  |  |  |
| **Glutamate metabolism** |  |  |  |  |  |
| glutamate dehydrogenase 1 | NP_032159.1 | 0.61 | 1.33 |  | 1.18 |
| glutamate oxaloacetate transaminase 2, mitochondrial | NP_034455.1 | 1.00 | 1.06 | 0.87 | 1.02 |
| glutamine synthetase | NP_032157.2 |  | 1.09 |  |  |
|  |  |  |  |  |  |
| **Glutathione metabolism** |  |  |  |  |  |
| microsomal glutathione S-transferase 1 | NP_064330.2 | 1.15 |  |  |  |
|  |  |  |  |  |  |
| **Glycerolipid metabolism** |  |  |  |  |  |
| PREDICTED: esterase 31 isoform 1 | XP_356125.2 | 0.50 |  |  |  |
| PREDICTED: esterase 31 isoform 4 | XP_907087.1 | 0.54 |  |  |  |
| PREDICTED: similar to Liver carboxylesterase 31 precursor (ES-Male) (Esterase-31) isoform 5 | XP_920143.1 | 0.51 |  |  |  |
| PREDICTED: similar to Liver carboxylesterase 31 precursor (ES-Male) (Esterase-31) isoform 8 | XP_928645.1 | 0.50 |  |  |  |
|  |  |  |  |  |  |
| **Glycerophospholipid metabolism** |  |  |  |  |  |
| carnitine O-octanoyltransferase | NP_076222.1 | 0.93 |  |  | 0.66 |
| PREDICTED: esterase 31 isoform 1 | XP_356125.2 | 0.50 |  |  |  |
| PREDICTED: esterase 31 isoform 4 | XP_907087.1 | 0.54 |  |  |  |
| PREDICTED: similar to Liver carboxylesterase 31 precursor (ES-Male) (Esterase-31) isoform 5 | XP_920143.1 | 0.51 |  |  |  |
| PREDICTED: similar to Liver carboxylesterase 31 precursor (ES-Male) (Esterase-31) isoform 8 | XP_928645.1 | 0.50 |  |  |  |
| retinol dehydrogenase 7 | NP_059501.1 | 0.74 |  |  |  |
|  |  |  |  |  |  |
| **Glycine, serine and threonine metabolism** |  |  |  |  |  |
| amine oxidase (flavin-containing) | NP_766366.1 | 1.47 | 1.19 |  |  |
| choline dehydrogenase | NP_758468.1 | 1.20 |  |  | 0.79 |
| choline dehydrogenase | NP_780552.1 | 1.27 |  |  | 0.85 |
| D-amino acid oxidase 1 | NP_034148.1 |  |  |  | 0.66 |
| dimethylglycine dehydrogenase precursor | NP_083048.1 | 0.76 |  |  |  |
|  |  |  |  |  |  |
| **Glycolysis / Gluconeogenesis** |  |  |  |  |  |
| hexokinase 1 | NP_034568.1 |  | 0.93 |  |  |
| malate dehydrogenase 2, NAD (mitochondrial) | NP_032643.2 | 1.18 | 1.06 | 1.06 | 1.11 |
| PREDICTED: similar to acyl-CoA synthetase long-chain family member 1 isoform 1 | XP_996277.1 | 0.90 |  | 0.94 |  |
| PREDICTED: similar to hexokinase 1 isoform 8 | XP_984258.1 |  | 0.95 |  |  |
| PREDICTED: similar to hexokinase 1 isoform HKI-R isoform 1 | XP_983987.1 |  | 0.88 |  |  |
| PREDICTED: similar to Hexokinase-1 (Hexokinase type I) (HK I) (Hexokinase, tumor isozyme) isoform 10 | XP_984334.1 |  | 0.93 |  |  |
| PREDICTED: similar to Hexokinase-1 (Hexokinase type I) (HK I) (Hexokinase, tumor isozyme) isoform 11 | XP_984381.1 |  | 0.94 |  |  |
| PREDICTED: similar to Hexokinase-1 (Hexokinase type I) (HK I) (Hexokinase, tumor isozyme) isoform 3 | XP_984070.1 |  | 0.93 |  |  |
| PREDICTED: similar to Hexokinase-1 (Hexokinase type I) (HK I) (Hexokinase, tumor isozyme) isoform 4 | XP_984107.1 |  | 0.94 |  |  |
| PREDICTED: similar to Hexokinase-1 (Hexokinase type I) (HK I) (Hexokinase, tumor isozyme) isoform 5 | XP_984146.1 |  | 0.93 |  |  |
| PREDICTED: similar to Hexokinase-1 (Hexokinase type I) (HK I) (Hexokinase, tumor isozyme) isoform 6 | XP_984188.1 |  | 0.93 |  |  |
| PREDICTED: similar to Hexokinase-1 (Hexokinase type I) (HK I) (Hexokinase, tumor isozyme) isoform 7 | XP_984217.1 |  | 0.93 |  |  |
| PREDICTED: similar to Hexokinase-1 (Hexokinase type I) (HK I) (Hexokinase, tumor isozyme) isoform 9 | XP_984296.1 |  | 0.97 |  |  |
| pyruvate dehydrogenase (lipoamide) beta | NP_077183.1 |  | 1.19 | 0.93 | 1.11 |
|  |  |  |  |  |  |
| **Glyoxylate and dicarboxylate metabolism** |  |  |  |  |  |
| 2-hydroxyphytanoyl-CoA lyase | NP_064359.2 | 0.94 |  |  |  |
| hydroxyacid oxidase (glycolate oxidase) 3 | NP_062418.2 |  |  |  | 1.39 |
| hydroxyacid oxidase 1, liver | NP_034533.1 | 0.53 |  |  |  |
|  |  |  |  |  |  |
| **GnRH signaling pathway** |  |  |  |  |  |
| guanine nucleotide binding protein, alpha o | NP_034438.1 |  | 1.08 |  |  |
|  |  |  |  |  |  |
| **Hematopoietic cell lineage** |  |  |  |  |  |
| thymus cell antigen 1, theta | NP_033408.1 |  | 1.06 |  |  |
|  |  |  |  |  |  |
| **Histidine metabolism** |  |  |  |  |  |
| amine oxidase (flavin-containing) | NP_766366.1 | 1.47 | 1.19 |  |  |
|  |  |  |  |  |  |
| **Huntington’s disease** |  |  |  |  |  |
| heat shock 70kD protein 5 (glucose-regulated protein) | NP_071705.2 | 0.58 |  |  |  |
| heat shock protein 1A | NP_034609.1 | WT only |  |  |  |
| heat shock protein 1-like | NP_038586.1 | WT only |  |  |  |
|  |  |  |  |  |  |
| **Insulin signaling pathway** |  |  |  |  |  |
| RAB3A, member RAS oncogene family | NP_033027.1 |  | Diabetic only |  |  |
| RAB3B, member RAS oncogene family | NP_076026.1 |  | Diabetic only |  |  |
| RAB3C, member RAS oncogene family | NP_076341.1 |  | Diabetic only |  |  |
| RAB8B, member RAS oncogene family | NP_775589.1 |  | Diabetic only |  |  |
|  |  |  |  |  |  |
| **Limonene and pinene degradation** |  |  |  |  |  |
| cytochrome P450, family 2, subfamily c, polypeptide 39 | NP_034133.1 | WT only |  |  |  |
|  |  |  |  |  |  |
| **Long-term depression** |  |  |  |  |  |
| guanine nucleotide binding protein, alpha o | NP_034438.1 |  | 1.08 |  |  |
|  |  |  |  |  |  |
| **Lysine degradation** |  |  |  |  |  |
| 3-ketoacyl-CoA thiolase B | NP_666342.1 | 0.94 |  |  | 0.58 |
| acetyl-Coenzyme A acetyltransferase 1 precursor | NP_659033.1 | 0.95 | 1.19 | 0.86 | 0.70 |
| dodecenoyl-Coenzyme A delta isomerase (3,2 trans-enoyl-Coenyme A isomerase) | NP_034153.2 | 0.86 |  | 0.81 |  |
| hydroxyacyl-Coenzyme A dehydrogenase/3-ketoacyl-Coenzyme A thiolase/enoyl-Coenzyme A hydratase (trifunctional protein), alpha subunit | NP_849209.1 | 1.18 | 1.25 | 1.41 | 1.14 |
| hydroxyacyl-Coenzyme A dehydrogenase/3-ketoacyl-Coenzyme A thiolase/enoyl-Coenzyme A hydratase (trifunctional protein), beta subunit | NP_663533.1 | 1.10 | 1.19 | 1.37 | 1.10 |
| hydroxysteroid (17-beta) dehydrogenase 4 | NP_032318.2 | 0.97 |  |  | 0.64 |
| L-specific multifunctional beta-oxdiation protein | NP_076226.2 | 0.97 |  |  | 0.52 |
| Prohibitin | NP_032857.1 | 1.08 | 0.96 | 0.87 | 0.93 |
|  |  |  |  |  |  |
| **MAPK signaling pathway** |  |  |  |  |  |
| guanine nucleotide-binding protein, beta-1 subunit | NP_032168.1 |  | 1.00 |  |  |
|  |  |  |  |  |  |
| **Metabolism of xenobiotics by cytochrome P450** |  |  |  |  |  |
| cytochrome P450, family 2, subfamily c, polypeptide 29 | NP_031841.2 | WT only |  |  |  |
| microsomal glutathione S-transferase 1 | NP_064330.2 | 1.15 |  |  |  |
| UDP glucuronosyltransferase 1 family, polypeptide A1 | NP_964007.1 | 0.99 |  |  |  |
| UDP glucuronosyltransferase 2 family, polypeptide B5 | NP_033493.1 | 1.11 |  |  |  |
|  |  |  |  |  |  |
| **Methane metabolism** |  |  |  |  |  |
| catalase | NP_033934.1 | 0.99 |  |  | 0.56 |
| peroxiredoxin 5 precursor | NP_036151.1 | 0.93 | 0.93 | 0.74 | 1.11 |
|  |  |  |  |  |  |
| **mTOR signaling pathway** |  |  |  |  |  |
| RAB3A, member RAS oncogene family | NP_033027.1 |  | Diabetic only |  |  |
| RAB3B, member RAS oncogene family | NP_076026.1 |  | Diabetic only |  |  |
| RAB3C, member RAS oncogene family | NP_076341.1 |  | Diabetic only |  |  |
| RAB8B, member RAS oncogene family | NP_775589.1 |  | Diabetic only |  |  |
|  |  |  |  |  |  |
| **Naphthalene and anthracene degradation** |  |  |  |  |  |
| cytochrome P450, family 2, subfamily c, polypeptide 39 | NP_034133.1 | WT only |  |  |  |
|  |  |  |  |  |  |
| **Neurodegenerative Diseases** |  |  |  |  |  |
| heat shock protein 2 | NP_001002012.1 | WT only |  |  |  |
| heat shock protein 2 | NP_032327.2 | WT only |  |  |  |
| heat shock protein 8 | NP_112442.2 | WT only |  |  |  |
|  |  |  |  |  |  |
| **Nitrogen metabolism** |  |  |  |  |  |
| dimethylglycine dehydrogenase precursor | NP_083048.1 | 0.76 |  |  |  |
| glutamate dehydrogenase 1 | NP_032159.1 | 0.61 | 1.33 |  | 1.18 |
| glutamine synthetase | NP_032157.2 |  | 1.09 |  |  |
|  |  |  |  |  |  |
| **None** |  |  |  |  |  |
| acyl-CoA synthetase medium-chain family member 2 | NP_666309.1 |  |  |  | 0.88 |
| BM88 antigen | NP_067291.1 |  | 1.32 |  |  |
| cell division cycle 10 homolog | NP_033989.2 |  | Diabetic only |  |  |
| cyclic nucleotide phosphodiesterase 1 | NP_034053.1 |  | 0.83 |  |  |
| cytochrome b-5 | NP_080073.1 | 1.14 |  |  |  |
| electron transferring flavoprotein, beta polypeptide | NP_080971.2 | 0.76 |  | 0.86 | 1.18 |
| electron transferring flavoprotein, dehydrogenase | NP_080070.1 | 1.11 | 1.19 | 1.32 | 0.96 |
| Golli-mbp isoform 1 | NP_034907.1 |  | 0.87 |  |  |
| Golli-mbp isoform 2 | NP_001020416.1 |  | 0.83 |  |  |
| inner membrane protein, mitochondrial | NP_083949.2 | 1.22 | 1.10 | 0.99 | 1.03 |
| major urinary protein 2 | NP_032673.2 | 0.58 |  |  |  |
| mitochondrial Ca2+-dependent solute carrier | NP_666230.2 |  | 1.11 |  |  |
| mitochondrial carrier homolog 1 | NP_063933.1 |  | 0.77 |  |  |
| myelin basic protein isoform 1 | NP_001020422.1 |  | 0.87 |  |  |
| myelin basic protein isoform 2 | NP_001020425.1 |  | 0.88 |  |  |
| myelin basic protein isoform 3 | NP_001020426.1 |  | 0.88 |  |  |
| myelin basic protein isoform 4 | NP_001020427.1 |  | 0.88 |  |  |
| myelin basic protein isoform 5 | NP_001020429.1 |  | 0.87 |  |  |
| myelin basic protein isoform 6 | NP_001020430.1 |  | 0.88 |  |  |
| myelin oligodendrocyte glycoprotein | NP_034944.1 |  | 0.78 |  |  |
| Na+/K+ -ATPase beta 2 subunit | NP_038201.1 |  | 1.02 |  |  |
| PREDICTED: carbamoyl-phosphate synthetase 1 isoform 1 | XP_129769.6 | 0.96 |  |  |  |
| PREDICTED: carbamoyl-phosphate synthetase 1 isoform 2 | XP_906671.1 | 0.99 |  |  |  |
| PREDICTED: MOCO sulphurase C-terminal domain containing 1 isoform 1 | XP_129663.3 | 1.19 |  |  |  |
| PREDICTED: MOCO sulphurase C-terminal domain containing 1 isoform 2 | XP_904635.1 | 1.18 |  |  |  |
| PREDICTED: MOCO sulphurase C-terminal domain containing 1 isoform 3 | XP_904640.1 | 1.20 |  |  |  |
| PREDICTED: RAB26, member RAS oncogene family isoform 1 | XP_283428.5 |  | Diabetic only |  |  |
| PREDICTED: similar to 3 beta-hydroxysteroid dehydrogenase type 4 (3 beta-hydroxysteroid dehydrogenase type IV) (3Beta-HSD IV) (NADPH-dependent 3-beta-hydroxy-delta(5)-steroid dehydrogenase) (3-beta-hydroxy-5-ene steroid dehydrogenase) (Progesterone reductase)... | XP_001005256.1 |  |  |  | 1.28 |
| PREDICTED: similar to 3-hydroxybutyrate dehydrogenase (heart, mitochondrial) | XP_996670.1 | 1.16 | 1.09 |  | 0.74 |
| PREDICTED: similar to ADP/ATP translocase 2 (Adenine nucleotide translocator 2) (ANT 2) (ADP,ATP carrier protein 2) (Solute carrier family 25 member 5) | XP_484885.2 | 1.16 | 0.95 | 0.65 | 1.01 |
| PREDICTED: similar to ADP/ATP translocase 2 (Adenine nucleotide translocator 2) (ANT 2) (ADP,ATP carrier protein 2) (Solute carrier family 25 member 5) isoform 1 | XP_909149.1 | 1.16 | 0.95 | 0.62 | 1.00 |
| PREDICTED: similar to ADP/ATP translocase 1 (Adenine nucleotide translocator 1) (ANT 1) (ADP,ATP carrier protein 1) (Solute carrier family 25 member 4) (ADP,ATP carrier protein, heart/skeletal muscle isoform T1) (mANC1) isoform 2 | XP_996193.1 | 1.08 | 0.93 | 1.01 | 1.03 |
| PREDICTED: similar to Aspartate aminotransferase, mitochondrial precursor (Transaminase A) (Glutamate oxaloacetate transaminase 2) | XP_923115.2 | 0.99 | 1.09 | 0.89 | 0.99 |
| PREDICTED: similar to BM88 antigen isoform 1 | XP_001001289.1 |  | 1.32 |  |  |
| PREDICTED: similar to BM88 antigen isoform 2 | XP_001001299.1 |  | 1.30 |  |  |
| PREDICTED: similar to Carbamoyl-phosphate synthase [ammonia], mitochondrial precursor (Carbamoyl-phosphate synthetase I) (CPSase I) isoform 1 | XP_998540.1 | 1.01 |  |  |  |
| PREDICTED: similar to Carbamoyl-phosphate synthase [ammonia], mitochondrial precursor (Carbamoyl-phosphate synthetase I) (CPSase I) isoform 2 | XP_998560.1 | 0.96 |  |  |  |
| PREDICTED: similar to Carbamoyl-phosphate synthase [ammonia], mitochondrial precursor (Carbamoyl-phosphate synthetase I) (CPSase I) isoform 4 | XP_917169.1 | 0.96 |  |  |  |
| PREDICTED: similar to Carbamoyl-phosphate synthase [ammonia], mitochondrial precursor (Carbamoyl-phosphate synthetase I) (CPSase I) isoform 5 | XP_991941.1 | 0.96 |  |  |  |
| PREDICTED: similar to crystallin, zeta (predicted) | XP_992915.1 |  |  |  | 0.82 |
| PREDICTED: similar to cytochrome P450-like | XP_998972.1 | WT only |  |  |  |
| PREDICTED: similar to electron transferring flavoprotein, beta polypeptide | XP_001003118.1 | 0.83 |  | 0.88 | 1.22 |
| PREDICTED: similar to Glutamate dehydrogenase 1, mitochondrial precursor (GDH) (Memory-related protein 2) (MRG-2) | XP_988559.1 | 0.60 | 1.30 |  | 1.19 |
| PREDICTED: similar to Glutamate dehydrogenase 1, mitochondrial precursor (GDH) isoform 2 | XP_992848.1 | 0.62 | 1.33 |  | 1.19 |
| PREDICTED: similar to Glutamate dehydrogenase 1, mitochondrial precursor (GDH) isoform 3 | XP_992813.1 | 0.67 | 1.28 |  | 1.18 |
| PREDICTED: similar to heat shock protein 8 | XP_994676.1 | WT only |  |  |  |
| PREDICTED: similar to Liver carboxylesterase 31 precursor (ES-Male) (Esterase-31) isoform 3 | XP_001002831.1 | 0.52 |  |  |  |
| PREDICTED: similar to Liver carboxylesterase 31 precursor (ES-Male) (Esterase-31) isoform 4 | XP_001002836.1 | 0.48 |  |  |  |
| PREDICTED: similar to mitochondrial carrier homolog 1 | XP_996797.1 |  | 0.99 |  |  |
| PREDICTED: similar to Mitochondrial glutamate carrier 2 (Glutamate/H(+) symporter 2) (Solute carrier family 25 member 18) | XP_207112.2 |  | 1.11 |  |  |
| PREDICTED: similar to Mitochondrial glutamate carrier 2 (Glutamate/H(+) symporter 2) (Solute carrier family 25 member 18) | XP_922557.1 |  | 1.14 |  |  |
| PREDICTED: similar to Mitochondrial glutamate carrier 2 (Glutamate/H(+) symporter 2) (Solute carrier family 25 member 18) | XP_983486.1 | Diabetic only | 1.12 |  |  |
| PREDICTED: similar to MOCO sulphurase C-terminal domain containing 1 isoform 1 | XP_001000471.1 | 1.18 |  |  |  |
| PREDICTED: similar to MOCO sulphurase C-terminal domain containing 1 isoform 2 | XP_001000488.1 | 1.14 |  |  |  |
| PREDICTED: similar to MOCO sulphurase C-terminal domain containing 1 isoform 3 | XP_001000502.1 | 1.19 |  |  |  |
| PREDICTED: similar to MOCO sulphurase C-terminal domain containing 1 isoform 4 | XP_913022.1 | 1.25 |  |  |  |
| PREDICTED: similar to prohibitin | XP_978921.1 | 1.08 | 0.97 | 0.90 | 0.94 |
| PREDICTED: similar to Proline oxidase, mitochondrial precursor (Proline dehydrogenase) | XP_990374.1 | 1.27 |  |  | 1.08 |
| PREDICTED: similar to RAB8B, member RAS oncogene family | XP_985438.1 |  | Diabetic only |  |  |
| PREDICTED: similar to Ras-related protein Rab-26 | XP_992499.1 |  | Diabetic only |  |  |
| PREDICTED: similar to Ras-related protein Rab-26 isoform 4 | XP_919590.2 |  | Diabetic only |  |  |
| PREDICTED: similar to Ras-related protein Rab-3C isoform 2 | XP_980680.1 |  | Diabetic only |  |  |
| PREDICTED: similar to Ras-related protein Rab-3C isoform 5 | XP_980718.1 |  | Diabetic only |  |  |
| PREDICTED: similar to solute carrier family 25, member 4 isoform 1 | XP_996141.1 | 1.27 | 0.95 | 1.10 | 1.02 |
| PREDICTED: similar to Tubulin alpha-2 chain (Alpha-tubulin 2) isoform 1 | XP_998746.1 |  | 0.93 |  |  |
| PREDICTED: similar to tubulin, alpha 2 isoform 2 isoform 2 | XP_998765.1 |  | 0.93 |  |  |
| PREDICTED: solute carrier family 25 (mitochondrial carrier), member 18 | XP_110620.2 |  | 1.14 |  |  |
| PREDICTED: solute carrier family 25 (mitochondrial carrier, adenine nucleotide translocator), member 4 isoform 1 | XP_134169.3 | 1.06 | 0.93 | 1.02 | 1.05 |
| PREDICTED: solute carrier family 25 (mitochondrial carrier, adenine nucleotide translocator), member 4 isoform 2 | XP_902025.1 | 1.14 | 0.95 | 1.09 | 1.04 |
| prosaposin | NP_035309.2 |  | 1.14 |  |  |
| proteolipid protein 1 | NP_035253.1 |  | 0.79 |  |  |
| sideroflexin 1 | NP_081600.1 | 1.32 | 1.11 |  | 1.11 |
| sideroflexin 5 | NP_848754.1 |  | 1.19 |  |  |
| upregulated during skeletal muscle growth 5 | NP_075700.2 | 1.23 | 0.93 | 1.11 | 0.97 |
|  |  |  |  |  |  |
| **One carbon pool by folate** |  |  |  |  |  |
| dimethylglycine dehydrogenase precursor | NP_083048.1 | 0.76 |  |  |  |
|  |  |  |  |  |  |
| **Oxidative phosphorylation** |  |  |  |  |  |
| ATPase, H+/K+ transporting, nongastric, alpha polypeptide | NP_619593.1 |  | 0.98 |  |  |
| ATP synthase, H+ transporting, mitochondrial F1 complex, alpha subunit, isoform 1 | NP_031531.1 | 1.22 | 1.11 | 0.99 | 1.00 |
| ATP synthase, H+ transporting mitochondrial F1 complex, beta subunit | NP_058054.2 | 1.23 | 1.03 | 1.09 | 1.01 |
| ATP synthase, H+ transporting, mitochondrial F1 complex, delta subunit precursor | NP_079589.1 | 0.70 | 0.88 | WT only | 0.94 |
| ATP synthase, H+ transporting, mitochondrial F1 complex, gamma subunit | NP_065640.1 | 1.02 | 1.08 | 1.11 | 1.00 |
| ATP synthase, H+ transporting, mitochondrial F1 complex, O subunit | NP_613063.1 | 1.27 | 0.97 | 0.98 | 1.05 |
| ATP synthase, H+ transporting, mitochondrial F0 complex, subunit b, isoform 1 | NP_033855.2 | 1.11 | 0.99 | 1.00 | 0.98 |
| ATP synthase, H+ transporting, mitochondrial F0 complex, subunit d | NP_082138.1 | 1.49 | 0.95 | 1.03 | 1.04 |
| ATP synthase, H+ transporting, mitochondrial F0 complex, subunit F | NP_058035.1 | 1.41 | 1.28 | 1.04 | 1.03 |
| cytochrome c oxidase subunit II | NP_904331.1 | 1.18 | 1.00 | 0.84 | 1.11 |
| cytochrome c oxidase subunit IV isoform 1 | NP_034071.1 | 1.32 | 1.01 | 1.11 | 1.09 |
| cytochrome c oxidase, subunit Va | NP_031773.1 | 1.32 | 0.82 | 0.89 | 1.08 |
| cytochrome c oxidase, subunit VIb polypeptide 1 | NP_079904.1 | 1.15 | 1.11 | 0.95 | 1.01 |
| cytochrome c oxidase, subunit VIIa 1 | NP_034074.1 |  |  | 0.95 |  |
| NADH dehydrogenase (ubiquinone) 1 alpha subcomplex 10 | NP_077159.1 | 1.33 | 1.03 | 0.76 | 1.22 |
| NADH dehydrogenase (ubiquinone) 1 alpha subcomplex, 1 (7.5kD, MWFE) | NP_062316.1 |  | Diabetic only |  |  |
| NADH dehydrogenase (ubiquinone) 1 alpha subcomplex, 4 | NP_035016.1 | 1.19 | 1.06 | 1.03 | 1.04 |
| NADH dehydrogenase (ubiquinone) 1 alpha subcomplex, 8 | NP_080979.1 |  | 0.99 | 0.99 | 0.97 |
| NADH dehydrogenase (ubiquinone) 1 alpha subcomplex, 9 | NP_079634.1 | 1.56 | 0.90 | 0.93 | 1.01 |
| NADH dehydrogenase (ubiquinone) 1 beta subcomplex, 10 | NP_080960.1 | 2.22 | 0.88 | 0.82 | 1.19 |
| NADH dehydrogenase (ubiquinone) Fe-S protein 1 | NP_663493.1 | 1.18 | 1.01 | 0.84 | 1.11 |
| NADH dehydrogenase (ubiquinone) Fe-S protein 2 | NP_694704.1 | 1.54 | 0.93 | 0.92 | 1.05 |
| NADH dehydrogenase (ubiquinone) flavoprotein 1 | NP_598427.1 | 1.37 | 0.99 | 0.87 | 1.09 |
| PREDICTED: similar to ATP synthase coupling factor 6, mitochondrial precursor (ATPase subunit F6) | XP_980826.1 | 1.25 | 1.16 | 1.04 | 1.03 |
| PREDICTED: similar to NADH dehydrogenase (ubiquinone) Fe-S protein 6 | XP_894909.1 |  | 1.11 | 0.95 | 1.28 |
| ubiquinol-cytochrome c reductase core protein 1 | NP_079683.2 | 1.10 | 0.99 | 0.88 | 1.05 |
| ubiquinol cytochrome c reductase core protein 2 | NP_080175.1 | 1.12 | 0.96 | 0.92 | 1.01 |
| ubiquinol-cytochrome c reductase binding protein | NP_080495.1 | 0.84 | 0.92 | 1.09 | 0.98 |
| ubiquinol-cytochrome c reductase, Rieske iron-sulfur polypeptide 1 | NP_079986.1 | 1.15 | 1.01 | 0.93 | 1.10 |
| succinate dehydrogenase Fp subunit | NP_075770.1 | 1.15 | 1.05 | 0.90 | 0.98 |
| succinate dehydrogenase Ip subunit | NP_075863.2 | 1.19 | 0.98 | 0.96 | 1.01 |
|  |  |  |  |  |  |
| **NRF2-mediated oxidative stress response** |  |  |  |  |  |
| catalase | NP_033934.1 | 0.99 |  |  | 0.56 |
|  |  |  |  |  |  |
| **Pantothenate and CoA biosynthesis** |  |  |  |  |  |
| 2-hydroxyphytanoyl-CoA lyase | NP_064359.2 | 0.94 |  |  |  |
|  |  |  |  |  |  |
| **Pathogenic Escherichia coli infection – EHEC** |  |  |  |  |  |
| tubulin, alpha 1 | NP_035783.1 |  | 0.94 |  |  |
| tubulin, alpha 2 | NP_035784.1 |  | 0.87 |  |  |
| tubulin, alpha 3 | NP_033472.1 |  | 0.88 |  |  |
| tubulin, alpha 4 | NP_033473.1 |  | 0.79 |  |  |
| tubulin, alpha 6 | NP_033474.1 |  | 0.90 |  |  |
| tubulin, alpha 7 | NP_033475.1 |  | 0.77 |  |  |
|  |  |  |  |  |  |
| **Pathogenic Escherichia coli infection - EPEC** |  |  |  |  |  |
| tubulin, alpha 1 | NP_035783.1 |  | 0.94 |  |  |
| tubulin, alpha 2 | NP_035784.1 |  | 0.87 |  |  |
| tubulin, alpha 3 | NP_033472.1 |  | 0.88 |  |  |
| tubulin, alpha 4 | NP_033473.1 |  | 0.79 |  |  |
| tubulin, alpha 6 | NP_033474.1 |  | 0.90 |  |  |
| tubulin, alpha 7 | NP_033475.1 |  | 0.77 |  |  |
|  |  |  |  |  |  |
| **Pentose and glucuronate interconversions** |  |  |  |  |  |
| UDP glucuronosyltransferase 2 family, polypeptide B5 | NP_033493.1 | 1.11 |  |  |  |
|  |  |  |  |  |  |
| **Peptidoglycan biosynthesis** |  |  |  |  |  |
| glutamine synthetase | NP_032157.2 |  | 1.09 |  |  |
|  |  |  |  |  |  |
| **Phenylpropanoid biosynthesis** |  |  |  |  |  |
| cytochrome P450, family 2, subfamily c, polypeptide 39 | NP_034133.1 | WT only |  |  |  |
| hypothetical protein LOC264895 | NP_722502.1 | 0.79 |  |  |  |
|  |  |  |  |  |  |
| **Polyunsaturated fatty acid biosynthesis** |  |  |  |  |  |
| acyl-Coenzyme A oxidase 1, palmitoyl | NP_056544.2 | 0.86 |  |  | 0.53 |
| acyl-Coenzyme A oxidase 3, pristanoyl | NP_109646.2 |  |  |  | 0.54 |
| hydroxyacyl-Coenzyme A dehydrogenase/3-ketoacyl-Coenzyme A thiolase/enoyl-Coenzyme A hydratase (trifunctional protein), alpha subunit | NP_849209.1 | 1.18 | 1.25 | 1.41 | 1.14 |
| hydroxyacyl-Coenzyme A dehydrogenase/3-ketoacyl-Coenzyme A thiolase/enoyl-Coenzyme A hydratase (trifunctional protein), beta subunit | NP_663533.1 | 1.10 | 1.19 | 1.37 | 1.10 |
|  |  |  |  |  |  |
| **Porphyrin and chlorophyll metabolism** |  |  |  |  |  |
| UDP glucuronosyltransferase 2 family, polypeptide B5 | NP_033493.1 | 1.11 |  |  |  |
|  |  |  |  |  |  |
| **PPAR signaling pathway** |  |  |  |  |  |
| acyl-CoA synthetase long-chain family member 6 isoform 2 | NP_001028769.1 |  | 1.11 |  |  |
| acyl-CoA synthetase long-chain family member 6 isoform 3 | NP_001028770.1 |  | 1.08 |  |  |
| acyl-CoA synthetase long-chain family member 6 isoform 4 | NP_001028771.1 |  | 1.19 |  |  |
| carnitine O-octanoyltransferase | NP_076222.1 | 0.93 |  |  | 0.66 |
|  |  |  |  |  |  |
| **Prion disease** |  |  |  |  |  |
| heat shock protein 2 | NP_001002012.1 | WT only |  |  |  |
| heat shock protein 2 | NP_032327.2 | WT only |  |  |  |
| heat shock protein 8 | NP_112442.2 | WT only |  |  |  |
|  |  |  |  |  |  |
| **Propanoate metabolism** |  |  |  |  |  |
| 3-ketoacyl-CoA thiolase B | NP_666342.1 | 0.94 |  |  | 0.58 |
| acetyl-Coenzyme A acetyltransferase 1 precursor | NP_659033.1 | 0.95 | 1.19 | 0.86 | 0.70 |
| acyl-Coenzyme A dehydrogenase family, member 11 | NP_780533.2 | 1.06 |  |  | 0.66 |
| acyl-Coenzyme A dehydrogenase, very long chain | NP_059062.1 | 0.90 |  | 1.32 | 1.11 |
| dodecenoyl-Coenzyme A delta isomerase (3,2 trans-enoyl-Coenyme A isomerase) | NP_034153.2 | 0.86 |  | 0.81 |  |
| hydroxyacyl-Coenzyme A dehydrogenase/3-ketoacyl-Coenzyme A thiolase/enoyl-Coenzyme A hydratase (trifunctional protein), alpha subunit | NP_849209.1 | 1.18 | 1.25 | 1.41 | 1.14 |
| hydroxyacyl-Coenzyme A dehydrogenase/3-ketoacyl-Coenzyme A thiolase/enoyl-Coenzyme A hydratase (trifunctional protein), beta subunit | NP_663533.1 | 1.10 | 1.19 | 1.37 | 1.10 |
| L-specific multifunctional beta-oxdiation protein | NP_076226.2 | 0.97 |  |  | 0.52 |
| malate dehydrogenase 2, NAD (mitochondrial) | NP_032643.2 | 1.18 | 1.06 | 1.06 | 1.11 |
| PREDICTED: similar to acyl-CoA synthetase long-chain family member 1 isoform 1 | XP_996277.1 | 0.90 |  | 0.94 |  |
| succinate-CoA ligase, GDP-forming, alpha subunit | NP_063932.1 | 0.98 | 1.14 | 1.12 | 0.97 |
|  |  |  |  |  |  |
| **Prostate cancer** |  |  |  |  |  |
| tumor rejection antigen gp96 | NP_035761.1 | WT only |  |  |  |
|  |  |  |  |  |  |
| **Proteasome** |  |  |  |  |  |
| prolyl 4-hydroxylase, beta polypeptide | NP_035162.1 | 0.78 |  |  |  |
|  |  |  |  |  |  |
| **Protein ubiquitination pathway** |  |  |  |  |  |
| heat shock 70kD protein 5 (glucose-regulated protein) | NP_071705.2 | 0.58 |  |  |  |
|  |  |  |  |  |  |
| **Purine metabolism** |  |  |  |  |  |
| ATP-binding cassette, sub-family D, member 3 | NP_033017.2 | 0.88 |  |  | 0.63 |
| Tu translation elongation factor, mitochondrial | NP_766333.1 | 0.94 | 1.11 | 1.37 | 1.27 |
| urate oxidase | NP_033500.1 | 1.06 |  |  |  |
|  |  |  |  |  |  |
| **Pyrimidine metabolism** |  |  |  |  |  |
| prolyl 4-hydroxylase, beta polypeptide | NP_035162.1 | 0.78 |  |  |  |
|  |  |  |  |  |  |
| **Pyruvate metabolism** |  |  |  |  |  |
| 3-ketoacyl-CoA thiolase B | NP_666342.1 | 0.94 |  |  | 0.58 |
| acetyl-Coenzyme A acetyltransferase 1 precursor | NP_659033.1 | 0.95 | 1.19 | 0.86 | 0.70 |
| hydroxyacid oxidase (glycolate oxidase) 3 | NP_062418.2 |  |  |  | 1.39 |
| hydroxyacid oxidase 1, liver | NP_034533.1 | 0.53 |  |  |  |
| malate dehydrogenase 2, NAD (mitochondrial) | NP_032643.2 | 1.18 | 1.06 | 1.06 | 1.11 |
| PREDICTED: similar to acyl-CoA synthetase long-chain family member 1 isoform 1 | XP_996277.1 | 0.90 |  | 0.94 |  |
| pyruvate carboxylase | NP_032823.1 | 0.88 |  |  | 0.84 |
| pyruvate dehydrogenase (lipoamide) beta | NP_077183.1 |  | 1.19 | 0.93 | 1.11 |
|  |  |  |  |  |  |
| **Selenoamino acid metabolism** |  |  |  |  |  |
| Tu translation elongation factor, mitochondrial | NP_766333.1 | 0.94 | 1.11 | 1.37 | 1.27 |
|  |  |  |  |  |  |
| **Sphingolipid metabolism** |  |  |  |  |  |
| N-acylsphingosine amidohydrolase (acid ceramidase) 1 | NP_062708.1 |  | 1.12 |  |  |
| UDP glucuronosyltransferase 2 family, polypeptide B5 | NP_033493.1 | 1.11 |  |  |  |
|  |  |  |  |  |  |
| **Starch and sucrose metabolism** |  |  |  |  |  |
| hexokinase 1 | NP_034568.1 |  | 0.93 |  |  |
| PREDICTED: similar to hexokinase 1 isoform 8 | XP_984258.1 |  | 0.95 |  |  |
| PREDICTED: similar to hexokinase 1 isoform HKI-R isoform 1 | XP_983987.1 |  | 0.88 |  |  |
| PREDICTED: similar to Hexokinase-1 (Hexokinase type I) (HK I) (Hexokinase, tumor isozyme) isoform 10 | XP_984334.1 |  | 0.93 |  |  |
| PREDICTED: similar to Hexokinase-1 (Hexokinase type I) (HK I) (Hexokinase, tumor isozyme) isoform 11 | XP_984381.1 |  | 0.94 |  |  |
| PREDICTED: similar to Hexokinase-1 (Hexokinase type I) (HK I) (Hexokinase, tumor isozyme) isoform 3 | XP_984070.1 |  | 0.93 |  |  |
| PREDICTED: similar to Hexokinase-1 (Hexokinase type I) (HK I) (Hexokinase, tumor isozyme) isoform 4 | XP_984107.1 |  | 0.94 |  |  |
| PREDICTED: similar to Hexokinase-1 (Hexokinase type I) (HK I) (Hexokinase, tumor isozyme) isoform 5 | XP_984146.1 |  | 0.93 |  |  |
| PREDICTED: similar to Hexokinase-1 (Hexokinase type I) (HK I) (Hexokinase, tumor isozyme) isoform 6 | XP_984188.1 |  | 0.93 |  |  |
| PREDICTED: similar to Hexokinase-1 (Hexokinase type I) (HK I) (Hexokinase, tumor isozyme) isoform 7 | XP_984217.1 |  | 0.93 |  |  |
| PREDICTED: similar to Hexokinase-1 (Hexokinase type I) (HK I) (Hexokinase, tumor isozyme) isoform 9 | XP_984296.1 |  | 0.97 |  |  |
| solute carrier family 3 (activators of dibasic and neutral amino acid transport), member 2 | NP_032603.2 |  | 0.93 |  |  |
| UDP glucuronosyltransferase 1 family, polypeptide A1 | NP_964007.1 | 0.99 |  |  |  |
| UDP glucuronosyltransferase 2 family, polypeptide B5 | NP_033493.1 | 1.11 |  |  |  |
|  |  |  |  |  |  |
| **Streptomycin biosynthesis** |  |  |  |  |  |
| hexokinase 1 | NP_034568.1 |  | 0.93 |  |  |
| PREDICTED: similar to hexokinase 1 isoform 8 | XP_984258.1 |  | 0.95 |  |  |
| PREDICTED: similar to hexokinase 1 isoform HKI-R isoform 1 | XP_983987.1 |  | 0.88 |  |  |
| PREDICTED: similar to Hexokinase-1 (Hexokinase type I) (HK I) (Hexokinase, tumor isozyme) isoform 10 | XP_984334.1 |  | 0.93 |  |  |
| PREDICTED: similar to Hexokinase-1 (Hexokinase type I) (HK I) (Hexokinase, tumor isozyme) isoform 11 | XP_984381.1 |  | 0.94 |  |  |
| PREDICTED: similar to Hexokinase-1 (Hexokinase type I) (HK I) (Hexokinase, tumor isozyme) isoform 3 | XP_984070.1 |  | 0.93 |  |  |
| PREDICTED: similar to Hexokinase-1 (Hexokinase type I) (HK I) (Hexokinase, tumor isozyme) isoform 4 | XP_984107.1 |  | 0.94 |  |  |
| PREDICTED: similar to Hexokinase-1 (Hexokinase type I) (HK I) (Hexokinase, tumor isozyme) isoform 5 | XP_984146.1 |  | 0.93 |  |  |
| PREDICTED: similar to Hexokinase-1 (Hexokinase type I) (HK I) (Hexokinase, tumor isozyme) isoform 6 | XP_984188.1 |  | 0.93 |  |  |
| PREDICTED: similar to Hexokinase-1 (Hexokinase type I) (HK I) (Hexokinase, tumor isozyme) isoform 7 | XP_984217.1 |  | 0.93 |  |  |
| PREDICTED: similar to Hexokinase-1 (Hexokinase type I) (HK I) (Hexokinase, tumor isozyme) isoform 9 | XP_984296.1 |  | 0.97 |  |  |
|  |  |  |  |  |  |
| **Sulfur metabolism** |  |  |  |  |  |
| Tu translation elongation factor, mitochondrial | NP_766333.1 | 0.94 | 1.11 | 1.37 | 1.27 |
|  |  |  |  |  |  |
| **Synthesis and degradation of ketone bodies** |  |  |  |  |  |
| 3-hydroxy-3-methylglutaryl-Coenzyme A synthase 2 | NP_032282.2 | 0.85 |  |  |  |
| 3-hydroxybutyrate dehydrogenase (heart, mitochondrial) | NP_780386.2 | 1.09 | 1.20 |  | 0.74 |
| PREDICTED: similar to 3-hydroxy-3-methylglutaryl-Coenzyme A synthase 2 | XP_984323.1 | 0.83 |  |  |  |
| retinol dehydrogenase 7 | NP_059501.1 | 0.74 |  |  |  |
|  |  |  |  |  |  |
| **Taste transduction** |  |  |  |  |  |
| guanine nucleotide-binding protein, beta-1 subunit | NP_032168.1 |  | 1.00 |  |  |
|  |  |  |  |  |  |
| **T cell receptor signaling pathway** |  |  |  |  |  |
| thymus cell antigen 1, theta | NP_033408.1 |  | 1.06 |  |  |
|  |  |  |  |  |  |
| **Tight junction** |  |  |  |  |  |
| RAB3A, member RAS oncogene family | NP_033027.1 |  | Diabetic only |  |  |
| RAB3B, member RAS oncogene family | NP_076026.1 |  | Diabetic only |  |  |
| RAB3C, member RAS oncogene family | NP_076341.1 |  | Diabetic only |  |  |
| RAB8B, member RAS oncogene family | NP_775589.1 |  | Diabetic only |  |  |
|  |  |  |  |  |  |
| **Tryptophan metabolism** |  |  |  |  |  |
| 3-ketoacyl-CoA thiolase B | NP_666342.1 | 0.94 |  |  | 0.58 |
| acetyl-Coenzyme A acetyltransferase 1 precursor | NP_659033.1 | 0.95 | 1.19 | 0.86 | 0.70 |
| amine oxidase (flavin-containing) | NP_766366.1 | 1.47 | 1.19 |  |  |
| catalase | NP_033934.1 | 0.99 |  |  | 0.56 |
| cytochrome P450, family 2, subfamily c, polypeptide 29 | NP_031841.2 | WT only |  |  |  |
| hydroxysteroid (17-beta) dehydrogenase 4 | NP_032318.2 | 0.97 |  |  | 0.64 |
| L-specific multifunctional beta-oxdiation protein | NP_076226.2 | 0.97 |  |  | 0.52 |
|  |  |  |  |  |  |
| **Two-component system – General** |  |  |  |  |  |
| 3-ketoacyl-CoA thiolase B | NP_666342.1 | 0.94 |  |  | 0.58 |
| acetyl-Coenzyme A acetyltransferase 1 precursor | NP_659033.1 | 0.95 | 1.19 | 0.86 | 0.70 |
|  |  |  |  |  |  |
| **Ubiquinone biosynthesis** |  |  |  |  |  |
| NADH dehydrogenase (ubiquinone) Fe-S protein 1 | NP_663493.1 | 1.18 | 1.01 | 0.84 | 1.11 |
| NADH dehydrogenase (ubiquinone) Fe-S protein 2 | NP_694704.1 | 1.54 | 0.93 | 0.92 | 1.05 |
| NADH dehydrogenase (ubiquinone) flavoprotein 1 | NP_598427.1 | 1.37 | 0.99 | 0.87 | 1.09 |
|  |  |  |  |  |  |
| **Urea cycle and metabolism of amino groups** |  |  |  |  |  |
| ornithine aminotransferase | NP_058674.1 | 2.56 |  |  |  |
| ornithine transcarbamylase | NP_032795.1 | 0.78 |  |  |  |
|  |  |  |  |  |  |
| **Valine, leucine and isoleucine biosynthesis** |  |  |  |  |  |
| 2-hydroxyphytanoyl-CoA lyase | NP_064359.2 | 0.94 |  |  |  |
| pyruvate dehydrogenase (lipoamide) beta | NP_077183.1 |  | 1.19 | 0.93 | 1.11 |
|  |  |  |  |  |  |
| **Valine, leucine and isoleucine degradation** |  |  |  |  |  |
| 3-hydroxy-3-methylglutaryl-Coenzyme A synthase 2 | NP_032282.2 | 0.85 |  |  |  |
| 3-ketoacyl-CoA thiolase B | NP_666342.1 | 0.94 |  |  | 0.58 |
| acetyl-Coenzyme A acetyltransferase 1 precursor | NP_659033.1 | 0.95 | 1.19 | 0.86 | 0.70 |
| acyl-Coenzyme A dehydrogenase family, member 11 | NP_780533.2 | 1.06 |  |  | 0.66 |
| acyl-Coenzyme A dehydrogenase, very long chain | NP_059062.1 | 0.90 |  | 1.32 | 1.11 |
| dodecenoyl-Coenzyme A delta isomerase (3,2 trans-enoyl-Coenyme A isomerase) | NP_034153.2 | 0.86 |  | 0.81 |  |
| hydroxyacyl-Coenzyme A dehydrogenase/3-ketoacyl-Coenzyme A thiolase/enoyl-Coenzyme A hydratase (trifunctional protein), alpha subunit | NP_849209.1 | 1.18 | 1.25 | 1.41 | 1.14 |
| hydroxyacyl-Coenzyme A dehydrogenase/3-ketoacyl-Coenzyme A thiolase/enoyl-Coenzyme A hydratase (trifunctional protein), beta subunit | NP_663533.1 | 1.10 | 1.19 | 1.37 | 1.10 |
| hydroxysteroid (17-beta) dehydrogenase 4 | NP_032318.2 | 0.97 |  |  | 0.64 |
| L-specific multifunctional beta-oxdiation protein | NP_076226.2 | 0.97 |  |  | 0.52 |
| PREDICTED: similar to 3-hydroxy-3-methylglutaryl-Coenzyme A synthase 2 | XP_984323.1 | 0.83 |  |  |  |
|  |  |  |  |  |  |
