# Supplementary material for: Tissue-Specific Remodeling of the Mitochondrial Proteome in Type 1 Diabetic Akita Mice
Source: Oxford University Press journal article supplement (doi:10.2337/db09-0259), 2009-06-19
Supplement: db090259-sup-supplementaltables1.doc [file db090259-sup-supplementaltables1.doc]

**Table S1.** Numbers of proteins identified in the matrix or membrane fractions, or in both fractions, of liver, brain, heart and kidney mitochondria. Brackets show the percentage of proteins significantly regulated by diabetes.

| Organ | Matrix | Membrane | Matrix + Membrane |
| --- | --- | --- | --- |
| Liver | 83 (39%) | 135 (42%) | 218 (41%) |
| Brain | 154 (13%) | 141 (13%) | 295 (13%) |
| Heart | 54 (22%) | 69 (23%) | 123 (23%) |
| Kidney | 87 (52%) | 99 (23%) | 186 (38%) |
|  |  |  |  |
